# Supplementary material for: Digital mapping of soil texture in ecoforest polygons in Quebec, Canada
Source: PeerJ. 2021 Jun 23;9:e11685. doi: 10.7717/peerj.11685 (PMC8234928; doi:10.7717/peerj.11685)
Supplement: Supplemental Information 1 [file peerj-09-11685-s001.xlsx]

## Sheet: RawData
PlotID	Network	Latitude	Longitude	Horizon	PC_Sand	PC_Silt	PC_Clay	Altitude	Slope	ForestCover	SurfDeposit	ThickDeposit	Drainage	SoilPhysEnv	BioDomain	BioSubDomain	EcolRegion	Aridity	ConsDaysWithoutFrost	DaysWithoutFrost	DegreeDay	FirstFrostDay	GrowSeasLength	GrowSeasPrecip	GrowSeasRad	GrowSeasTmean	JulyTmean	LastFrostDay	PET	SnowfallProp	TMax	TMean	TMin	TotalPrecip	TotalRad	TotalSnowfall	TotalVPD	UtilPrecip	UtilVPD
7000601402	PSP	46.6473	-71.0196	C	82	9	9	137	A	Coniferous	Marine and littoral	Thick	Poorly drained	8	2	2east	2b	22.3733	120.884	188.134	1705.6	262.161	170.807	630.156	2890.66	14.5715	18.7861	142.272	449.189	30.0711	9.52623	4.23269	-1.10733	1175.1	4795.42	352.508	12.3538	360.002	15.6818
7000601501	PSP	46.6674	-70.6496	B	53	33	14	396	C	Coniferous	Glacial without particular morphology	Medium	Somewhat poorly drained	2	3	3east	3d	19.0463	100.985	179.264	1441.11	254.585	157.99	607.02	2759.7	13.5468	16.9519	154.602	419.24	33.1206	8.05266	2.99588	-2.09183	1220.4	4891.23	403.28	10.5616	371.642	13.2646
7000502702	PSP	45.6532	-73.2697	B	95	2	3	42	A	Coniferous	Marine and littoral	Thick	Moderately well drained	2	1	1	1a	62.9605	149.417	210.388	2124.25	274.897	188.956	575.888	3088.95	15.8446	20.5939	126.48	501.374	25.8175	11.5315	6.40225	1.28967	1005.08	4711.12	259.544	12.6403	289.72	16.6499
7000502702	PSP	45.6532	-73.2697	C	94	5	1	42	A	Coniferous	Marine and littoral	Thick	Moderately well drained	2	1	1	1a	62.9605	149.417	210.388	2124.25	274.897	188.956	575.888	3088.95	15.8446	20.5939	126.48	501.374	25.8175	11.5315	6.40225	1.28967	1005.08	4711.12	259.544	12.6403	289.72	16.6499
7000502801	PSP	45.6834	-72.266	B	40	32	28	179	B	Deciduous	Glacial without particular morphology	Medium	Moderately well drained	2	2	2east	2c	35.3914	130.448	200.686	1855.15	265.553	177.032	612.538	2954.1	14.9506	19.216	136.103	468.774	28.6344	10.3621	5.23332	0.105521	1147.63	4767.29	328.198	11.6137	340.584	14.752
7000502801	PSP	45.6834	-72.266	C	75	13	12	179	B	Deciduous	Glacial without particular morphology	Medium	Moderately well drained	2	2	2east	2c	35.3914	130.448	200.686	1855.15	265.553	177.032	612.538	2954.1	14.9506	19.216	136.103	468.774	28.6344	10.3621	5.23332	0.105521	1147.63	4767.29	328.198	11.6137	340.584	14.752
7000502901	PSP	45.7498	-73.1166	B	85	10	5	31	A	Deciduous	Marine and littoral	Thick	Moderately well drained	2	1	1	1a	56.4926	145.728	210.922	2102.5	271.721	190.655	595.348	3099.39	15.6468	20.4251	126.995	499.322	25.0827	11.3627	6.30598	1.2408	1014.56	4663.74	254.007	12.4265	299.307	16.1804
7000502901	PSP	45.7498	-73.1166	C	81	12	7	31	A	Deciduous	Marine and littoral	Thick	Moderately well drained	2	1	1	1a	56.4926	145.728	210.922	2102.5	271.721	190.655	595.348	3099.39	15.6468	20.4251	126.995	499.322	25.0827	11.3627	6.30598	1.2408	1014.56	4663.74	254.007	12.4265	299.307	16.1804
7000502902	PSP	45.7463	-73.1166	B	89	7	4	31	A	Coniferous	Marine and littoral	Thick	Well drained	2	1	1	1a	56.4926	145.728	210.922	2102.5	271.721	190.655	595.348	3099.39	15.6468	20.4251	126.995	499.322	25.0827	11.3627	6.30598	1.2408	1014.56	4663.74	254.007	12.4265	299.307	16.1804
7000502902	PSP	45.7463	-73.1166	C	91	4	5	31	A	Coniferous	Marine and littoral	Thick	Well drained	2	1	1	1a	56.4926	145.728	210.922	2102.5	271.721	190.655	595.348	3099.39	15.6468	20.4251	126.995	499.322	25.0827	11.3627	6.30598	1.2408	1014.56	4663.74	254.007	12.4265	299.307	16.1804
7000503001	PSP	45.8172	-72.4834	B	90	5	5	90	A	Deciduous	Marine and littoral	Thick	Somewhat poorly drained	2	2	2east	2b	49.0673	150.147	210.334	2060.18	275.803	187.8	614.745	3043.88	15.5534	20.3605	126.659	493.797	26.605	11.0878	6.11272	1.32831	1077.61	4670.75	285.965	11.7632	318.211	15.22
7000503001	PSP	45.8172	-72.4834	C	89	4	7	90	A	Deciduous	Marine and littoral	Thick	Somewhat poorly drained	2	2	2east	2b	49.0673	150.147	210.334	2060.18	275.803	187.8	614.745	3043.88	15.5534	20.3605	126.659	493.797	26.605	11.0878	6.11272	1.32831	1077.61	4670.75	285.965	11.7632	318.211	15.22
7000600902	PSP	46.5846	-71.4617	B	77	14	9	132	A	Mixed	Marine and littoral	Thick	Somewhat poorly drained	4	2	2east	2b	26.3651	129.739	194.384	1765.62	265.199	175.777	633.112	2900.75	14.6744	19.0829	136.461	456.928	28.9695	9.58251	4.52896	-0.438864	1143.34	4695.43	331.095	11.4013	345.677	14.6875
7000600902	PSP	46.5846	-71.4617	C	93	4	3	132	A	Mixed	Marine and littoral	Thick	Somewhat poorly drained	4	2	2east	2b	26.3651	129.739	194.384	1765.62	265.199	175.777	633.112	2900.75	14.6744	19.0829	136.461	456.928	28.9695	9.58251	4.52896	-0.438864	1143.34	4695.43	331.095	11.4013	345.677	14.6875
7000601001	PSP	46.5995	-71.6339	B	67	15	18	90	A	Mixed	Marine and littoral	Thick	Somewhat poorly drained	2	2	2east	2b	27.9225	131.204	195.951	1778.79	265.103	177.691	634.06	2911.18	14.6709	19.1902	134.9	459.345	28.1091	9.65616	4.60891	-0.434974	1123.52	4667.81	315.709	11.5978	339.95	15.0809
7000601001	PSP	46.5995	-71.6339	C	71	19	10	90	A	Mixed	Marine and littoral	Thick	Somewhat poorly drained	2	2	2east	2b	27.9225	131.204	195.951	1778.79	265.103	177.691	634.06	2911.18	14.6709	19.1902	134.9	459.345	28.1091	9.65616	4.60891	-0.434974	1123.52	4667.81	315.709	11.5978	339.95	15.0809
7000601002	PSP	46.5957	-71.6344	B	26	18	56	92	A	Coniferous	Marine and littoral	Thick	Somewhat poorly drained	2	2	2east	2b	27.9225	131.204	195.951	1778.79	265.103	177.691	634.06	2911.18	14.6709	19.1902	134.9	459.345	28.1091	9.65616	4.60891	-0.434974	1123.52	4667.81	315.709	11.5978	339.95	15.0809
7000601002	PSP	46.5957	-71.6344	B	59	18	23	92	A	Coniferous	Marine and littoral	Thick	Somewhat poorly drained	2	2	2east	2b	27.9225	131.204	195.951	1778.79	265.103	177.691	634.06	2911.18	14.6709	19.1902	134.9	459.345	28.1091	9.65616	4.60891	-0.434974	1123.52	4667.81	315.709	11.5978	339.95	15.0809
7000601002	PSP	46.5957	-71.6344	C	33	47	20	92	A	Coniferous	Marine and littoral	Thick	Somewhat poorly drained	2	2	2east	2b	27.9225	131.204	195.951	1778.79	265.103	177.691	634.06	2911.18	14.6709	19.1902	134.9	459.345	28.1091	9.65616	4.60891	-0.434974	1123.52	4667.81	315.709	11.5978	339.95	15.0809
7000601002	PSP	46.5957	-71.6344	C	81	8	11	92	A	Coniferous	Marine and littoral	Thick	Somewhat poorly drained	2	2	2east	2b	27.9225	131.204	195.951	1778.79	265.103	177.691	634.06	2911.18	14.6709	19.1902	134.9	459.345	28.1091	9.65616	4.60891	-0.434974	1123.52	4667.81	315.709	11.5978	339.95	15.0809
7000601101	PSP	46.6178	-70.4498	B	26	36	38	560	D	Coniferous	Glacial without particular morphology	Medium	Moderately well drained	2	3	3east	3d	14.9155	94.3218	173.931	1277.58	251.648	152.055	616.699	2710.81	12.7698	15.7515	158.317	401.22	37.3495	6.9642	2.17476	-2.78348	1333.42	4987.82	495.191	9.66563	391.468	11.7458
7000601101	PSP	46.6178	-70.4498	C	31	33	36	560	D	Coniferous	Glacial without particular morphology	Medium	Moderately well drained	2	3	3east	3d	14.9155	94.3218	173.931	1277.58	251.648	152.055	616.699	2710.81	12.7698	15.7515	158.317	401.22	37.3495	6.9642	2.17476	-2.78348	1333.42	4987.82	495.191	9.66563	391.468	11.7458
7000601102	PSP	46.6144	-70.4525	B	62	26	12	670	F	Mixed	Glacial without particular morphology	Thin to very thin	Well drained	2	3	3east	3d	13.9773	93.8005	169.353	1235.47	251.447	147.834	599.742	2677.27	12.7238	15.4913	158.648	394.705	37.7074	6.84165	1.94981	-2.94593	1325.23	5054.53	498.929	9.61686	393.67	11.5831
7000601201	PSP	46.618	-70.7827	B	52	24	24	317	B	Mixed	Glacial without particular morphology	Medium	Moderately well drained	2	3	3east	3d	18.4516	101.583	178.143	1483.54	254.184	159.072	605.558	2762.16	13.7887	17.3829	153.6	423.303	31.0565	8.29073	3.07388	-2.21809	1163.02	4859.62	360.837	11.1817	371.831	13.9555
7000601201	PSP	46.618	-70.7827	C	56	21	23	317	B	Mixed	Glacial without particular morphology	Medium	Moderately well drained	2	3	3east	3d	18.4516	101.583	178.143	1483.54	254.184	159.072	605.558	2762.16	13.7887	17.3829	153.6	423.303	31.0565	8.29073	3.07388	-2.21809	1163.02	4859.62	360.837	11.1817	371.831	13.9555
7000601202	PSP	46.621	-70.7863	B	50	27	23	311	A	Deciduous	Glacial without particular morphology	Medium	Somewhat poorly drained	6	3	3east	3d	18.8979	103.245	179.391	1502.97	254.822	160.493	608.381	2775.47	13.8381	17.4937	152.576	425.569	31.0461	8.36655	3.17483	-2.16423	1162.8	4852.4	360.966	11.2313	369.856	14.024
7000601202	PSP	46.621	-70.7863	C	69	19	12	311	A	Deciduous	Glacial without particular morphology	Medium	Somewhat poorly drained	6	3	3east	3d	18.8979	103.245	179.391	1502.97	254.822	160.493	608.381	2775.47	13.8381	17.4937	152.576	425.569	31.0461	8.36655	3.17483	-2.16423	1162.8	4852.4	360.966	11.2313	369.856	14.024
7000601302	PSP	46.6532	-70.645	B	89	6	5	374	A	Coniferous	Juxtaglacial	Thick	Poorly drained	2	3	3east	3d	18.7553	100.655	178.703	1432.64	254.604	156.721	607.098	2740.54	13.5337	16.901	154.948	418.569	32.9182	8.05984	2.95966	-2.13252	1221.82	4897.01	401.185	10.64	374.481	13.3067
7000601302	PSP	46.6532	-70.645	C	70	16	14	374	A	Coniferous	Juxtaglacial	Thick	Poorly drained	2	3	3east	3d	18.7553	100.655	178.703	1432.64	254.604	156.721	607.098	2740.54	13.5337	16.901	154.948	418.569	32.9182	8.05984	2.95966	-2.13252	1221.82	4897.01	401.185	10.64	374.481	13.3067
7000601302	PSP	46.6532	-70.645	C	89	6	5	374	A	Coniferous	Juxtaglacial	Thick	Poorly drained	2	3	3east	3d	18.7553	100.655	178.703	1432.64	254.604	156.721	607.098	2740.54	13.5337	16.901	154.948	418.569	32.9182	8.05984	2.95966	-2.13252	1221.82	4897.01	401.185	10.64	374.481	13.3067
7000503002	PSP	45.8158	-72.4886	B	80	10	10	89	A	Deciduous	Marine and littoral	Thick	Poorly drained	2	2	2east	2b	49.5682	149.507	210.868	2084.86	275.199	188.142	612.612	3042.81	15.6596	20.4881	126.694	496.131	26.3933	11.1588	6.19151	1.26124	1072.75	4660.88	282.693	11.8513	318.7	15.3202
7000503002	PSP	45.8158	-72.4886	C	56	28	16	89	A	Deciduous	Marine and littoral	Thick	Poorly drained	2	2	2east	2b	49.5682	149.507	210.868	2084.86	275.199	188.142	612.612	3042.81	15.6596	20.4881	126.694	496.131	26.3933	11.1588	6.19151	1.26124	1072.75	4660.88	282.693	11.8513	318.7	15.3202
7000503101	PSP	45.8169	-72.9652	B	17	48	35	24	D	Mixed	Marine and littoral	Thick	Moderately well drained	3	1	1	1a	55.4389	146.144	211.994	2081.47	271.551	192.289	619.089	3097.79	15.4715	20.3529	126.404	497.478	25.1592	11.1	6.18349	1.26998	1051.69	4625.19	263.856	11.9692	306.431	15.7285
7000503101	PSP	45.8169	-72.9652	B	54	28	18	24	D	Mixed	Marine and littoral	Thick	Moderately well drained	3	1	1	1a	55.4389	146.144	211.994	2081.47	271.551	192.289	619.089	3097.79	15.4715	20.3529	126.404	497.478	25.1592	11.1	6.18349	1.26998	1051.69	4625.19	263.856	11.9692	306.431	15.7285
7000503101	PSP	45.8169	-72.9652	C	5	26	69	24	D	Mixed	Marine and littoral	Thick	Moderately well drained	3	1	1	1a	55.4389	146.144	211.994	2081.47	271.551	192.289	619.089	3097.79	15.4715	20.3529	126.404	497.478	25.1592	11.1	6.18349	1.26998	1051.69	4625.19	263.856	11.9692	306.431	15.7285
7000503101	PSP	45.8169	-72.9652	C	50	36	14	24	D	Mixed	Marine and littoral	Thick	Moderately well drained	3	1	1	1a	55.4389	146.144	211.994	2081.47	271.551	192.289	619.089	3097.79	15.4715	20.3529	126.404	497.478	25.1592	11.1	6.18349	1.26998	1051.69	4625.19	263.856	11.9692	306.431	15.7285
7000503102	PSP	45.8138	-72.9689	B	82	6	12	30	B	Deciduous	Marine and littoral	Thick	Moderately well drained	2	1	1	1a	44.4443	139.224	209.65	2044.28	267.327	188.731	627.817	3072	15.4233	20.0271	129.1	492.651	25.456	11.0862	6.01497	0.951653	1084.23	4651.89	275.701	12.2294	319.551	15.919
7000503102	PSP	45.8138	-72.9689	B	86	8	6	30	B	Deciduous	Marine and littoral	Thick	Moderately well drained	2	1	1	1a	44.4443	139.224	209.65	2044.28	267.327	188.731	627.817	3072	15.4233	20.0271	129.1	492.651	25.456	11.0862	6.01497	0.951653	1084.23	4651.89	275.701	12.2294	319.551	15.919
7000503102	PSP	45.8138	-72.9689	C	85	11	4	30	B	Deciduous	Marine and littoral	Thick	Moderately well drained	2	1	1	1a	44.4443	139.224	209.65	2044.28	267.327	188.731	627.817	3072	15.4233	20.0271	129.1	492.651	25.456	11.0862	6.01497	0.951653	1084.23	4651.89	275.701	12.2294	319.551	15.919
7000503102	PSP	45.8138	-72.9689	C	90	4	6	30	B	Deciduous	Marine and littoral	Thick	Moderately well drained	2	1	1	1a	44.4443	139.224	209.65	2044.28	267.327	188.731	627.817	3072	15.4233	20.0271	129.1	492.651	25.456	11.0862	6.01497	0.951653	1084.23	4651.89	275.701	12.2294	319.551	15.919
7000503102	PSP	45.8138	-72.9689	C	90	4	6	30	B	Deciduous	Marine and littoral	Thick	Moderately well drained	2	1	1	1a	44.4443	139.224	209.65	2044.28	267.327	188.731	627.817	3072	15.4233	20.0271	129.1	492.651	25.456	11.0862	6.01497	0.951653	1084.23	4651.89	275.701	12.2294	319.551	15.919
7000503202	PSP	45.8467	-72.4844	B	36	32	32	90	A	Deciduous	Marine and littoral	Thick	Moderately well drained	1	2	2east	2b	52.132	153.061	211.944	2102.5	277.527	190.378	618.763	3062.81	15.6564	20.6156	125.471	498.569	26.3635	11.1936	6.27879	1.51454	1072.81	4651.79	282.165	11.7536	315.758	15.2575
7000503202	PSP	45.8467	-72.4844	C	95	2	3	90	A	Deciduous	Marine and littoral	Thick	Moderately well drained	1	2	2east	2b	52.132	153.061	211.944	2102.5	277.527	190.378	618.763	3062.81	15.6564	20.6156	125.471	498.569	26.3635	11.1936	6.27879	1.51454	1072.81	4651.79	282.165	11.7536	315.758	15.2575
7000503301	PSP	45.8507	-72.7159	C	86	8	6	68	A	Coniferous	Marine and littoral	Thick	Poorly drained	2	2	2east	2b	47.7212	138.422	206.91	2043.23	267.688	185.445	598.291	3042.25	15.5921	20.2082	130.262	491.238	25.5226	11.1036	5.87664	0.56777	1039.01	4686.72	265.001	12.6769	310.049	16.322
7000503401	PSP	45.9	-73.0667	B	69	24	7	23	A	Coniferous	Marine and littoral	Thick	Moderately well drained	2	1	1	1a	57.7832	144.555	209.495	2077.74	270.691	189.659	599.544	3094.61	15.5818	20.4594	127.141	496.007	25.6875	11.2176	6.1201	1.01444	1036.65	4677.16	265.919	12.3806	302.088	16.2674
7000503401	PSP	45.9	-73.0667	C	47	36	17	23	A	Coniferous	Marine and littoral	Thick	Moderately well drained	2	1	1	1a	57.7832	144.555	209.495	2077.74	270.691	189.659	599.544	3094.61	15.5818	20.4594	127.141	496.007	25.6875	11.2176	6.1201	1.01444	1036.65	4677.16	265.919	12.3806	302.088	16.2674
7000503402	PSP	45.8961	-73.067	B	45	22	33	25	A	Coniferous	Marine and littoral	Thick	Somewhat poorly drained	6	1	1	1a	57.7832	144.555	209.495	2077.74	270.691	189.659	599.544	3094.61	15.5818	20.4594	127.141	496.007	25.6875	11.2176	6.1201	1.01444	1036.65	4677.16	265.919	12.3806	302.088	16.2674
7000503402	PSP	45.8961	-73.067	C	39	30	31	25	A	Coniferous	Marine and littoral	Thick	Somewhat poorly drained	6	1	1	1a	57.7832	144.555	209.495	2077.74	270.691	189.659	599.544	3094.61	15.5818	20.4594	127.141	496.007	25.6875	11.2176	6.1201	1.01444	1036.65	4677.16	265.919	12.3806	302.088	16.2674
7000503501	PSP	45.8999	-73.1824	B	81	12	7	20	A	Deciduous	Marine and littoral	Thick	Moderately well drained	2	1	1	1a	73.9922	154.847	213.055	2127.52	276.75	193.887	581.36	3124.39	15.6533	20.8467	122.903	502.353	25.6668	11.243	6.3655	1.44707	994.728	4645.68	254.638	12.0063	283.547	15.9166
7000503501	PSP	45.8999	-73.1824	C	98	2	0	20	A	Deciduous	Marine and littoral	Thick	Moderately well drained	2	1	1	1a	73.9922	154.847	213.055	2127.52	276.75	193.887	581.36	3124.39	15.6533	20.8467	122.903	502.353	25.6668	11.243	6.3655	1.44707	994.728	4645.68	254.638	12.0063	283.547	15.9166
7000503601	PSP	45.9837	-72.382	B	46	32	22	111	A	Deciduous	Marine and littoral	Thick	Moderately well drained	2	2	2east	2b	52.4757	137.461	201.479	1924.82	267.752	179.53	564.582	3016.13	15.2677	19.7249	131.288	477.108	27.7792	10.5968	5.32139	0.0405305	1035.07	4775.91	287.518	12.3822	300.381	15.9009
7000503602	PSP	45.9868	-72.3789	B	49	26	25	102	A	Deciduous	Marine and littoral	Medium	Poorly drained	2	2	2east	2b	52.5245	137.401	203.331	1957.03	267.821	185.044	585.667	3062.98	15.1602	19.8465	131.416	480.573	27.3083	10.7062	5.48105	0.0710045	1038.81	4747.16	283.985	12.3577	305.913	15.8574
7000503602	PSP	45.9868	-72.3789	C	80	12	8	102	A	Deciduous	Marine and littoral	Medium	Poorly drained	2	2	2east	2b	52.5245	137.401	203.331	1957.03	267.821	185.044	585.667	3062.98	15.1602	19.8465	131.416	480.573	27.3083	10.7062	5.48105	0.0710045	1038.81	4747.16	283.985	12.3577	305.913	15.8574
7000503701	PSP	46.0169	-72.5984	B	80	10	10	60	A	Coniferous	Marine and littoral	Thick	Somewhat poorly drained	2	2	2east	2b	60.1159	136.595	203.363	1953.94	266.785	184.252	570.728	3072.63	15.2139	19.9638	131.19	480.213	28.1375	10.5595	5.35432	0.0594767	1036.61	4748.38	291.401	12.3457	289.334	16.0412
7000503701	PSP	46.0169	-72.5984	C	57	30	13	60	A	Coniferous	Marine and littoral	Thick	Somewhat poorly drained	2	2	2east	2b	60.1159	136.595	203.363	1953.94	266.785	184.252	570.728	3072.63	15.2139	19.9638	131.19	480.213	28.1375	10.5595	5.35432	0.0594767	1036.61	4748.38	291.401	12.3457	289.334	16.0412
7000503702	PSP	46.0198	-72.5955	B	71	14	15	60	D	Deciduous	Marine and littoral	Thick	Well drained	2	2	2east	2b	61.1369	135.471	203.021	1951.78	266.085	184.379	567.444	3071.34	15.1966	19.9663	131.613	479.534	28.1103	10.5099	5.29942	-0.00339502	1030.33	4745.02	289.229	12.4095	287.055	16.1344
7000503801	PSP	46.0333	-72.6168	B	92	3	5	53	C	Deciduous	Marine and littoral	Thick	Somewhat poorly drained	2	2	2east	2b	61.6116	136.021	202.811	1944.24	266.341	183.985	563.94	3073.58	15.1864	19.9153	131.318	479.019	28.1856	10.4969	5.27162	0.0683756	1025.95	4747.78	288.956	12.3711	284.421	16.1414
7000503801	PSP	46.0333	-72.6168	C	93	3	4	53	C	Deciduous	Marine and littoral	Thick	Somewhat poorly drained	2	2	2east	2b	61.6116	136.021	202.811	1944.24	266.341	183.985	563.94	3073.58	15.1864	19.9153	131.318	479.019	28.1856	10.4969	5.27162	0.0683756	1025.95	4747.78	288.956	12.3711	284.421	16.1414
7000503802	PSP	46.0303	-72.6168	B	74	8	18	53	A	Mixed	Marine and littoral	Thick	Somewhat poorly drained	2	2	2east	2b	61.6116	136.021	202.811	1944.24	266.341	183.985	563.94	3073.58	15.1864	19.9153	131.318	479.019	28.1856	10.4969	5.27162	0.0683756	1025.95	4747.78	288.956	12.3711	284.421	16.1414
7000503802	PSP	46.0303	-72.6168	C	89	4	7	53	A	Mixed	Marine and littoral	Thick	Somewhat poorly drained	2	2	2east	2b	61.6116	136.021	202.811	1944.24	266.341	183.985	563.94	3073.58	15.1864	19.9153	131.318	479.019	28.1856	10.4969	5.27162	0.0683756	1025.95	4747.78	288.956	12.3711	284.421	16.1414
7000503901	PSP	46.0664	-72.8989	B	93	4	3	6	A	Deciduous	Marine and littoral	Thick	Poorly drained	4	1	1	1a	65.4032	161.411	215.494	2136.2	281.45	197.074	588.421	3111.34	15.5449	20.6704	121.04	503.911	25.2925	11.0568	6.35417	1.64843	975.436	4577.84	246.169	11.4162	289.147	14.8993
7000503901	PSP	46.0664	-72.8989	C	70	26	4	6	A	Deciduous	Marine and littoral	Thick	Poorly drained	4	1	1	1a	65.4032	161.411	215.494	2136.2	281.45	197.074	588.421	3111.34	15.5449	20.6704	121.04	503.911	25.2925	11.0568	6.35417	1.64843	975.436	4577.84	246.169	11.4162	289.147	14.8993
7000503902	PSP	46.0702	-72.8988	B	72	19	9	6	A	Deciduous	Marine and littoral	Thick	Poorly drained	5	1	1	1a	66.4236	162.923	215.974	2138.07	282.401	197.581	589.45	3110.64	15.5365	20.6582	120.478	504.371	25.0683	11.0366	6.38035	1.70565	972.088	4571.51	242.992	11.3001	288.826	14.732
7000503902	PSP	46.0702	-72.8988	C	82	14	4	6	A	Deciduous	Marine and littoral	Thick	Poorly drained	5	1	1	1a	66.4236	162.923	215.974	2138.07	282.401	197.581	589.45	3110.64	15.5365	20.6582	120.478	504.371	25.0683	11.0366	6.38035	1.70565	972.088	4571.51	242.992	11.3001	288.826	14.732
7000501401	PSP	45.2667	-72.8829	C	83	12	5	80	A	Deciduous	Marine and littoral	Thick	Moderately well drained	1	1	1	1a	33.4099	142.926	213.59	2121.37	270.874	190.013	664.006	3079.4	15.6775	20.4091	128.947	501.825	24.8032	11.6901	6.50954	1.33651	1148.13	4682	284.532	12.3151	333.971	16.0355
7000501402	PSP	45.2682	-72.8881	B	51	29	20	80	A	Deciduous	Glacial without particular morphology	Medium	Moderately well drained	3	1	1	1a	34.6716	143.579	214.189	2132.31	271.336	190.337	657.222	3074.65	15.7134	20.4656	128.755	503.058	24.6006	11.6936	6.56661	1.33126	1132.4	4675.08	277.443	12.3256	328.295	16.0411
7000501402	PSP	45.2682	-72.8881	C	82	11	7	80	A	Deciduous	Glacial without particular morphology	Medium	Moderately well drained	3	1	1	1a	34.6716	143.579	214.189	2132.31	271.336	190.337	657.222	3074.65	15.7134	20.4656	128.755	503.058	24.6006	11.6936	6.56661	1.33126	1132.4	4675.08	277.443	12.3256	328.295	16.0411
7000501501	PSP	45.3167	-72.7997	B	48	35	17	100	B	Deciduous	Glacial without particular morphology	Medium	Moderately well drained	2	2	2east	2c	32.1409	143.91	213.001	2104.62	272.622	189.317	671.018	3055.06	15.6232	20.3277	129.712	499.474	25.4222	11.5154	6.43975	1.37729	1169.39	4681.28	296.9	12.0458	340.392	15.5918
7000501502	PSP	45.3137	-72.7963	B	38	33	29	103	D	Deciduous	Glacial without particular morphology	Thin to very thin	Somewhat excessively drained	0	2	2east	2c	32.1409	143.91	213.001	2104.62	272.622	189.317	671.018	3055.06	15.6232	20.3277	129.712	499.474	25.4222	11.5154	6.43975	1.37729	1169.39	4681.28	296.9	12.0458	340.392	15.5918
7000501601	PSP	45.35	-73.1166	B	55	25	20	53	A	Deciduous	Glacial without particular morphology	Thick	Somewhat poorly drained	6	1	1	1a	41.741	149.778	215.052	2163	274.908	191.394	645.484	3081.18	15.8622	20.7229	126.131	506.86	24.3636	11.6689	6.67265	1.68193	1101.29	4660.19	268.187	12.1885	322.118	15.9733
7000501601	PSP	45.35	-73.1166	C	59	26	15	53	A	Deciduous	Glacial without particular morphology	Thick	Somewhat poorly drained	6	1	1	1a	41.741	149.778	215.052	2163	274.908	191.394	645.484	3081.18	15.8622	20.7229	126.131	506.86	24.3636	11.6689	6.67265	1.68193	1101.29	4660.19	268.187	12.1885	322.118	15.9733
7000501602	PSP	45.3539	-73.1166	B	60	22	18	51	A	Deciduous	Glacial without particular morphology	Thick	Somewhat poorly drained	5	1	1	1a	43.3847	149.523	214.662	2164.4	274.678	191.183	637.942	3089.22	15.8834	20.6949	126.154	507.074	24.3382	11.7198	6.68232	1.65403	1087.96	4671.62	263.871	12.3195	316.485	16.1223
7000501602	PSP	45.3539	-73.1166	C	74	16	10	51	A	Deciduous	Glacial without particular morphology	Thick	Somewhat poorly drained	5	1	1	1a	43.3847	149.523	214.662	2164.4	274.678	191.183	637.942	3089.22	15.8834	20.6949	126.154	507.074	24.3382	11.7198	6.68232	1.65403	1087.96	4671.62	263.871	12.3195	316.485	16.1223
7000501801	PSP	45.4	-72.5661	B	59	28	13	200	C	Mixed	Glacial without particular morphology	Medium	Moderately well drained	2	2	2east	2c	20.747	114.682	195.177	1805.67	260.935	170.608	654.002	2913.74	14.8915	18.9616	147.251	463.573	28.4076	10.7451	5.02797	-0.668421	1265.7	4879.08	359.038	12.5561	378.954	15.9427
7000501801	PSP	45.4	-72.5661	C	43	38	19	200	C	Mixed	Glacial without particular morphology	Medium	Moderately well drained	2	2	2east	2c	20.747	114.682	195.177	1805.67	260.935	170.608	654.002	2913.74	14.8915	18.9616	147.251	463.573	28.4076	10.7451	5.02797	-0.668421	1265.7	4879.08	359.038	12.5561	378.954	15.9427
7000501802	PSP	45.4012	-72.561	B	35	38	27	200	A	Mixed	Glacial without particular morphology	Thick	Poorly drained	8	2	2east	2c	21.515	115.114	197.273	1845.09	261.02	173.121	651.641	2928.62	14.9866	19.1275	146.902	467.583	28.1856	10.7719	5.178	-0.697321	1250.03	4851.08	351.531	12.6411	370.511	15.998
7000501802	PSP	45.4012	-72.561	C	45	29	26	200	A	Mixed	Glacial without particular morphology	Thick	Poorly drained	8	2	2east	2c	21.515	115.114	197.273	1845.09	261.02	173.121	651.641	2928.62	14.9866	19.1275	146.902	467.583	28.1856	10.7719	5.178	-0.697321	1250.03	4851.08	351.531	12.6411	370.511	15.998
7000501802	PSP	45.4012	-72.561	C	46	33	21	200	A	Mixed	Glacial without particular morphology	Thick	Poorly drained	8	2	2east	2c	21.515	115.114	197.273	1845.09	261.02	173.121	651.641	2928.62	14.9866	19.1275	146.902	467.583	28.1856	10.7719	5.178	-0.697321	1250.03	4851.08	351.531	12.6411	370.511	15.998
7000502001	PSP	45.4331	-72.6991	B	54	29	17	130	A	Deciduous	Glacial without particular morphology	Thick	Moderately well drained	2	2	2east	2c	30.9919	145.239	210.341	2034.8	274.463	184.871	660.071	3008.09	15.4611	20.0199	130.218	490.589	27.0844	11.0912	6.11995	1.28566	1193.77	4721.14	323.493	11.5858	352.661	14.8253
7000502001	PSP	45.4331	-72.6991	C	89	8	3	130	A	Deciduous	Glacial without particular morphology	Thick	Moderately well drained	2	2	2east	2c	30.9919	145.239	210.341	2034.8	274.463	184.871	660.071	3008.09	15.4611	20.0199	130.218	490.589	27.0844	11.0912	6.11995	1.28566	1193.77	4721.14	323.493	11.5858	352.661	14.8253
7000502002	PSP	45.432	-72.6939	B	25	50	25	159	A	Deciduous	Glacial without particular morphology	Medium	Somewhat poorly drained	2	2	2east	2c	30.9919	145.239	210.341	2034.8	274.463	184.871	660.071	3008.09	15.4611	20.0199	130.218	490.589	27.0844	11.0912	6.11995	1.28566	1193.77	4721.14	323.493	11.5858	352.661	14.8253
7000502002	PSP	45.432	-72.6939	C	37	45	18	159	A	Deciduous	Glacial without particular morphology	Medium	Somewhat poorly drained	2	2	2east	2c	30.9919	145.239	210.341	2034.8	274.463	184.871	660.071	3008.09	15.4611	20.0199	130.218	490.589	27.0844	11.0912	6.11995	1.28566	1193.77	4721.14	323.493	11.5858	352.661	14.8253
7000502101	PSP	45.5168	-72.7323	B	43	26	31	94	A	Coniferous	Glacial without particular morphology	Thick	Somewhat poorly drained	5	2	2east	2b	40.549	144.238	211.328	2090.76	272.626	188.069	611.629	3046.72	15.6467	20.3172	129.395	497.084	26.0286	11.3536	6.27418	1.1906	1080.27	4682.72	282.045	12.1396	327.129	15.6485
7000502101	PSP	45.5168	-72.7323	B	44	22	34	94	A	Coniferous	Glacial without particular morphology	Thick	Somewhat poorly drained	5	2	2east	2b	40.549	144.238	211.328	2090.76	272.626	188.069	611.629	3046.72	15.6467	20.3172	129.395	497.084	26.0286	11.3536	6.27418	1.1906	1080.27	4682.72	282.045	12.1396	327.129	15.6485
7000502101	PSP	45.5168	-72.7323	B	44	22	34	94	A	Coniferous	Glacial without particular morphology	Thick	Somewhat poorly drained	5	2	2east	2b	40.549	144.238	211.328	2090.76	272.626	188.069	611.629	3046.72	15.6467	20.3172	129.395	497.084	26.0286	11.3536	6.27418	1.1906	1080.27	4682.72	282.045	12.1396	327.129	15.6485
7000502101	PSP	45.5168	-72.7323	C	38	30	32	94	A	Coniferous	Glacial without particular morphology	Thick	Somewhat poorly drained	5	2	2east	2b	40.549	144.238	211.328	2090.76	272.626	188.069	611.629	3046.72	15.6467	20.3172	129.395	497.084	26.0286	11.3536	6.27418	1.1906	1080.27	4682.72	282.045	12.1396	327.129	15.6485
7000502102	PSP	45.5207	-72.7322	B	68	21	11	98	B	Mixed	Glacial without particular morphology	Thick	Well drained	2	2	2east	2b	39.2328	142.395	210.531	2071.21	271.811	186.86	608.286	3042.55	15.5997	20.2128	130.415	494.97	26.1148	11.3153	6.19573	1.11856	1081.12	4691.56	283.676	12.1596	329.042	15.7058
7000502102	PSP	45.5207	-72.7322	C	62	24	14	98	B	Mixed	Glacial without particular morphology	Thick	Well drained	2	2	2east	2b	39.2328	142.395	210.531	2071.21	271.811	186.86	608.286	3042.55	15.5997	20.2128	130.415	494.97	26.1148	11.3153	6.19573	1.11856	1081.12	4691.56	283.676	12.1596	329.042	15.7058
7000502201	PSP	45.5324	-72.3002	B	60	31	9	286	D	Deciduous	Glacial without particular morphology	Medium	Moderately well drained	2	2	2east	2c	26.8302	121.757	195.233	1748.48	262.111	171.194	624.531	2902.99	14.6274	18.5802	141.353	455.844	29.8717	9.91334	4.74985	-0.424175	1211.93	4840.58	361.978	11.3682	358.506	14.2716
7000502201	PSP	45.5324	-72.3002	C	55	36	9	286	D	Deciduous	Glacial without particular morphology	Medium	Moderately well drained	2	2	2east	2c	26.8302	121.757	195.233	1748.48	262.111	171.194	624.531	2902.99	14.6274	18.5802	141.353	455.844	29.8717	9.91334	4.74985	-0.424175	1211.93	4840.58	361.978	11.3682	358.506	14.2716
7000502202	PSP	45.5287	-72.3	B	46	38	16	274	C	Deciduous	Glacial without particular morphology	Medium	Moderately well drained	2	2	2east	2c	26.8302	121.757	195.233	1748.48	262.111	171.194	624.531	2902.99	14.6274	18.5802	141.353	455.844	29.8717	9.91334	4.74985	-0.424175	1211.93	4840.58	361.978	11.3682	358.506	14.2716
7000502301	PSP	45.55	-72.4157	B	47	32	21	195	B	Deciduous	Glacial without particular morphology	Thick	Somewhat poorly drained	2	2	2east	2c	32.3776	124.935	198.952	1824.24	262.921	174.704	593.713	2939	14.867	19.0154	138.987	465.189	28.6196	10.3214	5.07908	-0.163378	1125.98	4791.51	322.494	11.7496	335.886	14.8877
7000502301	PSP	45.55	-72.4157	C	62	28	10	195	B	Deciduous	Glacial without particular morphology	Thick	Somewhat poorly drained	2	2	2east	2c	32.3776	124.935	198.952	1824.24	262.921	174.704	593.713	2939	14.867	19.0154	138.987	465.189	28.6196	10.3214	5.07908	-0.163378	1125.98	4791.51	322.494	11.7496	335.886	14.8877
7000502302	PSP	45.5489	-72.4207	B	66	25	9	197	A	Mixed	Glacial without particular morphology	Thick	Somewhat poorly drained	5	2	2east	2c	31.7146	124.417	198.562	1819.68	262.845	174.253	596.404	2934.42	14.8635	19.012	139.43	464.6	28.6804	10.3131	5.05681	-0.199247	1133.47	4797.03	325.366	11.7524	338.446	14.8809
7000502302	PSP	45.5489	-72.4207	C	55	34	11	197	A	Mixed	Glacial without particular morphology	Thick	Somewhat poorly drained	5	2	2east	2c	31.7146	124.417	198.562	1819.68	262.845	174.253	596.404	2934.42	14.8635	19.012	139.43	464.6	28.6804	10.3131	5.05681	-0.199247	1133.47	4797.03	325.366	11.7524	338.446	14.8809
7000502401	PSP	45.5496	-73.1665	B	61	32	7	273	B	Deciduous	Glacial without particular morphology	Medium	Moderately well drained	2	1	1	1a	42.609	140.842	205.367	2024.34	270.335	185.407	638.542	3065.26	15.5068	20.1794	130.513	488.913	26.8176	11.2439	6.04676	0.648887	1134.35	4798.94	303.713	12.3877	326.599	15.8025
7000502401	PSP	45.5496	-73.1665	C	61	30	9	273	B	Deciduous	Glacial without particular morphology	Medium	Moderately well drained	2	1	1	1a	42.609	140.842	205.367	2024.34	270.335	185.407	638.542	3065.26	15.5068	20.1794	130.513	488.913	26.8176	11.2439	6.04676	0.648887	1134.35	4798.94	303.713	12.3877	326.599	15.8025
7000502402	PSP	45.5488	-73.1715	B	62	35	3	372	E	Deciduous	Glacial without particular morphology	Medium	Moderately well drained	2	1	1	1a	36.5613	135.549	199.348	1917.89	268.48	180.053	651.251	3061.59	15.205	19.8753	133.906	475.943	28.5902	10.8744	5.4967	0.365142	1205.74	4921.53	347.516	12.1571	342.739	15.6373
7000502402	PSP	45.5488	-73.1715	C	65	30	5	372	E	Deciduous	Glacial without particular morphology	Medium	Moderately well drained	2	1	1	1a	36.5613	135.549	199.348	1917.89	268.48	180.053	651.251	3061.59	15.205	19.8753	133.906	475.943	28.5902	10.8744	5.4967	0.365142	1205.74	4921.53	347.516	12.1571	342.739	15.6373
7000502501	PSP	45.5504	-73.3164	B	77	18	5	146	D	Deciduous	Glacial without particular morphology	Medium	Well drained	2	1	1	1a	58.3516	163.821	222.347	2186.81	282.236	197.376	625.748	3039.86	15.7208	21.0494	119.434	509.638	26.2256	11.1692	6.994	2.73057	1091.3	4492.43	285.877	10.2591	305.187	13.6362
7000502501	PSP	45.5504	-73.3164	C	88	11	1	146	D	Deciduous	Glacial without particular morphology	Medium	Well drained	2	1	1	1a	58.3516	163.821	222.347	2186.81	282.236	197.376	625.748	3039.86	15.7208	21.0494	119.434	509.638	26.2256	11.1692	6.994	2.73057	1091.3	4492.43	285.877	10.2591	305.187	13.6362
7000502502	PSP	45.5494	-73.3112	B	81	16	3	133	C	Deciduous	Glacial without particular morphology	Medium	Well drained	2	1	1	1a	58.3516	163.821	222.347	2186.81	282.236	197.376	625.748	3039.86	15.7208	21.0494	119.434	509.638	26.2256	11.1692	6.994	2.73057	1091.3	4492.43	285.877	10.2591	305.187	13.6362
7000502502	PSP	45.5494	-73.3112	C	89	10	1	133	C	Deciduous	Glacial without particular morphology	Medium	Well drained	2	1	1	1a	58.3516	163.821	222.347	2186.81	282.236	197.376	625.748	3039.86	15.7208	21.0494	119.434	509.638	26.2256	11.1692	6.994	2.73057	1091.3	4492.43	285.877	10.2591	305.187	13.6362
7000502601	PSP	45.6002	-72.8661	B	43	34	23	61	B	Deciduous	Marine and littoral	Thin to very thin	Moderately well drained	0	2	2east	2b	49.8148	148.411	212.457	2126.1	274.05	189.873	609.007	3077.34	15.7708	20.504	126.641	501.401	26.0464	11.407	6.3901	1.37631	1066.7	4673.12	277.867	12.2277	313.618	15.8432
7000502602	PSP	45.5973	-72.8624	B	55	28	17	64	A	Deciduous	Marine and littoral	Medium	Moderately well drained	1	2	2east	2b	49.8148	148.411	212.457	2126.1	274.05	189.873	609.007	3077.34	15.7708	20.504	126.641	501.401	26.0464	11.407	6.3901	1.37631	1066.7	4673.12	277.867	12.2277	313.618	15.8432
7000502602	PSP	45.5973	-72.8624	C	59	24	17	64	A	Deciduous	Marine and littoral	Medium	Moderately well drained	1	2	2east	2b	49.8148	148.411	212.457	2126.1	274.05	189.873	609.007	3077.34	15.7708	20.504	126.641	501.401	26.0464	11.407	6.3901	1.37631	1066.7	4673.12	277.867	12.2277	313.618	15.8432
7000502701	PSP	45.6503	-73.2663	B	95	2	3	41	A	Mixed	Marine and littoral	Thick	Moderately well drained	1	1	1	1a	63.0887	149.298	210.208	2130.16	274.866	188.682	574.919	3082.14	15.8872	20.6564	126.568	502.107	25.633	11.5653	6.4353	1.30378	999.234	4708.1	255.574	12.5851	287.788	16.5557
7000502701	PSP	45.6503	-73.2663	C	29	35	36	41	A	Mixed	Marine and littoral	Thick	Moderately well drained	1	1	1	1a	63.0887	149.298	210.208	2130.16	274.866	188.682	574.919	3082.14	15.8872	20.6564	126.568	502.107	25.633	11.5653	6.4353	1.30378	999.234	4708.1	255.574	12.5851	287.788	16.5557
7000504001	PSP	46.0841	-72.2651	B	92	5	3	90	B	Mixed	Marine and littoral	Thick	Poorly drained	2	2	2east	2b	46.1808	122.389	195.011	1844.39	260.236	172.263	542.602	2934.79	15.1471	19.2183	138.848	467.566	26.6175	10.5054	4.90578	-0.730682	997.014	4779.13	265.865	12.8271	302.814	16.2298
7000504001	PSP	46.0841	-72.2651	C	44	32	24	90	B	Mixed	Marine and littoral	Thick	Poorly drained	2	2	2east	2b	46.1808	122.389	195.011	1844.39	260.236	172.263	542.602	2934.79	15.1471	19.2183	138.848	467.566	26.6175	10.5054	4.90578	-0.730682	997.014	4779.13	265.865	12.8271	302.814	16.2298
7000504002	PSP	46.0871	-72.2617	B	90	4	6	97	A	Coniferous	Marine and littoral	Thick	Somewhat poorly drained	4	2	2east	2b	46.1808	122.389	195.011	1844.39	260.236	172.263	542.602	2934.79	15.1471	19.2183	138.848	467.566	26.6175	10.5054	4.90578	-0.730682	997.014	4779.13	265.865	12.8271	302.814	16.2298
7000504002	PSP	46.0871	-72.2617	C	96	0	4	97	A	Coniferous	Marine and littoral	Thick	Somewhat poorly drained	4	2	2east	2b	46.1808	122.389	195.011	1844.39	260.236	172.263	542.602	2934.79	15.1471	19.2183	138.848	467.566	26.6175	10.5054	4.90578	-0.730682	997.014	4779.13	265.865	12.8271	302.814	16.2298
7000504101	PSP	46.1004	-72.4494	B	86	8	6	71	A	Deciduous	Marine and littoral	Thick	Somewhat poorly drained	2	2	2east	2b	58.0152	130.105	198.885	1879.55	263.312	179.778	536.258	3037.14	15.0381	19.5064	134.205	471.972	27.1341	10.4584	5.03674	-0.390474	969.75	4763.32	262.94	12.6297	280.066	16.2239
7000504101	PSP	46.1004	-72.4494	C	68	24	8	71	A	Deciduous	Marine and littoral	Thick	Somewhat poorly drained	2	2	2east	2b	58.0152	130.105	198.885	1879.55	263.312	179.778	536.258	3037.14	15.0381	19.5064	134.205	471.972	27.1341	10.4584	5.03674	-0.390474	969.75	4763.32	262.94	12.6297	280.066	16.2239
7000504102	PSP	46.1036	-72.4526	B	81	8	11	70	B	Deciduous	Marine and littoral	Thick	Moderately well drained	2	2	2east	2b	58.0371	130.962	199.273	1890.94	263.549	179.803	537.509	3028.38	15.0917	19.5496	133.586	473.08	27.1906	10.4761	5.07781	-0.350874	971.986	4758.22	264.586	12.6202	282.687	16.19
7000504102	PSP	46.1036	-72.4526	B	93	1	6	70	B	Deciduous	Marine and littoral	Thick	Moderately well drained	2	2	2east	2b	58.0371	130.962	199.273	1890.94	263.549	179.803	537.509	3028.38	15.0917	19.5496	133.586	473.08	27.1906	10.4761	5.07781	-0.350874	971.986	4758.22	264.586	12.6202	282.687	16.19
7000504102	PSP	46.1036	-72.4526	B	92	2	6	70	B	Deciduous	Marine and littoral	Thick	Moderately well drained	2	2	2east	2b	58.0371	130.962	199.273	1890.94	263.549	179.803	537.509	3028.38	15.0917	19.5496	133.586	473.08	27.1906	10.4761	5.07781	-0.350874	971.986	4758.22	264.586	12.6202	282.687	16.19
7000504102	PSP	46.1036	-72.4526	C	60	28	12	70	B	Deciduous	Marine and littoral	Thick	Moderately well drained	2	2	2east	2b	58.0371	130.962	199.273	1890.94	263.549	179.803	537.509	3028.38	15.0917	19.5496	133.586	473.08	27.1906	10.4761	5.07781	-0.350874	971.986	4758.22	264.586	12.6202	282.687	16.19
7000504102	PSP	46.1036	-72.4526	C	96	0	4	70	B	Deciduous	Marine and littoral	Thick	Moderately well drained	2	2	2east	2b	58.0371	130.962	199.273	1890.94	263.549	179.803	537.509	3028.38	15.0917	19.5496	133.586	473.08	27.1906	10.4761	5.07781	-0.350874	971.986	4758.22	264.586	12.6202	282.687	16.19
7000504102	PSP	46.1036	-72.4526	C	94	2	4	70	B	Deciduous	Marine and littoral	Thick	Moderately well drained	2	2	2east	2b	58.0371	130.962	199.273	1890.94	263.549	179.803	537.509	3028.38	15.0917	19.5496	133.586	473.08	27.1906	10.4761	5.07781	-0.350874	971.986	4758.22	264.586	12.6202	282.687	16.19
7000504202	PSP	46.1494	-72.5882	B	84	9	7	40	B	Deciduous	Marine and littoral	Thick	Moderately well drained	2	2	2east	2b	60.7854	142.696	203.293	1937.99	269.661	183.431	542.868	3046.63	15.2041	19.7756	127.961	479.509	27.2758	10.5298	5.33559	0.126422	966.56	4724.47	263.354	12.339	281.095	15.8832
7000504202	PSP	46.1494	-72.5882	C	92	5	3	40	B	Deciduous	Marine and littoral	Thick	Moderately well drained	2	2	2east	2b	60.7854	142.696	203.293	1937.99	269.661	183.431	542.868	3046.63	15.2041	19.7756	127.961	479.509	27.2758	10.5298	5.33559	0.126422	966.56	4724.47	263.354	12.339	281.095	15.8832
7000600201	PSP	46.467	-70.1167	B	34	38	28	390	A	Coniferous	Glacial without particular morphology	Thick	Somewhat poorly drained	6	3	3east	3d	19.7517	101.562	174.949	1488.48	252.751	153.498	570.214	2749.91	14.0767	17.2941	152.191	422.635	34.4328	8.72952	3.21577	-2.29339	1211.49	4999.47	416.341	12.0823	365.942	14.7705
7000600201	PSP	46.467	-70.1167	C	35	31	34	390	A	Coniferous	Glacial without particular morphology	Thick	Somewhat poorly drained	6	3	3east	3d	19.7517	101.562	174.949	1488.48	252.751	153.498	570.214	2749.91	14.0767	17.2941	152.191	422.635	34.4328	8.72952	3.21577	-2.29339	1211.49	4999.47	416.341	12.0823	365.942	14.7705
7000600202	PSP	46.4637	-70.1197	B	61	29	10	392	A	Coniferous	Glacial without particular morphology	Thick	Moderately well drained	2	3	3east	3d	19.532	101.965	175.219	1481.2	252.992	153.689	572.458	2744.55	14.023	17.2532	152.028	421.831	34.2997	8.62851	3.17352	-2.27794	1210.82	4988.73	413.991	11.9504	366.59	14.6135
7000600202	PSP	46.4637	-70.1197	C	46	31	23	392	A	Coniferous	Glacial without particular morphology	Thick	Moderately well drained	2	3	3east	3d	19.532	101.965	175.219	1481.2	252.992	153.689	572.458	2744.55	14.023	17.2532	152.028	421.831	34.2997	8.62851	3.17352	-2.27794	1210.82	4988.73	413.991	11.9504	366.59	14.6135
7000600402	PSP	46.5197	-71.3867	B	92	5	3	128	A	Coniferous	Marine and littoral	Thick	Somewhat poorly drained	4	2	2east	2b	25.7834	127.447	193.309	1783.29	264.492	174.618	630.991	2902.21	14.8228	19.146	138.044	458.836	29.4048	9.82464	4.62989	-0.559204	1161.81	4734.95	340.548	12.1238	350.491	15.369
7000600402	PSP	46.5197	-71.3867	C	86	10	4	128	A	Coniferous	Marine and littoral	Thick	Somewhat poorly drained	4	2	2east	2b	25.7834	127.447	193.309	1783.29	264.492	174.618	630.991	2902.21	14.8228	19.146	138.044	458.836	29.4048	9.82464	4.62989	-0.559204	1161.81	4734.95	340.548	12.1238	350.491	15.369
7000600501	PSP	46.5166	-71.5656	B	35	29	36	136	A	Mixed	Marine and littoral	Thick	Somewhat poorly drained	6	2	2east	2b	24.9921	122.332	190.823	1749.77	261.402	171.809	624.229	2888.35	14.7489	18.9236	140.068	454.7	29.8185	9.71654	4.40359	-0.898618	1165.29	4762.66	347.572	12.1726	351.752	15.4275
7000600501	PSP	46.5166	-71.5656	C	59	21	20	136	A	Mixed	Marine and littoral	Thick	Somewhat poorly drained	6	2	2east	2b	24.9921	122.332	190.823	1749.77	261.402	171.809	624.229	2888.35	14.7489	18.9236	140.068	454.7	29.8185	9.71654	4.40359	-0.898618	1165.29	4762.66	347.572	12.1726	351.752	15.4275
7000600602	PSP	46.5306	-71.8288	B	68	15	17	77	A	Deciduous	Marine and littoral	Thick	Somewhat poorly drained	2	2	2east	2b	29.4204	129.459	195.454	1759.08	264.01	177.185	616.186	2921.12	14.5872	19.074	135.559	457.946	27.3535	9.71227	4.50312	-0.810695	1079.55	4685.69	295.725	12.0135	329.732	15.6342
7000600602	PSP	46.5306	-71.8288	C	78	18	4	77	A	Deciduous	Marine and littoral	Thick	Somewhat poorly drained	2	2	2east	2b	29.4204	129.459	195.454	1759.08	264.01	177.185	616.186	2921.12	14.5872	19.074	135.559	457.946	27.3535	9.71227	4.50312	-0.810695	1079.55	4685.69	295.725	12.0135	329.732	15.6342
7000600701	PSP	46.5496	-70.4324	B	48	44	8	564	C	Mixed	Slope and in situ weathered	Medium	Somewhat poorly drained	2	3	3east	3d	15.8284	108.382	179.087	1373.74	257.603	160.563	632.972	2801.14	13.0801	16.4672	150.223	410.358	35.7277	7.24519	2.61701	-1.93314	1278.9	4906.47	455.992	9.49228	387.763	11.7898
7000600702	PSP	46.5528	-70.429	B	58	22	20	590	B	Mixed	Glacial without particular morphology	Medium	Moderately well drained	3	3	3east	3d	14.22	103.655	175.229	1295.02	255.593	155.048	627.37	2734.73	12.8221	15.954	152.943	401.619	36.9365	6.81527	2.24174	-2.27793	1305.07	4942.49	480.688	9.1543	391.493	11.2481
7000600702	PSP	46.5528	-70.429	C	50	28	22	590	B	Mixed	Glacial without particular morphology	Medium	Moderately well drained	3	3	3east	3d	14.22	103.655	175.229	1295.02	255.593	155.048	627.37	2734.73	12.8221	15.954	152.943	401.619	36.9365	6.81527	2.24174	-2.27793	1305.07	4942.49	480.688	9.1543	391.493	11.2481
7000600801	PSP	46.5843	-70.4327	B	47	33	20	789	D	Coniferous	Slope and in situ weathered	Medium	Moderately well drained	3	3	3east	3d	12.4026	90.8609	165.493	1170.94	249.837	145.256	597.238	2646.81	12.4743	15.0962	159.993	385.164	39.1336	6.29347	1.51568	-3.20361	1339.38	5073.52	523.843	9.14262	399.263	10.9453
7000600801	PSP	46.5843	-70.4327	B	50	34	17	789	D	Coniferous	Slope and in situ weathered	Medium	Moderately well drained	3	3	3east	3d	12.4026	90.8609	165.493	1170.94	249.837	145.256	597.238	2646.81	12.4743	15.0962	159.993	385.164	39.1336	6.29347	1.51568	-3.20361	1339.38	5073.52	523.843	9.14262	399.263	10.9453
7000600801	PSP	46.5843	-70.4327	C	51	31	19	789	D	Coniferous	Slope and in situ weathered	Medium	Moderately well drained	3	3	3east	3d	12.4026	90.8609	165.493	1170.94	249.837	145.256	597.238	2646.81	12.4743	15.0962	159.993	385.164	39.1336	6.29347	1.51568	-3.20361	1339.38	5073.52	523.843	9.14262	399.263	10.9453
7000600801	PSP	46.5843	-70.4327	C	55	30	15	789	D	Coniferous	Slope and in situ weathered	Medium	Moderately well drained	3	3	3east	3d	12.4026	90.8609	165.493	1170.94	249.837	145.256	597.238	2646.81	12.4743	15.0962	159.993	385.164	39.1336	6.29347	1.51568	-3.20361	1339.38	5073.52	523.843	9.14262	399.263	10.9453
7000600802	PSP	46.5808	-70.4284	B	57	27	16	778	C	Coniferous	Slope and in situ weathered	Thin	Moderately well drained	3	3	3east	3d	11.6217	90.7241	164.564	1141.52	249.885	144.154	595.702	2625.82	12.3162	14.8873	160.157	382.095	39.4882	6.06806	1.36829	-3.26689	1347.08	5074.27	531.091	8.91237	402.043	10.6917
7000600802	PSP	46.5808	-70.4284	C	56	28	16	778	C	Coniferous	Slope and in situ weathered	Thin	Moderately well drained	3	3	3east	3d	11.6217	90.7241	164.564	1141.52	249.885	144.154	595.702	2625.82	12.3162	14.8873	160.157	382.095	39.4882	6.06806	1.36829	-3.26689	1347.08	5074.27	531.091	8.91237	402.043	10.6917
7000600901	PSP	46.5834	-71.4669	B	67	22	11	133	B	Mixed	Glacial without particular morphology	Medium	Moderately well drained	2	2	2east	2b	26.1041	128.895	194.52	1758.08	264.874	176.038	634.201	2891.17	14.631	19.0711	136.978	455.976	29.0426	9.49174	4.49868	-0.488465	1144.86	4682.22	332.306	11.4068	344.988	14.6446
7000601501	PSP	46.6674	-70.6496	C	54	27	19	396	C	Coniferous	Glacial without particular morphology	Medium	Somewhat poorly drained	2	3	3east	3d	19.0463	100.985	179.264	1441.11	254.585	157.99	607.02	2759.7	13.5468	16.9519	154.602	419.24	33.1206	8.05266	2.99588	-2.09183	1220.4	4891.23	403.28	10.5616	371.642	13.2646
7000601501	PSP	46.6674	-70.6496	C	54	29	18	396	C	Coniferous	Glacial without particular morphology	Medium	Somewhat poorly drained	2	3	3east	3d	19.0463	100.985	179.264	1441.11	254.585	157.99	607.02	2759.7	13.5468	16.9519	154.602	419.24	33.1206	8.05266	2.99588	-2.09183	1220.4	4891.23	403.28	10.5616	371.642	13.2646
7000601502	PSP	46.6662	-70.6548	B	42	33	25	388	B	Coniferous	Glacial without particular morphology	Medium	Moderately well drained	2	3	3east	3d	18.4147	100.092	178.612	1420.27	254.384	156.783	608.893	2744.6	13.4622	16.8287	155.291	417.094	33.3841	7.94484	2.9004	-2.15986	1231.8	4900.02	410.314	10.481	375.793	13.117
7000601502	PSP	46.6662	-70.6548	C	57	27	16	388	B	Coniferous	Glacial without particular morphology	Medium	Moderately well drained	2	3	3east	3d	18.4147	100.092	178.612	1420.27	254.384	156.783	608.893	2744.6	13.4622	16.8287	155.291	417.094	33.3841	7.94484	2.9004	-2.15986	1231.8	4900.02	410.314	10.481	375.793	13.117
7000601601	PSP	46.6685	-70.8492	B	37	36	27	238	C	Deciduous	Glacial without particular morphology	Medium	Moderately well drained	3	3	3east	3d	21.1153	117.341	182.876	1557.57	259.856	164.817	608.581	2822.78	13.9986	17.9269	143.514	431.388	30.8498	8.489	3.47974	-1.56916	1147.57	4829.08	354.15	11.088	363.264	13.8505
7000601601	PSP	46.6685	-70.8492	C	61	26	13	238	C	Deciduous	Glacial without particular morphology	Medium	Moderately well drained	3	3	3east	3d	21.1153	117.341	182.876	1557.57	259.856	164.817	608.581	2822.78	13.9986	17.9269	143.514	431.388	30.8498	8.489	3.47974	-1.56916	1147.57	4829.08	354.15	11.088	363.264	13.8505
7000601602	PSP	46.6694	-70.8537	B	37	34	29	219	C	Deciduous	Glacial without particular morphology	Thin	Moderately well drained	2	2	2east	2b	21.8196	119.451	184.358	1584.39	260.85	166.736	611.779	2844.85	14.0581	18.0586	142.399	434.505	30.643	8.60373	3.60421	-1.46185	1144.13	4817.74	351.36	11.1645	361.703	13.9824
7000601801	PSP	46.6843	-70.3008	B	55	36	9	613	D	Mixed	Glacial without particular morphology	Thin	Moderately well drained	2	3	3east	3d	15.6745	79.0949	167.714	1258.49	243.346	145.36	575.264	2647.3	12.9327	15.6565	165.254	397.624	37.4127	7.22192	2.05119	-3.27195	1302.26	5067.08	486.535	10.4116	384.515	12.6614
7000601802	PSP	46.6828	-70.2955	B	33	31	36	613	A	Mixed	Glacial without particular morphology	Thick	Moderately well drained	2	3	3east	3d	17.022	80.3497	167.855	1285.98	243.649	143.449	564.554	2624.21	13.1475	15.8391	164.302	401.787	36.8906	7.62266	2.24411	-3.01639	1288.05	5072.03	474.422	10.6284	377.223	13.0573
7000601802	PSP	46.6828	-70.2955	C	41	35	24	613	A	Mixed	Glacial without particular morphology	Thick	Moderately well drained	2	3	3east	3d	17.022	80.3497	167.855	1285.98	243.649	143.449	564.554	2624.21	13.1475	15.8391	164.302	401.787	36.8906	7.62266	2.24411	-3.01639	1288.05	5072.03	474.422	10.6284	377.223	13.0573
7000601901	PSP	46.7009	-70.1487	B	46	32	22	417	A	Coniferous	Glacial without particular morphology	Thick	Somewhat poorly drained	2	3	3east	3d	20.2514	83.3446	170.804	1405.87	242.929	148.262	556.79	2670.14	13.7493	16.7629	160.582	414.349	35.0463	8.42937	2.78021	-2.9184	1229.2	5005.82	429.612	11.7909	364.181	14.5874
7000601901	PSP	46.7009	-70.1487	C	34	32	34	417	A	Coniferous	Glacial without particular morphology	Thick	Somewhat poorly drained	2	3	3east	3d	20.2514	83.3446	170.804	1405.87	242.929	148.262	556.79	2670.14	13.7493	16.7629	160.582	414.349	35.0463	8.42937	2.78021	-2.9184	1229.2	5005.82	429.612	11.7909	364.181	14.5874
7000601902	PSP	46.7015	-70.1543	B	28	42	30	426	B	Mixed	Glacial without particular morphology	Thick	Moderately well drained	3	3	3east	3d	19.6743	82.9297	170.551	1385.04	243.074	147.813	559.204	2668.43	13.6336	16.6027	161.143	412.142	35.4109	8.27182	2.68473	-2.9326	1240	5014.05	437.863	11.5789	366.189	14.3348
7000601902	PSP	46.7015	-70.1543	C	51	32	17	426	B	Mixed	Glacial without particular morphology	Thick	Moderately well drained	3	3	3east	3d	19.6743	82.9297	170.551	1385.04	243.074	147.813	559.204	2668.43	13.6336	16.6027	161.143	412.142	35.4109	8.27182	2.68473	-2.9326	1240	5014.05	437.863	11.5789	366.189	14.3348
7000602001	PSP	46.7012	-70.6326	B	32	35	33	383	B	Deciduous	Slope and in situ weathered	Medium	Moderately well drained	3	3	3east	3d	20.4356	103.534	179.995	1466.44	255.28	158.649	599.935	2768.17	13.6753	17.1664	152.745	422.214	32.6365	8.2508	3.13325	-1.99076	1198.35	4884.2	389.915	10.8563	364.758	13.5653
7000602001	PSP	46.7012	-70.6326	C	34	40	26	383	B	Deciduous	Slope and in situ weathered	Medium	Moderately well drained	3	3	3east	3d	20.4356	103.534	179.995	1466.44	255.28	158.649	599.935	2768.17	13.6753	17.1664	152.745	422.214	32.6365	8.2508	3.13325	-1.99076	1198.35	4884.2	389.915	10.8563	364.758	13.5653
7000602002	PSP	46.6973	-70.6329	B	60	22	18	395	C	Deciduous	Slope and in situ weathered	Medium	Moderately well drained	2	3	3east	3d	18.6671	98.3278	178.423	1408.79	253.528	155.944	606.711	2744.27	13.4124	16.6749	156.198	416.227	33.8743	7.93196	2.86366	-2.22235	1246.02	4917.96	421.163	10.516	375.281	13.138
7000602002	PSP	46.6973	-70.6329	C	56	22	22	395	C	Deciduous	Slope and in situ weathered	Medium	Moderately well drained	2	3	3east	3d	18.6671	98.3278	178.423	1408.79	253.528	155.944	606.711	2744.27	13.4124	16.6749	156.198	416.227	33.8743	7.93196	2.86366	-2.22235	1246.02	4917.96	421.163	10.516	375.281	13.138
7000602101	PSP	46.7002	-70.7832	B	44	32	24	260	C	Coniferous	Glacial without particular morphology	Thin to very thin	Well drained	2	3	3east	3d	19.6083	112.675	180.018	1489.88	258.034	161.589	605.202	2791.33	13.7702	17.5458	146.36	423.644	31.5135	8.13757	3.14737	-1.80812	1157.31	4853.63	363.984	10.8972	367.02	13.6433
7000602201	PSP	46.7165	-70.0819	B	55	32	13	397	A	Coniferous	Glacial without particular morphology	Thick	Somewhat poorly drained	5	3	3east	3d	20.5985	79.3768	167.694	1394.48	240.761	144.686	542.79	2623	13.842	16.7181	162.381	412.651	35.2167	8.54686	2.67901	-3.17553	1225.38	5026.62	431.017	12.1018	363.717	14.9492
7000602201	PSP	46.7165	-70.0819	C	45	27	28	397	A	Coniferous	Glacial without particular morphology	Thick	Somewhat poorly drained	5	3	3east	3d	20.5985	79.3768	167.694	1394.48	240.761	144.686	542.79	2623	13.842	16.7181	162.381	412.651	35.2167	8.54686	2.67901	-3.17553	1225.38	5026.62	431.017	12.1018	363.717	14.9492
7000602202	PSP	46.7197	-70.0784	B	57	29	14	392	C	Mixed	Glacial without particular morphology	Thick	Moderately well drained	2	3	3east	3d	21.4994	82.0375	170.125	1433.76	242.066	147.648	546.915	2654.31	13.9576	16.9801	161.021	417.049	34.4444	8.69522	2.87445	-3.084	1208.35	4994.09	415.122	12.302	360.325	15.174
7000602202	PSP	46.7197	-70.0784	C	72	21	7	392	C	Mixed	Glacial without particular morphology	Thick	Moderately well drained	2	3	3east	3d	21.4994	82.0375	170.125	1433.76	242.066	147.648	546.915	2654.31	13.9576	16.9801	161.021	417.049	34.4444	8.69522	2.87445	-3.084	1208.35	4994.09	415.122	12.302	360.325	15.174
7000602301	PSP	46.7518	-70.6855	B	69	25	6	290	C	Coniferous	Glacial without particular morphology	Thin to very thin	Somewhat poorly drained	2	3	3east	3d	22.0978	115.536	183.912	1531.21	259.77	164.743	613.573	2822.23	13.8259	17.6612	145.237	429.623	31.6126	8.4414	3.45295	-1.48845	1176.48	4832.53	371.486	10.8753	360.702	13.7808
7000602301	PSP	46.7518	-70.6855	B	77	17	7	290	C	Coniferous	Glacial without particular morphology	Thin to very thin	Somewhat poorly drained	2	3	3east	3d	22.0978	115.536	183.912	1531.21	259.77	164.743	613.573	2822.23	13.8259	17.6612	145.237	429.623	31.6126	8.4414	3.45295	-1.48845	1176.48	4832.53	371.486	10.8753	360.702	13.7808
7000602301	PSP	46.7518	-70.6855	C	57	31	12	290	C	Coniferous	Glacial without particular morphology	Thin to very thin	Somewhat poorly drained	2	3	3east	3d	22.0978	115.536	183.912	1531.21	259.77	164.743	613.573	2822.23	13.8259	17.6612	145.237	429.623	31.6126	8.4414	3.45295	-1.48845	1176.48	4832.53	371.486	10.8753	360.702	13.7808
7000602301	PSP	46.7518	-70.6855	C	59	28	14	290	C	Coniferous	Glacial without particular morphology	Thin to very thin	Somewhat poorly drained	2	3	3east	3d	22.0978	115.536	183.912	1531.21	259.77	164.743	613.573	2822.23	13.8259	17.6612	145.237	429.623	31.6126	8.4414	3.45295	-1.48845	1176.48	4832.53	371.486	10.8753	360.702	13.7808
7000602302	PSP	46.755	-70.6824	B	64	22	14	296	C	Coniferous	Glacial without particular morphology	Medium	Moderately well drained	2	3	3east	3d	21.8511	113.95	183.47	1519.86	259.094	164.161	612.297	2817.75	13.7856	17.5937	146.147	428.235	31.9823	8.37344	3.39373	-1.54019	1182.65	4841.72	377.633	10.8262	361.462	13.7036
7000602302	PSP	46.755	-70.6824	C	62	26	12	296	C	Coniferous	Glacial without particular morphology	Medium	Moderately well drained	2	3	3east	3d	21.8511	113.95	183.47	1519.86	259.094	164.161	612.297	2817.75	13.7856	17.5937	146.147	428.235	31.9823	8.37344	3.39373	-1.54019	1182.65	4841.72	377.633	10.8262	361.462	13.7036
7000602401	PSP	46.7502	-70.9832	B	58	26	16	101	A	Mixed	Slope and in situ weathered	Thick	Somewhat poorly drained	2	2	2east	2b	26.8198	138.068	194.7	1737.53	269.709	178.682	649.716	2927.33	14.4433	19.0164	132.641	453.721	28.8883	9.31749	4.49637	-0.323994	1142.64	4689.82	329.782	11.2788	352.713	14.5555
7000602401	PSP	46.7502	-70.9832	C	31	37	32	101	A	Mixed	Slope and in situ weathered	Thick	Somewhat poorly drained	2	2	2east	2b	26.8198	138.068	194.7	1737.53	269.709	178.682	649.716	2927.33	14.4433	19.0164	132.641	453.721	28.8883	9.31749	4.49637	-0.323994	1142.64	4689.82	329.782	11.2788	352.713	14.5555
7000602502	PSP	46.7682	-70.2033	B	72	24	4	420	C	Mixed	Juxtaglacial	Thick	Moderately well drained	2	3	3east	3d	21.2784	91.0739	173.334	1415.03	248.238	151.194	566.519	2702.8	13.679	16.8544	158.165	415.849	34.7508	8.34321	2.85769	-2.61293	1219.73	4983.2	422.824	11.4579	361.617	14.2442
7000602502	PSP	46.7682	-70.2033	C	95	0	5	420	C	Mixed	Juxtaglacial	Thick	Moderately well drained	2	3	3east	3d	21.2784	91.0739	173.334	1415.03	248.238	151.194	566.519	2702.8	13.679	16.8544	158.165	415.849	34.7508	8.34321	2.85769	-2.61293	1219.73	4983.2	422.824	11.4579	361.617	14.2442
7000602601	PSP	46.7678	-70.6171	B	60	24	16	309	A	Mixed	Glacial without particular morphology	Medium	Somewhat poorly drained	2	3	3east	3d	23.0161	111.036	183.297	1512.72	258.067	163.902	608.483	2825.63	13.7425	17.5166	148.032	427.825	31.9856	8.447	3.40768	-1.55035	1180.05	4847.05	376.807	10.8841	358.69	13.794
7000602601	PSP	46.7678	-70.6171	C	66	24	10	309	A	Mixed	Glacial without particular morphology	Medium	Somewhat poorly drained	2	3	3east	3d	23.0161	111.036	183.297	1512.72	258.067	163.902	608.483	2825.63	13.7425	17.5166	148.032	427.825	31.9856	8.447	3.40768	-1.55035	1180.05	4847.05	376.807	10.8841	358.69	13.794
7000602601	PSP	46.7678	-70.6171	C	68	23	10	309	A	Mixed	Glacial without particular morphology	Medium	Somewhat poorly drained	2	3	3east	3d	23.0161	111.036	183.297	1512.72	258.067	163.902	608.483	2825.63	13.7425	17.5166	148.032	427.825	31.9856	8.447	3.40768	-1.55035	1180.05	4847.05	376.807	10.8841	358.69	13.794
7000602602	PSP	46.7711	-70.6142	B	41	21	38	329	B	Mixed	Glacial without particular morphology	Thin	Moderately well drained	3	3	3east	3d	22.4623	107.407	182.29	1488.38	256.587	162.374	604.356	2818.13	13.65	17.3442	150.182	425.169	32.6592	8.3356	3.28277	-1.71014	1192.3	4868.07	388.396	10.848	359.53	13.7034
7000602701	PSP	46.7672	-71.0504	B	47	31	22	92	A	Mixed	Marine and littoral	Thick	Poorly drained	7	2	2east	2b	26.8323	140.166	195.363	1753.97	271.168	179.039	661.143	2936.35	14.5149	19.1173	132.001	455.977	28.8342	9.49285	4.59953	-0.219634	1169.29	4696.3	336.589	11.3709	353.776	14.7556
7000602701	PSP	46.7672	-71.0504	C	46	32	22	92	A	Mixed	Marine and littoral	Thick	Poorly drained	7	2	2east	2b	26.8323	140.166	195.363	1753.97	271.168	179.039	661.143	2936.35	14.5149	19.1173	132.001	455.977	28.8342	9.49285	4.59953	-0.219634	1169.29	4696.3	336.589	11.3709	353.776	14.7556
7000602702	PSP	46.7638	-71.0533	B	47	34	19	91	A	Mixed	Marine and littoral	Thick	Somewhat poorly drained	2	2	2east	2b	26.9633	140.604	196.007	1763.56	271.41	179.857	662.005	2933.79	14.5346	19.1714	131.808	456.98	29.1381	9.48017	4.63788	-0.185762	1169.93	4684.15	340.471	11.3735	353.864	14.7464
7000602702	PSP	46.7638	-71.0533	C	70	20	10	91	A	Mixed	Marine and littoral	Thick	Somewhat poorly drained	2	2	2east	2b	26.9633	140.604	196.007	1763.56	271.41	179.857	662.005	2933.79	14.5346	19.1714	131.808	456.98	29.1381	9.48017	4.63788	-0.185762	1169.93	4684.15	340.471	11.3735	353.864	14.7464
7000602801	PSP	46.7837	-70.5836	B	64	22	14	369	C	Mixed	Glacial without particular morphology	Medium	Moderately well drained	3	3	3east	3d	22.6886	103.055	179.91	1467.42	254.458	158.983	591.147	2794.16	13.6724	17.2544	152.396	423.134	33.2632	8.35061	3.16608	-1.99804	1197.01	4912.95	397.516	11.0655	357.781	13.8913
7000602802	PSP	46.7867	-70.5797	B	44	33	23	372	B	Mixed	Glacial without particular morphology	Thin to very thin	Moderately well drained	3	3	3east	3d	22.4286	101.892	179.53	1454.1	254.251	158.532	590.959	2778.72	13.6073	17.1019	153.361	421.047	33.5648	8.26762	3.12952	-2.01521	1202.53	4909.48	402.444	10.95	358.359	13.753
7000602901	PSP	46.8005	-71.0001	B	86	6	8	100	C	Mixed	Marine and littoral	Thick	Moderately well drained	2	2	2east	2b	26.751	140.135	195.614	1745.27	271.002	180.142	663.943	2937.47	14.4229	19.053	131.871	454.79	28.9934	9.36404	4.54428	-0.272354	1165.73	4684.09	337.814	11.2761	353.53	14.6705
7000602901	PSP	46.8005	-71.0001	C	95	2	3	100	C	Mixed	Marine and littoral	Thick	Moderately well drained	2	2	2east	2b	26.751	140.135	195.614	1745.27	271.002	180.142	663.943	2937.47	14.4229	19.053	131.871	454.79	28.9934	9.36404	4.54428	-0.272354	1165.73	4684.09	337.814	11.2761	353.53	14.6705
7000602902	PSP	46.8043	-71.0001	B	54	23	23	98	A	Coniferous	Marine and littoral	Thick	Somewhat poorly drained	2	2	2east	2b	26.751	140.135	195.614	1745.27	271.002	180.142	663.943	2937.47	14.4229	19.053	131.871	454.79	28.9934	9.36404	4.54428	-0.272354	1165.73	4684.09	337.814	11.2761	353.53	14.6705
7000602902	PSP	46.8043	-71.0001	C	50	34	16	98	A	Coniferous	Marine and littoral	Thick	Somewhat poorly drained	2	2	2east	2b	26.751	140.135	195.614	1745.27	271.002	180.142	663.943	2937.47	14.4229	19.053	131.871	454.79	28.9934	9.36404	4.54428	-0.272354	1165.73	4684.09	337.814	11.2761	353.53	14.6705
7000603001	PSP	46.8163	-69.9165	B	58	24	18	377	C	Deciduous	Glacial without particular morphology	Medium	Moderately well drained	2	3	3east	3d	23.0296	93.0881	172.281	1470.49	248.531	150.76	549.383	2684	14.0875	17.3387	156.43	420.233	33.4055	8.73873	3.03078	-2.70743	1163.51	4953.93	387.916	12.3227	354.857	15.2663
7000603001	PSP	46.8163	-69.9165	C	55	30	15	377	C	Deciduous	Glacial without particular morphology	Medium	Moderately well drained	2	3	3east	3d	23.0296	93.0881	172.281	1470.49	248.531	150.76	549.383	2684	14.0875	17.3387	156.43	420.233	33.4055	8.73873	3.03078	-2.70743	1163.51	4953.93	387.916	12.3227	354.857	15.2663
7000603002	PSP	46.8194	-69.913	B	53	28	19	398	C	Deciduous	Glacial without particular morphology	Medium	Moderately well drained	3	3	3east	3d	21.7422	92.3364	170.418	1421.6	248.557	149.665	551.14	2679.73	13.8508	17.0746	157.227	414.472	34.1634	8.36635	2.76385	-2.88331	1171.02	4980.41	400.705	12.0066	358.887	14.737
7000603002	PSP	46.8194	-69.913	C	47	30	23	398	C	Deciduous	Glacial without particular morphology	Medium	Moderately well drained	3	3	3east	3d	21.7422	92.3364	170.418	1421.6	248.557	149.665	551.14	2679.73	13.8508	17.0746	157.227	414.472	34.1634	8.36635	2.76385	-2.88331	1171.02	4980.41	400.705	12.0066	358.887	14.737
7000603002	PSP	46.8194	-69.913	C	56	26	18	398	C	Deciduous	Glacial without particular morphology	Medium	Moderately well drained	3	3	3east	3d	21.7422	92.3364	170.418	1421.6	248.557	149.665	551.14	2679.73	13.8508	17.0746	157.227	414.472	34.1634	8.36635	2.76385	-2.88331	1171.02	4980.41	400.705	12.0066	358.887	14.737
7000603101	PSP	46.8165	-70.298	B	41	40	19	483	B	Mixed	Glacial without particular morphology	Thick	Somewhat poorly drained	5	3	3east	3d	21.0688	88.8296	171.584	1361.29	247.012	148.858	560.577	2692.61	13.4504	16.5573	159.182	410.244	35.5899	7.96296	2.59385	-2.77389	1222.42	5021.71	434.038	11.1365	361.012	13.7692
7000603101	PSP	46.8165	-70.298	C	46	34	20	483	B	Mixed	Glacial without particular morphology	Thick	Somewhat poorly drained	5	3	3east	3d	21.0688	88.8296	171.584	1361.29	247.012	148.858	560.577	2692.61	13.4504	16.5573	159.182	410.244	35.5899	7.96296	2.59385	-2.77389	1222.42	5021.71	434.038	11.1365	361.012	13.7692
7000603102	PSP	46.8177	-70.3037	B	35	51	14	455	D	Deciduous	Glacial without particular morphology	Thick	Moderately well drained	2	3	3east	3d	22.2679	91.3982	173.239	1388.93	248.371	150.544	561.281	2711.44	13.5445	16.7386	157.971	413.805	35.1093	8.12786	2.74308	-2.61414	1209.83	5004.3	424.39	11.2091	359.033	13.8982
7000603102	PSP	46.8177	-70.3037	C	41	36	23	455	D	Deciduous	Glacial without particular morphology	Thick	Moderately well drained	2	3	3east	3d	22.2679	91.3982	173.239	1388.93	248.371	150.544	561.281	2711.44	13.5445	16.7386	157.971	413.805	35.1093	8.12786	2.74308	-2.61414	1209.83	5004.3	424.39	11.2091	359.033	13.8982
7000603201	PSP	46.8334	-70.7993	B	74	14	12	102	C	Deciduous	Glacial without particular morphology	Medium	Moderately well drained	2	2	2east	2b	25.7768	137.604	193.299	1721.29	269.197	178.252	655.548	2936.73	14.3864	18.9295	132.595	451.799	27.9068	9.30827	4.383	-0.531232	1138.62	4700.63	317.375	11.5018	350.354	14.9347
7000603202	PSP	46.8347	-70.8047	B	61	18	21	96	A	Deciduous	Glacial without particular morphology	Medium	Moderately well drained	3	2	2east	2b	26.2798	140.635	195.054	1742.88	270.812	179.894	661.846	2941.47	14.4326	19.1103	131.173	454.77	27.49	9.40525	4.52508	-0.377832	1138.81	4672.56	313.43	11.4376	351.094	14.8994
7000603202	PSP	46.8347	-70.8047	C	66	26	8	96	A	Deciduous	Glacial without particular morphology	Medium	Moderately well drained	3	2	2east	2b	26.2798	140.635	195.054	1742.88	270.812	179.894	661.846	2941.47	14.4326	19.1103	131.173	454.77	27.49	9.40525	4.52508	-0.377832	1138.81	4672.56	313.43	11.4376	351.094	14.8994
7000603301	PSP	46.8492	-70.3004	B	79	14	7	428	C	Coniferous	Glacial without particular morphology	Medium	Moderately well drained	2	3	3east	3d	22.6575	91.3879	172.968	1388.45	248.443	150.481	556.666	2708.79	13.5502	16.7774	158.058	413.495	35.1389	8.09018	2.73382	-2.60619	1199.69	4997.57	420.606	11.1986	355.384	13.9016
7000603301	PSP	46.8492	-70.3004	C	87	10	3	428	C	Coniferous	Glacial without particular morphology	Medium	Moderately well drained	2	3	3east	3d	22.6575	91.3879	172.968	1388.45	248.443	150.481	556.666	2708.79	13.5502	16.7774	158.058	413.495	35.1389	8.09018	2.73382	-2.60619	1199.69	4997.57	420.606	11.1986	355.384	13.9016
7000603302	PSP	46.8481	-70.3059	B	64	26	10	438	B	Coniferous	Glacial without particular morphology	Thick	Moderately well drained	2	3	3east	3d	22.3932	90.7211	172.761	1381.07	248.079	150.637	558.51	2713.07	13.5012	16.702	158.359	412.817	35.1872	8.05511	2.70702	-2.63697	1202.94	5001.09	422.389	11.198	356.217	13.8947
7000603302	PSP	46.8481	-70.3059	C	63	19	18	438	B	Coniferous	Glacial without particular morphology	Thick	Moderately well drained	2	3	3east	3d	22.3932	90.7211	172.761	1381.07	248.079	150.637	558.51	2713.07	13.5012	16.702	158.359	412.817	35.1872	8.05511	2.70702	-2.63697	1202.94	5001.09	422.389	11.198	356.217	13.8947
7000603401	PSP	46.8676	-70.199	B	36	34	30	434	D	Mixed	Glacial without particular morphology	Thick	Moderately well drained	2	3	3east	3d	20.8896	88.7963	170.481	1363.86	247.334	148.328	558.921	2683.68	13.501	16.6135	159.542	409.8	35.6518	8.01418	2.58633	-2.83691	1223.86	5019.62	435.331	11.2554	361.082	13.8887
7000603401	PSP	46.8676	-70.199	C	52	30	18	434	D	Mixed	Glacial without particular morphology	Thick	Moderately well drained	2	3	3east	3d	20.8896	88.7963	170.481	1363.86	247.334	148.328	558.921	2683.68	13.501	16.6135	159.542	409.8	35.6518	8.01418	2.58633	-2.83691	1223.86	5019.62	435.331	11.2554	361.082	13.8887
7000603402	PSP	46.8642	-70.1958	B	63	27	10	433	D	Deciduous	Glacial without particular morphology	Thick	Moderately well drained	2	3	3east	3d	22.3357	93.4465	172.87	1401.4	249.698	150.909	561.158	2703.41	13.6334	16.8991	157.253	414.076	35.0398	8.17616	2.78531	-2.60107	1204.64	4982.89	421.148	11.337	356.742	14.0416
7000603402	PSP	46.8642	-70.1958	C	56	28	16	433	D	Deciduous	Glacial without particular morphology	Thick	Moderately well drained	2	3	3east	3d	22.3357	93.4465	172.87	1401.4	249.698	150.909	561.158	2703.41	13.6334	16.8991	157.253	414.076	35.0398	8.17616	2.78531	-2.60107	1204.64	4982.89	421.148	11.337	356.742	14.0416
7000603501	PSP	46.9	-70.1491	B	54	25	21	438	C	Deciduous	Glacial without particular morphology	Thick	Moderately well drained	3	3	3east	3d	22.3372	97.7747	173.311	1416.71	251.822	152.628	566.029	2721.11	13.6899	17.0925	155.042	414.819	34.6492	8.1474	2.81054	-2.5002	1190.72	4964.53	411.625	11.3551	357.27	14.0901
7000603501	PSP	46.9	-70.1491	C	63	20	17	438	C	Deciduous	Glacial without particular morphology	Thick	Moderately well drained	3	3	3east	3d	22.3372	97.7747	173.311	1416.71	251.822	152.628	566.029	2721.11	13.6899	17.0925	155.042	414.819	34.6492	8.1474	2.81054	-2.5002	1190.72	4964.53	411.625	11.3551	357.27	14.0901
7000603502	PSP	46.8988	-70.1438	B	69	15	16	430	C	Coniferous	Glacial without particular morphology	Thick	Well drained	2	3	3east	3d	22.3372	97.7747	173.311	1416.71	251.822	152.628	566.029	2721.11	13.6899	17.0925	155.042	414.819	34.6492	8.1474	2.81054	-2.5002	1190.72	4964.53	411.625	11.3551	357.27	14.0901
7000603502	PSP	46.8988	-70.1438	C	86	7	7	430	C	Coniferous	Glacial without particular morphology	Thick	Well drained	2	3	3east	3d	22.3372	97.7747	173.311	1416.71	251.822	152.628	566.029	2721.11	13.6899	17.0925	155.042	414.819	34.6492	8.1474	2.81054	-2.5002	1190.72	4964.53	411.625	11.3551	357.27	14.0901
7000603601	PSP	46.8999	-70.3989	B	35	44	21	383	A	Coniferous	Glacial without particular morphology	Medium	Somewhat poorly drained	5	3	3east	3d	25.8692	99.3963	178.045	1439.37	252.915	156.24	561.718	2750.98	13.6112	17.1165	154.517	419.904	33.9612	8.24573	3.07002	-2.1068	1163.81	4915.41	394.034	11.0308	344.65	13.8205
7000603601	PSP	46.8999	-70.3989	C	49	35	16	383	A	Coniferous	Glacial without particular morphology	Medium	Somewhat poorly drained	5	3	3east	3d	25.8692	99.3963	178.045	1439.37	252.915	156.24	561.718	2750.98	13.6112	17.1165	154.517	419.904	33.9612	8.24573	3.07002	-2.1068	1163.81	4915.41	394.034	11.0308	344.65	13.8205
7000603602	PSP	46.901	-70.3934	B	57	24	19	380	B	Coniferous	Glacial without particular morphology	Medium	Somewhat poorly drained	2	3	3east	3d	25.1354	96.4189	176.285	1418.03	251.444	154.441	559.879	2740.61	13.5596	16.9492	156.025	417.098	34.4612	8.14591	2.93082	-2.27097	1177.52	4941.46	405.319	10.9467	349.354	13.7128
7000603602	PSP	46.901	-70.3934	C	54	33	13	380	B	Coniferous	Glacial without particular morphology	Medium	Somewhat poorly drained	2	3	3east	3d	25.1354	96.4189	176.285	1418.03	251.444	154.441	559.879	2740.61	13.5596	16.9492	156.025	417.098	34.4612	8.14591	2.93082	-2.27097	1177.52	4941.46	405.319	10.9467	349.354	13.7128
7000603701	PSP	46.9004	-70.449	B	60	26	14	377	B	Coniferous	Glacial without particular morphology	Medium	Somewhat poorly drained	3	3	3east	3d	25.3744	102.661	179.068	1454	254.635	158.713	575.643	2784.79	13.6142	17.2122	152.973	421.378	33.7003	8.28532	3.13577	-1.99511	1172.46	4908.29	393.891	10.9768	348.513	13.794
7000603701	PSP	46.9004	-70.449	C	61	24	15	377	B	Coniferous	Glacial without particular morphology	Medium	Somewhat poorly drained	3	3	3east	3d	25.3744	102.661	179.068	1454	254.635	158.713	575.643	2784.79	13.6142	17.2122	152.973	421.378	33.7003	8.28532	3.13577	-1.99511	1172.46	4908.29	393.891	10.9768	348.513	13.794
7000603702	PSP	46.9015	-70.4544	B	47	28	25	373	B	Coniferous	Glacial without particular morphology	Thin to very thin	Moderately well drained	2	3	3east	3d	24.6494	100.671	177.993	1440.56	253.676	157.295	573.582	2773.75	13.5917	17.1121	154.005	419.754	34.0141	8.23192	3.05291	-2.0993	1180.03	4924.98	399.996	10.9914	349.933	13.7922
7000603702	PSP	46.9015	-70.4544	C	58	21	21	373	B	Coniferous	Glacial without particular morphology	Thin to very thin	Moderately well drained	2	3	3east	3d	24.6494	100.671	177.993	1440.56	253.676	157.295	573.582	2773.75	13.5917	17.1121	154.005	419.754	34.0141	8.23192	3.05291	-2.0993	1180.03	4924.98	399.996	10.9914	349.933	13.7922
7000603801	PSP	46.9025	-70.5497	B	50	34	16	209	A	Coniferous	Glacial without particular morphology	Medium	Somewhat poorly drained	3	3	3east	3d	27.2503	126.984	186.442	1579.15	265.363	170.908	621.448	2892.17	13.9	18.0403	139.38	435.654	30.4619	8.78262	3.81464	-1.11898	1135.38	4794.76	343.925	11.0719	348.564	14.174
7000603801	PSP	46.9025	-70.5497	C	57	26	17	209	A	Coniferous	Glacial without particular morphology	Medium	Somewhat poorly drained	3	3	3east	3d	27.2503	126.984	186.442	1579.15	265.363	170.908	621.448	2892.17	13.9	18.0403	139.38	435.654	30.4619	8.78262	3.81464	-1.11898	1135.38	4794.76	343.925	11.0719	348.564	14.174
7000603802	PSP	46.9008	-70.5548	B	48	32	20	210	C	Deciduous	Glacial without particular morphology	Medium	Moderately well drained	3	3	3east	3d	27.6876	128.972	187.976	1597.04	266.206	172.439	626.025	2900.13	13.9316	18.1608	138.236	437.711	30.1288	8.81474	3.89304	-1.01314	1132.12	4771.63	339.237	11.036	347.69	14.17
7000603802	PSP	46.9008	-70.5548	C	48	28	24	210	C	Deciduous	Glacial without particular morphology	Medium	Moderately well drained	3	3	3east	3d	27.6876	128.972	187.976	1597.04	266.206	172.439	626.025	2900.13	13.9316	18.1608	138.236	437.711	30.1288	8.81474	3.89304	-1.01314	1132.12	4771.63	339.237	11.036	347.69	14.17
7000603901	PSP	46.9672	-70.3646	B	56	26	18	330	C	Coniferous	Glacial without particular morphology	Medium	Moderately well drained	2	3	3east	3d	27.9835	106.914	179.181	1466.42	256.375	160.597	567.274	2800.73	13.6386	17.3197	150.465	422.359	33.3961	8.28138	3.17119	-1.96657	1132.51	4886.22	377.644	11.0593	340.149	13.8617
7000603901	PSP	46.9672	-70.3646	C	70	24	6	330	C	Coniferous	Glacial without particular morphology	Medium	Moderately well drained	2	3	3east	3d	27.9835	106.914	179.181	1466.42	256.375	160.597	567.274	2800.73	13.6386	17.3197	150.465	422.359	33.3961	8.28138	3.17119	-1.96657	1132.51	4886.22	377.644	11.0593	340.149	13.8617
7000603902	PSP	46.9639	-70.3678	B	47	36	17	326	B	Coniferous	Glacial without particular morphology	Medium	Moderately well drained	2	3	3east	3d	28.4195	107.791	179.48	1472.35	256.788	161.357	567.167	2810.36	13.6449	17.4072	149.996	423.018	33.2966	8.30345	3.2093	-1.89806	1127.99	4880.53	374.665	11.0595	338.75	13.8806
7000604001	PSP	47.0163	-70.1995	B	68	19	13	392	A	Coniferous	Glacial without particular morphology	Thick	Somewhat poorly drained	5	3	3east	3d	26.3768	101.975	174.6	1409.19	254.234	155.306	553.543	2732.35	13.5417	17.0699	153.26	414.564	34.8649	7.90828	2.78975	-2.33198	1148.18	4924.11	399.172	10.8996	340.595	13.5259
7000604001	PSP	47.0163	-70.1995	C	50	27	23	392	A	Coniferous	Glacial without particular morphology	Thick	Somewhat poorly drained	5	3	3east	3d	26.3768	101.975	174.6	1409.19	254.234	155.306	553.543	2732.35	13.5417	17.0699	153.26	414.564	34.8649	7.90828	2.78975	-2.33198	1148.18	4924.11	399.172	10.8996	340.595	13.5259
7000604101	PSP	47.0505	-70.1486	B	47	36	17	423	B	Coniferous	Glacial without particular morphology	Thick	Moderately well drained	2	3	3east	3d	25.267	100.013	172.584	1393.72	253.52	152.47	548.142	2708.43	13.5722	16.9823	154.507	412.297	35.5071	7.82727	2.63474	-2.465	1163.01	4965.76	412.797	10.8294	345.697	13.4315
7000604101	PSP	47.0505	-70.1486	C	51	29	20	423	B	Coniferous	Glacial without particular morphology	Thick	Moderately well drained	2	3	3east	3d	25.267	100.013	172.584	1393.72	253.52	152.47	548.142	2708.43	13.5722	16.9823	154.507	412.297	35.5071	7.82727	2.63474	-2.465	1163.01	4965.76	412.797	10.8294	345.697	13.4315
7000604102	PSP	47.0536	-70.1521	B	36	34	30	411	B	Coniferous	Glacial without particular morphology	Thick	Somewhat poorly drained	2	3	3east	3d	26.3971	100.792	173.287	1406.05	254.007	154.662	552.534	2739.57	13.5555	17.0653	154.211	413.947	35.2935	7.90323	2.71331	-2.38964	1156.02	4954.71	407.562	10.8453	343.707	13.4491
7000604102	PSP	47.0536	-70.1521	C	45	28	27	411	B	Coniferous	Glacial without particular morphology	Thick	Somewhat poorly drained	2	3	3east	3d	26.3971	100.792	173.287	1406.05	254.007	154.662	552.534	2739.57	13.5555	17.0653	154.211	413.947	35.2935	7.90323	2.71331	-2.38964	1156.02	4954.71	407.562	10.8453	343.707	13.4491
7000604201	PSP	47.0501	-70.3498	B	79	12	9	117	C	Deciduous	Marine and littoral	Thick	Well drained	1	2	2east	2b	43.0651	131.691	191.471	1634.08	269.656	176.361	568.471	2933.15	13.9455	18.4734	138.965	442.768	31.0489	8.88854	4.13331	-0.632373	1038.11	4727.43	321.107	10.7366	315.239	13.7554
7000604201	PSP	47.0501	-70.3498	C	83	10	7	117	C	Deciduous	Marine and littoral	Thick	Well drained	1	2	2east	2b	43.0651	131.691	191.471	1634.08	269.656	176.361	568.471	2933.15	13.9455	18.4734	138.965	442.768	31.0489	8.88854	4.13331	-0.632373	1038.11	4727.43	321.107	10.7366	315.239	13.7554
7000604202	PSP	47.0489	-70.3449	B	53	28	19	143	A	Deciduous	Marine and littoral	Thick	Moderately well drained	2	2	2east	2b	43.0651	131.691	191.471	1634.08	269.656	176.361	568.471	2933.15	13.9455	18.4734	138.965	442.768	31.0489	8.88854	4.13331	-0.632373	1038.11	4727.43	321.107	10.7366	315.239	13.7554
7000604202	PSP	47.0489	-70.3449	C	55	35	10	143	A	Deciduous	Marine and littoral	Thick	Moderately well drained	2	2	2east	2b	43.0651	131.691	191.471	1634.08	269.656	176.361	568.471	2933.15	13.9455	18.4734	138.965	442.768	31.0489	8.88854	4.13331	-0.632373	1038.11	4727.43	321.107	10.7366	315.239	13.7554
7000700101	PSP	45.767	-71.9163	B	47	42	11	249	C	Mixed	Glacial without particular morphology	Thick	Somewhat poorly drained	2	2	2east	2c	29.1554	129.475	198.754	1810.07	265.589	173.887	643.12	2868.75	14.8641	18.8719	137.126	462.824	28.065	9.99186	4.98596	0.072315	1177.45	4728.47	329.55	11.0356	365.37	13.9937
7000700101	PSP	45.767	-71.9163	C	63	27	10	249	C	Mixed	Glacial without particular morphology	Thick	Somewhat poorly drained	2	2	2east	2c	29.1554	129.475	198.754	1810.07	265.589	173.887	643.12	2868.75	14.8641	18.8719	137.126	462.824	28.065	9.99186	4.98596	0.072315	1177.45	4728.47	329.55	11.0356	365.37	13.9937
7000700102	PSP	45.7707	-71.9167	B	53	28	19	242	B	Deciduous	Glacial without particular morphology	Thick	Somewhat poorly drained	5	2	2east	2c	32.4317	132.102	200.469	1855.41	266.986	176.01	636.195	2894.84	15.0103	19.1016	135.888	468.386	27.2471	10.2798	5.22706	0.277199	1142.99	4719.83	311.616	11.3333	358.483	14.4334
7000700102	PSP	45.7707	-71.9167	C	51	35	14	242	B	Deciduous	Glacial without particular morphology	Thick	Somewhat poorly drained	5	2	2east	2c	32.4317	132.102	200.469	1855.41	266.986	176.01	636.195	2894.84	15.0103	19.1016	135.888	468.386	27.2471	10.2798	5.22706	0.277199	1142.99	4719.83	311.616	11.3333	358.483	14.4334
7000700201	PSP	45.7829	-71.9327	B	48	41	11	188	A	Mixed	Glacial without particular morphology	Thick	Somewhat poorly drained	4	2	2east	2c	37.2287	135.477	203.222	1943.93	268.976	178.684	622.145	2921.91	15.3395	19.4698	134.5	478.986	25.7225	10.7777	5.62652	0.540581	1086.01	4699.79	279.231	11.8769	345.809	15.1104
7000700201	PSP	45.7829	-71.9327	C	51	32	17	188	A	Mixed	Glacial without particular morphology	Thick	Somewhat poorly drained	4	2	2east	2c	37.2287	135.477	203.222	1943.93	268.976	178.684	622.145	2921.91	15.3395	19.4698	134.5	478.986	25.7225	10.7777	5.62652	0.540581	1086.01	4699.79	279.231	11.8769	345.809	15.1104
7000700202	PSP	45.7839	-71.9268	B	51	38	11	200	D	Deciduous	Glacial without particular morphology	Thick	Moderately well drained	2	2	2east	2c	39.4399	137.271	204.1	1965.37	269.953	179.282	616.128	2928.76	15.432	19.6139	133.682	481.921	25.6668	10.913	5.73923	0.691304	1074.16	4692.07	276.169	12.1468	341.079	15.418
7000700202	PSP	45.7839	-71.9268	C	37	50	13	200	D	Deciduous	Glacial without particular morphology	Thick	Moderately well drained	2	2	2east	2c	39.4399	137.271	204.1	1965.37	269.953	179.282	616.128	2928.76	15.432	19.6139	133.682	481.921	25.6668	10.913	5.73923	0.691304	1074.16	4692.07	276.169	12.1468	341.079	15.418
7000700301	PSP	45.833	-72.1651	B	97	1	2	125	B	Mixed	Marine and littoral	Thick	Moderately well drained	2	2	2east	2b	42.2859	140.688	206.869	2022.83	271.845	182.279	616.307	2951.36	15.5842	19.9409	132.161	488.652	25.7631	11.0803	5.97692	0.809109	1077.31	4667.16	277.18	12.0142	335.149	15.3134
7000700301	PSP	45.833	-72.1651	C	98	1	1	125	B	Mixed	Marine and littoral	Thick	Moderately well drained	2	2	2east	2b	42.2859	140.688	206.869	2022.83	271.845	182.279	616.307	2951.36	15.5842	19.9409	132.161	488.652	25.7631	11.0803	5.97692	0.809109	1077.31	4667.16	277.18	12.0142	335.149	15.3134
7000700302	PSP	45.8293	-72.1654	B	75	15	10	137	B	Mixed	Marine and littoral	Thick	Moderately well drained	2	2	2east	2b	42.2859	140.688	206.869	2022.83	271.845	182.279	616.307	2951.36	15.5842	19.9409	132.161	488.652	25.7631	11.0803	5.97692	0.809109	1077.31	4667.16	277.18	12.0142	335.149	15.3134
7000700302	PSP	45.8293	-72.1654	C	73	17	10	137	B	Mixed	Marine and littoral	Thick	Moderately well drained	2	2	2east	2b	42.2859	140.688	206.869	2022.83	271.845	182.279	616.307	2951.36	15.5842	19.9409	132.161	488.652	25.7631	11.0803	5.97692	0.809109	1077.31	4667.16	277.18	12.0142	335.149	15.3134
7000700401	PSP	45.8499	-72.1146	B	81	13	6	120	A	Mixed	Marine and littoral	Thick	Somewhat poorly drained	2	2	2east	2b	43.4831	139.808	206.685	2032.78	271.353	181.895	605.949	2951.91	15.6517	20.0014	132.547	489.991	25.0833	11.2087	6.02271	0.842523	1046.22	4668.48	262.039	12.2674	330.009	15.6567
7000700401	PSP	45.8499	-72.1146	C	36	38	26	120	A	Mixed	Marine and littoral	Thick	Somewhat poorly drained	2	2	2east	2b	43.4831	139.808	206.685	2032.78	271.353	181.895	605.949	2951.91	15.6517	20.0014	132.547	489.991	25.0833	11.2087	6.02271	0.842523	1046.22	4668.48	262.039	12.2674	330.009	15.6567
7000700402	PSP	45.8512	-72.109	B	52	38	10	117	B	Mixed	Marine and littoral	Thick	Somewhat poorly drained	3	2	2east	2b	44.5316	139.838	205.952	2022.14	271.357	181.48	598.601	2960.38	15.6281	19.9621	132.521	488.939	25.1951	11.2074	5.96653	0.874177	1036.38	4680.51	260.92	12.4081	324.363	15.8369
7000700402	PSP	45.8512	-72.109	B	63	26	11	117	B	Mixed	Marine and littoral	Thick	Somewhat poorly drained	3	2	2east	2b	44.5316	139.838	205.952	2022.14	271.357	181.48	598.601	2960.38	15.6281	19.9621	132.521	488.939	25.1951	11.2074	5.96653	0.874177	1036.38	4680.51	260.92	12.4081	324.363	15.8369
7000700402	PSP	45.8512	-72.109	C	27	52	21	117	B	Mixed	Marine and littoral	Thick	Somewhat poorly drained	3	2	2east	2b	44.5316	139.838	205.952	2022.14	271.357	181.48	598.601	2960.38	15.6281	19.9621	132.521	488.939	25.1951	11.2074	5.96653	0.874177	1036.38	4680.51	260.92	12.4081	324.363	15.8369
7000700402	PSP	45.8512	-72.109	C	56	35	9	117	B	Mixed	Marine and littoral	Thick	Somewhat poorly drained	3	2	2east	2b	44.5316	139.838	205.952	2022.14	271.357	181.48	598.601	2960.38	15.6281	19.9621	132.521	488.939	25.1951	11.2074	5.96653	0.874177	1036.38	4680.51	260.92	12.4081	324.363	15.8369
7000700402	PSP	45.8512	-72.109	C	56	35	9	117	B	Mixed	Marine and littoral	Thick	Somewhat poorly drained	3	2	2east	2b	44.5316	139.838	205.952	2022.14	271.357	181.48	598.601	2960.38	15.6281	19.9621	132.521	488.939	25.1951	11.2074	5.96653	0.874177	1036.38	4680.51	260.92	12.4081	324.363	15.8369
7000700501	PSP	45.884	-72.016	B	58	23	19	168	C	Deciduous	Glacial without particular morphology	Medium	Moderately well drained	2	2	2east	2c	36.9105	135.213	202.824	1930.07	268.407	178.443	615.542	2918.88	15.3024	19.4852	134.198	477.057	26.5335	10.5696	5.50601	0.459889	1090.33	4689.36	289.558	11.757	340.156	14.981
7000700502	PSP	45.8807	-72.0189	B	86	6	8	139	B	Deciduous	Marine and littoral	Thick	Somewhat poorly drained	4	2	2east	2b	40.7039	136.141	204.066	1987.19	269.115	179.462	603.981	2936.19	15.53	19.7052	133.974	484.278	25.3042	11.0399	5.77757	0.557063	1049.21	4691.5	265.162	12.3442	332.437	15.7394
7000700502	PSP	45.8807	-72.0189	C	77	15	8	139	B	Deciduous	Marine and littoral	Thick	Somewhat poorly drained	4	2	2east	2b	40.7039	136.141	204.066	1987.19	269.115	179.462	603.981	2936.19	15.53	19.7052	133.974	484.278	25.3042	11.0399	5.77757	0.557063	1049.21	4691.5	265.162	12.3442	332.437	15.7394
7000700602	PSP	45.9183	-71.9253	B	51	30	19	224	C	Deciduous	Glacial without particular morphology	Thick	Somewhat poorly drained	1	2	2east	2c	32.061	133.31	202.618	1904.35	267.076	179.105	633.551	2921.41	15.1234	19.3143	134.769	473.689	27.42	10.3427	5.37163	0.392535	1134.91	4683.21	310.858	11.4413	348.234	14.5611
7000700602	PSP	45.9183	-71.9253	C	62	29	9	224	C	Deciduous	Glacial without particular morphology	Thick	Somewhat poorly drained	1	2	2east	2c	32.061	133.31	202.618	1904.35	267.076	179.105	633.551	2921.41	15.1234	19.3143	134.769	473.689	27.42	10.3427	5.37163	0.392535	1134.91	4683.21	310.858	11.4413	348.234	14.5611
7000700701	PSP	46.0993	-71.9502	B	75	17	8	140	B	Mixed	Marine and littoral	Thick	Moderately well drained	2	2	2east	2b	35.3116	122.91	196.24	1845.39	261.309	170.797	578.133	2880.47	15.1812	19.0546	139.398	467.171	27.9314	10.4462	5.00544	-0.393164	1093.71	4761.87	304.981	12.359	328.646	15.6352
7000700701	PSP	46.0993	-71.9502	C	69	17	14	140	B	Mixed	Marine and littoral	Thick	Moderately well drained	2	2	2east	2b	35.3116	122.91	196.24	1845.39	261.309	170.797	578.133	2880.47	15.1812	19.0546	139.398	467.171	27.9314	10.4462	5.00544	-0.393164	1093.71	4761.87	304.981	12.359	328.646	15.6352
7000700702	PSP	46.0946	-71.9502	B	75	12	13	140	A	Deciduous	Glacial without particular morphology	Thick	Somewhat poorly drained	2	2	2east	2b	35.3116	122.91	196.24	1845.39	261.309	170.797	578.133	2880.47	15.1812	19.0546	139.398	467.171	27.9314	10.4462	5.00544	-0.393164	1093.71	4761.87	304.981	12.359	328.646	15.6352
7000700702	PSP	46.0946	-71.9502	C	82	11	7	140	A	Deciduous	Glacial without particular morphology	Thick	Somewhat poorly drained	2	2	2east	2b	35.3116	122.91	196.24	1845.39	261.309	170.797	578.133	2880.47	15.1812	19.0546	139.398	467.171	27.9314	10.4462	5.00544	-0.393164	1093.71	4761.87	304.981	12.359	328.646	15.6352
7000700801	PSP	46.1157	-72.2164	B	73	18	9	100	A	Mixed	Marine and littoral	Thick	Somewhat poorly drained	1	2	2east	2b	44.3541	117.91	191.588	1803.04	258.014	168.415	534.812	2897.29	15.0873	18.9935	141.105	462.249	27.2002	10.404	4.67725	-1.14286	1009.1	4807.65	274.642	12.9023	305.895	16.1518
7000700801	PSP	46.1157	-72.2164	C	81	10	9	100	A	Mixed	Marine and littoral	Thick	Somewhat poorly drained	1	2	2east	2b	44.3541	117.91	191.588	1803.04	258.014	168.415	534.812	2897.29	15.0873	18.9935	141.105	462.249	27.2002	10.404	4.67725	-1.14286	1009.1	4807.65	274.642	12.9023	305.895	16.1518
7000700802	PSP	46.1188	-72.2197	B	87	4	9	97	A	Mixed	Marine and littoral	Thick	Somewhat poorly drained	2	2	2east	2b	46.7415	119.762	193.231	1827.81	258.928	169.966	538.577	2915.19	15.1445	19.0992	140.163	465.332	26.9827	10.4968	4.79761	-1.01	1010.6	4801.36	272.661	12.8049	305.277	16.1104
7000700802	PSP	46.1188	-72.2197	C	81	12	7	97	A	Mixed	Marine and littoral	Thick	Somewhat poorly drained	2	2	2east	2b	46.7415	119.762	193.231	1827.81	258.928	169.966	538.577	2915.19	15.1445	19.0992	140.163	465.332	26.9827	10.4968	4.79761	-1.01	1010.6	4801.36	272.661	12.8049	305.277	16.1104
7000700901	PSP	46.1506	-71.915	B	83	10	7	144	A	Mixed	Marine and littoral	Thick	Somewhat poorly drained	2	2	2east	2b	37.7966	113.043	190.854	1772.65	256.185	163.095	544.834	2811.16	15.1133	18.7297	144.142	459.398	28.248	10.3906	4.63335	-1.15786	1075.29	4823.04	303.063	12.8833	320.585	16.1809
7000700901	PSP	46.1506	-71.915	C	96	2	2	144	A	Mixed	Marine and littoral	Thick	Somewhat poorly drained	2	2	2east	2b	37.7966	113.043	190.854	1772.65	256.185	163.095	544.834	2811.16	15.1133	18.7297	144.142	459.398	28.248	10.3906	4.63335	-1.15786	1075.29	4823.04	303.063	12.8833	320.585	16.1809
7000701001	PSP	46.1667	-72.1825	B	85	9	6	90	A	Coniferous	Marine and littoral	Thick	Somewhat poorly drained	4	2	2east	2b	48.8651	110.061	186.31	1754.5	254.157	161.574	499.442	2855.24	15.1343	18.8281	145.092	456.456	28.7489	10.306	4.33394	-1.66504	999.899	4875.16	287.292	13.2126	294.991	16.3755
7000701001	PSP	46.1667	-72.1825	C	80	11	9	90	A	Coniferous	Marine and littoral	Thick	Somewhat poorly drained	4	2	2east	2b	48.8651	110.061	186.31	1754.5	254.157	161.574	499.442	2855.24	15.1343	18.8281	145.092	456.456	28.7489	10.306	4.33394	-1.66504	999.899	4875.16	287.292	13.2126	294.991	16.3755
7000701002	PSP	46.1676	-72.1773	B	91	4	5	91	B	Mixed	Marine and littoral	Thick	Moderately well drained	2	2	2east	2b	47.5075	110.598	188.738	1782.91	254.469	164.789	513.272	2876.87	15.136	18.9233	144.866	459.618	28.3405	10.3714	4.49358	-1.74089	1011.41	4851.65	287.239	13.2397	301.671	16.4144
7000701002	PSP	46.1676	-72.1773	C	87	8	5	91	B	Mixed	Marine and littoral	Thick	Moderately well drained	2	2	2east	2b	47.5075	110.598	188.738	1782.91	254.469	164.789	513.272	2876.87	15.136	18.9233	144.866	459.618	28.3405	10.3714	4.49358	-1.74089	1011.41	4851.65	287.239	13.2397	301.671	16.4144
7000701101	PSP	46.2159	-71.7497	B	26	32	42	195	C	Mixed	Slope and in situ weathered	Medium	Somewhat poorly drained	2	3	3east	3d	30.3491	115.019	190.562	1746.86	258.618	167.741	595.718	2859.91	14.8183	18.7094	144.598	455.635	29.2421	10.0134	4.52935	-0.968945	1144.28	4811.93	334.229	12.2172	343.596	15.2856
7000701101	PSP	46.2159	-71.7497	C	33	40	27	195	C	Mixed	Slope and in situ weathered	Medium	Somewhat poorly drained	2	3	3east	3d	30.3491	115.019	190.562	1746.86	258.618	167.741	595.718	2859.91	14.8183	18.7094	144.598	455.635	29.2421	10.0134	4.52935	-0.968945	1144.28	4811.93	334.229	12.2172	343.596	15.2856
7000701102	PSP	46.219	-71.753	B	33	49	18	191	B	Deciduous	Slope and in situ weathered	Medium	Moderately well drained	2	3	3east	3d	31.6236	114.036	190.023	1749.52	258.037	166.91	586.159	2853.48	14.8622	18.7364	144.998	455.843	29.2826	10.0511	4.50414	-1.03422	1132.32	4818.73	331.677	12.4108	339.674	15.5452
7000701102	PSP	46.219	-71.753	C	48	40	12	191	B	Deciduous	Slope and in situ weathered	Medium	Moderately well drained	2	3	3east	3d	31.6236	114.036	190.023	1749.52	258.037	166.91	586.159	2853.48	14.8622	18.7364	144.998	455.843	29.2826	10.0511	4.50414	-1.03422	1132.32	4818.73	331.677	12.4108	339.674	15.5452
7000701201	PSP	46.2327	-71.8979	B	76	15	9	127	A	Mixed	Marine and littoral	Thick	Moderately well drained	2	2	2east	2b	37.2118	104.285	187.51	1735.57	252.808	166.234	549.707	2889.43	14.7974	18.5885	149.52	455.205	29.0778	10.3551	4.40393	-1.53152	1078.42	4855.24	313.243	13.173	317.691	16.5814
7000701201	PSP	46.2327	-71.8979	C	75	14	11	127	A	Mixed	Marine and littoral	Thick	Moderately well drained	2	2	2east	2b	37.2118	104.285	187.51	1735.57	252.808	166.234	549.707	2889.43	14.7974	18.5885	149.52	455.205	29.0778	10.3551	4.40393	-1.53152	1078.42	4855.24	313.243	13.173	317.691	16.5814
7000701202	PSP	46.2363	-71.9018	B	83	8	9	120	A	Coniferous	Marine and littoral	Thick	Poorly drained	2	2	2east	2b	37.8001	104.94	188.825	1754.13	253.001	165.73	550.224	2863.37	14.9066	18.7163	149.062	457.209	28.9892	10.3724	4.48663	-1.58419	1077.22	4842.42	312.635	13.2293	318.764	16.6498
7000701202	PSP	46.2363	-71.9018	C	96	2	2	120	A	Coniferous	Marine and littoral	Thick	Poorly drained	2	2	2east	2b	37.8001	104.94	188.825	1754.13	253.001	165.73	550.224	2863.37	14.9066	18.7163	149.062	457.209	28.9892	10.3724	4.48663	-1.58419	1077.22	4842.42	312.635	13.2293	318.764	16.6498
7000701301	PSP	46.2506	-71.5654	B	35	39	26	250	B	Coniferous	Glacial without particular morphology	Medium	Somewhat poorly drained	3	3	3east	3d	26.222	123.897	193.261	1749.88	263.451	171.858	637.849	2880.64	14.6758	18.739	140.554	455.107	30.3262	9.64507	4.57612	-0.446748	1202.97	4777.61	364.805	11.3326	362.583	14.1783
7000701301	PSP	46.2506	-71.5654	C	49	41	10	250	B	Coniferous	Glacial without particular morphology	Medium	Somewhat poorly drained	3	3	3east	3d	26.222	123.897	193.261	1749.88	263.451	171.858	637.849	2880.64	14.6758	18.739	140.554	455.107	30.3262	9.64507	4.57612	-0.446748	1202.97	4777.61	364.805	11.3326	362.583	14.1783
7000701402	PSP	46.2804	-72.3822	B	87	6	7	51	A	Mixed	Marine and littoral	Thick	Poorly drained	4	2	2east	2b	59.0623	134.182	196.418	1819.2	265.995	179.146	561.526	3050.36	14.7874	19.445	132.814	464.858	28.7074	10.1293	4.77325	-0.56815	1024.47	4815.33	293.435	12.3412	295.732	15.8343
7000701402	PSP	46.2804	-72.3822	C	95	2	3	51	A	Mixed	Marine and littoral	Thick	Poorly drained	4	2	2east	2b	59.0623	134.182	196.418	1819.2	265.995	179.146	561.526	3050.36	14.7874	19.445	132.814	464.858	28.7074	10.1293	4.77325	-0.56815	1024.47	4815.33	293.435	12.3412	295.732	15.8343
7000701501	PSP	46.3003	-72.0157	B	69	23	8	106	A	Coniferous	Marine and littoral	Thick	Poorly drained	8	2	2east	2b	37.2538	107.727	188.175	1750.69	253.545	158.995	524.749	2789.6	15.179	18.6753	146.817	457.219	30.2181	10.5299	4.49881	-1.52582	1105.45	4890.96	334.185	13.5348	318.283	17.0378
7000701501	PSP	46.3003	-72.0157	B	72	20	8	106	A	Coniferous	Marine and littoral	Thick	Poorly drained	8	2	2east	2b	37.2538	107.727	188.175	1750.69	253.545	158.995	524.749	2789.6	15.179	18.6753	146.817	457.219	30.2181	10.5299	4.49881	-1.52582	1105.45	4890.96	334.185	13.5348	318.283	17.0378
7000701501	PSP	46.3003	-72.0157	C	71	23	6	106	A	Coniferous	Marine and littoral	Thick	Poorly drained	8	2	2east	2b	37.2538	107.727	188.175	1750.69	253.545	158.995	524.749	2789.6	15.179	18.6753	146.817	457.219	30.2181	10.5299	4.49881	-1.52582	1105.45	4890.96	334.185	13.5348	318.283	17.0378
7000701501	PSP	46.3003	-72.0157	C	71	21	8	106	A	Coniferous	Marine and littoral	Thick	Poorly drained	8	2	2east	2b	37.2538	107.727	188.175	1750.69	253.545	158.995	524.749	2789.6	15.179	18.6753	146.817	457.219	30.2181	10.5299	4.49881	-1.52582	1105.45	4890.96	334.185	13.5348	318.283	17.0378
7000701502	PSP	46.304	-72.0155	B	93	5	2	103	A	Mixed	Marine and littoral	Thick	Somewhat poorly drained	2	2	2east	2b	37.6028	107.526	188.187	1749.99	253.727	159.779	525.677	2788.25	15.1503	18.6726	147.198	456.984	29.623	10.4576	4.48035	-1.54648	1091.18	4868.61	322.972	13.4799	316.425	16.9598
7000701502	PSP	46.304	-72.0155	C	87	7	6	103	A	Mixed	Marine and littoral	Thick	Somewhat poorly drained	2	2	2east	2b	37.6028	107.526	188.187	1749.99	253.727	159.779	525.677	2788.25	15.1503	18.6726	147.198	456.984	29.623	10.4576	4.48035	-1.54648	1091.18	4868.61	322.972	13.4799	316.425	16.9598
7000701602	PSP	46.3141	-71.6027	B	50	36	14	160	A	Coniferous	Marine and littoral	Thick	Somewhat poorly drained	4	2	2east	2b	28.9956	121.331	192.854	1807.32	262.256	171.039	625.572	2861.12	15.0247	19.1527	141.925	462.295	28.6234	10.1131	4.81483	-0.436921	1158.29	4757.82	330.806	12.0992	355.454	15.1533
7000701602	PSP	46.3141	-71.6027	C	58	28	14	160	A	Coniferous	Marine and littoral	Thick	Somewhat poorly drained	4	2	2east	2b	28.9956	121.331	192.854	1807.32	262.256	171.039	625.572	2861.12	15.0247	19.1527	141.925	462.295	28.6234	10.1131	4.81483	-0.436921	1158.29	4757.82	330.806	12.0992	355.454	15.1533
7000701701	PSP	46.3172	-71.8822	B	88	4	8	117	A	Mixed	Marine and littoral	Thick	Somewhat poorly drained	4	2	2east	2b	37.4695	105.794	188.012	1735.46	253.545	166.753	557.504	2880.45	14.7963	18.6572	148.75	454.528	29.4163	10.1281	4.31662	-1.51495	1089.28	4832.63	320.504	12.8319	319.673	16.2857
7000701701	PSP	46.3172	-71.8822	C	92	5	3	117	A	Mixed	Marine and littoral	Thick	Somewhat poorly drained	4	2	2east	2b	37.4695	105.794	188.012	1735.46	253.545	166.753	557.504	2880.45	14.7963	18.6572	148.75	454.528	29.4163	10.1281	4.31662	-1.51495	1089.28	4832.63	320.504	12.8319	319.673	16.2857
7000701702	PSP	46.3209	-71.8815	B	90	2	8	119	A	Coniferous	Marine and littoral	Thick	Somewhat poorly drained	5	2	2east	2b	37.4695	105.794	188.012	1735.46	253.545	166.753	557.504	2880.45	14.7963	18.6572	148.75	454.528	29.4163	10.1281	4.31662	-1.51495	1089.28	4832.63	320.504	12.8319	319.673	16.2857
7000701702	PSP	46.3209	-71.8815	C	90	6	4	119	A	Coniferous	Marine and littoral	Thick	Somewhat poorly drained	5	2	2east	2b	37.4695	105.794	188.012	1735.46	253.545	166.753	557.504	2880.45	14.7963	18.6572	148.75	454.528	29.4163	10.1281	4.31662	-1.51495	1089.28	4832.63	320.504	12.8319	319.673	16.2857
7000701801	PSP	46.3169	-72.1142	B	60	26	14	97	A	Mixed	Marine and littoral	Thick	Somewhat poorly drained	2	2	2east	2b	37.9638	110.308	188.793	1766.7	254.338	160.453	525.027	2819.01	15.2092	18.7477	145.03	459.174	30.424	10.6397	4.59321	-1.45632	1107.87	4902.8	337.095	13.7647	317.121	17.2083
7000701801	PSP	46.3169	-72.1142	C	58	32	10	97	A	Mixed	Marine and littoral	Thick	Somewhat poorly drained	2	2	2east	2b	37.9638	110.308	188.793	1766.7	254.338	160.453	525.027	2819.01	15.2092	18.7477	145.03	459.174	30.424	10.6397	4.59321	-1.45632	1107.87	4902.8	337.095	13.7647	317.121	17.2083
7000701802	PSP	46.3138	-72.111	B	68	24	8	96	A	Coniferous	Marine and littoral	Thick	Somewhat poorly drained	2	2	2east	2b	37.9638	110.308	188.793	1766.7	254.338	160.453	525.027	2819.01	15.2092	18.7477	145.03	459.174	30.424	10.6397	4.59321	-1.45632	1107.87	4902.8	337.095	13.7647	317.121	17.2083
7000701802	PSP	46.3138	-72.111	C	68	26	6	96	A	Coniferous	Marine and littoral	Thick	Somewhat poorly drained	2	2	2east	2b	37.9638	110.308	188.793	1766.7	254.338	160.453	525.027	2819.01	15.2092	18.7477	145.03	459.174	30.424	10.6397	4.59321	-1.45632	1107.87	4902.8	337.095	13.7647	317.121	17.2083
7000701901	PSP	46.3336	-71.565	B	90	7	3	160	A	Mixed	Marine and littoral	Thick	Somewhat poorly drained	6	2	2east	2b	29.6054	121.874	192.888	1812.33	262.415	171.25	619.184	2859.54	15.0437	19.1226	141.541	462.41	28.6126	10.1088	4.81503	-0.479053	1144.79	4748.75	327.066	12.1279	353.713	15.1951
7000701901	PSP	46.3336	-71.565	C	94	4	2	160	A	Mixed	Marine and littoral	Thick	Somewhat poorly drained	6	2	2east	2b	29.6054	121.874	192.888	1812.33	262.415	171.25	619.184	2859.54	15.0437	19.1226	141.541	462.41	28.6126	10.1088	4.81503	-0.479053	1144.79	4748.75	327.066	12.1279	353.713	15.1951
7000701902	PSP	46.3367	-71.5683	B	81	10	9	160	A	Mixed	Marine and littoral	Thick	Moderately well drained	2	2	2east	2b	29.4573	121.835	192.644	1792.54	262.391	171.437	617.807	2870.1	14.9485	19.0458	141.556	460.474	28.9721	10.0019	4.71584	-0.475115	1144.61	4753.01	330.917	12.1279	349.656	15.2026
7000701902	PSP	46.3367	-71.5683	B	90	6	4	160	A	Mixed	Marine and littoral	Thick	Moderately well drained	2	2	2east	2b	29.4573	121.835	192.644	1792.54	262.391	171.437	617.807	2870.1	14.9485	19.0458	141.556	460.474	28.9721	10.0019	4.71584	-0.475115	1144.61	4753.01	330.917	12.1279	349.656	15.2026
7000701902	PSP	46.3367	-71.5683	C	86	6	8	160	A	Mixed	Marine and littoral	Thick	Moderately well drained	2	2	2east	2b	29.4573	121.835	192.644	1792.54	262.391	171.437	617.807	2870.1	14.9485	19.0458	141.556	460.474	28.9721	10.0019	4.71584	-0.475115	1144.61	4753.01	330.917	12.1279	349.656	15.2026
7000701902	PSP	46.3367	-71.5683	C	92	4	4	160	A	Mixed	Marine and littoral	Thick	Moderately well drained	2	2	2east	2b	29.4573	121.835	192.644	1792.54	262.391	171.437	617.807	2870.1	14.9485	19.0458	141.556	460.474	28.9721	10.0019	4.71584	-0.475115	1144.61	4753.01	330.917	12.1279	349.656	15.2026
7000702001	PSP	46.3344	-72.3499	B	91	6	3	32	A	Mixed	Marine and littoral	Thick	Somewhat poorly drained	2	2	2east	2b	57.6797	136.28	198.352	1858.06	267.427	180.423	572.977	3025.76	14.9243	19.6055	132.146	468.898	28.3943	10.2019	4.93071	-0.464496	1038.11	4774.02	293.916	12.2714	301.361	15.8075
7000702001	PSP	46.3344	-72.3499	C	61	25	14	32	A	Mixed	Marine and littoral	Thick	Somewhat poorly drained	2	2	2east	2b	57.6797	136.28	198.352	1858.06	267.427	180.423	572.977	3025.76	14.9243	19.6055	132.146	468.898	28.3943	10.2019	4.93071	-0.464496	1038.11	4774.02	293.916	12.2714	301.361	15.8075
7000702101	PSP	46.3997	-72.0159	B	93	3	4	87	A	Coniferous	Marine and littoral	Thick	Moderately well drained	2	2	2east	2b	39.328	107.887	188.108	1740.57	253.985	167.768	550.495	2900.81	14.7935	18.7285	147.098	455.234	29.4959	10.1621	4.32812	-1.5088	1073.19	4830.85	316.476	13.0127	311.572	16.5542
7000702101	PSP	46.3997	-72.0159	C	78	14	8	87	A	Coniferous	Marine and littoral	Thick	Moderately well drained	2	2	2east	2b	39.328	107.887	188.108	1740.57	253.985	167.768	550.495	2900.81	14.7935	18.7285	147.098	455.234	29.4959	10.1621	4.32812	-1.5088	1073.19	4830.85	316.476	13.0127	311.572	16.5542
7000702102	PSP	46.4027	-72.0125	B	85	8	7	82	B	Coniferous	Marine and littoral	Thick	Moderately well drained	2	2	2east	2b	39.027	110.932	189.811	1760.69	255.344	168.341	557.077	2895.04	14.873	18.8213	145.409	457.635	29.2858	10.2053	4.44466	-1.37197	1082.05	4815.82	317.246	12.9565	316.458	16.4609
7000702102	PSP	46.4027	-72.0125	C	96	3	1	82	B	Coniferous	Marine and littoral	Thick	Moderately well drained	2	2	2east	2b	39.027	110.932	189.811	1760.69	255.344	168.341	557.077	2895.04	14.873	18.8213	145.409	457.635	29.2858	10.2053	4.44466	-1.37197	1082.05	4815.82	317.246	12.9565	316.458	16.4609
7000702201	PSP	46.4164	-71.6156	B	86	13	1	134	B	Coniferous	Marine and littoral	Thick	Somewhat poorly drained	5	2	2east	2b	28.3176	123.532	193.089	1792.02	262.105	173.763	620.39	2891.91	14.8718	19.1249	139.573	460.248	28.9554	9.9264	4.65359	-0.619147	1134.52	4734.35	328.387	12.1243	347.354	15.3937
7000702201	PSP	46.4164	-71.6156	C	84	9	7	134	B	Coniferous	Marine and littoral	Thick	Somewhat poorly drained	5	2	2east	2b	28.3176	123.532	193.089	1792.02	262.105	173.763	620.39	2891.91	14.8718	19.1249	139.573	460.248	28.9554	9.9264	4.65359	-0.619147	1134.52	4734.35	328.387	12.1243	347.354	15.3937
7000702202	PSP	46.4194	-71.619	B	50	21	29	131	A	Coniferous	Marine and littoral	Thick	Poorly drained	8	2	2east	2b	28.5345	123.32	193.002	1783.17	262.068	173.175	615.662	2886.18	14.8485	19.0675	139.748	459.4	28.8756	9.90314	4.63221	-0.639977	1129.14	4736.36	325.545	12.1136	344.466	15.3685
7000702202	PSP	46.4194	-71.619	C	73	17	10	131	A	Coniferous	Marine and littoral	Thick	Poorly drained	8	2	2east	2b	28.5345	123.32	193.002	1783.17	262.068	173.175	615.662	2886.18	14.8485	19.0675	139.748	459.4	28.8756	9.90314	4.63221	-0.639977	1129.14	4736.36	325.545	12.1136	344.466	15.3685
7000702301	PSP	46.4163	-71.8492	B	94	2	4	120	A	Mixed	Marine and littoral	Thick	Moderately well drained	2	2	2east	2b	33.6686	113.378	188.708	1746.85	257.053	166.414	577.762	2862.35	14.91	18.8148	144.673	455.66	29.215	10.0319	4.38575	-1.27182	1110.57	4816.3	324.198	12.6577	330.635	15.9934
7000702301	PSP	46.4163	-71.8492	C	89	5	6	120	A	Mixed	Marine and littoral	Thick	Moderately well drained	2	2	2east	2b	33.6686	113.378	188.708	1746.85	257.053	166.414	577.762	2862.35	14.91	18.8148	144.673	455.66	29.215	10.0319	4.38575	-1.27182	1110.57	4816.3	324.198	12.6577	330.635	15.9934
7000702302	PSP	46.4195	-71.8522	B	71	21	8	120	A	Deciduous	Marine and littoral	Thick	Somewhat poorly drained	5	2	2east	2b	35.2899	113.921	189.066	1744.3	257.163	168.016	566.033	2866.98	14.8291	18.853	144.245	455.559	28.3388	9.94533	4.32599	-1.40694	1056.57	4796.24	301.175	12.7304	319.244	16.0503
7000702302	PSP	46.4195	-71.8522	C	78	16	6	120	A	Deciduous	Marine and littoral	Thick	Somewhat poorly drained	5	2	2east	2b	35.2899	113.921	189.066	1744.3	257.163	168.016	566.033	2866.98	14.8291	18.853	144.245	455.559	28.3388	9.94533	4.32599	-1.40694	1056.57	4796.24	301.175	12.7304	319.244	16.0503
7000702401	PSP	46.449	-71.6995	B	62	26	12	118	A	Deciduous	Marine and littoral	Thick	Somewhat poorly drained	5	2	2east	2b	28.5058	124.049	193.317	1790.01	262.372	174.217	619.595	2893.05	14.8432	19.1451	139.324	460.243	28.5749	9.89721	4.63296	-0.65096	1122.27	4724.88	320.583	12.0988	343.286	15.3853
7000702401	PSP	46.449	-71.6995	C	62	30	8	118	A	Deciduous	Marine and littoral	Thick	Somewhat poorly drained	5	2	2east	2b	28.5058	124.049	193.317	1790.01	262.372	174.217	619.595	2893.05	14.8432	19.1451	139.324	460.243	28.5749	9.89721	4.63296	-0.65096	1122.27	4724.88	320.583	12.0988	343.286	15.3853
7000702402	PSP	46.4522	-71.7023	B	73	20	7	111	A	Deciduous	Marine and littoral	Thick	Somewhat poorly drained	4	2	2east	2b	29.2505	125.729	193.641	1787.42	262.844	174.482	613.382	2900.24	14.8341	19.1659	138.113	460.283	28.2821	9.91469	4.62645	-0.61529	1105.73	4721.56	312.547	12.0662	337.866	15.4615
7000702402	PSP	46.4522	-71.7023	C	73	18	9	111	A	Deciduous	Marine and littoral	Thick	Somewhat poorly drained	4	2	2east	2b	29.2505	125.729	193.641	1787.42	262.844	174.482	613.382	2900.24	14.8341	19.1659	138.113	460.283	28.2821	9.91469	4.62645	-0.61529	1105.73	4721.56	312.547	12.0662	337.866	15.4615
7000702501	PSP	46.4843	-71.8338	B	74	19	7	88	A	Coniferous	Marine and littoral	Thick	Somewhat poorly drained	5	2	2east	2b	30.0462	127.704	194.412	1769.58	263.438	175.536	613.72	2918.87	14.6979	19.0471	136.735	459.151	27.8143	9.87421	4.56057	-0.692479	1097.08	4721.11	304.328	12.1316	331.657	15.6419
7000702501	PSP	46.4843	-71.8338	C	82	12	6	88	A	Coniferous	Marine and littoral	Thick	Somewhat poorly drained	5	2	2east	2b	30.0462	127.704	194.412	1769.58	263.438	175.536	613.72	2918.87	14.6979	19.0471	136.735	459.151	27.8143	9.87421	4.56057	-0.692479	1097.08	4721.11	304.328	12.1316	331.657	15.6419
7000702601	PSP	46.483	-71.8637	B	63	27	10	90	A	Coniferous	Glacial without particular morphology	Thick	Moderately well drained	2	2	2east	2b	32.2593	125.614	194.258	1779.89	262.185	174.744	601.569	2916.12	14.7756	19.0244	137.577	460.326	28.0273	9.9461	4.60806	-0.77087	1088.44	4733.05	305.094	12.2372	325.75	15.7
7000702601	PSP	46.483	-71.8637	C	75	16	9	90	A	Coniferous	Glacial without particular morphology	Thick	Moderately well drained	2	2	2east	2b	32.2593	125.614	194.258	1779.89	262.185	174.744	601.569	2916.12	14.7756	19.0244	137.577	460.326	28.0273	9.9461	4.60806	-0.77087	1088.44	4733.05	305.094	12.2372	325.75	15.7
7000702601	PSP	46.483	-71.8637	C	84	8	8	90	A	Coniferous	Glacial without particular morphology	Thick	Moderately well drained	2	2	2east	2b	32.2593	125.614	194.258	1779.89	262.185	174.744	601.569	2916.12	14.7756	19.0244	137.577	460.326	28.0273	9.9461	4.60806	-0.77087	1088.44	4733.05	305.094	12.2372	325.75	15.7
7000702602	PSP	46.484	-71.8585	B	62	22	16	90	A	Coniferous	Marine and littoral	Thick	Somewhat poorly drained	5	2	2east	2b	30.584	126.912	194.147	1772.76	262.898	174.63	610.812	2913.09	14.7454	19.0255	136.988	459.533	27.994	9.9161	4.57654	-0.68773	1101.91	4730.54	308.005	12.1361	332.373	15.6533
7000702602	PSP	46.484	-71.8585	C	91	5	5	90	A	Coniferous	Marine and littoral	Thick	Somewhat poorly drained	5	2	2east	2b	30.584	126.912	194.147	1772.76	262.898	174.63	610.812	2913.09	14.7454	19.0255	136.988	459.533	27.994	9.9161	4.57654	-0.68773	1101.91	4730.54	308.005	12.1361	332.373	15.6533
7000702602	PSP	46.484	-71.8585	C	94	2	4	90	A	Coniferous	Marine and littoral	Thick	Somewhat poorly drained	5	2	2east	2b	30.584	126.912	194.147	1772.76	262.898	174.63	610.812	2913.09	14.7454	19.0255	136.988	459.533	27.994	9.9161	4.57654	-0.68773	1101.91	4730.54	308.005	12.1361	332.373	15.6533
7002500101	PSP	51.2744	-75.2979	B	74	25	1	340	C	Coniferous	Glacial without particular morphology	Medium	Moderately well drained	1	6	6west	6d	19.955	79.3408	150.5	1157.37	244.063	127.733	441.071	2209.92	13.1863	15.5456	165.721	371.348	35.5201	5.00264	-0.565673	-6.14035	955.28	4653.83	338.609	11.6619	313.963	13.9248
7002500101	PSP	51.2744	-75.2979	C	83	13	4	340	C	Coniferous	Glacial without particular morphology	Medium	Moderately well drained	1	6	6west	6d	19.955	79.3408	150.5	1157.37	244.063	127.733	441.071	2209.92	13.1863	15.5456	165.721	371.348	35.5201	5.00264	-0.565673	-6.14035	955.28	4653.83	338.609	11.6619	313.963	13.9248
7002500102	PSP	51.2775	-75.2946	B	85	15	0	320	C	Coniferous	Proglacial	Thick	Well drained	2	6	6west	6d	20.2078	80.496	151.379	1165.51	245.094	128.191	442.275	2211.76	13.2146	15.5607	165.598	372.669	35.2561	5.06897	-0.501768	-6.06143	952.752	4644.61	334.948	11.7028	313.583	14.0133
7002500102	PSP	51.2775	-75.2946	C	97	3	0	320	C	Coniferous	Proglacial	Thick	Well drained	2	6	6west	6d	20.2078	80.496	151.379	1165.51	245.094	128.191	442.275	2211.76	13.2146	15.5607	165.598	372.669	35.2561	5.06897	-0.501768	-6.06143	952.752	4644.61	334.948	11.7028	313.583	14.0133
7002500201	PSP	51.3509	-75.5337	B	89	8	3	320	A	Coniferous	Proglacial	Thick	Well drained	1	6	6west	6d	19.6195	76.8935	149.643	1136.88	243.236	126.332	435.628	2185.75	13.0984	15.3988	167.342	369.284	35.4528	4.90028	-0.643213	-6.17394	949.715	4641.58	335.776	11.5139	313.563	13.7576
7002500201	PSP	51.3509	-75.5337	C	98	1	1	320	A	Coniferous	Proglacial	Thick	Well drained	1	6	6west	6d	19.6195	76.8935	149.643	1136.88	243.236	126.332	435.628	2185.75	13.0984	15.3988	167.342	369.284	35.4528	4.90028	-0.643213	-6.17394	949.715	4641.58	335.776	11.5139	313.563	13.7576
7002500202	PSP	51.3478	-75.5374	B	95	4	1	320	A	Coniferous	Proglacial	Thick	Well drained	1	6	6west	6d	19.5377	76.8942	149.849	1136.65	243.154	126.834	438.381	2186.81	13.0696	15.3874	167.26	369.313	35.4933	4.89144	-0.643534	-6.17869	951.409	4641.3	336.896	11.5015	313.683	13.7449
7002500202	PSP	51.3478	-75.5374	C	98	1	1	320	A	Coniferous	Proglacial	Thick	Well drained	1	6	6west	6d	19.5377	76.8942	149.849	1136.65	243.154	126.834	438.381	2186.81	13.0696	15.3874	167.26	369.313	35.4933	4.89144	-0.643534	-6.17869	951.409	4641.3	336.896	11.5015	313.683	13.7449
7002500301	PSP	51.4006	-74.7481	B	68	28	4	320	C	Coniferous	Glacial without particular morphology	Thick	Moderately well drained	2	6	6west	6d	19.9563	83.0555	151.169	1158.09	247.084	128.38	445.587	2211.23	13.1729	15.5224	165.025	372.223	35.0932	5.06077	-0.536564	-6.15919	949.408	4628.77	332.306	11.6482	316.434	13.9531
7002500301	PSP	51.4006	-74.7481	C	61	35	4	320	C	Coniferous	Glacial without particular morphology	Thick	Moderately well drained	2	6	6west	6d	19.9563	83.0555	151.169	1158.09	247.084	128.38	445.587	2211.23	13.1729	15.5224	165.025	372.223	35.0932	5.06077	-0.536564	-6.15919	949.408	4628.77	332.306	11.6482	316.434	13.9531
7002500302	PSP	51.4038	-74.7446	B	71	25	4	320	B	Coniferous	Glacial without particular morphology	Thick	Somewhat poorly drained	5	6	6west	6d	19.9563	83.0555	151.169	1158.09	247.084	128.38	445.587	2211.23	13.1729	15.5224	165.025	372.223	35.0932	5.06077	-0.536564	-6.15919	949.408	4628.77	332.306	11.6482	316.434	13.9531
7002500302	PSP	51.4038	-74.7446	C	74	22	4	320	B	Coniferous	Glacial without particular morphology	Thick	Somewhat poorly drained	5	6	6west	6d	19.9563	83.0555	151.169	1158.09	247.084	128.38	445.587	2211.23	13.1729	15.5224	165.025	372.223	35.0932	5.06077	-0.536564	-6.15919	949.408	4628.77	332.306	11.6482	316.434	13.9531
7009300101	PSP	47.3839	-71.1824	B	60	32	8	901	E	Coniferous	Glacial without particular morphology	Thin	Moderately well drained	5	5	5east	5e	9.38768	49.1942	134.859	917.25	226.841	107.874	450.765	2232.11	12.1576	13.5688	178.647	352.692	44.2102	5.67766	-0.330861	-6.34459	1412.82	5479.57	625.822	10.8013	386.206	12.5196
7009300102	PSP	47.3806	-71.1793	B	80	12	8	892	D	Coniferous	Glacial without particular morphology	Medium	Moderately well drained	5	5	5east	5e	9.42887	47.5897	132.487	886.928	226.329	102.266	426.474	2128.31	12.1098	13.3726	179.739	348.964	44.3915	5.49674	-0.534959	-6.56744	1388.61	5502.59	617.375	10.7296	382.772	12.3397
7009300201	PSP	47.4493	-70.9145	B	88	4	8	883	C	Coniferous	Glacial without particular morphology	Thick	Somewhat poorly drained	4	5	5east	5e	10.4073	48.6262	132.362	873.259	226.889	111.111	450.376	2308.63	11.7992	13.3212	179.265	346.677	45.0583	5.24004	-0.668424	-6.57616	1362.42	5510.57	614.847	10.5567	374.684	12.035
7009300201	PSP	47.4493	-70.9145	C	82	10	8	883	C	Coniferous	Glacial without particular morphology	Thick	Somewhat poorly drained	4	5	5east	5e	10.4073	48.6262	132.362	873.259	226.889	111.111	450.376	2308.63	11.7992	13.3212	179.265	346.677	45.0583	5.24004	-0.668424	-6.57616	1362.42	5510.57	614.847	10.5567	374.684	12.035
7009300202	PSP	47.4462	-70.9183	B	67	21	12	930	C	Coniferous	Glacial without particular morphology	Medium	Moderately well drained	2	5	5east	5e	10.3879	48.142	132.227	871.845	226.595	110.667	449.384	2293.32	11.8017	13.3213	179.451	346.423	45.0734	5.20931	-0.689234	-6.62561	1359.6	5511.23	613.831	10.5546	374.261	12.0321
7009400101	PSP	48.0333	-70.9832	B	86	9	5	583	D	Mixed	Glacial without particular morphology	Thin	Moderately well drained	5	5	5east	5e	11.5749	62.7874	145.143	1071.04	233.911	122.917	475.633	2310.52	12.7258	14.9833	172.153	368.28	37.6292	6.09447	0.196371	-5.80973	1158.83	5142.82	435.548	11.7072	359.232	13.7391
7009400102	PSP	48.0301	-70.98	B	62	30	8	643	E	Mixed	Glacial without particular morphology	Medium	Well drained	2	5	5east	5e	11.5749	62.7874	145.143	1071.04	233.911	122.917	475.633	2310.52	12.7258	14.9833	172.153	368.28	37.6292	6.09447	0.196371	-5.80973	1158.83	5142.82	435.548	11.7072	359.232	13.7391
7009400102	PSP	48.0301	-70.98	C	81	13	6	643	E	Mixed	Glacial without particular morphology	Medium	Well drained	2	5	5east	5e	11.5749	62.7874	145.143	1071.04	233.911	122.917	475.633	2310.52	12.7258	14.9833	172.153	368.28	37.6292	6.09447	0.196371	-5.80973	1158.83	5142.82	435.548	11.7072	359.232	13.7391
7009400201	PSP	48.0666	-70.7506	B	77	21	2	553	E	Coniferous	Glacial without particular morphology	Medium	Moderately well drained	2	5	5east	5e	13.3297	68.5925	145.348	1088.27	236.406	128.547	465.94	2388.82	12.6854	15.1339	168.814	370.224	37.6601	6.07453	0.147735	-5.75127	1084.68	5118.49	407.882	11.8223	336.044	14.0161
7009400201	PSP	48.0666	-70.7506	C	63	24	13	553	E	Coniferous	Glacial without particular morphology	Medium	Moderately well drained	2	5	5east	5e	13.3297	68.5925	145.348	1088.27	236.406	128.547	465.94	2388.82	12.6854	15.1339	168.814	370.224	37.6601	6.07453	0.147735	-5.75127	1084.68	5118.49	407.882	11.8223	336.044	14.0161
7009400202	PSP	48.0676	-70.7453	B	81	15	4	506	D	Coniferous	Glacial without particular morphology	Thin	Moderately well drained	1	5	5east	5e	15.7912	73.0739	149.538	1144.81	238.17	132.627	468.783	2437.34	12.8865	15.5348	166.095	377.782	36.5243	6.47982	0.515296	-5.46721	1056.09	5063.88	385.141	12.1959	328.469	14.5499
7009400202	PSP	48.0676	-70.7453	C	56	32	12	506	D	Coniferous	Glacial without particular morphology	Thin	Moderately well drained	1	5	5east	5e	15.7912	73.0739	149.538	1144.81	238.17	132.627	468.783	2437.34	12.8865	15.5348	166.095	377.782	36.5243	6.47982	0.515296	-5.46721	1056.09	5063.88	385.141	12.1959	328.469	14.5499
7009400301	PSP	48.167	-71.0169	B	59	27	14	338	C	Mixed	Glacial without particular morphology	Medium	Moderately well drained	2	5	5west	5d	24.7276	92.3181	160.955	1340.52	249.816	144.335	465.115	2575.14	13.6464	16.6298	158.5	402.325	32.6519	7.81134	1.66918	-4.46413	945.613	4908.17	308.27	13.1855	306.789	15.8341
7009400301	PSP	48.167	-71.0169	C	55	28	17	338	C	Mixed	Glacial without particular morphology	Medium	Moderately well drained	2	5	5west	5d	24.7276	92.3181	160.955	1340.52	249.816	144.335	465.115	2575.14	13.6464	16.6298	158.5	402.325	32.6519	7.81134	1.66918	-4.46413	945.613	4908.17	308.27	13.1855	306.789	15.8341
7009400401	PSP	48.1841	-71.0164	B	70	24	6	342	D	Coniferous	Glacial without particular morphology	Medium	Moderately well drained	1	5	5west	5d	23.892	90.6211	159.791	1321.73	248.723	142.003	467.948	2549.52	13.6111	16.5063	159.102	399.917	33.1195	7.68024	1.54098	-4.65016	969.798	4939.97	321.466	13.1935	313.02	15.7097
7009400401	PSP	48.1841	-71.0164	C	70	20	10	342	D	Coniferous	Glacial without particular morphology	Medium	Moderately well drained	1	5	5west	5d	23.892	90.6211	159.791	1321.73	248.723	142.003	467.948	2549.52	13.6111	16.5063	159.102	399.917	33.1195	7.68024	1.54098	-4.65016	969.798	4939.97	321.466	13.1935	313.02	15.7097
7009500101	PSP	47.5162	-71.0829	B	72	20	8	951	D	Coniferous	Glacial without particular morphology	Medium	Moderately well drained	2	5	5east	5e	9.98887	52.8845	135.538	908.068	229.448	108.804	449.564	2202.19	12.0905	13.6003	177.556	349.896	43.6398	5.35947	-0.535015	-6.44365	1355.28	5425.95	591.632	10.5856	379.808	12.1928
7009500101	PSP	47.5162	-71.0829	C	74	18	8	951	D	Coniferous	Glacial without particular morphology	Medium	Moderately well drained	2	5	5east	5e	9.98887	52.8845	135.538	908.068	229.448	108.804	449.564	2202.19	12.0905	13.6003	177.556	349.896	43.6398	5.35947	-0.535015	-6.44365	1355.28	5425.95	591.632	10.5856	379.808	12.1928
7009500102	PSP	47.5129	-71.08	B	70	22	8	876	D	Coniferous	Glacial without particular morphology	Medium	Moderately well drained	2	5	5east	5e	9.98887	52.8845	135.538	908.068	229.448	108.804	449.564	2202.19	12.0905	13.6003	177.556	349.896	43.6398	5.35947	-0.535015	-6.44365	1355.28	5425.95	591.632	10.5856	379.808	12.1928
7009500102	PSP	47.5129	-71.08	C	74	18	8	876	D	Coniferous	Glacial without particular morphology	Medium	Moderately well drained	2	5	5east	5e	9.98887	52.8845	135.538	908.068	229.448	108.804	449.564	2202.19	12.0905	13.6003	177.556	349.896	43.6398	5.35947	-0.535015	-6.44365	1355.28	5425.95	591.632	10.5856	379.808	12.1928
7009500201	PSP	47.7006	-70.8334	B	72	20	8	730	D	Coniferous	Juxtaglacial	Thick	Moderately well drained	2	5	5east	5e	15.221	73.1106	146.192	1030.01	239.518	123.018	454.521	2368.51	12.5336	14.5833	167.405	362.784	41.8248	5.72213	0.117836	-5.5545	1207.51	5245.12	505.824	10.7578	345.489	12.5385
7009500201	PSP	47.7006	-70.8334	C	78	18	4	730	D	Coniferous	Juxtaglacial	Thick	Moderately well drained	2	5	5east	5e	15.221	73.1106	146.192	1030.01	239.518	123.018	454.521	2368.51	12.5336	14.5833	167.405	362.784	41.8248	5.72213	0.117836	-5.5545	1207.51	5245.12	505.824	10.7578	345.489	12.5385
7009500301	PSP	47.7169	-70.8001	B	22	64	14	702	C	Coniferous	Proglacial	Thick	Moderately well drained	2	5	5east	5e	17.1788	78.5555	148.721	1067.89	241.873	125.646	454.299	2393.33	12.7085	14.9234	164.311	367.139	41.0765	5.9534	0.339179	-5.24196	1171.2	5205.25	481.993	10.8297	338.043	12.7872
7009500301	PSP	47.7169	-70.8001	C	14	64	22	702	C	Coniferous	Proglacial	Thick	Moderately well drained	2	5	5east	5e	17.1788	78.5555	148.721	1067.89	241.873	125.646	454.299	2393.33	12.7085	14.9234	164.311	367.139	41.0765	5.9534	0.339179	-5.24196	1171.2	5205.25	481.993	10.8297	338.043	12.7872
7009500302	PSP	47.7179	-70.7953	B	68	25	7	672	C	Coniferous	Proglacial	Thick	Moderately well drained	2	5	5east	5e	18.8572	84.1371	152.483	1111.28	244.908	130.763	460.476	2452.91	12.8074	15.2167	161.771	371.913	40.3157	6.11139	0.584545	-5.0038	1140.39	5151.22	458.719	10.9217	329.104	12.9131
7009500302	PSP	47.7179	-70.7953	C	71	23	6	672	C	Coniferous	Proglacial	Thick	Moderately well drained	2	5	5east	5e	18.8572	84.1371	152.483	1111.28	244.908	130.763	460.476	2452.91	12.8074	15.2167	161.771	371.913	40.3157	6.11139	0.584545	-5.0038	1140.39	5151.22	458.719	10.9217	329.104	12.9131
7009500401	PSP	47.7341	-70.3162	B	80	17	3	184	B	Coniferous	Glacial without particular morphology	Thin to very thin	Well drained	2	4	4east	4d	48.6727	117.584	177.411	1441.55	260.251	162.74	454.287	2801.69	13.5096	17.3873	143.665	418.411	31.6653	8.01698	2.83918	-2.38755	866.207	4752.82	275.706	11.3776	267.868	14.2128
7009500402	PSP	47.7329	-70.3105	B	93	4	3	169	A	Coniferous	Marine and littoral	Thick	Somewhat poorly drained	1	4	4east	4d	51.2531	117.324	178.546	1467.83	260.072	163.644	450.755	2810.41	13.6054	17.5288	143.747	422.218	30.8655	8.26971	3.00605	-2.26046	851.826	4737.08	262.691	11.4875	264.293	14.4551
7009500402	PSP	47.7329	-70.3105	C	86	5	9	169	A	Coniferous	Marine and littoral	Thick	Somewhat poorly drained	1	4	4east	4d	51.2531	117.324	178.546	1467.83	260.072	163.644	450.755	2810.41	13.6054	17.5288	143.747	422.218	30.8655	8.26971	3.00605	-2.26046	851.826	4737.08	262.691	11.4875	264.293	14.4551
7009500502	PSP	47.8707	-70.7141	B	96	4	0	798	E	Coniferous	Slope and in situ weathered	Thick	Well drained	1	5	5east	5e	16.8632	71.6301	142.415	1001.54	238.487	120.096	430.035	2327.63	12.4852	14.5388	167.858	357.736	42.4835	5.30881	-0.32907	-5.98638	1151.97	5263.52	490.065	10.9247	334.385	12.7476
7009500502	PSP	47.8707	-70.7141	C	96	4	0	798	E	Coniferous	Slope and in situ weathered	Thick	Well drained	1	5	5east	5e	16.8632	71.6301	142.415	1001.54	238.487	120.096	430.035	2327.63	12.4852	14.5388	167.858	357.736	42.4835	5.30881	-0.32907	-5.98638	1151.97	5263.52	490.065	10.9247	334.385	12.7476
7009500601	PSP	47.8831	-70.5999	B	76	17	7	729	D	Coniferous	Glacial without particular morphology	Thin to very thin	Moderately well drained	2	5	5east	5e	23.8916	82.3433	146.664	1046.44	243.84	127.906	416.113	2422.23	12.5122	14.9585	162.499	362.536	41.8397	5.40007	-0.0822075	-5.51191	1049	5187.86	440.395	10.894	306.419	12.7931
7009500602	PSP	47.8864	-70.6032	B	71	19	10	718	D	Coniferous	Glacial without particular morphology	Medium	Moderately well drained	2	5	5east	5e	25.3132	85.3106	149.016	1080.39	245.816	129.446	421.612	2424.14	12.6815	15.2798	161.518	366.822	41.0123	5.61465	0.164666	-5.32706	1044.22	5144.86	430.385	11.0614	307.725	13.0627
7009500701	PSP	47.8828	-70.784	B	76	15	9	710	D	Coniferous	Glacial without particular morphology	Thick	Moderately well drained	1	5	5east	5e	15.3513	76.1411	148.454	1070.73	241.182	125.704	460.09	2350.14	12.721	15.0565	166.048	365.839	39.647	5.63376	0.0947628	-5.5079	1133.66	5138.38	449.188	10.8879	339.825	12.8626
7009500701	PSP	47.8828	-70.784	C	68	23	9	710	D	Coniferous	Glacial without particular morphology	Thick	Moderately well drained	1	5	5east	5e	15.3513	76.1411	148.454	1070.73	241.182	125.704	460.09	2350.14	12.721	15.0565	166.048	365.839	39.647	5.63376	0.0947628	-5.5079	1133.66	5138.38	449.188	10.8879	339.825	12.8626
7009500702	PSP	47.8797	-70.7875	B	90	4	6	708	D	Coniferous	Glacial without particular morphology	Medium	Moderately well drained	1	5	5east	5e	15.3513	76.1411	148.454	1070.73	241.182	125.704	460.09	2350.14	12.721	15.0565	166.048	365.839	39.647	5.63376	0.0947628	-5.5079	1133.66	5138.38	449.188	10.8879	339.825	12.8626
7009500702	PSP	47.8797	-70.7875	C	80	14	6	708	D	Coniferous	Glacial without particular morphology	Medium	Moderately well drained	1	5	5east	5e	15.3513	76.1411	148.454	1070.73	241.182	125.704	460.09	2350.14	12.721	15.0565	166.048	365.839	39.647	5.63376	0.0947628	-5.5079	1133.66	5138.38	449.188	10.8879	339.825	12.8626
7009500901	PSP	47.9334	-70.4502	B	64	26	10	618	F	Coniferous	Glacial without particular morphology	Medium	Well drained	2	5	5east	5e	28.4982	91.2162	150.878	1103.69	248.814	133.291	411.737	2477.81	12.7136	15.411	158.592	369.671	40.8478	5.62505	0.321883	-4.88501	989.472	5103.11	404.859	10.8303	288.863	12.8936
7009500902	PSP	47.9311	-70.4462	B	82	12	6	720	C	Coniferous	Glacial without particular morphology	Medium	Moderately well drained	2	5	5east	5e	28.4982	91.2162	150.878	1103.69	248.814	133.291	411.737	2477.81	12.7136	15.411	158.592	369.671	40.8478	5.62505	0.321883	-4.88501	989.472	5103.11	404.859	10.8303	288.863	12.8936
7009500902	PSP	47.9311	-70.4462	C	83	13	4	720	C	Coniferous	Glacial without particular morphology	Medium	Moderately well drained	2	5	5east	5e	28.4982	91.2162	150.878	1103.69	248.814	133.291	411.737	2477.81	12.7136	15.411	158.592	369.671	40.8478	5.62505	0.321883	-4.88501	989.472	5103.11	404.859	10.8303	288.863	12.8936
7009501002	PSP	47.9656	-70.7889	B	78	12	10	800	D	Coniferous	Glacial without particular morphology	Thin	Moderately well drained	2	5	5east	5e	10.8104	56.2627	137.972	953.59	230.207	110.724	423.608	2111.02	12.3718	14.2655	174.942	352.959	40.1899	5.15193	-0.575925	-6.28348	1157.05	5189.08	465.389	10.8922	351.749	12.7805
7009600101	PSP	48.1504	-71.1655	B	68	25	7	420	A	Mixed	Glacial without particular morphology	Medium	Moderately well drained	1	5	5west	5d	22.4988	90.5528	160.594	1299.34	249.027	140.859	481.204	2524.58	13.5037	16.5044	159.474	397.241	33.8461	7.33626	1.44274	-4.44341	1016.08	4947.45	343.189	12.4632	320.941	14.9628
7009600101	PSP	48.1504	-71.1655	C	69	22	9	420	A	Mixed	Glacial without particular morphology	Medium	Moderately well drained	1	5	5west	5d	22.4988	90.5528	160.594	1299.34	249.027	140.859	481.204	2524.58	13.5037	16.5044	159.474	397.241	33.8461	7.33626	1.44274	-4.44341	1016.08	4947.45	343.189	12.4632	320.941	14.9628
7009600102	PSP	48.149	-71.1601	B	81	14	5	400	C	Mixed	Glacial without particular morphology	Medium	Somewhat poorly drained	4	5	5west	5d	22.4988	90.5528	160.594	1299.34	249.027	140.859	481.204	2524.58	13.5037	16.5044	159.474	397.241	33.8461	7.33626	1.44274	-4.44341	1016.08	4947.45	343.189	12.4632	320.941	14.9628
7009600102	PSP	48.149	-71.1601	C	80	14	6	400	C	Mixed	Glacial without particular morphology	Medium	Somewhat poorly drained	4	5	5west	5d	22.4988	90.5528	160.594	1299.34	249.027	140.859	481.204	2524.58	13.5037	16.5044	159.474	397.241	33.8461	7.33626	1.44274	-4.44341	1016.08	4947.45	343.189	12.4632	320.941	14.9628
7009700101	PSP	47.5337	-70.9165	B	52	35	13	812	C	Coniferous	Glacial without particular morphology	Thin	Moderately well drained	2	5	5east	5e	10.9499	56.7094	137.935	927.756	231.457	112.304	456.085	2277.18	12.1577	13.7171	175.75	352.29	44.1083	5.42254	-0.340294	-6.08243	1353.65	5423.11	598.685	10.5143	374.767	12.0913
7009700101	PSP	47.5337	-70.9165	C	70	24	6	812	C	Coniferous	Glacial without particular morphology	Thin	Moderately well drained	2	5	5east	5e	10.9499	56.7094	137.935	927.756	231.457	112.304	456.085	2277.18	12.1577	13.7171	175.75	352.29	44.1083	5.42254	-0.340294	-6.08243	1353.65	5423.11	598.685	10.5143	374.767	12.0913
7009700102	PSP	47.5346	-70.9222	B	68	20	12	828	C	Coniferous	Glacial without particular morphology	Medium	Moderately well drained	1	5	5east	5e	11.2325	58.815	138.882	941.688	232.115	114.078	459.218	2299.5	12.2032	13.857	174.301	353.975	43.8166	5.51946	-0.255897	-5.99663	1345.57	5405.09	590.251	10.5374	372.201	12.1406
7009700201	PSP	47.6503	-70.7843	B	82	11	7	714	D	Coniferous	Juxtaglacial	Thick	Moderately well drained	1	5	5east	5e	14.4675	70.8514	143.577	989.61	238.23	120.628	453.824	2354.46	12.3553	14.2424	168.376	358.198	42.7886	5.4969	-0.063719	-5.62207	1235.68	5296.64	530.176	10.4863	349.629	12.1051
7009700201	PSP	47.6503	-70.7843	C	74	18	8	714	D	Coniferous	Juxtaglacial	Thick	Moderately well drained	1	5	5east	5e	14.4675	70.8514	143.577	989.61	238.23	120.628	453.824	2354.46	12.3553	14.2424	168.376	358.198	42.7886	5.4969	-0.063719	-5.62207	1235.68	5296.64	530.176	10.4863	349.629	12.1051
7009700202	PSP	47.6543	-70.7842	B	89	5	6	724	D	Coniferous	Juxtaglacial	Thick	Moderately well drained	1	5	5east	5e	14.4115	73.6396	145.169	1006.97	239.575	122.093	458.108	2373.34	12.4149	14.3626	166.934	360.16	42.495	5.60579	0.0593304	-5.48244	1235.74	5276.99	525.448	10.4929	349.132	12.1594
7009700202	PSP	47.6543	-70.7842	C	48	46	6	724	D	Coniferous	Juxtaglacial	Thick	Moderately well drained	1	5	5east	5e	14.4115	73.6396	145.169	1006.97	239.575	122.093	458.108	2373.34	12.4149	14.3626	166.934	360.16	42.495	5.60579	0.0593304	-5.48244	1235.74	5276.99	525.448	10.4929	349.132	12.1594
7009700301	PSP	47.666	-70.6833	B	74	18	8	780	F	Coniferous	Glacial without particular morphology	Medium	Well drained	2	5	5east	5e	18.6112	82.3995	148.918	1042.61	243.943	129.05	451.21	2444.32	12.4143	14.6394	162.539	363.885	41.5671	5.65909	0.269556	-5.09837	1134.33	5197.32	472.423	10.4032	329	12.1188
7009700301	PSP	47.666	-70.6833	C	88	6	6	780	F	Coniferous	Glacial without particular morphology	Medium	Well drained	2	5	5east	5e	18.6112	82.3995	148.918	1042.61	243.943	129.05	451.21	2444.32	12.4143	14.6394	162.539	363.885	41.5671	5.65909	0.269556	-5.09837	1134.33	5197.32	472.423	10.4032	329	12.1188
7009700302	PSP	47.6647	-70.6779	B	78	14	8	824	D	Coniferous	Glacial without particular morphology	Medium	Moderately well drained	1	5	5east	5e	18.6112	82.3995	148.918	1042.61	243.943	129.05	451.21	2444.32	12.4143	14.6394	162.539	363.885	41.5671	5.65909	0.269556	-5.09837	1134.33	5197.32	472.423	10.4032	329	12.1188
7009700302	PSP	47.6647	-70.6779	C	80	13	7	824	D	Coniferous	Glacial without particular morphology	Medium	Moderately well drained	1	5	5east	5e	18.6112	82.3995	148.918	1042.61	243.943	129.05	451.21	2444.32	12.4143	14.6394	162.539	363.885	41.5671	5.65909	0.269556	-5.09837	1134.33	5197.32	472.423	10.4032	329	12.1188
7009800101	PSP	47.3004	-71.4323	B	58	32	10	849	D	Coniferous	Glacial without particular morphology	Thin to very thin	Moderately well drained	0	5	5east	5e	8.72939	51.5883	136.863	949.002	228.289	106.559	459.061	2193.98	12.3901	13.8194	177.704	356.9	43.0781	5.98437	-0.108725	-6.19277	1434.67	5478.48	619.066	11.0082	394.639	12.7485
7009800101	PSP	47.3004	-71.4323	C	63	29	8	849	D	Coniferous	Glacial without particular morphology	Thin to very thin	Moderately well drained	0	5	5east	5e	8.72939	51.5883	136.863	949.002	228.289	106.559	459.061	2193.98	12.3901	13.8194	177.704	356.9	43.0781	5.98437	-0.108725	-6.19277	1434.67	5478.48	619.066	11.0082	394.639	12.7485
7009800102	PSP	47.3015	-71.4268	B	82	8	10	826	F	Coniferous	Glacial without particular morphology	Thin to very thin	Moderately well drained	1	5	5east	5e	8.69191	51.2621	136.431	940.78	228.061	107.598	459.948	2215.99	12.3157	13.7642	177.801	355.643	43.1527	5.90057	-0.181663	-6.23506	1428.83	5477.46	616.563	10.941	393.102	12.6874
7009800201	PSP	47.3502	-71.3822	B	54	35	11	734	E	Coniferous	Glacial without particular morphology	Medium	Moderately well drained	2	5	5east	5e	9.37033	56.1339	144.655	1035.77	230.746	122.556	521.353	2425.53	12.4997	14.4691	175.613	366.831	41.7812	6.3886	0.41069	-5.57063	1431.52	5358.08	598.919	11.1054	393.722	13.0921
7009800201	PSP	47.3502	-71.3822	C	61	29	10	734	E	Coniferous	Glacial without particular morphology	Medium	Moderately well drained	2	5	5east	5e	9.37033	56.1339	144.655	1035.77	230.746	122.556	521.353	2425.53	12.4997	14.4691	175.613	366.831	41.7812	6.3886	0.41069	-5.57063	1431.52	5358.08	598.919	11.1054	393.722	13.0921
7009800202	PSP	47.3462	-71.3822	B	54	36	10	691	E	Coniferous	Glacial without particular morphology	Medium	Moderately well drained	2	5	5east	5e	9.37033	56.1339	144.655	1035.77	230.746	122.556	521.353	2425.53	12.4997	14.4691	175.613	366.831	41.7812	6.3886	0.41069	-5.57063	1431.52	5358.08	598.919	11.1054	393.722	13.0921
7009800202	PSP	47.3462	-71.3822	C	76	20	4	691	E	Coniferous	Glacial without particular morphology	Medium	Moderately well drained	2	5	5east	5e	9.37033	56.1339	144.655	1035.77	230.746	122.556	521.353	2425.53	12.4997	14.4691	175.613	366.831	41.7812	6.3886	0.41069	-5.57063	1431.52	5358.08	598.919	11.1054	393.722	13.0921
7009800301	PSP	47.3998	-71.3499	B	74	12	14	787	C	Coniferous	Glacial without particular morphology	Thick	Somewhat poorly drained	5	5	5east	5e	9.90526	58.326	142.858	999.335	232.32	114.315	479.892	2264.95	12.5217	14.2169	174.997	361.497	42.0067	6.02381	0.118436	-5.77849	1388.69	5354.95	583.913	10.8942	387.111	12.745
7009800301	PSP	47.3998	-71.3499	C	85	12	3	787	C	Coniferous	Glacial without particular morphology	Thick	Somewhat poorly drained	5	5	5east	5e	9.90526	58.326	142.858	999.335	232.32	114.315	479.892	2264.95	12.5217	14.2169	174.997	361.497	42.0067	6.02381	0.118436	-5.77849	1388.69	5354.95	583.913	10.8942	387.111	12.745
7009800302	PSP	47.3965	-71.3466	B	62	26	12	770	C	Coniferous	Glacial without particular morphology	Medium	Somewhat poorly drained	1	5	5east	5e	9.90526	58.326	142.858	999.335	232.32	114.315	479.892	2264.95	12.5217	14.2169	174.997	361.497	42.0067	6.02381	0.118436	-5.77849	1388.69	5354.95	583.913	10.8942	387.111	12.745
7009800302	PSP	47.3965	-71.3466	C	78	12	10	770	C	Coniferous	Glacial without particular morphology	Medium	Somewhat poorly drained	1	5	5east	5e	9.90526	58.326	142.858	999.335	232.32	114.315	479.892	2264.95	12.5217	14.2169	174.997	361.497	42.0067	6.02381	0.118436	-5.77849	1388.69	5354.95	583.913	10.8942	387.111	12.745
7009800401	PSP	47.4163	-71.2488	B	82	12	6	793	C	Coniferous	Glacial without particular morphology	Medium	Somewhat poorly drained	4	5	5east	5e	9.66401	55.5483	139.274	954.152	230.875	110.106	462.471	2211.15	12.345	13.8622	176.325	355.946	42.7953	5.74047	-0.170524	-6.06007	1382.35	5397.62	592.461	10.7538	386.31	12.5187
7009800401	PSP	47.4163	-71.2488	C	78	12	10	793	C	Coniferous	Glacial without particular morphology	Medium	Somewhat poorly drained	4	5	5east	5e	9.66401	55.5483	139.274	954.152	230.875	110.106	462.471	2211.15	12.345	13.8622	176.325	355.946	42.7953	5.74047	-0.170524	-6.06007	1382.35	5397.62	592.461	10.7538	386.31	12.5187
7009800501	PSP	47.4156	-71.2827	B	62	24	14	818	E	Coniferous	Glacial without particular morphology	Medium	Somewhat poorly drained	5	5	5east	5e	9.68517	55.9039	139.334	956.268	230.943	110.389	463.354	2208.91	12.3577	13.9312	176.039	356.086	42.6388	5.74044	-0.173088	-6.06878	1378.89	5392.06	588.77	10.7454	386.316	12.5034
7009800502	PSP	47.4143	-71.2882	B	72	16	12	809	D	Coniferous	Glacial without particular morphology	Medium	Somewhat poorly drained	2	5	5east	5e	9.8023	57.3381	141.154	974.565	231.579	112.966	474.829	2250.77	12.4092	14.0715	175.244	358.337	42.3714	5.8632	-0.0304923	-5.91557	1384.29	5369.69	587.615	10.7872	386.904	12.5807
7009800601	PSP	47.4168	-71.534	B	56	31	13	700	B	Coniferous	Glacial without particular morphology	Medium	Poorly drained	7	5	5east	5e	9.69585	63.6984	148.648	1071.91	235.354	121.533	515.538	2348.53	12.7505	14.7369	172.655	370.331	40.107	6.44369	0.566212	-5.32624	1387.14	5274.25	556.83	11.0681	391.231	13.1044
7009800602	PSP	47.4196	-71.53	B	72	13	15	758	B	Coniferous	Glacial without particular morphology	Medium	Somewhat poorly drained	1	5	5east	5e	9.24267	56.1047	140.464	979.911	230.929	111.686	473.633	2220.03	12.4936	14.1409	175.826	359.057	41.7305	5.91793	-0.0429829	-6.00033	1376.63	5370.33	575.025	10.8892	389.092	12.7084
7009800602	PSP	47.4196	-71.53	C	80	11	9	758	B	Coniferous	Glacial without particular morphology	Medium	Somewhat poorly drained	1	5	5east	5e	9.24267	56.1047	140.464	979.911	230.929	111.686	473.633	2220.03	12.4936	14.1409	175.826	359.057	41.7305	5.91793	-0.0429829	-6.00033	1376.63	5370.33	575.025	10.8892	389.092	12.7084
7009800701	PSP	47.4496	-71.4829	B	69	20	11	753	D	Coniferous	Glacial without particular morphology	Medium	Moderately well drained	1	5	5east	5e	10.1385	65.4266	149.155	1080.7	236.571	122.63	516.505	2354.86	12.8048	14.8399	172.143	370.81	39.9461	6.42987	0.589478	-5.23386	1374.37	5253.08	549.439	11.0169	388.869	13.0618
7009800701	PSP	47.4496	-71.4829	C	72	26	2	753	D	Coniferous	Glacial without particular morphology	Medium	Moderately well drained	1	5	5east	5e	10.1385	65.4266	149.155	1080.7	236.571	122.63	516.505	2354.86	12.8048	14.8399	172.143	370.81	39.9461	6.42987	0.589478	-5.23386	1374.37	5253.08	549.439	11.0169	388.869	13.0618
7009800701	PSP	47.4496	-71.4829	C	74	20	6	753	D	Coniferous	Glacial without particular morphology	Medium	Moderately well drained	1	5	5east	5e	10.1385	65.4266	149.155	1080.7	236.571	122.63	516.505	2354.86	12.8048	14.8399	172.143	370.81	39.9461	6.42987	0.589478	-5.23386	1374.37	5253.08	549.439	11.0169	388.869	13.0618
7009800702	PSP	47.452	-71.4875	B	68	18	14	713	D	Coniferous	Glacial without particular morphology	Thin	Moderately well drained	2	5	5east	5e	10.0941	65.0959	148.961	1076.84	236.393	121.627	512.82	2347.19	12.8014	14.7827	172.299	370.774	40.0086	6.43337	0.565552	-5.24285	1374.56	5261.25	550.907	11.0487	389.468	13.108
7009800702	PSP	47.452	-71.4875	C	57	33	10	713	D	Coniferous	Glacial without particular morphology	Thin	Moderately well drained	2	5	5east	5e	10.0941	65.0959	148.961	1076.84	236.393	121.627	512.82	2347.19	12.8014	14.7827	172.299	370.774	40.0086	6.43337	0.565552	-5.24285	1374.56	5261.25	550.907	11.0487	389.468	13.108
7009800801	PSP	47.5001	-71.2161	B	68	22	10	801	C	Coniferous	Juxtaglacial	Thick	Moderately well drained	1	5	5east	5e	10.6585	63.9431	144.573	1004.34	236.414	118.118	492.26	2297.1	12.4581	14.2754	173.472	360.937	41.1917	5.85546	0.0607504	-5.72933	1349.18	5294.5	556.558	10.7136	384.716	12.5161
7009800801	PSP	47.5001	-71.2161	C	72	21	7	801	C	Coniferous	Juxtaglacial	Thick	Moderately well drained	1	5	5east	5e	10.6585	63.9431	144.573	1004.34	236.414	118.118	492.26	2297.1	12.4581	14.2754	173.472	360.937	41.1917	5.85546	0.0607504	-5.72933	1349.18	5294.5	556.558	10.7136	384.716	12.5161
7009800802	PSP	47.4961	-71.2161	B	80	10	10	790	D	Coniferous	Proglacial	Thick	Well drained	1	5	5east	5e	10.6585	63.9431	144.573	1004.34	236.414	118.118	492.26	2297.1	12.4581	14.2754	173.472	360.937	41.1917	5.85546	0.0607504	-5.72933	1349.18	5294.5	556.558	10.7136	384.716	12.5161
7009800901	PSP	47.5666	-71.399	B	82	10	8	822	F	Coniferous	Glacial without particular morphology	Thin to very thin	Moderately well drained	0	5	5east	5e	10.063	59.9263	142.734	993.741	233.251	115.302	481.555	2259.24	12.465	14.2244	174.322	360.012	41.3685	5.8359	-0.0426073	-5.94843	1346.99	5320.08	558.041	10.8662	384.883	12.6815
7009800901	PSP	47.5666	-71.399	C	70	25	5	822	F	Coniferous	Glacial without particular morphology	Thin to very thin	Moderately well drained	0	5	5east	5e	10.063	59.9263	142.734	993.741	233.251	115.302	481.555	2259.24	12.465	14.2244	174.322	360.012	41.3685	5.8359	-0.0426073	-5.94843	1346.99	5320.08	558.041	10.8662	384.883	12.6815
7009800902	PSP	47.5655	-71.4044	B	72	17	11	838	C	Coniferous	Glacial without particular morphology	Medium	Moderately well drained	2	5	5east	5e	9.58025	54.7673	136.836	925.866	230.67	108.432	453.558	2161.35	12.2174	13.7657	176.906	351.829	42.6014	5.40794	-0.505754	-6.42689	1342.62	5389.38	572.564	10.6719	383.846	12.3162
7009800902	PSP	47.5655	-71.4044	C	80	14	6	838	C	Coniferous	Glacial without particular morphology	Medium	Moderately well drained	2	5	5east	5e	9.58025	54.7673	136.836	925.866	230.67	108.432	453.558	2161.35	12.2174	13.7657	176.906	351.829	42.6014	5.40794	-0.505754	-6.42689	1342.62	5389.38	572.564	10.6719	383.846	12.3162
7009801001	PSP	47.6513	-71.2002	B	76	10	14	816	D	Coniferous	Glacial without particular morphology	Medium	Moderately well drained	1	5	5east	5e	10.2474	57.05	138.295	936.623	232.085	110.795	460.334	2194.27	12.2263	13.8054	176.035	352.883	42.3903	5.42979	-0.435877	-6.31141	1332.08	5354.35	565.505	10.672	381.698	12.3189
7009801001	PSP	47.6513	-71.2002	C	76	12	12	816	D	Coniferous	Glacial without particular morphology	Medium	Moderately well drained	1	5	5east	5e	10.2474	57.05	138.295	936.623	232.085	110.795	460.334	2194.27	12.2263	13.8054	176.035	352.883	42.3903	5.42979	-0.435877	-6.31141	1332.08	5354.35	565.505	10.672	381.698	12.3189
7009801002	PSP	47.6527	-71.1948	B	92	5	3	859	C	Coniferous	Glacial without particular morphology	Medium	Somewhat poorly drained	1	5	5east	5e	10.2474	57.05	138.295	936.623	232.085	110.795	460.334	2194.27	12.2263	13.8054	176.035	352.883	42.3903	5.42979	-0.435877	-6.31141	1332.08	5354.35	565.505	10.672	381.698	12.3189
7009801002	PSP	47.6527	-71.1948	C	88	8	4	859	C	Coniferous	Glacial without particular morphology	Medium	Somewhat poorly drained	1	5	5east	5e	10.2474	57.05	138.295	936.623	232.085	110.795	460.334	2194.27	12.2263	13.8054	176.035	352.883	42.3903	5.42979	-0.435877	-6.31141	1332.08	5354.35	565.505	10.672	381.698	12.3189
7009801101	PSP	47.6665	-71.3834	B	90	4	6	810	B	Coniferous	Proglacial	Thick	Moderately well drained	1	5	5east	5e	9.84573	56.4901	139.493	959.722	231.286	111.016	458.45	2179.35	12.3777	14.0676	175.79	355.525	41.6851	5.6086	-0.296533	-6.14111	1315.82	5321.78	548.992	10.7556	379.969	12.57
7009801101	PSP	47.6665	-71.3834	C	82	12	6	810	B	Coniferous	Proglacial	Thick	Moderately well drained	1	5	5east	5e	9.84573	56.4901	139.493	959.722	231.286	111.016	458.45	2179.35	12.3777	14.0676	175.79	355.525	41.6851	5.6086	-0.296533	-6.14111	1315.82	5321.78	548.992	10.7556	379.969	12.57
7009801202	PSP	47.6671	-71.3991	B	78	16	6	887	D	Coniferous	Glacial without particular morphology	Medium	Somewhat poorly drained	5	5	5east	5e	9.2326	51.73	135.578	904.825	228.973	106.289	440.048	2118.06	12.1019	13.6107	178.245	349.362	42.6702	5.22387	-0.646036	-6.58067	1316.21	5372.03	562.785	10.5822	380.899	12.1851
7009801202	PSP	47.6671	-71.3991	C	76	19	5	887	D	Coniferous	Glacial without particular morphology	Medium	Somewhat poorly drained	5	5	5east	5e	9.2326	51.73	135.578	904.825	228.973	106.289	440.048	2118.06	12.1019	13.6107	178.245	349.362	42.6702	5.22387	-0.646036	-6.58067	1316.21	5372.03	562.785	10.5822	380.899	12.1851
7009900101	PSP	47.7503	-71.2999	B	56	27	17	885	D	Coniferous	Glacial without particular morphology	Medium	Moderately well drained	2	5	5east	5e	9.23976	51.6967	135.545	917.855	228.826	106.57	442.544	2114.11	12.205	13.7999	178.124	350.176	42.2391	5.30818	-0.611675	-6.50869	1308.87	5350.83	553.124	10.71	380.738	12.4112
7009900101	PSP	47.7503	-71.2999	C	70	22	8	885	D	Coniferous	Glacial without particular morphology	Medium	Moderately well drained	2	5	5east	5e	9.23976	51.6967	135.545	917.855	228.826	106.57	442.544	2114.11	12.205	13.7999	178.124	350.176	42.2391	5.30818	-0.611675	-6.50869	1308.87	5350.83	553.124	10.71	380.738	12.4112
7009900102	PSP	47.7463	-71.2993	B	80	10	10	876	D	Coniferous	Glacial without particular morphology	Medium	Moderately well drained	2	5	5east	5e	9.23976	51.6967	135.545	917.855	228.826	106.57	442.544	2114.11	12.205	13.7999	178.124	350.176	42.2391	5.30818	-0.611675	-6.50869	1308.87	5350.83	553.124	10.71	380.738	12.4112
7009900102	PSP	47.7463	-71.2993	C	80	16	4	876	D	Coniferous	Glacial without particular morphology	Medium	Moderately well drained	2	5	5east	5e	9.23976	51.6967	135.545	917.855	228.826	106.57	442.544	2114.11	12.205	13.7999	178.124	350.176	42.2391	5.30818	-0.611675	-6.50869	1308.87	5350.83	553.124	10.71	380.738	12.4112
7009900201	PSP	47.7837	-71.3664	B	72	20	8	811	D	Coniferous	Glacial without particular morphology	Thin	Moderately well drained	2	5	5east	5e	9.2286	55.4047	140.293	958.119	230.608	110.461	456.893	2137.81	12.3558	14.0878	176.208	354.965	41.0837	5.40408	-0.347136	-6.11028	1295.02	5265.25	532.147	10.5688	380.622	12.3392
7009900201	PSP	47.7837	-71.3664	C	82	11	7	811	D	Coniferous	Glacial without particular morphology	Thin	Moderately well drained	2	5	5east	5e	9.2286	55.4047	140.293	958.119	230.608	110.461	456.893	2137.81	12.3558	14.0878	176.208	354.965	41.0837	5.40408	-0.347136	-6.11028	1295.02	5265.25	532.147	10.5688	380.622	12.3392
7009900202	PSP	47.7823	-71.3612	B	65	25	10	836	D	Coniferous	Glacial without particular morphology	Medium	Moderately well drained	2	5	5east	5e	9.2286	55.4047	140.293	958.119	230.608	110.461	456.893	2137.81	12.3558	14.0878	176.208	354.965	41.0837	5.40408	-0.347136	-6.11028	1295.02	5265.25	532.147	10.5688	380.622	12.3392
7009900202	PSP	47.7823	-71.3612	C	65	26	9	836	D	Coniferous	Glacial without particular morphology	Medium	Moderately well drained	2	5	5east	5e	9.2286	55.4047	140.293	958.119	230.608	110.461	456.893	2137.81	12.3558	14.0878	176.208	354.965	41.0837	5.40408	-0.347136	-6.11028	1295.02	5265.25	532.147	10.5688	380.622	12.3392
7009900301	PSP	47.8004	-71.7334	B	78	13	9	652	E	Coniferous	Glacial without particular morphology	Medium	Well drained	2	5	5east	5e	16.7113	91.4097	167.218	1274.64	250.145	146.729	567.696	2544.15	13.0575	16.3736	159.743	393.925	35.108	6.60207	1.47836	-3.75952	1188.69	4877.49	416.355	10.4569	362.22	12.7363
7009900301	PSP	47.8004	-71.7334	C	65	26	9	652	E	Coniferous	Glacial without particular morphology	Medium	Well drained	2	5	5east	5e	16.7113	91.4097	167.218	1274.64	250.145	146.729	567.696	2544.15	13.0575	16.3736	159.743	393.925	35.108	6.60207	1.47836	-3.75952	1188.69	4877.49	416.355	10.4569	362.22	12.7363
7009900302	PSP	47.7966	-71.7343	B	68	23	9	597	E	Mixed	Glacial without particular morphology	Medium	Well drained	2	5	5east	5e	13.2099	79.5429	159.408	1176.41	243.55	137.65	554.029	2460.81	12.7959	15.7247	165.011	382.362	36.6324	6.31011	0.968712	-4.35923	1240.97	5003.64	454.215	10.452	374.111	12.6502
7009900401	PSP	47.9339	-71.1494	B	75	14	11	797	A	Coniferous	Glacial without particular morphology	Thick	Somewhat poorly drained	2	5	5east	5e	8.72241	47.3546	135.882	921.975	226.756	110.84	455.411	2157.65	12.091	13.9595	180.392	350.894	41.3324	5.2113	-0.636881	-6.38748	1271.42	5291.49	525.372	10.6578	377.591	12.4849
7009900401	PSP	47.9339	-71.1494	C	74	15	11	797	A	Coniferous	Glacial without particular morphology	Thick	Somewhat poorly drained	2	5	5east	5e	8.72241	47.3546	135.882	921.975	226.756	110.84	455.411	2157.65	12.091	13.9595	180.392	350.894	41.3324	5.2113	-0.636881	-6.38748	1271.42	5291.49	525.372	10.6578	377.591	12.4849
7009900402	PSP	47.9368	-71.1513	B	60	30	10	800	B	Coniferous	Glacial without particular morphology	Thick	Moderately well drained	2	5	5east	5e	8.96274	49.8682	138.155	952.068	227.929	113.646	465.35	2187.9	12.1898	14.1776	179.057	354.553	40.5353	5.37575	-0.45421	-6.16069	1261.64	5257.15	511.06	10.7112	376.733	12.6024
7009900402	PSP	47.9368	-71.1513	C	65	31	4	800	B	Coniferous	Glacial without particular morphology	Thick	Moderately well drained	2	5	5east	5e	8.96274	49.8682	138.155	952.068	227.929	113.646	465.35	2187.9	12.1898	14.1776	179.057	354.553	40.5353	5.37575	-0.45421	-6.16069	1261.64	5257.15	511.06	10.7112	376.733	12.6024
7009900501	PSP	47.9673	-71.498	B	81	10	9	783	C	Coniferous	Glacial without particular morphology	Thick	Somewhat poorly drained	1	5	5east	5e	9.98028	51.4089	141.537	999.385	228.407	117.625	480.46	2238.9	12.3724	14.4946	177.996	360.263	38.9802	5.68348	-0.157459	-6.13012	1240.06	5217.61	484.328	11.1828	377.855	13.0523
7009900501	PSP	47.9673	-71.498	C	64	25	11	783	C	Coniferous	Glacial without particular morphology	Thick	Somewhat poorly drained	1	5	5east	5e	9.98028	51.4089	141.537	999.385	228.407	117.625	480.46	2238.9	12.3724	14.4946	177.996	360.263	38.9802	5.68348	-0.157459	-6.13012	1240.06	5217.61	484.328	11.1828	377.855	13.0523
7009900502	PSP	47.9658	-71.4944	B	63	24	13	789	C	Coniferous	Glacial without particular morphology	Medium	Moderately well drained	2	5	5east	5e	9.56442	48.4234	138.18	970.634	226.891	113.565	466.06	2189.7	12.3082	14.3201	179.466	356.948	39.0622	5.62775	-0.329495	-6.29517	1233.56	5258.83	481.243	11.1823	377.449	13.0409
7009900502	PSP	47.9658	-71.4944	B	84	7	9	789	C	Coniferous	Glacial without particular morphology	Medium	Moderately well drained	2	5	5east	5e	9.56442	48.4234	138.18	970.634	226.891	113.565	466.06	2189.7	12.3082	14.3201	179.466	356.948	39.0622	5.62775	-0.329495	-6.29517	1233.56	5258.83	481.243	11.1823	377.449	13.0409
7009900502	PSP	47.9658	-71.4944	C	59	29	12	789	C	Coniferous	Glacial without particular morphology	Medium	Moderately well drained	2	5	5east	5e	9.56442	48.4234	138.18	970.634	226.891	113.565	466.06	2189.7	12.3082	14.3201	179.466	356.948	39.0622	5.62775	-0.329495	-6.29517	1233.56	5258.83	481.243	11.1823	377.449	13.0409
7009900502	PSP	47.9658	-71.4944	C	82	9	9	789	C	Coniferous	Glacial without particular morphology	Medium	Moderately well drained	2	5	5east	5e	9.56442	48.4234	138.18	970.634	226.891	113.565	466.06	2189.7	12.3082	14.3201	179.466	356.948	39.0622	5.62775	-0.329495	-6.29517	1233.56	5258.83	481.243	11.1823	377.449	13.0409
7009900601	PSP	48	-71.3507	B	54	32	14	730	C	Mixed	Glacial without particular morphology	Medium	Moderately well drained	2	5	5east	5e	10.318	58.7883	148.056	1048.71	232.572	124.88	510.879	2311.94	12.4237	14.8488	174.784	366.832	37.8084	5.7418	0.181408	-5.33049	1234.81	5112.37	466.106	10.6452	377.936	12.6684
7009900601	PSP	48	-71.3507	C	67	25	8	730	C	Mixed	Glacial without particular morphology	Medium	Moderately well drained	2	5	5east	5e	10.318	58.7883	148.056	1048.71	232.572	124.88	510.879	2311.94	12.4237	14.8488	174.784	366.832	37.8084	5.7418	0.181408	-5.33049	1234.81	5112.37	466.106	10.6452	377.936	12.6684
7009900602	PSP	48.004	-71.351	B	79	14	7	749	F	Coniferous	Glacial without particular morphology	Medium	Well drained	2	5	5east	5e	9.47123	52.1857	142.248	982.686	229.488	118.725	487.169	2245.72	12.2274	14.4146	178.305	358.196	39.3016	5.47027	-0.21451	-5.83269	1244.38	5191.87	489.18	10.5885	378.026	12.4758
7009900701	PSP	48.0333	-71.7161	B	75	12	13	391	B	Deciduous	Glacial without particular morphology	Thick	Somewhat poorly drained	5	5	5west	5c	21.8527	102.154	173.226	1375.87	255.85	153.108	564.679	2591.28	13.4	16.9404	154.697	406.369	33.6678	6.97593	1.97617	-3.06746	1131.52	4773.44	379.851	10.4084	348.077	12.8652
7009900701	PSP	48.0333	-71.7161	C	71	23	6	391	B	Deciduous	Glacial without particular morphology	Thick	Somewhat poorly drained	5	5	5west	5c	21.8527	102.154	173.226	1375.87	255.85	153.108	564.679	2591.28	13.4	16.9404	154.697	406.369	33.6678	6.97593	1.97617	-3.06746	1131.52	4773.44	379.851	10.4084	348.077	12.8652
7009900702	PSP	48.0346	-71.7104	B	72	18	10	415	B	Coniferous	Glacial without particular morphology	Thick	Moderately well drained	2	5	5west	5c	24.688	105.7	173.851	1390.38	257.781	154.26	551.031	2608.43	13.4701	17.0436	153.082	408.157	33.3775	7.07239	2.03492	-2.84977	1089.99	4756.44	360.911	10.4024	334.633	12.883
7009900702	PSP	48.0346	-71.7104	C	63	24	13	415	B	Coniferous	Glacial without particular morphology	Thick	Moderately well drained	2	5	5west	5c	24.688	105.7	173.851	1390.38	257.781	154.26	551.031	2608.43	13.4701	17.0436	153.082	408.157	33.3775	7.07239	2.03492	-2.84977	1089.99	4756.44	360.911	10.4024	334.633	12.883
7009901001	PSP	48.1669	-71.5665	B	62	28	10	398	D	Deciduous	Glacial without particular morphology	Medium	Moderately well drained	2	5	5west	5c	22.4562	98.8076	168.885	1315.71	253.568	150.599	533.636	2600.65	13.1811	16.6051	155.75	399.184	34.7686	6.75454	1.63107	-3.63443	1093.31	4830.46	379.079	10.7106	337.183	13.0197
7009901001	PSP	48.1669	-71.5665	C	66	26	8	398	D	Deciduous	Glacial without particular morphology	Medium	Moderately well drained	2	5	5west	5c	22.4562	98.8076	168.885	1315.71	253.568	150.599	533.636	2600.65	13.1811	16.6051	155.75	399.184	34.7686	6.75454	1.63107	-3.63443	1093.31	4830.46	379.079	10.7106	337.183	13.0197
7009901002	PSP	48.1701	-71.5692	B	86	8	6	373	A	Mixed	Proglacial	Thick	Well drained	1	5	5west	5c	26.9181	109.488	174.324	1391.85	258.738	155.641	532.902	2627.11	13.4247	16.9908	150.258	408.765	33.3407	7.08783	2.0731	-3.01463	1047.64	4742.81	349.051	10.6358	325.773	13.019
7009901002	PSP	48.1701	-71.5692	C	94	2	4	373	A	Mixed	Proglacial	Thick	Well drained	1	5	5west	5c	26.9181	109.488	174.324	1391.85	258.738	155.641	532.902	2627.11	13.4247	16.9908	150.258	408.765	33.3407	7.08783	2.0731	-3.01463	1047.64	4742.81	349.051	10.6358	325.773	13.019
7009901101	PSP	48.1664	-71.6498	B	81	14	5	369	E	Coniferous	Glacial without particular morphology	Thin	Well drained	1	5	5west	5c	26.8474	103.156	172.126	1373.48	256.377	152.92	536.111	2600.89	13.4231	16.9183	154.221	405.94	33.6808	6.99973	1.89107	-3.27766	1072.89	4773.55	360.329	10.7004	333.193	13.0839
7009901101	PSP	48.1664	-71.6498	C	63	25	12	369	E	Coniferous	Glacial without particular morphology	Thin	Well drained	1	5	5west	5c	26.8474	103.156	172.126	1373.48	256.377	152.92	536.111	2600.89	13.4231	16.9183	154.221	405.94	33.6808	6.99973	1.89107	-3.27766	1072.89	4773.55	360.329	10.7004	333.193	13.0839
7009901102	PSP	48.1677	-71.6445	B	67	24	9	431	C	Mixed	Glacial without particular morphology	Thick	Moderately well drained	2	5	5west	5c	26.1663	100.315	169.249	1344.93	254.785	149.755	526.98	2578.7	13.3956	16.7587	155.469	402.449	33.8205	6.9634	1.71763	-3.51129	1069.05	4814.7	360.214	10.7989	331.631	13.1873
7009901102	PSP	48.1677	-71.6445	C	75	22	3	431	C	Mixed	Glacial without particular morphology	Thick	Moderately well drained	2	5	5west	5c	26.1663	100.315	169.249	1344.93	254.785	149.755	526.98	2578.7	13.3956	16.7587	155.469	402.449	33.8205	6.9634	1.71763	-3.51129	1069.05	4814.7	360.214	10.7989	331.631	13.1873
7009901201	PSP	48.1998	-71.5814	B	67	19	14	358	B	Mixed	Glacial without particular morphology	Thick	Somewhat poorly drained	1	5	5west	5c	28.5953	113.291	174.854	1423.62	260.072	158.775	547.976	2676.73	13.5164	17.1769	147.784	412.246	32.3527	7.27374	2.16632	-2.8036	1046.52	4737.3	337.397	10.7596	324.481	13.2746
7009901201	PSP	48.1998	-71.5814	C	68	24	8	358	B	Mixed	Glacial without particular morphology	Thick	Somewhat poorly drained	1	5	5west	5c	28.5953	113.291	174.854	1423.62	260.072	158.775	547.976	2676.73	13.5164	17.1769	147.784	412.246	32.3527	7.27374	2.16632	-2.8036	1046.52	4737.3	337.397	10.7596	324.481	13.2746
7009901202	PSP	48.1971	-71.5778	B	68	24	8	342	B	Coniferous	Proglacial	Thick	Moderately well drained	2	5	5west	5c	28.5953	113.291	174.854	1423.62	260.072	158.775	547.976	2676.73	13.5164	17.1769	147.784	412.246	32.3527	7.27374	2.16632	-2.8036	1046.52	4737.3	337.397	10.7596	324.481	13.2746
7009901301	PSP	48.2834	-71.7317	B	58	26	16	389	D	Mixed	Glacial without particular morphology	Thin to very thin	Well drained	2	5	5west	5d	41.1604	101.304	169.022	1371.13	255.628	150.84	488.689	2597.84	13.5367	16.8992	155.329	404.758	32.8355	7.1384	1.73282	-3.58317	964.441	4800.56	315.441	11.1995	306.393	13.8075
7009901301	PSP	48.2834	-71.7317	C	84	10	6	389	D	Mixed	Glacial without particular morphology	Thin to very thin	Well drained	2	5	5west	5d	41.1604	101.304	169.022	1371.13	255.628	150.84	488.689	2597.84	13.5367	16.8992	155.329	404.758	32.8355	7.1384	1.73282	-3.58317	964.441	4800.56	315.441	11.1995	306.393	13.8075
7009901302	PSP	48.2872	-71.7316	B	77	16	7	390	B	Mixed	Glacial without particular morphology	Thin	Moderately well drained	2	5	5west	5d	40.302	99.5625	168.445	1360.03	254.717	150.348	491.036	2588.4	13.4722	16.7809	156.155	403.818	33.0206	7.13124	1.68731	-3.70652	973.622	4814.01	321.745	11.238	310.764	13.8009
7009901302	PSP	48.2872	-71.7316	C	74	18	8	390	B	Mixed	Glacial without particular morphology	Thin	Moderately well drained	2	5	5west	5d	40.302	99.5625	168.445	1360.03	254.717	150.348	491.036	2588.4	13.4722	16.7809	156.155	403.818	33.0206	7.13124	1.68731	-3.70652	973.622	4814.01	321.745	11.238	310.764	13.8009
7009901401	PSP	48.3164	-71.4161	B	58	33	9	207	D	Mixed	Glacial without particular morphology	Medium	Moderately well drained	2	5	5west	5d	35.9853	110.216	173.14	1494.7	257.262	151.381	486.978	2613.82	14.271	17.6214	148.05	421.587	31.0085	8.16971	2.40667	-3.36013	963.74	4764.89	298.166	12.6936	298.69	15.6519
7009901401	PSP	48.3164	-71.4161	B	69	24	7	207	D	Mixed	Glacial without particular morphology	Medium	Moderately well drained	2	5	5west	5d	35.9853	110.216	173.14	1494.7	257.262	151.381	486.978	2613.82	14.271	17.6214	148.05	421.587	31.0085	8.16971	2.40667	-3.36013	963.74	4764.89	298.166	12.6936	298.69	15.6519
7009901401	PSP	48.3164	-71.4161	C	78	15	7	207	D	Mixed	Glacial without particular morphology	Medium	Moderately well drained	2	5	5west	5d	35.9853	110.216	173.14	1494.7	257.262	151.381	486.978	2613.82	14.271	17.6214	148.05	421.587	31.0085	8.16971	2.40667	-3.36013	963.74	4764.89	298.166	12.6936	298.69	15.6519
7009901501	PSP	48.3336	-71.5995	B	59	30	11	362	D	Mixed	Glacial without particular morphology	Medium	Well drained	2	5	5west	5d	27.6499	89.1796	161.577	1306.47	248.511	141.998	488.027	2513.76	13.5081	16.4747	160.374	397.386	33.9471	7.13928	1.3369	-4.64586	1029.58	4904.62	348.733	12.1678	319.201	14.7137
7009901501	PSP	48.3336	-71.5995	C	85	11	4	362	D	Mixed	Glacial without particular morphology	Medium	Well drained	2	5	5west	5d	27.6499	89.1796	161.577	1306.47	248.511	141.998	488.027	2513.76	13.5081	16.4747	160.374	397.386	33.9471	7.13928	1.3369	-4.64586	1029.58	4904.62	348.733	12.1678	319.201	14.7137
7009901502	PSP	48.3373	-71.6001	B	70	23	7	378	E	Mixed	Glacial without particular morphology	Thin	Well drained	2	5	5west	5d	25.7469	83.1403	158.136	1291.44	244.234	137.559	490.806	2454.45	13.5533	16.4005	162.024	395.348	33.4423	7.16469	1.08264	-4.65373	1062.29	4926.69	353.918	12.2656	333.638	14.9662
7100300201	PSP	48.5997	-72.5841	B	80	8	12	283	A	Mixed	Glacial without particular morphology	Thick	Somewhat poorly drained	5	5	5west	5d	50.1575	92.8318	164.853	1408.42	250.401	145.638	413.03	2559.49	13.9927	17.2081	158.571	408.088	32.5283	7.55561	1.62789	-4.2992	837.578	4798.67	271.711	12.5759	273.832	15.3109
7100300301	PSP	48.7673	-72.9985	C	67	21	12	450	B	Coniferous	Glacial without particular morphology	Thick	Moderately well drained	2	5	5west	5c	35.5856	67.8308	150.089	1205.37	236.062	130.822	389.472	2346.09	13.306	15.9298	169.233	383.709	33.6741	6.76993	0.522625	-5.67809	852.958	4866.98	286.808	12.3422	279.353	14.8134
7100300502	PSP	48.8175	-73.1552	B	71	24	5	450	B	Coniferous	Glacial without particular morphology	Thick	Moderately well drained	2	5	5west	5c	35.2959	67.1609	149.428	1200.68	235.693	129.222	386.303	2317.16	13.3386	15.8709	169.533	383.008	34.0017	6.7477	0.44849	-5.83897	857.686	4872.93	291.42	12.449	279.828	14.9357
7100300502	PSP	48.8175	-73.1552	B	82	14	4	450	B	Coniferous	Glacial without particular morphology	Thick	Moderately well drained	2	5	5west	5c	35.2959	67.1609	149.428	1200.68	235.693	129.222	386.303	2317.16	13.3386	15.8709	169.533	383.008	34.0017	6.7477	0.44849	-5.83897	857.686	4872.93	291.42	12.449	279.828	14.9357
7100300502	PSP	48.8175	-73.1552	C	71	18	11	450	B	Coniferous	Glacial without particular morphology	Thick	Moderately well drained	2	5	5west	5c	35.2959	67.1609	149.428	1200.68	235.693	129.222	386.303	2317.16	13.3386	15.8709	169.533	383.008	34.0017	6.7477	0.44849	-5.83897	857.686	4872.93	291.42	12.449	279.828	14.9357
7100300502	PSP	48.8175	-73.1552	C	72	24	4	450	B	Coniferous	Glacial without particular morphology	Thick	Moderately well drained	2	5	5west	5c	35.2959	67.1609	149.428	1200.68	235.693	129.222	386.303	2317.16	13.3386	15.8709	169.533	383.008	34.0017	6.7477	0.44849	-5.83897	857.686	4872.93	291.42	12.449	279.828	14.9357
7100300601	PSP	48.8842	-73.5825	B	62	32	6	618	B	Coniferous	Glacial without particular morphology	Thick	Somewhat poorly drained	5	5	5west	5c	32.6943	58.3806	140.261	1083.13	233.187	112.583	337.848	2081.76	13.2269	15.0071	175.805	367.765	35.8757	6.29007	-0.244144	-6.99879	858.462	4978.96	307.996	12.7788	278.46	14.9909
7100300601	PSP	48.8842	-73.5825	C	76	16	8	618	B	Coniferous	Glacial without particular morphology	Thick	Somewhat poorly drained	5	5	5west	5c	32.6943	58.3806	140.261	1083.13	233.187	112.583	337.848	2081.76	13.2269	15.0071	175.805	367.765	35.8757	6.29007	-0.244144	-6.99879	858.462	4978.96	307.996	12.7788	278.46	14.9909
7100300602	PSP	48.8803	-73.5829	B	36	50	14	630	C	Coniferous	Glacial without particular morphology	Medium	Moderately well drained	2	5	5west	5c	32.8584	58.1509	138.21	1070.25	233.171	109.962	329.375	2040.7	13.226	14.9422	176.018	366.064	36.1905	6.24704	-0.38062	-7.02265	852.089	4996.52	308.41	12.8114	276.733	15.0534
7100300602	PSP	48.8803	-73.5829	B	76	10	14	630	C	Coniferous	Glacial without particular morphology	Medium	Moderately well drained	2	5	5west	5c	32.8584	58.1509	138.21	1070.25	233.171	109.962	329.375	2040.7	13.226	14.9422	176.018	366.064	36.1905	6.24704	-0.38062	-7.02265	852.089	4996.52	308.41	12.8114	276.733	15.0534
7100300602	PSP	48.8803	-73.5829	C	78	17	5	630	C	Coniferous	Glacial without particular morphology	Medium	Moderately well drained	2	5	5west	5c	32.8584	58.1509	138.21	1070.25	233.171	109.962	329.375	2040.7	13.226	14.9422	176.018	366.064	36.1905	6.24704	-0.38062	-7.02265	852.089	4996.52	308.41	12.8114	276.733	15.0534
7100300701	PSP	49.2167	-73.432	B	72	17	11	434	C	Coniferous	Glacial without particular morphology	Thick	Somewhat poorly drained	1	6	6west	6e	32.0369	77.8456	149.023	1213.28	244.339	124.151	384.916	2227.24	13.6584	15.7778	167.489	382.417	34.3306	6.90707	0.29665	-6.30955	885.222	4878.65	303.505	13.5645	287.434	16.1854
7100300702	PSP	49.2198	-73.4356	B	78	16	6	427	A	Coniferous	Glacial without particular morphology	Thick	Poorly drained	1	6	6west	6e	32.3122	80.5532	150.248	1235.32	246.122	125.72	392.86	2242.78	13.7509	15.9027	166.579	384.565	34.0475	6.99734	0.410982	-6.21938	890.473	4865.82	303.158	13.6423	290.284	16.2891
7100400101	PSP	49.4171	-72.7461	B	78	14	8	451	C	Coniferous	Glacial without particular morphology	Thin	Moderately well drained	1	5	5west	5d	31.0206	64.8715	147.075	1176.14	235.046	125.214	386.453	2246.57	13.3793	15.6983	171.175	378.169	36.2985	6.38429	-0.0279895	-6.41973	907.243	4869.34	329.238	12.6884	284.117	15.2862
7100400101	PSP	49.4171	-72.7461	C	82	12	6	451	C	Coniferous	Glacial without particular morphology	Thin	Moderately well drained	1	5	5west	5d	31.0206	64.8715	147.075	1176.14	235.046	125.214	386.453	2246.57	13.3793	15.6983	171.175	378.169	36.2985	6.38429	-0.0279895	-6.41973	907.243	4869.34	329.238	12.6884	284.117	15.2862
7100400102	PSP	49.4156	-72.7409	B	64	26	10	441	F	Deciduous	Glacial without particular morphology	Thin to very thin	Well drained	0	5	5west	5d	31.0742	64.9086	147.775	1189.53	234.894	128.539	394.598	2299.54	13.3279	15.8127	170.984	380.201	36.0768	6.47043	0.0606949	-6.3518	911.449	4865.71	329.106	12.7201	285.605	15.379
7100400102	PSP	49.4156	-72.7409	B	69	21	10	441	F	Deciduous	Glacial without particular morphology	Thin to very thin	Well drained	0	5	5west	5d	31.0742	64.9086	147.775	1189.53	234.894	128.539	394.598	2299.54	13.3279	15.8127	170.984	380.201	36.0768	6.47043	0.0606949	-6.3518	911.449	4865.71	329.106	12.7201	285.605	15.379
7100400102	PSP	49.4156	-72.7409	C	72	19	9	441	F	Deciduous	Glacial without particular morphology	Thin to very thin	Well drained	0	5	5west	5d	31.0742	64.9086	147.775	1189.53	234.894	128.539	394.598	2299.54	13.3279	15.8127	170.984	380.201	36.0768	6.47043	0.0606949	-6.3518	911.449	4865.71	329.106	12.7201	285.605	15.379
7100400201	PSP	49.6022	-72.732	B	68	26	6	461	B	Coniferous	Glacial without particular morphology	Thin	Somewhat poorly drained	0	5	5west	5d	31.1135	63.4389	144.306	1144.1	235.453	117.353	358.234	2139.36	13.502	15.4923	173.014	373.769	36.8969	6.18774	-0.269203	-6.74254	897.984	4892.19	331.537	12.7731	281.198	15.3418
7100400202	PSP	49.6059	-72.7318	B	76	16	8	465	D	Coniferous	Glacial without particular morphology	Thick	Moderately well drained	2	5	5west	5d	31.1135	63.4389	144.306	1144.1	235.453	117.353	358.234	2139.36	13.502	15.4923	173.014	373.769	36.8969	6.18774	-0.269203	-6.74254	897.984	4892.19	331.537	12.7731	281.198	15.3418
7100400202	PSP	49.6059	-72.7318	C	74	18	8	465	D	Coniferous	Glacial without particular morphology	Thick	Moderately well drained	2	5	5west	5d	31.1135	63.4389	144.306	1144.1	235.453	117.353	358.234	2139.36	13.502	15.4923	173.014	373.769	36.8969	6.18774	-0.269203	-6.74254	897.984	4892.19	331.537	12.7731	281.198	15.3418
7100400301	PSP	49.6357	-72.6495	B	74	18	8	450	B	Coniferous	Glacial without particular morphology	Thin	Moderately well drained	2	6	6west	6e	31.0192	62.845	143.664	1141.85	234.737	116.515	355.43	2127.72	13.5248	15.5008	172.891	373.412	36.981	6.14925	-0.316167	-6.80285	898.895	4894.6	332.561	12.7697	281.299	15.3055
7100400301	PSP	49.6357	-72.6495	B	76	10	14	450	B	Coniferous	Glacial without particular morphology	Thin	Moderately well drained	2	6	6west	6e	31.0192	62.845	143.664	1141.85	234.737	116.515	355.43	2127.72	13.5248	15.5008	172.891	373.412	36.981	6.14925	-0.316167	-6.80285	898.895	4894.6	332.561	12.7697	281.299	15.3055
7100400401	PSP	49.6524	-72.5986	B	76	14	10	422	D	Coniferous	Glacial without particular morphology	Thick	Moderately well drained	1	6	6west	6e	31.8665	65.5051	146.307	1180.01	235.896	119.712	365.452	2171.58	13.6436	15.7721	171.392	378.287	36.4717	6.31805	-0.135694	-6.61615	900.671	4868.55	328.679	12.9191	281.885	15.6165
7100400401	PSP	49.6524	-72.5986	C	80	14	6	422	D	Coniferous	Glacial without particular morphology	Thick	Moderately well drained	1	6	6west	6e	31.8665	65.5051	146.307	1180.01	235.896	119.712	365.452	2171.58	13.6436	15.7721	171.392	378.287	36.4717	6.31805	-0.135694	-6.61615	900.671	4868.55	328.679	12.9191	281.885	15.6165
7100400402	PSP	49.6533	-72.6045	B	76	16	8	430	B	Coniferous	Glacial without particular morphology	Thick	Moderately well drained	1	6	6west	6e	31.6686	65.1576	145.756	1173.82	235.779	119.192	363.751	2160.8	13.6219	15.7193	171.624	377.552	36.5354	6.29871	-0.162177	-6.65493	900.127	4873.54	329.006	12.8912	281.727	15.557
7100400402	PSP	49.6533	-72.6045	C	80	17	3	430	B	Coniferous	Glacial without particular morphology	Thick	Moderately well drained	1	6	6west	6e	31.6686	65.1576	145.756	1173.82	235.779	119.192	363.751	2160.8	13.6219	15.7193	171.624	377.552	36.5354	6.29871	-0.162177	-6.65493	900.127	4873.54	329.006	12.8912	281.727	15.557
7100400501	PSP	49.9496	-72.8868	B	72	20	8	489	C	Coniferous	Glacial without particular morphology	Medium	Moderately well drained	2	6	6west	6e	22.1819	64.0459	142.065	1119.65	235.709	115.331	387.573	2103.29	13.4243	15.3588	172.65	369.897	36.3196	5.88999	-0.622792	-7.10509	960.679	4895.11	348.545	12.8898	306.448	15.3453
7100400501	PSP	49.9496	-72.8868	B	75	18	7	489	C	Coniferous	Glacial without particular morphology	Medium	Moderately well drained	2	6	6west	6e	22.1819	64.0459	142.065	1119.65	235.709	115.331	387.573	2103.29	13.4243	15.3588	172.65	369.897	36.3196	5.88999	-0.622792	-7.10509	960.679	4895.11	348.545	12.8898	306.448	15.3453
7100400501	PSP	49.9496	-72.8868	C	69	22	9	489	C	Coniferous	Glacial without particular morphology	Medium	Moderately well drained	2	6	6west	6e	22.1819	64.0459	142.065	1119.65	235.709	115.331	387.573	2103.29	13.4243	15.3588	172.65	369.897	36.3196	5.88999	-0.622792	-7.10509	960.679	4895.11	348.545	12.8898	306.448	15.3453
7100400501	PSP	49.9496	-72.8868	C	72	22	6	489	C	Coniferous	Glacial without particular morphology	Medium	Moderately well drained	2	6	6west	6e	22.1819	64.0459	142.065	1119.65	235.709	115.331	387.573	2103.29	13.4243	15.3588	172.65	369.897	36.3196	5.88999	-0.622792	-7.10509	960.679	4895.11	348.545	12.8898	306.448	15.3453
7100400502	PSP	49.9458	-72.8872	B	69	25	6	461	C	Coniferous	Glacial without particular morphology	Thick	Moderately well drained	2	6	6west	6e	22.1819	64.0459	142.065	1119.65	235.709	115.331	387.573	2103.29	13.4243	15.3588	172.65	369.897	36.3196	5.88999	-0.622792	-7.10509	960.679	4895.11	348.545	12.8898	306.448	15.3453
7100400502	PSP	49.9458	-72.8872	B	70	22	8	461	C	Coniferous	Glacial without particular morphology	Thick	Moderately well drained	2	6	6west	6e	22.1819	64.0459	142.065	1119.65	235.709	115.331	387.573	2103.29	13.4243	15.3588	172.65	369.897	36.3196	5.88999	-0.622792	-7.10509	960.679	4895.11	348.545	12.8898	306.448	15.3453
7100400502	PSP	49.9458	-72.8872	B	75	18	7	461	C	Coniferous	Glacial without particular morphology	Thick	Moderately well drained	2	6	6west	6e	22.1819	64.0459	142.065	1119.65	235.709	115.331	387.573	2103.29	13.4243	15.3588	172.65	369.897	36.3196	5.88999	-0.622792	-7.10509	960.679	4895.11	348.545	12.8898	306.448	15.3453
7100400502	PSP	49.9458	-72.8872	C	69	25	6	461	C	Coniferous	Glacial without particular morphology	Thick	Moderately well drained	2	6	6west	6e	22.1819	64.0459	142.065	1119.65	235.709	115.331	387.573	2103.29	13.4243	15.3588	172.65	369.897	36.3196	5.88999	-0.622792	-7.10509	960.679	4895.11	348.545	12.8898	306.448	15.3453
7100400502	PSP	49.9458	-72.8872	C	72	22	6	461	C	Coniferous	Glacial without particular morphology	Thick	Moderately well drained	2	6	6west	6e	22.1819	64.0459	142.065	1119.65	235.709	115.331	387.573	2103.29	13.4243	15.3588	172.65	369.897	36.3196	5.88999	-0.622792	-7.10509	960.679	4895.11	348.545	12.8898	306.448	15.3453
7100400502	PSP	49.9458	-72.8872	C	75	18	7	461	C	Coniferous	Glacial without particular morphology	Thick	Moderately well drained	2	6	6west	6e	22.1819	64.0459	142.065	1119.65	235.709	115.331	387.573	2103.29	13.4243	15.3588	172.65	369.897	36.3196	5.88999	-0.622792	-7.10509	960.679	4895.11	348.545	12.8898	306.448	15.3453
7100400601	PSP	50.118	-72.5176	B	80	14	6	450	D	Coniferous	Glacial without particular morphology	Medium	Moderately well drained	1	6	6west	6e	21.6508	74.2912	145.605	1134.79	241.255	120.656	401.412	2165.49	13.3561	15.4902	167.966	371.909	36.0376	5.78769	-0.502818	-6.74957	940.527	4833.08	338.221	12.3544	304.241	14.813
7100400601	PSP	50.118	-72.5176	C	90	10	0	450	D	Coniferous	Glacial without particular morphology	Medium	Moderately well drained	1	6	6west	6e	21.6508	74.2912	145.605	1134.79	241.255	120.656	401.412	2165.49	13.3561	15.4902	167.966	371.909	36.0376	5.78769	-0.502818	-6.74957	940.527	4833.08	338.221	12.3544	304.241	14.813
7100400602	PSP	50.1152	-72.5217	B	82	12	6	475	C	Mixed	Glacial without particular morphology	Thin to very thin	Moderately well drained	1	6	6east	6h	20.4661	73.0619	143.59	1096.22	240.626	119.765	400.359	2161.67	13.1588	15.2116	168.562	367.142	36.4629	5.51766	-0.725386	-6.98864	945.144	4857.18	344.215	12.1245	307.361	14.4423
7100400701	PSP	50.1678	-72.3825	B	77	14	9	623	E	Mixed	Glacial without particular morphology	Thin	Well drained	1	6	6west	6e	21.5032	66.6794	140.265	1060.73	236.724	119.855	392.175	2170.54	12.9266	15.0214	171.04	362.178	37.3388	5.23266	-1.05733	-7.37114	925.614	4886.59	345.61	12.1275	301.824	14.3489
7100400702	PSP	50.1666	-72.3883	B	83	9	8	615	C	Coniferous	Glacial without particular morphology	Thin	Moderately well drained	1	6	6west	6e	21.4381	63.6695	137.529	1027.01	235.262	118.387	383.171	2164.35	12.767	14.793	172.597	358.038	38.0485	5.03633	-1.26476	-7.6149	919.154	4919.95	349.885	12.0468	299.598	14.1562
7100400801	PSP	50.3175	-72.3168	B	61	28	11	580	D	Coniferous	Glacial without particular morphology	Thin	Somewhat poorly drained	5	6	6west	6g	19.4813	85.7245	147.787	1123.83	248.75	128.186	431.909	2247.19	13.0277	15.4396	164.031	370.145	35.7534	5.40047	-0.666887	-6.60094	941.706	4789.87	336.186	11.7269	310.62	14.0445
7100400802	PSP	50.3142	-72.3204	B	22	24	54	581	C	Coniferous	Glacial without particular morphology	Thin	Somewhat poorly drained	0	6	6west	6g	18.4942	81.8553	144.841	1082.77	246.651	126.92	429.331	2245.8	12.8332	15.1675	165.801	364.577	36.506	5.09949	-0.957548	-6.98541	946.256	4829.16	345.107	11.6156	312.795	13.7918
7100400901	PSP	50.4186	-72.4829	B	81	17	2	493	C	Coniferous	Glacial without particular morphology	Medium	Moderately well drained	1	6	6west	6g	19.4268	74.2734	145.515	1104.64	241.414	125.789	422.688	2217.13	12.9904	15.3351	168.139	367.436	35.7991	5.37176	-0.795358	-6.9185	939.394	4796.95	336.233	11.9105	311.697	14.3217
7100400901	PSP	50.4186	-72.4829	C	78	20	2	493	C	Coniferous	Glacial without particular morphology	Medium	Moderately well drained	1	6	6west	6g	19.4268	74.2734	145.515	1104.64	241.414	125.789	422.688	2217.13	12.9904	15.3351	168.139	367.436	35.7991	5.37176	-0.795358	-6.9185	939.394	4796.95	336.233	11.9105	311.697	14.3217
7100400902	PSP	50.4156	-72.487	B	70	22	8	480	B	Coniferous	Glacial without particular morphology	Thick	Moderately well drained	1	6	6west	6g	20.0847	76.0581	147.657	1128.36	242.436	127.965	427.698	2246.23	13.0514	15.4611	167.378	370.446	35.5504	5.53648	-0.607611	-6.75648	938.282	4778.53	333.41	11.9561	309.834	14.4417
7100400902	PSP	50.4156	-72.487	B	77	12	11	480	B	Coniferous	Glacial without particular morphology	Thick	Moderately well drained	1	6	6west	6g	20.0847	76.0581	147.657	1128.36	242.436	127.965	427.698	2246.23	13.0514	15.4611	167.378	370.446	35.5504	5.53648	-0.607611	-6.75648	938.282	4778.53	333.41	11.9561	309.834	14.4417
7100400902	PSP	50.4156	-72.487	C	73	23	4	480	B	Coniferous	Glacial without particular morphology	Thick	Moderately well drained	1	6	6west	6g	20.0847	76.0581	147.657	1128.36	242.436	127.965	427.698	2246.23	13.0514	15.4611	167.378	370.446	35.5504	5.53648	-0.607611	-6.75648	938.282	4778.53	333.41	11.9561	309.834	14.4417
7100400902	PSP	50.4156	-72.487	C	78	12	10	480	B	Coniferous	Glacial without particular morphology	Thick	Moderately well drained	1	6	6west	6g	20.0847	76.0581	147.657	1128.36	242.436	127.965	427.698	2246.23	13.0514	15.4611	167.378	370.446	35.5504	5.53648	-0.607611	-6.75648	938.282	4778.53	333.41	11.9561	309.834	14.4417
7100401001	PSP	50.5177	-72.4344	B	70	24	6	497	B	Coniferous	Glacial without particular morphology	Thick	Moderately well drained	1	6	6west	6g	18.983	75.0211	145.972	1104.05	242.332	126.302	425.489	2212.74	12.963	15.3236	168.312	367.041	35.6415	5.29742	-0.89851	-7.20842	937.809	4780.05	334.243	11.8065	312.541	14.2633
7100401001	PSP	50.5177	-72.4344	B	82	9	9	497	B	Coniferous	Glacial without particular morphology	Thick	Moderately well drained	1	6	6west	6g	18.983	75.0211	145.972	1104.05	242.332	126.302	425.489	2212.74	12.963	15.3236	168.312	367.041	35.6415	5.29742	-0.89851	-7.20842	937.809	4780.05	334.243	11.8065	312.541	14.2633
7100401001	PSP	50.5177	-72.4344	C	80	19	1	497	B	Coniferous	Glacial without particular morphology	Thick	Moderately well drained	1	6	6west	6g	18.983	75.0211	145.972	1104.05	242.332	126.302	425.489	2212.74	12.963	15.3236	168.312	367.041	35.6415	5.29742	-0.89851	-7.20842	937.809	4780.05	334.243	11.8065	312.541	14.2633
7100401001	PSP	50.5177	-72.4344	C	87	6	7	497	B	Coniferous	Glacial without particular morphology	Thick	Moderately well drained	1	6	6west	6g	18.983	75.0211	145.972	1104.05	242.332	126.302	425.489	2212.74	12.963	15.3236	168.312	367.041	35.6415	5.29742	-0.89851	-7.20842	937.809	4780.05	334.243	11.8065	312.541	14.2633
7100401002	PSP	50.513	-72.4343	B	76	12	12	500	C	Coniferous	Glacial without particular morphology	Thick	Moderately well drained	1	6	6west	6g	19.0092	74.58	145.506	1097.8	242.098	126.041	423.312	2207.58	12.9372	15.2893	168.518	366.356	35.7492	5.28132	-0.958205	-7.23831	936.184	4784.63	334.557	11.8113	311.121	14.261
7100401002	PSP	50.513	-72.4343	B	80	14	6	500	C	Coniferous	Glacial without particular morphology	Thick	Moderately well drained	1	6	6west	6g	19.0092	74.58	145.506	1097.8	242.098	126.041	423.312	2207.58	12.9372	15.2893	168.518	366.356	35.7492	5.28132	-0.958205	-7.23831	936.184	4784.63	334.557	11.8113	311.121	14.261
7100401002	PSP	50.513	-72.4343	C	74	24	2	500	C	Coniferous	Glacial without particular morphology	Thick	Moderately well drained	1	6	6west	6g	19.0092	74.58	145.506	1097.8	242.098	126.041	423.312	2207.58	12.9372	15.2893	168.518	366.356	35.7492	5.28132	-0.958205	-7.23831	936.184	4784.63	334.557	11.8113	311.121	14.261
7100401002	PSP	50.513	-72.4343	C	92	2	6	500	C	Coniferous	Glacial without particular morphology	Thick	Moderately well drained	1	6	6west	6g	19.0092	74.58	145.506	1097.8	242.098	126.041	423.312	2207.58	12.9372	15.2893	168.518	366.356	35.7492	5.28132	-0.958205	-7.23831	936.184	4784.63	334.557	11.8113	311.121	14.261
7100401101	PSP	50.6683	-72.3842	B	80	12	8	553	C	Coniferous	Glacial without particular morphology	Thick	Moderately well drained	2	6	6west	6g	16.1315	69.3976	140.841	1040.24	239.573	121.224	420.133	2143.1	12.7708	14.9476	171.173	358.794	36.0449	4.84026	-1.43338	-7.77881	943.918	4808.43	339.559	11.6928	318.225	14.0047
7100600101	PSP	46.8658	-71.6665	B	60	30	10	197	C	Deciduous	Glacial without particular morphology	Medium	Somewhat poorly drained	5	4	4east	4d	18.1627	115.45	182.282	1557.94	258.885	163.847	690.996	2863.86	14.0728	17.9731	144.433	433.852	30.6193	8.96699	3.37658	-2.21201	1338.91	4912.1	409.477	11.905	378.86	15.1073
7100600101	PSP	46.8658	-71.6665	C	49	33	18	197	C	Deciduous	Glacial without particular morphology	Medium	Somewhat poorly drained	5	4	4east	4d	18.1627	115.45	182.282	1557.94	258.885	163.847	690.996	2863.86	14.0728	17.9731	144.433	433.852	30.6193	8.96699	3.37658	-2.21201	1338.91	4912.1	409.477	11.905	378.86	15.1073
7100600102	PSP	46.8646	-71.6609	B	64	32	4	200	C	Deciduous	Glacial without particular morphology	Medium	Moderately well drained	2	4	4east	4d	18.1627	115.45	182.282	1557.94	258.885	163.847	690.996	2863.86	14.0728	17.9731	144.433	433.852	30.6193	8.96699	3.37658	-2.21201	1338.91	4912.1	409.477	11.905	378.86	15.1073
7100600102	PSP	46.8646	-71.6609	C	57	31	12	200	C	Deciduous	Glacial without particular morphology	Medium	Moderately well drained	2	4	4east	4d	18.1627	115.45	182.282	1557.94	258.885	163.847	690.996	2863.86	14.0728	17.9731	144.433	433.852	30.6193	8.96699	3.37658	-2.21201	1338.91	4912.1	409.477	11.905	378.86	15.1073
7100600201	PSP	46.8835	-71.7151	B	61	34	5	183	C	Mixed	Glacial without particular morphology	Thick	Somewhat poorly drained	5	4	4east	4d	19.8391	119.992	186.469	1622.06	260.733	167.963	688.555	2884.63	14.2501	18.3257	141.74	441.329	29.5886	9.23188	3.72696	-1.84461	1297.17	4844.12	383.064	12.0001	370.904	15.313
7100600202	PSP	46.8873	-71.7148	B	50	42	8	230	C	Deciduous	Glacial without particular morphology	Medium	Moderately well drained	2	4	4east	4d	15.9259	113.663	179.641	1543.93	257.768	160.377	690.345	2832.86	14.1516	17.8455	145.102	432.185	30.9963	9.03215	3.33736	-2.23901	1372.08	4963.77	424.407	11.97	389.534	15.0866
7100600202	PSP	46.8873	-71.7148	C	72	26	2	230	C	Deciduous	Glacial without particular morphology	Medium	Moderately well drained	2	4	4east	4d	15.9259	113.663	179.641	1543.93	257.768	160.377	690.345	2832.86	14.1516	17.8455	145.102	432.185	30.9963	9.03215	3.33736	-2.23901	1372.08	4963.77	424.407	11.97	389.534	15.0866
7100600301	PSP	46.8998	-71.6685	B	63	27	10	357	B	Deciduous	Glacial without particular morphology	Medium	Moderately well drained	5	4	4east	4d	12.535	110.936	176.679	1455.73	256.37	155.97	710.654	2775.62	13.8364	17.3318	146.446	421.556	32.4191	8.52896	3.02776	-2.3598	1456.05	5000.75	471.179	11.3373	410.3	14.157
7100600301	PSP	46.8998	-71.6685	C	71	21	8	357	B	Deciduous	Glacial without particular morphology	Medium	Moderately well drained	5	4	4east	4d	12.535	110.936	176.679	1455.73	256.37	155.97	710.654	2775.62	13.8364	17.3318	146.446	421.556	32.4191	8.52896	3.02776	-2.3598	1456.05	5000.75	471.179	11.3373	410.3	14.157
7100600302	PSP	46.9012	-71.6631	C	51	43	6	360	A	Mixed	Glacial without particular morphology	Medium	Poorly drained	8	4	4east	4d	14.2054	118.03	180.46	1502.92	259.921	159.702	714.738	2805.67	13.9584	17.618	142.9	427.212	31.7694	8.71663	3.28774	-1.60817	1423.79	4945.52	451.32	11.1026	401.349	14.139
7100600401	PSP	46.9337	-71.7665	B	75	23	2	238	C	Mixed	Glacial without particular morphology	Medium	Well drained	2	4	4east	4d	12.2527	114.46	179.648	1535.16	258.505	158.842	719.676	2799.97	14.1666	17.753	145.045	431.035	30.9018	8.96625	3.35026	-2.20606	1438.37	4967.57	444.051	11.9913	413.615	15.0026
7100600401	PSP	46.9337	-71.7665	C	46	46	8	238	C	Mixed	Glacial without particular morphology	Medium	Well drained	2	4	4east	4d	12.2527	114.46	179.648	1535.16	258.505	158.842	719.676	2799.97	14.1666	17.753	145.045	431.035	30.9018	8.96625	3.35026	-2.20606	1438.37	4967.57	444.051	11.9913	413.615	15.0026
7100600402	PSP	46.9298	-71.7659	B	81	17	2	257	C	Deciduous	Glacial without particular morphology	Medium	Somewhat poorly drained	2	4	4east	4d	12.2527	114.46	179.648	1535.16	258.505	158.842	719.676	2799.97	14.1666	17.753	145.045	431.035	30.9018	8.96625	3.35026	-2.20606	1438.37	4967.57	444.051	11.9913	413.615	15.0026
7100600402	PSP	46.9298	-71.7659	C	73	23	4	257	C	Deciduous	Glacial without particular morphology	Medium	Somewhat poorly drained	2	4	4east	4d	12.2527	114.46	179.648	1535.16	258.505	158.842	719.676	2799.97	14.1666	17.753	145.045	431.035	30.9018	8.96625	3.35026	-2.20606	1438.37	4967.57	444.051	11.9913	413.615	15.0026
7100600501	PSP	46.9498	-71.1823	B	56	33	11	300	D	Deciduous	Glacial without particular morphology	Medium	Moderately well drained	2	4	4east	4d	16.7368	127.108	183.409	1529.31	264.774	170.561	716.832	2976.64	13.6707	17.8024	138.661	429.438	34.0285	8.54529	3.46896	-1.66178	1402.88	4975.26	476.687	11.3788	391.859	14.2458
7100600502	PSP	46.951	-71.1769	B	68	25	7	331	B	Deciduous	Glacial without particular morphology	Medium	Moderately well drained	2	4	4east	4d	15.35	123.798	179.517	1481.45	263.177	165.243	698.872	2915.93	13.5939	17.4864	140.364	423.767	34.3965	8.41108	3.17822	-1.8466	1408.46	5029.16	481.326	11.3713	390.252	14.0968
7100600601	PSP	46.9669	-70.8997	B	56	22	22	70	B	Deciduous	Glacial without particular morphology	Medium	Moderately well drained	3	2	2east	2b	25.4834	153.032	200.931	1749.29	277.887	187.598	729.067	2977.22	14.1217	19.1374	125.865	456.705	26.0977	9.18777	4.65932	0.11508	1194.28	4580.35	310.128	10.2811	358.023	13.5999
7100600601	PSP	46.9669	-70.8997	C	65	15	20	70	B	Deciduous	Glacial without particular morphology	Medium	Moderately well drained	3	2	2east	2b	25.4834	153.032	200.931	1749.29	277.887	187.598	729.067	2977.22	14.1217	19.1374	125.865	456.705	26.0977	9.18777	4.65932	0.11508	1194.28	4580.35	310.128	10.2811	358.023	13.5999
7100600602	PSP	46.9706	-70.9002	B	51	25	24	88	B	Deciduous	Glacial without particular morphology	Medium	Moderately well drained	2	2	2east	2b	24.6171	149.867	198.639	1733.49	276.505	184.973	718.88	2974.8	14.1538	19.0107	127.632	454.581	27.2912	9.17357	4.5373	-0.0181255	1206.81	4638.81	326.19	10.2845	358.996	13.5983
7100600602	PSP	46.9706	-70.9002	C	82	7	11	88	B	Deciduous	Glacial without particular morphology	Medium	Moderately well drained	2	2	2east	2b	24.6171	149.867	198.639	1733.49	276.505	184.973	718.88	2974.8	14.1538	19.0107	127.632	454.581	27.2912	9.17357	4.5373	-0.0181255	1206.81	4638.81	326.19	10.2845	358.996	13.5983
7100600701	PSP	46.9664	-71.1662	B	52	38	10	296	C	Deciduous	Glacial without particular morphology	Medium	Moderately well drained	2	4	4east	4d	14.6844	117.772	176.771	1428.07	260.407	162.591	692.689	2906.25	13.4029	17.1054	143.59	417.824	35.0658	8.20064	2.95538	-1.87931	1421.41	5055.05	498.661	10.9786	398.152	13.8949
7100600701	PSP	46.9664	-71.1662	C	70	20	10	296	C	Deciduous	Glacial without particular morphology	Medium	Moderately well drained	2	4	4east	4d	14.6844	117.772	176.771	1428.07	260.407	162.591	692.689	2906.25	13.4029	17.1054	143.59	417.824	35.0658	8.20064	2.95538	-1.87931	1421.41	5055.05	498.661	10.9786	398.152	13.8949
7100600702	PSP	46.9633	-71.1626	B	50	40	10	340	D	Deciduous	Glacial without particular morphology	Medium	Moderately well drained	2	4	4east	4d	14.6844	117.772	176.771	1428.07	260.407	162.591	692.689	2906.25	13.4029	17.1054	143.59	417.824	35.0658	8.20064	2.95538	-1.87931	1421.41	5055.05	498.661	10.9786	398.152	13.8949
7100600702	PSP	46.9633	-71.1626	C	67	19	14	340	D	Deciduous	Glacial without particular morphology	Medium	Moderately well drained	2	4	4east	4d	14.6844	117.772	176.771	1428.07	260.407	162.591	692.689	2906.25	13.4029	17.1054	143.59	417.824	35.0658	8.20064	2.95538	-1.87931	1421.41	5055.05	498.661	10.9786	398.152	13.8949
7100600802	PSP	46.97	-71.2668	B	67	20	13	425	D	Deciduous	Glacial without particular morphology	Medium	Moderately well drained	2	4	4east	4d	14.9374	106.367	170.866	1325.39	255.453	152.704	653.462	2760.96	13.198	16.4144	150.118	403.081	37.5243	7.43626	2.3735	-2.41191	1442.1	5070.42	542.064	10.3343	395.125	12.6271
7100600902	PSP	46.9868	-71.0504	B	42	44	14	252	D	Coniferous	Glacial without particular morphology	Thin to very thin	Moderately well drained	2	4	4east	4d	16.7175	133.392	185.328	1562.37	268.484	171.883	720.847	2923.58	13.8171	18.0366	136.094	432.416	31.2259	8.48406	3.54227	-1.42454	1336.37	4862.3	416.201	10.9148	386.516	13.7725
7100601001	PSP	47.0169	-71.1352	B	68	22	10	469	D	Mixed	Glacial without particular morphology	Thin to very thin	Moderately well drained	2	4	4east	4d	12.4268	106.091	171.88	1329.41	255.711	154.355	675.729	2813.12	13.1913	16.4476	150.617	405.323	36.6951	7.60687	2.40644	-2.83765	1472.58	5098.94	539.53	10.799	405.931	13.2535
7100601001	PSP	47.0169	-71.1352	C	70	23	7	469	D	Mixed	Glacial without particular morphology	Thin to very thin	Moderately well drained	2	4	4east	4d	12.4268	106.091	171.88	1329.41	255.711	154.355	675.729	2813.12	13.1913	16.4476	150.617	405.323	36.6951	7.60687	2.40644	-2.83765	1472.58	5098.94	539.53	10.799	405.931	13.2535
7100601002	PSP	47.0138	-71.1388	B	76	16	8	465	B	Coniferous	Glacial without particular morphology	Medium	Moderately well drained	2	4	4east	4d	12.4268	106.091	171.88	1329.41	255.711	154.355	675.729	2813.12	13.1913	16.4476	150.617	405.323	36.6951	7.60687	2.40644	-2.83765	1472.58	5098.94	539.53	10.799	405.931	13.2535
7100601101	PSP	47.0172	-71.3995	B	56	36	8	509	D	Deciduous	Glacial without particular morphology	Medium	Moderately well drained	3	4	4east	4d	11.8438	81.1829	155.886	1198.5	241.735	135.172	589.051	2628.33	13.1079	15.6558	161.542	390.045	38.8804	7.45011	1.53653	-4.34442	1479.68	5315.9	574.827	11.765	398.957	13.9711
7100601101	PSP	47.0172	-71.3995	C	64	29	7	509	D	Deciduous	Glacial without particular morphology	Medium	Moderately well drained	3	4	4east	4d	11.8438	81.1829	155.886	1198.5	241.735	135.172	589.051	2628.33	13.1079	15.6558	161.542	390.045	38.8804	7.45011	1.53653	-4.34442	1479.68	5315.9	574.827	11.765	398.957	13.9711
7100601102	PSP	47.0202	-71.3958	B	66	27	7	534	C	Coniferous	Glacial without particular morphology	Thin to very thin	Moderately well drained	2	4	4east	4d	11.8438	81.1829	155.886	1198.5	241.735	135.172	589.051	2628.33	13.1079	15.6558	161.542	390.045	38.8804	7.45011	1.53653	-4.34442	1479.68	5315.9	574.827	11.765	398.957	13.9711
7100601102	PSP	47.0202	-71.3958	C	74	19	7	534	C	Coniferous	Glacial without particular morphology	Thin to very thin	Moderately well drained	2	4	4east	4d	11.8438	81.1829	155.886	1198.5	241.735	135.172	589.051	2628.33	13.1079	15.6558	161.542	390.045	38.8804	7.45011	1.53653	-4.34442	1479.68	5315.9	574.827	11.765	398.957	13.9711
7100601201	PSP	47.0324	-71.1172	B	76	18	6	575	C	Mixed	Glacial without particular morphology	Medium	Moderately well drained	5	4	4east	4d	11.8302	96.3683	165.815	1241.87	250.911	147.087	636.698	2735.52	12.9389	15.8018	155.552	393.389	38.8229	7.08773	1.87269	-3.38864	1473.99	5158.33	573.079	10.5481	402.3	12.7337
7100601201	PSP	47.0324	-71.1172	C	70	22	8	575	C	Mixed	Glacial without particular morphology	Medium	Moderately well drained	5	4	4east	4d	11.8302	96.3683	165.815	1241.87	250.911	147.087	636.698	2735.52	12.9389	15.8018	155.552	393.389	38.8229	7.08773	1.87269	-3.38864	1473.99	5158.33	573.079	10.5481	402.3	12.7337
7100601202	PSP	47.0293	-71.1135	B	56	33	11	613	D	Coniferous	Glacial without particular morphology	Medium	Moderately well drained	2	4	4east	4d	10.6177	86.2589	159.492	1158.78	246.011	138.939	605.897	2652.14	12.7146	15.2071	160.778	383.561	40.507	6.76751	1.42897	-3.84547	1493.97	5242.15	605.445	10.514	402.675	12.5415
7100601301	PSP	47.0672	-71.3661	B	46	46	8	535	D	Mixed	Glacial without particular morphology	Medium	Well drained	2	4	4east	4d	11.8025	81.4435	158.278	1200.6	242.303	135.81	587.405	2602.45	13.0952	15.6256	161.861	389.189	39.2203	7.28633	1.58415	-4.05411	1476.21	5257.4	578.59	11.2633	396.146	13.5393
7100601302	PSP	47.0704	-71.3626	B	50	40	10	542	D	Mixed	Glacial without particular morphology	Medium	Well drained	2	4	4east	4d	11.8025	81.4435	158.278	1200.6	242.303	135.81	587.405	2602.45	13.0952	15.6256	161.861	389.189	39.2203	7.28633	1.58415	-4.05411	1476.21	5257.4	578.59	11.2633	396.146	13.5393
7100601401	PSP	47.0825	-70.9496	B	76	16	8	482	C	Mixed	Glacial without particular morphology	Medium	Somewhat poorly drained	2	4	4east	4d	14.097	96.3095	165.229	1247.76	252.084	146.838	610.173	2740.23	12.9825	15.8795	156.76	393.616	38.4614	7.2278	1.83157	-3.50188	1413.89	5165.63	543.737	10.7234	384.831	13.0595
7100601401	PSP	47.0825	-70.9496	C	58	30	12	482	C	Mixed	Glacial without particular morphology	Medium	Somewhat poorly drained	2	4	4east	4d	14.097	96.3095	165.229	1247.76	252.084	146.838	610.173	2740.23	12.9825	15.8795	156.76	393.616	38.4614	7.2278	1.83157	-3.50188	1413.89	5165.63	543.737	10.7234	384.831	13.0595
7100601402	PSP	47.0816	-70.9551	B	80	12	8	425	D	Deciduous	Glacial without particular morphology	Medium	Moderately well drained	1	4	4east	4d	16.4843	112.11	173.406	1344.77	259.459	159.55	664.002	2851.35	13.0915	16.7374	148.373	405.661	35.5977	7.4758	2.3247	-2.91216	1369.75	5017.08	486.458	10.6609	378.285	13.1159
7100601501	PSP	47.0836	-71.0656	B	72	19	9	634	E	Mixed	Glacial without particular morphology	Medium	Moderately well drained	2	4	4east	4d	10.9804	69.39	152.135	1097.81	237.735	131.532	565.398	2584.79	12.597	14.8048	169.341	376.479	41.4374	6.72356	0.997127	-4.72131	1481.49	5356.37	614.124	11.0229	397.714	13.0544
7100601501	PSP	47.0836	-71.0656	C	70	20	10	634	E	Mixed	Glacial without particular morphology	Medium	Moderately well drained	2	4	4east	4d	10.9804	69.39	152.135	1097.81	237.735	131.532	565.398	2584.79	12.597	14.8048	169.341	376.479	41.4374	6.72356	0.997127	-4.72131	1481.49	5356.37	614.124	11.0229	397.714	13.0544
7100601502	PSP	47.0845	-71.0713	B	66	26	8	627	D	Coniferous	Glacial without particular morphology	Medium	Moderately well drained	2	4	4east	4d	11.221	79.5583	157.37	1162.69	242.809	137.101	585.326	2614.75	12.7858	15.2617	164.251	384.054	39.9039	6.9488	1.35567	-4.30218	1462.44	5260.47	584.149	11.0007	395.296	13.0981
7100601502	PSP	47.0845	-71.0713	C	72	20	8	627	D	Coniferous	Glacial without particular morphology	Medium	Moderately well drained	2	4	4east	4d	11.221	79.5583	157.37	1162.69	242.809	137.101	585.326	2614.75	12.7858	15.2617	164.251	384.054	39.9039	6.9488	1.35567	-4.30218	1462.44	5260.47	584.149	11.0007	395.296	13.0981
7100601602	PSP	47.0867	-71.5333	B	66	24	10	674	E	Coniferous	Glacial without particular morphology	Thin	Moderately well drained	2	5	5east	5e	9.0798	69.2357	149.911	1125.56	235.352	127.206	577.086	2521.79	12.9524	15.0888	167.11	381.146	38.9277	7.17327	1.14307	-4.87252	1510.23	5361.49	587.756	11.6021	412.753	13.7422
7100601602	PSP	47.0867	-71.5333	B	77	18	5	674	E	Coniferous	Glacial without particular morphology	Thin	Moderately well drained	2	5	5east	5e	9.0798	69.2357	149.911	1125.56	235.352	127.206	577.086	2521.79	12.9524	15.0888	167.11	381.146	38.9277	7.17327	1.14307	-4.87252	1510.23	5361.49	587.756	11.6021	412.753	13.7422
7100601602	PSP	47.0867	-71.5333	C	77	18	5	674	E	Coniferous	Glacial without particular morphology	Thin	Moderately well drained	2	5	5east	5e	9.0798	69.2357	149.911	1125.56	235.352	127.206	577.086	2521.79	12.9524	15.0888	167.11	381.146	38.9277	7.17327	1.14307	-4.87252	1510.23	5361.49	587.756	11.6021	412.753	13.7422
7100601701	PSP	47.0997	-70.7998	B	66	26	8	400	B	Mixed	Glacial without particular morphology	Medium	Moderately well drained	2	4	4east	4d	19.5409	118.322	176.127	1386.91	261.698	163.746	649.24	2902.54	13.1615	16.8271	144.348	411.809	33.9048	7.94628	2.73432	-2.42583	1292.92	4990.23	437.41	10.7666	367.706	13.3183
7100601702	PSP	47.0986	-70.7944	B	56	32	12	358	D	Deciduous	Glacial without particular morphology	Medium	Moderately well drained	2	4	4east	4d	19.5409	118.322	176.127	1386.91	261.698	163.746	649.24	2902.54	13.1615	16.8271	144.348	411.809	33.9048	7.94628	2.73432	-2.42583	1292.92	4990.23	437.41	10.7666	367.706	13.3183
7100601702	PSP	47.0986	-70.7944	C	62	28	10	358	D	Deciduous	Glacial without particular morphology	Medium	Moderately well drained	2	4	4east	4d	19.5409	118.322	176.127	1386.91	261.698	163.746	649.24	2902.54	13.1615	16.8271	144.348	411.809	33.9048	7.94628	2.73432	-2.42583	1292.92	4990.23	437.41	10.7666	367.706	13.3183
7100601801	PSP	47.1014	-70.9458	B	72	20	8	467	C	Mixed	Glacial without particular morphology	Medium	Moderately well drained	2	4	4east	4d	14.5972	95.4492	164.25	1235.16	251.622	145.391	600.282	2703.95	12.9536	15.794	157.174	391.709	38.1734	7.17913	1.78858	-3.55011	1396.52	5151.87	533.388	10.6578	382.342	12.9083
7100601801	PSP	47.1014	-70.9458	C	86	8	6	467	C	Mixed	Glacial without particular morphology	Medium	Moderately well drained	2	4	4east	4d	14.5972	95.4492	164.25	1235.16	251.622	145.391	600.282	2703.95	12.9536	15.794	157.174	391.709	38.1734	7.17913	1.78858	-3.55011	1396.52	5151.87	533.388	10.6578	382.342	12.9083
7100601802	PSP	47.0982	-70.9425	B	74	17	9	472	B	Mixed	Fluvial	Thick	Moderately well drained	2	4	4east	4d	15.968	104.162	169.395	1300.31	256.034	152.344	628.247	2770.3	13.0901	16.281	152.871	400.025	36.2507	7.46066	2.15224	-3.13111	1370.15	5072.93	495.863	10.6979	380.516	13.1042
7100601802	PSP	47.0982	-70.9425	C	92	4	4	472	B	Mixed	Fluvial	Thick	Moderately well drained	2	4	4east	4d	15.968	104.162	169.395	1300.31	256.034	152.344	628.247	2770.3	13.0901	16.281	152.871	400.025	36.2507	7.46066	2.15224	-3.13111	1370.15	5072.93	495.863	10.6979	380.516	13.1042
7100601901	PSP	47.1159	-70.7999	B	56	34	10	456	C	Coniferous	Glacial without particular morphology	Medium	Moderately well drained	2	4	4east	4d	17.7093	109.858	170.264	1297.22	258.333	155.724	621.172	2820.37	12.9477	16.1892	149.467	399.805	35.9728	7.4444	2.22275	-2.95131	1316.5	5064.04	473.572	10.6273	370.598	12.8115
7100601901	PSP	47.1159	-70.7999	B	59	30	11	456	C	Coniferous	Glacial without particular morphology	Medium	Moderately well drained	2	4	4east	4d	17.7093	109.858	170.264	1297.22	258.333	155.724	621.172	2820.37	12.9477	16.1892	149.467	399.805	35.9728	7.4444	2.22275	-2.95131	1316.5	5064.04	473.572	10.6273	370.598	12.8115
7100601902	PSP	47.1148	-70.8054	B	74	18	8	415	C	Coniferous	Glacial without particular morphology	Medium	Moderately well drained	2	4	4east	4d	19.0479	113.701	172.879	1349.18	259.835	158.591	627.704	2838.12	13.1362	16.5802	147.127	406.704	35.0603	7.75749	2.50828	-2.76402	1301.75	5030.8	456.42	10.8029	366.353	13.1184
7100602001	PSP	47.1685	-70.7142	B	66	23	11	423	A	Coniferous	Marine and littoral	Thick	Poorly drained	8	4	4east	4d	23.0667	111.292	172.381	1338.05	258.737	158.337	606.812	2859.29	13.0894	16.5569	148.446	405.352	36.3709	7.71175	2.41932	-2.86041	1298.08	5044.31	471.442	10.8226	355.192	13.222
7100602002	PSP	47.1718	-70.7113	B	66	24	10	425	A	Coniferous	Marine and littoral	Thick	Somewhat poorly drained	5	4	4east	4d	23.0667	111.292	172.381	1338.05	258.737	158.337	606.812	2859.29	13.0894	16.5569	148.446	405.352	36.3709	7.71175	2.41932	-2.86041	1298.08	5044.31	471.442	10.8226	355.192	13.222
7100602002	PSP	47.1718	-70.7113	C	62	22	16	425	A	Coniferous	Marine and littoral	Thick	Somewhat poorly drained	5	4	4east	4d	23.0667	111.292	172.381	1338.05	258.737	158.337	606.812	2859.29	13.0894	16.5569	148.446	405.352	36.3709	7.71175	2.41932	-2.86041	1298.08	5044.31	471.442	10.8226	355.192	13.222
7100602002	PSP	47.1718	-70.7113	C	74	17	9	425	A	Coniferous	Marine and littoral	Thick	Somewhat poorly drained	5	4	4east	4d	23.0667	111.292	172.381	1338.05	258.737	158.337	606.812	2859.29	13.0894	16.5569	148.446	405.352	36.3709	7.71175	2.41932	-2.86041	1298.08	5044.31	471.442	10.8226	355.192	13.222
7100602101	PSP	47.1656	-70.8825	B	66	25	9	589	D	Deciduous	Glacial without particular morphology	Thin	Moderately well drained	2	4	4east	4d	14.2707	91.4531	159.645	1164.74	249.696	136.612	560.152	2607.26	12.8822	15.2796	159.246	382.158	40.6702	6.77182	1.38994	-3.99302	1414.36	5233.36	574.44	10.5653	378.989	12.5486
7100602102	PSP	47.1689	-70.8792	B	72	23	5	507	D	Coniferous	Glacial without particular morphology	Medium	Moderately well drained	2	4	4east	4d	16.0835	98.2228	163.912	1233.56	252.706	142.955	567.246	2667.99	13.0671	15.7997	155.467	391.06	38.8934	7.18162	1.7753	-3.57145	1366.05	5155.04	530.757	10.6749	369.845	12.9046
7100602102	PSP	47.1689	-70.8792	C	64	27	9	507	D	Coniferous	Glacial without particular morphology	Medium	Moderately well drained	2	4	4east	4d	16.0835	98.2228	163.912	1233.56	252.706	142.955	567.246	2667.99	13.0671	15.7997	155.467	391.06	38.8934	7.18162	1.7753	-3.57145	1366.05	5155.04	530.757	10.6749	369.845	12.9046
7100602201	PSP	47.1822	-70.9018	B	51	37	12	727	E	Mixed	Glacial without particular morphology	Medium	Moderately well drained	2	4	4east	4d	11.1254	73.668	148.828	1021.26	240.038	125.563	525.464	2499.36	12.3313	14.219	167.373	364.877	43.4237	5.97498	0.516785	-4.96016	1453.74	5378.6	630.854	10.2872	387.645	11.9213
7100602202	PSP	47.1807	-70.9071	B	72	19	9	795	D	Coniferous	Glacial without particular morphology	Medium	Moderately well drained	2	4	4east	4d	11.1254	73.668	148.828	1021.26	240.038	125.563	525.464	2499.36	12.3313	14.219	167.373	364.877	43.4237	5.97498	0.516785	-4.96016	1453.74	5378.6	630.854	10.2872	387.645	11.9213
7100602302	PSP	47.1852	-71.0378	B	84	9	7	724	D	Mixed	Glacial without particular morphology	Medium	Moderately well drained	2	5	5east	5e	9.62447	55.5749	143.643	984.696	230.711	121.619	519.273	2453.62	12.179	14.019	176.136	361.56	43.7073	6.04018	0.298558	-5.43061	1477.38	5429.42	645.751	10.5526	392.969	12.3585
7100602401	PSP	47.1836	-71.1329	B	70	24	6	499	E	Coniferous	Glacial without particular morphology	Medium	Well drained	2	5	5east	5e	10.9138	70.309	152.853	1115.87	237.967	130.663	557.784	2532.15	12.688	14.9915	168.663	378.379	41.1606	6.81161	1.08651	-4.61188	1472.64	5300.54	607.511	10.8664	394.622	13.0636
7100602401	PSP	47.1836	-71.1329	C	70	24	6	499	E	Coniferous	Glacial without particular morphology	Medium	Well drained	2	5	5east	5e	10.9138	70.309	152.853	1115.87	237.967	130.663	557.784	2532.15	12.688	14.9915	168.663	378.379	41.1606	6.81161	1.08651	-4.61188	1472.64	5300.54	607.511	10.8664	394.622	13.0636
7100602402	PSP	47.1831	-71.1273	B	76	16	8	474	E	Mixed	Glacial without particular morphology	Medium	Well drained	2	5	5east	5e	10.9138	70.309	152.853	1115.87	237.967	130.663	557.784	2532.15	12.688	14.9915	168.663	378.379	41.1606	6.81161	1.08651	-4.61188	1472.64	5300.54	607.511	10.8664	394.622	13.0636
7100602501	PSP	47.1993	-70.8831	B	72	21	7	510	D	Mixed	Fluvial	Thick	Moderately well drained	2	5	5east	5e	16.3329	96.4142	163.831	1234.26	252.032	140.611	560.674	2631.46	13.1637	15.83	156.61	391.293	39.0296	7.18211	1.74794	-3.65834	1365.51	5156.18	532.867	10.8325	369.594	13.067
7100602502	PSP	47.1965	-70.8869	B	72	20	8	554	C	Mixed	Glacial without particular morphology	Medium	Moderately well drained	2	4	4east	4d	15.6032	93.2625	161.902	1203.58	250.375	139.707	564.597	2634.03	12.9981	15.6208	158.115	387.401	39.6699	7.00669	1.58229	-3.86598	1387.52	5189.66	550.089	10.7521	373.945	12.8663
7100602502	PSP	47.1965	-70.8869	C	62	26	12	554	C	Mixed	Glacial without particular morphology	Medium	Moderately well drained	2	4	4east	4d	15.6032	93.2625	161.902	1203.58	250.375	139.707	564.597	2634.03	12.9981	15.6208	158.115	387.401	39.6699	7.00669	1.58229	-3.86598	1387.52	5189.66	550.089	10.7521	373.945	12.8663
7100602601	PSP	47.217	-71.1324	B	86	8	6	734	D	Mixed	Glacial without particular morphology	Medium	Moderately well drained	2	5	5east	5e	10.0266	56.3955	149.153	1067.91	231.103	125.078	532.058	2463.79	12.5679	14.6158	175.706	372.563	42.3717	6.62798	0.82227	-4.97975	1494.25	5333.27	633.295	10.832	394.607	12.9895
7100602602	PSP	47.2203	-71.1358	B	80	12	8	740	B	Coniferous	Glacial without particular morphology	Medium	Moderately well drained	2	5	5east	5e	9.12792	51.0649	143.077	995.435	228.324	118.588	514.696	2406.73	12.3447	14.1707	178.262	363.765	43.8424	6.22179	0.362325	-5.48732	1515.32	5418.61	664.963	10.694	399.353	12.6884
7100602602	PSP	47.2203	-71.1358	C	86	7	7	740	B	Coniferous	Glacial without particular morphology	Medium	Moderately well drained	2	5	5east	5e	9.12792	51.0649	143.077	995.435	228.324	118.588	514.696	2406.73	12.3447	14.1707	178.262	363.765	43.8424	6.22179	0.362325	-5.48732	1515.32	5418.61	664.963	10.694	399.353	12.6884
7100602701	PSP	47.217	-71.1654	B	78	14	8	715	F	Coniferous	Glacial without particular morphology	Thin to very thin	Well drained	2	5	5east	5e	11.5414	66.7082	157.479	1172.69	236.424	135.17	560.156	2564.05	12.9154	15.3571	170.708	384.645	40.1972	7.1256	1.42943	-4.31401	1454.19	5206.5	583.472	11.0292	387.77	13.3708
7100602701	PSP	47.217	-71.1654	C	78	14	8	715	F	Coniferous	Glacial without particular morphology	Thin to very thin	Well drained	2	5	5east	5e	11.5414	66.7082	157.479	1172.69	236.424	135.17	560.156	2564.05	12.9154	15.3571	170.708	384.645	40.1972	7.1256	1.42943	-4.31401	1454.19	5206.5	583.472	11.0292	387.77	13.3708
7100602801	PSP	47.2492	-70.8338	B	64	28	8	603	D	Coniferous	Glacial without particular morphology	Medium	Moderately well drained	2	5	5east	5e	17.0544	94.4257	161.06	1200.57	251.057	137.885	536.9	2597.82	13.0628	15.5996	157.623	385.561	39.8117	6.89603	1.50357	-3.84319	1332.39	5176.18	530.058	10.7134	360.367	12.7898
7100602801	PSP	47.2492	-70.8338	C	70	22	8	603	D	Coniferous	Glacial without particular morphology	Medium	Moderately well drained	2	5	5east	5e	17.0544	94.4257	161.06	1200.57	251.057	137.885	536.9	2597.82	13.0628	15.5996	157.623	385.561	39.8117	6.89603	1.50357	-3.84319	1332.39	5176.18	530.058	10.7134	360.367	12.7898
7100602802	PSP	47.2503	-70.8392	B	67	25	8	547	C	Mixed	Glacial without particular morphology	Thick	Somewhat poorly drained	5	5	5east	5e	17.0544	94.4257	161.06	1200.57	251.057	137.885	536.9	2597.82	13.0628	15.5996	157.623	385.561	39.8117	6.89603	1.50357	-3.84319	1332.39	5176.18	530.058	10.7134	360.367	12.7898
7100602802	PSP	47.2503	-70.8392	C	60	30	10	547	C	Mixed	Glacial without particular morphology	Thick	Somewhat poorly drained	5	5	5east	5e	17.0544	94.4257	161.06	1200.57	251.057	137.885	536.9	2597.82	13.0628	15.5996	157.623	385.561	39.8117	6.89603	1.50357	-3.84319	1332.39	5176.18	530.058	10.7134	360.367	12.7898
7100602901	PSP	47.2661	-70.6495	B	80	14	6	657	D	Coniferous	Glacial without particular morphology	Medium	Moderately well drained	2	4	4east	4d	19.2639	100.041	162.222	1170.84	254.142	141.977	532.905	2651.79	12.7302	15.2523	155.104	381.046	40.2533	6.45562	1.44084	-3.58517	1278.5	5142.46	514.97	10.0441	349.596	11.6959
7100602902	PSP	47.2621	-70.6494	B	76	17	7	630	C	Coniferous	Glacial without particular morphology	Medium	Moderately well drained	2	4	4east	4d	19.2639	100.041	162.222	1170.84	254.142	141.977	532.905	2651.79	12.7302	15.2523	155.104	381.046	40.2533	6.45562	1.44084	-3.58517	1278.5	5142.46	514.97	10.0441	349.596	11.6959
7100603001	PSP	47.2669	-71.1835	B	73	20	7	893	D	Coniferous	Glacial without particular morphology	Medium	Somewhat poorly drained	5	5	5east	5e	8.82781	44.1656	134.998	912.252	224.58	111.318	474.09	2319.82	12.0011	13.5406	181.407	353.237	44.8138	5.73306	-0.253971	-6.24736	1465.24	5517.39	657.05	10.6559	392.19	12.3978
7100603001	PSP	47.2669	-71.1835	C	82	10	8	893	D	Coniferous	Glacial without particular morphology	Medium	Somewhat poorly drained	5	5	5east	5e	8.82781	44.1656	134.998	912.252	224.58	111.318	474.09	2319.82	12.0011	13.5406	181.407	353.237	44.8138	5.73306	-0.253971	-6.24736	1465.24	5517.39	657.05	10.6559	392.19	12.3978
7100603002	PSP	47.2704	-71.1802	B	74	14	12	817	D	Coniferous	Glacial without particular morphology	Medium	Moderately well drained	1	5	5east	5e	8.77301	44.7941	136.045	928.282	224.651	111.79	479.295	2332.24	12.0947	13.692	180.855	355.371	44.6076	5.86789	-0.126462	-6.12359	1483.6	5504.45	661.723	10.7233	394.964	12.522
7100603002	PSP	47.2704	-71.1802	C	82	12	6	817	D	Coniferous	Glacial without particular morphology	Medium	Moderately well drained	1	5	5east	5e	8.77301	44.7941	136.045	928.282	224.651	111.79	479.295	2332.24	12.0947	13.692	180.855	355.371	44.6076	5.86789	-0.126462	-6.12359	1483.6	5504.45	661.723	10.7233	394.964	12.522
7100603101	PSP	47.2834	-70.8334	B	64	26	10	690	E	Coniferous	Glacial without particular morphology	Medium	Well drained	2	5	5east	5e	14.2147	86.9265	154.128	1099.65	246.682	131.849	521.263	2552.21	12.6524	14.874	160.77	372.809	42.1517	6.2698	0.894825	-4.50212	1361.85	5285.61	574.988	10.4983	368.375	12.2271
7100603101	PSP	47.2834	-70.8334	C	74	18	8	690	E	Coniferous	Glacial without particular morphology	Medium	Well drained	2	5	5east	5e	14.2147	86.9265	154.128	1099.65	246.682	131.849	521.263	2552.21	12.6524	14.874	160.77	372.809	42.1517	6.2698	0.894825	-4.50212	1361.85	5285.61	574.988	10.4983	368.375	12.2271
7100603102	PSP	47.2805	-70.837	B	76	18	6	632	C	Mixed	Glacial without particular morphology	Thin to very thin	Moderately well drained	2	5	5east	5e	16.2262	93.6211	159.639	1173.35	250.52	137.801	536.493	2612.48	12.8937	15.404	157.896	382.495	40.4903	6.73238	1.34832	-4.01223	1336.59	5205.28	541.981	10.6681	362.717	12.6416
7100603102	PSP	47.2805	-70.837	C	78	11	11	632	C	Mixed	Glacial without particular morphology	Thin to very thin	Moderately well drained	2	5	5east	5e	16.2262	93.6211	159.639	1173.35	250.52	137.801	536.493	2612.48	12.8937	15.404	157.896	382.495	40.4903	6.73238	1.34832	-4.01223	1336.59	5205.28	541.981	10.6681	362.717	12.6416
7100603202	PSP	47.288	-71.1154	B	78	15	7	784	D	Coniferous	Glacial without particular morphology	Thick	Moderately well drained	5	5	5east	5e	9.00457	45.6696	136.377	930.554	224.73	112.573	479.456	2336.67	12.0964	13.7372	180.058	355.311	44.6706	5.83728	-0.133318	-6.11489	1471.4	5497.9	657.965	10.7033	392.551	12.5134
7100603301	PSP	47.2992	-70.6658	B	79	20	1	745	D	Mixed	Glacial without particular morphology	Medium	Moderately well drained	2	4	4east	4d	16.1033	88.7914	152.451	1046.37	248.246	131.481	496.558	2543.4	12.3212	14.3957	160.468	365.845	42.7089	5.77701	0.645253	-4.39489	1288.73	5278.85	551.863	9.90358	352.396	11.2714
7100603301	PSP	47.2992	-70.6658	C	84	15	1	745	D	Mixed	Glacial without particular morphology	Medium	Moderately well drained	2	4	4east	4d	16.1033	88.7914	152.451	1046.37	248.246	131.481	496.558	2543.4	12.3212	14.3957	160.468	365.845	42.7089	5.77701	0.645253	-4.39489	1288.73	5278.85	551.863	9.90358	352.396	11.2714
7100603302	PSP	47.3005	-70.6712	B	88	12	0	692	C	Coniferous	Glacial without particular morphology	Medium	Moderately well drained	2	4	4east	4d	18.2647	96.4332	157.94	1127.23	252.32	137.116	517.209	2600.49	12.6343	14.9793	156.886	375.805	41.074	6.29102	1.1542	-3.90916	1284.4	5199.67	529.866	10.1258	352.637	11.7507
7100603302	PSP	47.3005	-70.6712	C	89	10	1	692	C	Coniferous	Glacial without particular morphology	Medium	Moderately well drained	2	4	4east	4d	18.2647	96.4332	157.94	1127.23	252.32	137.116	517.209	2600.49	12.6343	14.9793	156.886	375.805	41.074	6.29102	1.1542	-3.90916	1284.4	5199.67	529.866	10.1258	352.637	11.7507
7100603401	PSP	47.3001	-70.9319	B	58	34	8	953	B	Coniferous	Glacial without particular morphology	Medium	Very poorly drained	5	5	5east	5e	10.1857	47.6414	128.536	817.789	227.282	102.114	414.994	2164.22	11.6587	12.8412	180.645	340.059	46.2698	4.85591	-0.996402	-6.84004	1354.91	5591.64	628.762	10.2611	373.152	11.5459
7100603501	PSP	47.3	-71.0158	B	76	16	8	709	F	Coniferous	Glacial without particular morphology	Medium	Well drained	2	5	5east	5e	10.837	57.7796	149.656	1078.85	231.547	125.747	520.956	2467.81	12.6473	14.7586	174.768	373.505	42.2134	6.66314	0.857396	-4.9385	1452.03	5307.94	613.192	10.9227	386.08	13.0853
7100603501	PSP	47.3	-71.0158	C	80	13	7	709	F	Coniferous	Glacial without particular morphology	Medium	Well drained	2	5	5east	5e	10.837	57.7796	149.656	1078.85	231.547	125.747	520.956	2467.81	12.6473	14.7586	174.768	373.505	42.2134	6.66314	0.857396	-4.9385	1452.03	5307.94	613.192	10.9227	386.08	13.0853
7100603502	PSP	47.2967	-71.0196	B	76	16	8	779	F	Coniferous	Glacial without particular morphology	Medium	Well drained	2	5	5east	5e	9.6581	49.5375	137.805	930.767	227.794	115.19	482.739	2365.41	12.0263	13.7129	179.255	354.874	44.5658	5.71154	-0.141745	-6.00676	1440.02	5473.85	642.92	10.5759	387.256	12.2951
7100603601	PSP	47.3169	-71.1156	B	72	16	12	795	D	Coniferous	Glacial without particular morphology	Medium	Moderately well drained	2	5	5east	5e	9.50595	48.5849	143.495	1024.09	225.933	117.693	501.366	2386.33	12.5268	14.3665	178.347	367.925	43.3949	6.49281	0.501476	-5.49547	1497.21	5397.9	649.31	11.0172	393.922	13.1681
7100603601	PSP	47.3169	-71.1156	C	74	20	6	795	D	Coniferous	Glacial without particular morphology	Medium	Moderately well drained	2	5	5east	5e	9.50595	48.5849	143.495	1024.09	225.933	117.693	501.366	2386.33	12.5268	14.3665	178.347	367.925	43.3949	6.49281	0.501476	-5.49547	1497.21	5397.9	649.31	11.0172	393.922	13.1681
7100603602	PSP	47.3209	-71.1149	B	78	6	16	835	A	Coniferous	Glacial without particular morphology	Medium	Moderately well drained	2	5	5east	5e	9.09845	45.3871	135.932	934.192	224.801	112.325	476.83	2338.81	12.134	13.7232	180.419	355.468	44.6815	5.85917	-0.164778	-6.18236	1463.71	5500.82	654.845	10.8396	391.289	12.6478
7100603602	PSP	47.3209	-71.1149	C	69	21	10	835	A	Coniferous	Glacial without particular morphology	Medium	Moderately well drained	2	5	5east	5e	9.09845	45.3871	135.932	934.192	224.801	112.325	476.83	2338.81	12.134	13.7232	180.419	355.468	44.6815	5.85917	-0.164778	-6.18236	1463.71	5500.82	654.845	10.8396	391.289	12.6478
7100603701	PSP	47.3161	-71.1496	B	68	26	6	670	C	Coniferous	Proglacial	Thick	Poorly drained	7	5	5east	5e	9.46429	47.6721	143.179	1028.49	225.533	117.196	501.37	2379.82	12.5846	14.4319	178.856	367.95	43.5083	6.54199	0.520861	-5.49571	1503.46	5403.17	654.673	11.0847	395.286	13.3128
7100603701	PSP	47.3161	-71.1496	C	94	2	4	670	C	Coniferous	Proglacial	Thick	Poorly drained	7	5	5east	5e	9.46429	47.6721	143.179	1028.49	225.533	117.196	501.37	2379.82	12.5846	14.4319	178.856	367.95	43.5083	6.54199	0.520861	-5.49571	1503.46	5403.17	654.673	11.0847	395.286	13.3128
7100603702	PSP	47.3176	-71.155	B	76	19	5	674	C	Coniferous	Glacial without particular morphology	Medium	Somewhat poorly drained	2	5	5east	5e	9.38966	47.3954	141.704	1015.26	225.286	116.545	497.439	2381.32	12.5388	14.3697	178.888	365.783	43.7548	6.4624	0.435623	-5.58247	1502.71	5415.76	657.519	11.0988	394.666	13.2265
7100603702	PSP	47.3176	-71.155	C	78	14	8	674	C	Coniferous	Glacial without particular morphology	Medium	Somewhat poorly drained	2	5	5east	5e	9.38966	47.3954	141.704	1015.26	225.286	116.545	497.439	2381.32	12.5388	14.3697	178.888	365.783	43.7548	6.4624	0.435623	-5.58247	1502.71	5415.76	657.519	11.0988	394.666	13.2265
7100603801	PSP	47.3497	-70.5499	B	68	31	1	241	D	Mixed	Glacial without particular morphology	Medium	Moderately well drained	2	4	4east	4d	51.6877	129.617	185.729	1496.71	266.283	172.919	544.608	2965.07	13.4067	17.6238	137.639	429.295	33.1711	8.78437	3.68424	-1.39604	1074.47	4823.56	354.554	10.8098	288.475	13.7483
7100603801	PSP	47.3497	-70.5499	C	74	23	3	241	D	Mixed	Glacial without particular morphology	Medium	Moderately well drained	2	4	4east	4d	51.6877	129.617	185.729	1496.71	266.283	172.919	544.608	2965.07	13.4067	17.6238	137.639	429.295	33.1711	8.78437	3.68424	-1.39604	1074.47	4823.56	354.554	10.8098	288.475	13.7483
7100603802	PSP	47.349	-70.544	B	58	36	6	166	D	Mixed	Glacial without particular morphology	Thin to very thin	Moderately well drained	0	4	4east	4d	51.6877	129.617	185.729	1496.71	266.283	172.919	544.608	2965.07	13.4067	17.6238	137.639	429.295	33.1711	8.78437	3.68424	-1.39604	1074.47	4823.56	354.554	10.8098	288.475	13.7483
7100603802	PSP	47.349	-70.544	C	84	15	1	166	D	Mixed	Glacial without particular morphology	Thin to very thin	Moderately well drained	0	4	4east	4d	51.6877	129.617	185.729	1496.71	266.283	172.919	544.608	2965.07	13.4067	17.6238	137.639	429.295	33.1711	8.78437	3.68424	-1.39604	1074.47	4823.56	354.554	10.8098	288.475	13.7483
7100603901	PSP	47.3501	-70.8171	B	48	40	12	882	E	Coniferous	Glacial without particular morphology	Medium	Moderately well drained	2	5	5east	5e	11.3135	59.0942	138.333	916.24	232.281	114.956	463.086	2351.69	12.0044	13.5702	174.186	351.57	44.9039	5.34829	-0.294978	-5.96113	1366.17	5468.8	614.273	10.3182	372.582	11.7229
7100603902	PSP	47.3469	-70.8204	B	66	22	12	889	D	Coniferous	Glacial without particular morphology	Medium	Moderately well drained	2	5	5east	5e	11.3135	59.0942	138.333	916.24	232.281	114.956	463.086	2351.69	12.0044	13.5702	174.186	351.57	44.9039	5.34829	-0.294978	-5.96113	1366.17	5468.8	614.273	10.3182	372.582	11.7229
7100604001	PSP	47.3665	-70.7841	B	74	16	10	716	E	Mixed	Glacial without particular morphology	Medium	Moderately well drained	5	5	5east	5e	14.3453	81.8614	150.819	1066.02	243.697	129.42	505.98	2527.86	12.5294	14.6702	162.836	368.648	42.5177	6.08565	0.638283	-4.82981	1334.7	5315.9	567.987	10.5489	363.641	12.2186
7100604001	PSP	47.3665	-70.7841	C	62	27	11	716	E	Mixed	Glacial without particular morphology	Medium	Moderately well drained	5	5	5east	5e	14.3453	81.8614	150.819	1066.02	243.697	129.42	505.98	2527.86	12.5294	14.6702	162.836	368.648	42.5177	6.08565	0.638283	-4.82981	1334.7	5315.9	567.987	10.5489	363.641	12.2186
7100604002	PSP	47.3633	-70.7876	B	68	23	9	735	E	Mixed	Glacial without particular morphology	Medium	Moderately well drained	2	5	5east	5e	14.3453	81.8614	150.819	1066.02	243.697	129.42	505.98	2527.86	12.5294	14.6702	162.836	368.648	42.5177	6.08565	0.638283	-4.82981	1334.7	5315.9	567.987	10.5489	363.641	12.2186
7100604101	PSP	47.3832	-70.8834	B	70	18	12	991	C	Coniferous	Glacial without particular morphology	Medium	Somewhat poorly drained	5	5	5east	5e	10.6825	50.0268	131.548	861.424	227.556	106.33	428.926	2222.05	11.8621	13.1903	178.523	345.046	45.3626	5.13906	-0.732497	-6.59389	1351.71	5533.26	614.029	10.4901	371.404	11.8737
7100604102	PSP	47.3865	-70.8798	B	66	22	12	937	D	Coniferous	Glacial without particular morphology	Medium	Somewhat poorly drained	5	5	5east	5e	10.5692	51.8261	133.12	878.466	228.746	108.56	441.343	2261.38	11.9287	13.3357	177.926	346.993	45.4313	5.23121	-0.601909	-6.50349	1373.96	5525.82	624.712	10.5259	375.33	11.9269
7100604102	PSP	47.3865	-70.8798	C	62	22	16	937	D	Coniferous	Glacial without particular morphology	Medium	Somewhat poorly drained	5	5	5east	5e	10.5692	51.8261	133.12	878.466	228.746	108.56	441.343	2261.38	11.9287	13.3357	177.926	346.993	45.4313	5.23121	-0.601909	-6.50349	1373.96	5525.82	624.712	10.5259	375.33	11.9269
7100604201	PSP	47.4327	-70.6154	B	69	29	2	459	C	Mixed	Glacial without particular morphology	Medium	Moderately well drained	2	4	4east	4d	27.8813	103.266	166.66	1295.4	254.743	152.86	531.101	2781.93	13.054	16.4858	152.48	399.043	36.5912	7.4402	1.95314	-3.6084	1161.6	5040.88	424.914	11.153	323.263	13.4959
7100604201	PSP	47.4327	-70.6154	C	69	29	2	459	C	Mixed	Glacial without particular morphology	Medium	Moderately well drained	2	4	4east	4d	27.8813	103.266	166.66	1295.4	254.743	152.86	531.101	2781.93	13.054	16.4858	152.48	399.043	36.5912	7.4402	1.95314	-3.6084	1161.6	5040.88	424.914	11.153	323.263	13.4959
7100604202	PSP	47.43	-70.6115	B	80	19	1	416	C	Coniferous	Glacial without particular morphology	Thick	Moderately well drained	2	4	4east	4d	27.8813	103.266	166.66	1295.4	254.743	152.86	531.101	2781.93	13.054	16.4858	152.48	399.043	36.5912	7.4402	1.95314	-3.6084	1161.6	5040.88	424.914	11.153	323.263	13.4959
7100604202	PSP	47.43	-70.6115	C	72	21	7	416	C	Coniferous	Glacial without particular morphology	Thick	Moderately well drained	2	4	4east	4d	27.8813	103.266	166.66	1295.4	254.743	152.86	531.101	2781.93	13.054	16.4858	152.48	399.043	36.5912	7.4402	1.95314	-3.6084	1161.6	5040.88	424.914	11.153	323.263	13.4959
7100604301	PSP	47.4331	-70.6498	B	67	29	4	551	C	Mixed	Glacial without particular morphology	Thick	Moderately well drained	2	5	5east	5e	24.7191	98.5513	161.414	1217.88	252.706	147.399	513.424	2721.81	12.814	15.8848	155.154	387.41	38.1896	6.88099	1.46703	-3.93235	1157.3	5099.58	442.394	10.8359	327.016	12.9188
7100604301	PSP	47.4331	-70.6498	C	65	26	9	551	C	Mixed	Glacial without particular morphology	Thick	Moderately well drained	2	5	5east	5e	24.7191	98.5513	161.414	1217.88	252.706	147.399	513.424	2721.81	12.814	15.8848	155.154	387.41	38.1896	6.88099	1.46703	-3.93235	1157.3	5099.58	442.394	10.8359	327.016	12.9188
7100604302	PSP	47.4346	-70.6444	B	70	24	6	564	D	Mixed	Glacial without particular morphology	Medium	Moderately well drained	2	4	4east	4d	25.7759	100.152	162.963	1240.04	253.537	147.86	518.284	2721.52	12.923	16.0355	154.387	390.524	37.9332	7.02706	1.6089	-3.79111	1165.92	5085.64	444.597	10.8697	329.346	13.0437
7100604302	PSP	47.4346	-70.6444	C	83	13	4	564	D	Mixed	Glacial without particular morphology	Medium	Moderately well drained	2	4	4east	4d	25.7759	100.152	162.963	1240.04	253.537	147.86	518.284	2721.52	12.923	16.0355	154.387	390.524	37.9332	7.02706	1.6089	-3.79111	1165.92	5085.64	444.597	10.8697	329.346	13.0437
7100604401	PSP	47.4667	-70.6994	B	89	11	0	879	D	Mixed	Glacial without particular morphology	Medium	Moderately well drained	2	5	5east	5e	13.449	71.1134	140.589	938.738	237.965	119.216	460.883	2414.44	12.0568	13.8716	167.853	352.929	44.6523	5.2741	-0.261464	-5.77688	1302.77	5428.81	582.996	10.3085	359.396	11.6764
7100604401	PSP	47.4667	-70.6994	C	86	14	0	879	D	Mixed	Glacial without particular morphology	Medium	Moderately well drained	2	5	5east	5e	13.449	71.1134	140.589	938.738	237.965	119.216	460.883	2414.44	12.0568	13.8716	167.853	352.929	44.6523	5.2741	-0.261464	-5.77688	1302.77	5428.81	582.996	10.3085	359.396	11.6764
7100604402	PSP	47.4637	-70.6957	B	86	12	2	889	B	Mixed	Glacial without particular morphology	Medium	Moderately well drained	2	5	5east	5e	13.449	71.1134	140.589	938.738	237.965	119.216	460.883	2414.44	12.0568	13.8716	167.853	352.929	44.6523	5.2741	-0.261464	-5.77688	1302.77	5428.81	582.996	10.3085	359.396	11.6764
7100604402	PSP	47.4637	-70.6957	C	84	15	1	889	B	Mixed	Glacial without particular morphology	Medium	Moderately well drained	2	5	5east	5e	13.449	71.1134	140.589	938.738	237.965	119.216	460.883	2414.44	12.0568	13.8716	167.853	352.929	44.6523	5.2741	-0.261464	-5.77688	1302.77	5428.81	582.996	10.3085	359.396	11.6764
7100604501	PSP	47.4666	-70.7836	B	68	19	13	785	C	Coniferous	Glacial without particular morphology	Thick	Moderately well drained	1	5	5east	5e	13.0289	63.0156	141.304	961.354	233.871	117.698	460.972	2362.11	12.233	13.9726	171.852	356.797	43.5793	5.6617	-0.0241326	-5.70322	1319.8	5389.3	576.582	10.5405	363.211	12.1321
7100604501	PSP	47.4666	-70.7836	C	69	23	8	785	C	Coniferous	Glacial without particular morphology	Thick	Moderately well drained	1	5	5east	5e	13.0289	63.0156	141.304	961.354	233.871	117.698	460.972	2362.11	12.233	13.9726	171.852	356.797	43.5793	5.6617	-0.0241326	-5.70322	1319.8	5389.3	576.582	10.5405	363.211	12.1321
7100604502	PSP	47.4636	-70.7801	B	62	26	12	806	D	Mixed	Glacial without particular morphology	Thick	Moderately well drained	1	5	5east	5e	13.0289	63.0156	141.304	961.354	233.871	117.698	460.972	2362.11	12.233	13.9726	171.852	356.797	43.5793	5.6617	-0.0241326	-5.70322	1319.8	5389.3	576.582	10.5405	363.211	12.1321
7100604502	PSP	47.4636	-70.7801	C	66	23	11	806	D	Mixed	Glacial without particular morphology	Thick	Moderately well drained	1	5	5east	5e	13.0289	63.0156	141.304	961.354	233.871	117.698	460.972	2362.11	12.233	13.9726	171.852	356.797	43.5793	5.6617	-0.0241326	-5.70322	1319.8	5389.3	576.582	10.5405	363.211	12.1321
7100604601	PSP	47.4827	-70.6491	B	90	9	1	425	F	Mixed	Glacial without particular morphology	Thick	Well drained	2	4	4east	4d	28.7485	103.345	165.437	1293.92	254.427	150.655	516.253	2748.91	13.1521	16.5077	152.079	397.792	36.9726	7.38299	1.85066	-3.61822	1132.92	5045.2	418.498	11.1586	319.77	13.5307
7100604601	PSP	47.4827	-70.6491	C	86	13	1	425	F	Mixed	Glacial without particular morphology	Thick	Well drained	2	4	4east	4d	28.7485	103.345	165.437	1293.92	254.427	150.655	516.253	2748.91	13.1521	16.5077	152.079	397.792	36.9726	7.38299	1.85066	-3.61822	1132.92	5045.2	418.498	11.1586	319.77	13.5307
7100604602	PSP	47.4796	-70.6456	B	79	19	2	459	C	Mixed	Glacial without particular morphology	Thick	Moderately well drained	2	4	4east	4d	28.7485	103.345	165.437	1293.92	254.427	150.655	516.253	2748.91	13.1521	16.5077	152.079	397.792	36.9726	7.38299	1.85066	-3.61822	1132.92	5045.2	418.498	11.1586	319.77	13.5307
7100604602	PSP	47.4796	-70.6456	C	88	11	1	459	C	Mixed	Glacial without particular morphology	Thick	Moderately well drained	2	4	4east	4d	28.7485	103.345	165.437	1293.92	254.427	150.655	516.253	2748.91	13.1521	16.5077	152.079	397.792	36.9726	7.38299	1.85066	-3.61822	1132.92	5045.2	418.498	11.1586	319.77	13.5307
7100604701	PSP	47.5007	-70.7831	B	68	20	12	959	F	Coniferous	Glacial without particular morphology	Thin to very thin	Well drained	1	5	5east	5e	11.8735	57.5458	134.363	875.957	231.165	111.459	440.622	2294.76	11.8485	13.3663	174.622	345.88	45.3164	4.99393	-0.690045	-6.37284	1321.69	5485.38	601.526	10.2888	366.89	11.6003
7100604701	PSP	47.5007	-70.7831	C	82	10	8	959	F	Coniferous	Glacial without particular morphology	Thin to very thin	Well drained	1	5	5east	5e	11.8735	57.5458	134.363	875.957	231.165	111.459	440.622	2294.76	11.8485	13.3663	174.622	345.88	45.3164	4.99393	-0.690045	-6.37284	1321.69	5485.38	601.526	10.2888	366.89	11.6003
7100604702	PSP	47.5023	-70.7776	B	70	20	10	944	C	Coniferous	Glacial without particular morphology	Medium	Moderately well drained	1	5	5east	5e	11.8735	57.5458	134.363	875.957	231.165	111.459	440.622	2294.76	11.8485	13.3663	174.622	345.88	45.3164	4.99393	-0.690045	-6.37284	1321.69	5485.38	601.526	10.2888	366.89	11.6003
7100604702	PSP	47.5023	-70.7776	C	58	31	11	944	C	Coniferous	Glacial without particular morphology	Medium	Moderately well drained	1	5	5east	5e	11.8735	57.5458	134.363	875.957	231.165	111.459	440.622	2294.76	11.8485	13.3663	174.622	345.88	45.3164	4.99393	-0.690045	-6.37284	1321.69	5485.38	601.526	10.2888	366.89	11.6003
7100604801	PSP	47.5165	-70.3337	B	65	35	0	456	B	Coniferous	Glacial without particular morphology	Medium	Moderately well drained	2	4	4east	4d	43.2606	124.621	176.798	1377.51	264.123	161.888	479.022	2793.33	13.2027	17.0094	140.504	409.408	34.3842	7.45765	2.64078	-2.12487	954.874	4820.3	329.606	10.014	280.036	12.3538
7100604801	PSP	47.5165	-70.3337	C	79	19	2	456	B	Coniferous	Glacial without particular morphology	Medium	Moderately well drained	2	4	4east	4d	43.2606	124.621	176.798	1377.51	264.123	161.888	479.022	2793.33	13.2027	17.0094	140.504	409.408	34.3842	7.45765	2.64078	-2.12487	954.874	4820.3	329.606	10.014	280.036	12.3538
7100604802	PSP	47.5141	-70.3371	B	60	34	6	383	E	Coniferous	Glacial without particular morphology	Medium	Well drained	2	4	4east	4d	39.9308	124.43	176.958	1383.44	264.011	163.284	494.164	2818.65	13.167	17.0939	140.581	409.543	33.9372	7.32612	2.56413	-2.09589	963.783	4802.19	327.396	9.97375	284.416	12.2534
7100604901	PSP	47.5508	-70.6503	B	77	21	2	610	D	Mixed	Glacial without particular morphology	Medium	Moderately well drained	2	5	5east	5e	33.4873	107.993	164.874	1284.38	256.749	148.584	467.182	2686.02	13.1873	16.4184	149.752	394.873	36.5282	7.04679	1.7342	-3.57148	1010.7	5000.74	373.123	10.9561	301.41	13.1526
7100604901	PSP	47.5508	-70.6503	C	83	16	1	610	D	Mixed	Glacial without particular morphology	Medium	Moderately well drained	2	5	5east	5e	33.4873	107.993	164.874	1284.38	256.749	148.584	467.182	2686.02	13.1873	16.4184	149.752	394.873	36.5282	7.04679	1.7342	-3.57148	1010.7	5000.74	373.123	10.9561	301.41	13.1526
7100604902	PSP	47.548	-70.6465	B	81	18	1	569	D	Mixed	Glacial without particular morphology	Medium	Moderately well drained	2	5	5east	5e	30.9911	106.673	163.572	1260.19	256.511	147.249	467.488	2670.76	13.1188	16.2875	150.85	390.943	36.9478	6.86898	1.56768	-3.75548	1013.46	5018.47	373.554	10.8603	299.28	12.963
7100604902	PSP	47.548	-70.6465	C	76	21	3	569	D	Mixed	Glacial without particular morphology	Medium	Moderately well drained	2	5	5east	5e	30.9911	106.673	163.572	1260.19	256.511	147.249	467.488	2670.76	13.1188	16.2875	150.85	390.943	36.9478	6.86898	1.56768	-3.75548	1013.46	5018.47	373.554	10.8603	299.28	12.963
7100605001	PSP	47.5657	-70.6664	B	89	11	0	504	D	Mixed	Glacial without particular morphology	Medium	Moderately well drained	1	5	5east	5e	35.4216	110.385	166.962	1318.33	257.707	150.689	470.337	2702.43	13.3284	16.6606	148.317	398.34	36.3504	7.16902	1.88744	-3.45991	1002.63	4973.72	363.538	11.0322	294.809	13.2904
7100605001	PSP	47.5657	-70.6664	C	91	9	0	504	D	Mixed	Glacial without particular morphology	Medium	Moderately well drained	1	5	5east	5e	35.4216	110.385	166.962	1318.33	257.707	150.689	470.337	2702.43	13.3284	16.6606	148.317	398.34	36.3504	7.16902	1.88744	-3.45991	1002.63	4973.72	363.538	11.0322	294.809	13.2904
7100605002	PSP	47.5689	-70.67	B	84	14	2	534	D	Deciduous	Glacial without particular morphology	Medium	Moderately well drained	2	5	5east	5e	26.8437	96.2427	157.161	1172.91	250.632	139.211	469.025	2592.36	12.8703	15.6442	155.387	380.465	39.5129	6.45939	1.04725	-4.32112	1100.58	5131.3	442.623	10.7188	322.097	12.6935
7100605002	PSP	47.5689	-70.67	C	94	6	0	534	D	Deciduous	Glacial without particular morphology	Medium	Moderately well drained	2	5	5east	5e	26.8437	96.2427	157.161	1172.91	250.632	139.211	469.025	2592.36	12.8703	15.6442	155.387	380.465	39.5129	6.45939	1.04725	-4.32112	1100.58	5131.3	442.623	10.7188	322.097	12.6935
7100605102	PSP	47.5789	-70.4333	B	58	32	10	361	A	Coniferous	Glacial without particular morphology	Thick	Somewhat poorly drained	5	4	4east	4d	45.0288	128.324	177.772	1457.21	266.265	162.335	467.15	2778.24	13.6637	17.6529	138.953	414.2	33.3093	7.45143	2.71852	-2.04357	901.534	4781.31	301.15	10.2744	275.92	12.719
7100605102	PSP	47.5789	-70.4333	C	68	24	8	361	A	Coniferous	Glacial without particular morphology	Thick	Somewhat poorly drained	5	4	4east	4d	45.0288	128.324	177.772	1457.21	266.265	162.335	467.15	2778.24	13.6637	17.6529	138.953	414.2	33.3093	7.45143	2.71852	-2.04357	901.534	4781.31	301.15	10.2744	275.92	12.719
7100605201	PSP	47.583	-70.4832	B	56	41	3	301	A	Coniferous	Proglacial	Thick	Moderately well drained	2	4	4east	4d	45.5508	119.239	176.045	1444.8	261.088	162.246	466.306	2810.61	13.5593	17.5079	142.845	416.185	32.7901	7.82002	2.72145	-2.35183	898.133	4801.08	294.588	10.9896	275.613	13.6574
7100605201	PSP	47.583	-70.4832	B	61	39	0	301	A	Coniferous	Proglacial	Thick	Moderately well drained	2	4	4east	4d	45.5508	119.239	176.045	1444.8	261.088	162.246	466.306	2810.61	13.5593	17.5079	142.845	416.185	32.7901	7.82002	2.72145	-2.35183	898.133	4801.08	294.588	10.9896	275.613	13.6574
7100605201	PSP	47.583	-70.4832	C	80	19	1	301	A	Coniferous	Proglacial	Thick	Moderately well drained	2	4	4east	4d	45.5508	119.239	176.045	1444.8	261.088	162.246	466.306	2810.61	13.5593	17.5079	142.845	416.185	32.7901	7.82002	2.72145	-2.35183	898.133	4801.08	294.588	10.9896	275.613	13.6574
7100605201	PSP	47.583	-70.4832	C	82	16	2	301	A	Coniferous	Proglacial	Thick	Moderately well drained	2	4	4east	4d	45.5508	119.239	176.045	1444.8	261.088	162.246	466.306	2810.61	13.5593	17.5079	142.845	416.185	32.7901	7.82002	2.72145	-2.35183	898.133	4801.08	294.588	10.9896	275.613	13.6574
7100605202	PSP	47.5791	-70.4839	B	57	40	3	304	A	Coniferous	Proglacial	Thick	Moderately well drained	2	4	4east	4d	44.9445	118.834	175.921	1437.9	260.836	161.815	467.803	2804.83	13.5418	17.4578	142.999	415.406	33.0193	7.78272	2.69762	-2.44115	906.138	4806.33	300.215	11.0219	277.062	13.6604
7100605202	PSP	47.5791	-70.4839	B	73	27	0	304	A	Coniferous	Proglacial	Thick	Moderately well drained	2	4	4east	4d	44.9445	118.834	175.921	1437.9	260.836	161.815	467.803	2804.83	13.5418	17.4578	142.999	415.406	33.0193	7.78272	2.69762	-2.44115	906.138	4806.33	300.215	11.0219	277.062	13.6604
7100605202	PSP	47.5791	-70.4839	C	72	24	4	304	A	Coniferous	Proglacial	Thick	Moderately well drained	2	4	4east	4d	44.9445	118.834	175.921	1437.9	260.836	161.815	467.803	2804.83	13.5418	17.4578	142.999	415.406	33.0193	7.78272	2.69762	-2.44115	906.138	4806.33	300.215	11.0219	277.062	13.6604
7100605202	PSP	47.5791	-70.4839	C	73	24	3	304	A	Coniferous	Proglacial	Thick	Moderately well drained	2	4	4east	4d	44.9445	118.834	175.921	1437.9	260.836	161.815	467.803	2804.83	13.5418	17.4578	142.999	415.406	33.0193	7.78272	2.69762	-2.44115	906.138	4806.33	300.215	11.0219	277.062	13.6604
7100605301	PSP	47.5995	-70.5835	B	81	18	1	267	D	Deciduous	Glacial without particular morphology	Thick	Moderately well drained	2	4	4east	4d	47.4395	115.864	175.873	1466.35	259.181	160.555	466.68	2796.44	13.7483	17.6018	144.307	420.152	32.8115	8.22901	2.86996	-2.48715	921.472	4823.6	301.823	11.616	277.083	14.4623
7100605301	PSP	47.5995	-70.5835	C	80	19	1	267	D	Deciduous	Glacial without particular morphology	Thick	Moderately well drained	2	4	4east	4d	47.4395	115.864	175.873	1466.35	259.181	160.555	466.68	2796.44	13.7483	17.6018	144.307	420.152	32.8115	8.22901	2.86996	-2.48715	921.472	4823.6	301.823	11.616	277.083	14.4623
7100605302	PSP	47.6005	-70.5888	B	86	13	1	342	F	Deciduous	Glacial without particular morphology	Medium	Well drained	2	4	4east	4d	46.6683	116.896	176.366	1449.47	259.559	159.931	464.356	2784.58	13.6985	17.5385	143.668	417.933	33.0522	8.01808	2.78862	-2.55221	921.735	4819.38	304.269	11.5681	276.855	14.3435
7100605302	PSP	47.6005	-70.5888	C	90	10	0	342	F	Deciduous	Glacial without particular morphology	Medium	Well drained	2	4	4east	4d	46.6683	116.896	176.366	1449.47	259.559	159.931	464.356	2784.58	13.6985	17.5385	143.668	417.933	33.0522	8.01808	2.78862	-2.55221	921.735	4819.38	304.269	11.5681	276.855	14.3435
7100605401	PSP	47.6336	-70.1661	B	68	31	1	254	C	Mixed	Glacial without particular morphology	Medium	Moderately well drained	2	4	4east	4d	42.8337	123.522	178.976	1349.25	263.339	164.28	473.802	2800.17	12.9118	16.7805	140.819	408.415	33.45	7.31583	2.64838	-2.02564	927.488	4730.82	310.328	9.6738	269.552	12.0358
7100605401	PSP	47.6336	-70.1661	C	65	26	9	254	C	Mixed	Glacial without particular morphology	Medium	Moderately well drained	2	4	4east	4d	42.8337	123.522	178.976	1349.25	263.339	164.28	473.802	2800.17	12.9118	16.7805	140.819	408.415	33.45	7.31583	2.64838	-2.02564	927.488	4730.82	310.328	9.6738	269.552	12.0358
7100605401	PSP	47.6336	-70.1661	C	73	22	5	254	C	Mixed	Glacial without particular morphology	Medium	Moderately well drained	2	4	4east	4d	42.8337	123.522	178.976	1349.25	263.339	164.28	473.802	2800.17	12.9118	16.7805	140.819	408.415	33.45	7.31583	2.64838	-2.02564	927.488	4730.82	310.328	9.6738	269.552	12.0358
7100605402	PSP	47.6307	-70.1625	B	68	31	1	225	E	Deciduous	Glacial without particular morphology	Medium	Moderately well drained	2	4	4east	4d	42.8337	123.522	178.976	1349.25	263.339	164.28	473.802	2800.17	12.9118	16.7805	140.819	408.415	33.45	7.31583	2.64838	-2.02564	927.488	4730.82	310.328	9.6738	269.552	12.0358
7100605402	PSP	47.6307	-70.1625	C	81	17	2	225	E	Deciduous	Glacial without particular morphology	Medium	Moderately well drained	2	4	4east	4d	42.8337	123.522	178.976	1349.25	263.339	164.28	473.802	2800.17	12.9118	16.7805	140.819	408.415	33.45	7.31583	2.64838	-2.02564	927.488	4730.82	310.328	9.6738	269.552	12.0358
7100605402	PSP	47.6307	-70.1625	C	89	8	3	225	E	Deciduous	Glacial without particular morphology	Medium	Moderately well drained	2	4	4east	4d	42.8337	123.522	178.976	1349.25	263.339	164.28	473.802	2800.17	12.9118	16.7805	140.819	408.415	33.45	7.31583	2.64838	-2.02564	927.488	4730.82	310.328	9.6738	269.552	12.0358
7100605501	PSP	47.6679	-70.5666	B	78	17	5	473	C	Deciduous	Glacial without particular morphology	Medium	Moderately well drained	2	4	4east	4d	35.4116	108.466	164.391	1295.51	256.198	147.825	450.632	2664	13.3128	16.5799	148.732	395.254	36.641	6.99901	1.66539	-3.6874	972.881	4990.79	358.433	11.2253	290.889	13.5228
7100605502	PSP	47.671	-70.5632	B	80	17	3	488	A	Mixed	Glacial without particular morphology	Thick	Moderately well drained	2	4	4east	4d	35.4116	108.466	164.391	1295.51	256.198	147.825	450.632	2664	13.3128	16.5799	148.732	395.254	36.641	6.99901	1.66539	-3.6874	972.881	4990.79	358.433	11.2253	290.889	13.5228
7100605502	PSP	47.671	-70.5632	C	90	6	4	488	A	Mixed	Glacial without particular morphology	Thick	Moderately well drained	2	4	4east	4d	35.4116	108.466	164.391	1295.51	256.198	147.825	450.632	2664	13.3128	16.5799	148.732	395.254	36.641	6.99901	1.66539	-3.6874	972.881	4990.79	358.433	11.2253	290.889	13.5228
7100605601	PSP	47.6837	-71.0843	B	64	26	10	908	C	Coniferous	Glacial without particular morphology	Medium	Somewhat poorly drained	1	5	5east	5e	9.52101	51.3036	132.892	872.396	229.231	103.938	430.83	2102.7	11.9691	13.3614	178.928	345.237	43.7061	5.00976	-0.867414	-6.74186	1330.91	5422.65	582.369	10.4613	380.552	11.9899
7100605601	PSP	47.6837	-71.0843	C	74	18	8	908	C	Coniferous	Glacial without particular morphology	Medium	Somewhat poorly drained	1	5	5east	5e	9.52101	51.3036	132.892	872.396	229.231	103.938	430.83	2102.7	11.9691	13.3614	178.928	345.237	43.7061	5.00976	-0.867414	-6.74186	1330.91	5422.65	582.369	10.4613	380.552	11.9899
7100605602	PSP	47.6865	-71.0877	B	84	7	9	876	C	Coniferous	Proglacial	Thick	Moderately well drained	1	5	5east	5e	9.8261	54.6429	136.09	906.991	230.861	107.441	444.512	2146.16	12.1052	13.5892	177.216	349.289	43.041	5.22514	-0.621082	-6.46529	1329.8	5374.74	573.137	10.5254	380.395	12.1251
7100605701	PSP	47.684	-71.1825	B	46	42	12	830	D	Coniferous	Glacial without particular morphology	Medium	Moderately well drained	1	5	5east	5e	10.4754	59.3339	140.284	964.809	233.305	112.282	464.031	2208.35	12.3741	14.011	174.968	355.926	41.8519	5.58195	-0.252531	-6.06325	1326.83	5317.12	556.228	10.6903	380.636	12.4434
7100605701	PSP	47.684	-71.1825	C	54	36	10	830	D	Coniferous	Glacial without particular morphology	Medium	Moderately well drained	1	5	5east	5e	10.4754	59.3339	140.284	964.809	233.305	112.282	464.031	2208.35	12.3741	14.011	174.968	355.926	41.8519	5.58195	-0.252531	-6.06325	1326.83	5317.12	556.228	10.6903	380.636	12.4434
7100605702	PSP	47.6871	-71.1856	B	88	4	8	796	A	Coniferous	Proglacial	Thick	Moderately well drained	2	5	5east	5e	10.5715	60.0013	140.831	971.644	233.682	112.91	465.649	2215.83	12.3962	14.0648	174.68	356.687	41.7092	5.62446	-0.204997	-6.01862	1325.18	5310.12	553.653	10.7196	380.36	12.4845
7100605702	PSP	47.6871	-71.1856	C	88	6	6	796	A	Coniferous	Proglacial	Thick	Moderately well drained	2	5	5east	5e	10.5715	60.0013	140.831	971.644	233.682	112.91	465.649	2215.83	12.3962	14.0648	174.68	356.687	41.7092	5.62446	-0.204997	-6.01862	1325.18	5310.12	553.653	10.7196	380.36	12.4845
7100605801	PSP	47.7003	-70.4837	B	96	4	0	272	D	Coniferous	Proglacial	Thick	Well drained	1	4	4east	4d	47.1658	112.552	173.24	1445.16	257.712	158.545	448.595	2785.21	13.7081	17.5126	146.158	417.885	32.263	8.10906	2.61981	-2.85762	871.865	4829.93	280.75	11.9536	272.893	14.7978
7100605801	PSP	47.7003	-70.4837	C	95	4	1	272	D	Coniferous	Proglacial	Thick	Well drained	1	4	4east	4d	47.1658	112.552	173.24	1445.16	257.712	158.545	448.595	2785.21	13.7081	17.5126	146.158	417.885	32.263	8.10906	2.61981	-2.85762	871.865	4829.93	280.75	11.9536	272.893	14.7978
7100605802	PSP	47.7036	-70.4869	B	94	5	1	294	A	Coniferous	Proglacial	Thick	Well drained	1	4	4east	4d	45.1547	112.489	172.154	1415.15	258.022	158.469	451.48	2780.64	13.5487	17.3195	146.531	412.914	33.3118	7.82747	2.46738	-3.00804	890.167	4844.4	296.801	11.8011	274.04	14.5049
7100605802	PSP	47.7036	-70.4869	C	98	1	1	294	A	Coniferous	Proglacial	Thick	Well drained	1	4	4east	4d	45.1547	112.489	172.154	1415.15	258.022	158.469	451.48	2780.64	13.5487	17.3195	146.531	412.914	33.3118	7.82747	2.46738	-3.00804	890.167	4844.4	296.801	11.8011	274.04	14.5049
7100605901	PSP	47.8157	-70.083	B	67	23	10	613	E	Mixed	Glacial without particular morphology	Medium	Moderately well drained	1	5	5east	5e	32.8502	111.804	162.262	1170.71	258.424	148.112	444.683	2680.71	12.5599	15.7147	147.623	378.301	41.479	5.70853	1.03453	-3.64627	1014.25	4993.99	421.51	9.45443	282.824	11.1594
7100605901	PSP	47.8157	-70.083	C	70	21	9	613	E	Mixed	Glacial without particular morphology	Medium	Moderately well drained	1	5	5east	5e	32.8502	111.804	162.262	1170.71	258.424	148.112	444.683	2680.71	12.5599	15.7147	147.623	378.301	41.479	5.70853	1.03453	-3.64627	1014.25	4993.99	421.51	9.45443	282.824	11.1594
7100605902	PSP	47.8168	-70.0884	B	74	16	10	631	D	Deciduous	Glacial without particular morphology	Medium	Moderately well drained	1	5	5east	5e	31.6558	109.076	159.886	1142.01	257.318	145.673	439.897	2659.93	12.4783	15.5771	149.245	374.393	41.9002	5.54046	0.798605	-3.8638	1012.01	5030.8	424.636	9.36718	284.452	11.1031
7100606002	PSP	47.8532	-70.3039	B	80	16	4	601	C	Coniferous	Glacial characterized by its morphology	Thick	Moderately well drained	2	5	5east	5e	33.4677	105.056	159.617	1179.66	255.46	144.712	430.15	2621.95	12.751	15.8266	151.411	379.048	40.2477	5.82066	0.91683	-3.93369	972.928	4988.69	392.695	9.87153	280.78	11.8498
7100606101	PSP	47.8645	-70.1515	B	70	22	8	503	E	Mixed	Glacial without particular morphology	Medium	Well drained	1	5	5east	5e	36.6645	111.183	163.499	1247.99	257.272	148.428	440.301	2678.18	13.0247	16.2847	147.09	388.332	39.8879	6.33215	1.35439	-3.68813	994.164	4974.13	397.156	10.5425	279.21	12.5892
7100606101	PSP	47.8645	-70.1515	C	72	20	8	503	E	Mixed	Glacial without particular morphology	Medium	Well drained	1	5	5east	5e	36.6645	111.183	163.499	1247.99	257.272	148.428	440.301	2678.18	13.0247	16.2847	147.09	388.332	39.8879	6.33215	1.35439	-3.68813	994.164	4974.13	397.156	10.5425	279.21	12.5892
7100606102	PSP	47.8633	-70.157	B	73	18	9	570	F	Mixed	Glacial without particular morphology	Medium	Well drained	2	5	5east	5e	36.6645	111.183	163.499	1247.99	257.272	148.428	440.301	2678.18	13.0247	16.2847	147.09	388.332	39.8879	6.33215	1.35439	-3.68813	994.164	4974.13	397.156	10.5425	279.21	12.5892
7100606201	PSP	47.9164	-70.1156	B	84	9	7	359	E	Coniferous	Juxtaglacial	Thick	Moderately well drained	1	5	5east	5e	40.0059	114.154	167.371	1316.07	258.69	154.913	448.937	2746.84	13.1585	16.7888	145.541	398.376	38.466	6.85688	1.78624	-3.29944	971.588	4898.73	374.229	10.8749	274.482	13.3249
7100606201	PSP	47.9164	-70.1156	C	79	19	2	359	E	Coniferous	Juxtaglacial	Thick	Moderately well drained	1	5	5east	5e	40.0059	114.154	167.371	1316.07	258.69	154.913	448.937	2746.84	13.1585	16.7888	145.541	398.376	38.466	6.85688	1.78624	-3.29944	971.588	4898.73	374.229	10.8749	274.482	13.3249
7100606202	PSP	47.918	-70.1105	B	57	29	14	379	C	Coniferous	Glacial without particular morphology	Thick	Moderately well drained	2	5	5east	5e	41.8936	116.623	169.536	1340.68	259.574	157.894	462.275	2784.88	13.1808	16.9608	143.953	403.196	37.3447	7.16125	2.03733	-3.15636	970.006	4873.97	362.873	11.1765	278.508	13.7647
7100606202	PSP	47.918	-70.1105	C	59	38	3	379	C	Coniferous	Glacial without particular morphology	Thick	Moderately well drained	2	5	5east	5e	41.8936	116.623	169.536	1340.68	259.574	157.894	462.275	2784.88	13.1808	16.9608	143.953	403.196	37.3447	7.16125	2.03733	-3.15636	970.006	4873.97	362.873	11.1765	278.508	13.7647
7100606301	PSP	47.9503	-70.0829	B	75	22	3	314	B	Mixed	Glacial without particular morphology	Medium	Moderately well drained	1	5	5east	5e	42.1323	110.729	163.729	1325.1	255.864	150.206	447.335	2720.01	13.4384	16.9312	146.125	401.508	38.166	7.33278	1.77645	-3.76581	989.035	4976.22	377.254	12.1852	281.589	14.8818
7100606302	PSP	47.9517	-70.0884	B	74	19	7	366	C	Deciduous	Glacial without particular morphology	Medium	Moderately well drained	1	5	5east	5e	38.9852	108.758	158.936	1266.61	255.285	145.043	438.011	2657.35	13.3023	16.5477	147.515	392.857	39.2374	7.06268	1.40281	-4.04813	1018.46	5049.96	398.424	12.2086	287.909	14.5979
7100606302	PSP	47.9517	-70.0884	C	74	20	6	366	C	Deciduous	Glacial without particular morphology	Medium	Moderately well drained	1	5	5east	5e	38.9852	108.758	158.936	1266.61	255.285	145.043	438.011	2657.35	13.3023	16.5477	147.515	392.857	39.2374	7.06268	1.40281	-4.04813	1018.46	5049.96	398.424	12.2086	287.909	14.5979
7100606401	PSP	48.017	-70.2827	B	62	22	16	747	F	Coniferous	Glacial without particular morphology	Medium	Moderately well drained	1	5	5east	5e	28.6862	92.0466	151.514	1117.22	249.23	140.135	430.678	2579.43	12.5289	15.5236	158.196	370.812	41.4196	5.52404	0.336622	-4.94597	1000.59	5078.13	415.309	10.9265	288.07	12.8258
7100606501	PSP	48.0167	-71.1005	B	64	21	15	800	D	Coniferous	Glacial without particular morphology	Medium	Moderately well drained	2	5	5east	5e	9.99275	47.6718	136.718	952.358	226.91	112.77	448.616	2178.48	12.2334	14.1046	180.234	354.595	39.6255	5.47838	-0.476311	-6.44324	1197.64	5251.78	476.105	11.2187	368.597	13.0217
7100606502	PSP	48.0206	-71.1001	B	60	26	14	784	B	Coniferous	Glacial without particular morphology	Medium	Moderately well drained	2	5	5east	5e	10.1233	49.1857	138.07	966.977	227.715	114.733	459	2206.87	12.2786	14.2188	179.525	355.621	39.6177	5.51774	-0.392185	-6.378	1206.73	5238.37	478.996	11.2668	369.831	13.0845
7100606502	PSP	48.0206	-71.1001	C	61	26	13	784	B	Coniferous	Glacial without particular morphology	Medium	Moderately well drained	2	5	5east	5e	10.1233	49.1857	138.07	966.977	227.715	114.733	459	2206.87	12.2786	14.2188	179.525	355.621	39.6177	5.51774	-0.392185	-6.378	1206.73	5238.37	478.996	11.2668	369.831	13.0845
7100606601	PSP	48.0335	-70.1152	B	72	18	10	532	E	Coniferous	Glacial without particular morphology	Thin to very thin	Well drained	1	5	5east	5e	29.8781	95.8777	151.807	1246.56	249.243	137.7	442.381	2588.24	13.5317	16.7553	154.342	385.344	40.8966	6.39759	0.684883	-4.75676	1050.3	5121.99	429.463	12.2457	301.099	14.9107
7100606602	PSP	48.0374	-70.115	B	70	20	10	589	C	Mixed	Glacial without particular morphology	Medium	Moderately well drained	2	5	5east	5e	28.3864	99.5788	160.099	1200.65	252.071	146.919	468.927	2632.01	12.7714	15.955	153.525	381.683	40.5965	5.92126	1.04586	-4.6552	1053.61	4973.13	426.197	11.5286	298.61	13.5363
7100606602	PSP	48.0374	-70.115	C	73	20	7	589	C	Mixed	Glacial without particular morphology	Medium	Moderately well drained	2	5	5east	5e	28.3864	99.5788	160.099	1200.65	252.071	146.919	468.927	2632.01	12.7714	15.955	153.525	381.683	40.5965	5.92126	1.04586	-4.6552	1053.61	4973.13	426.197	11.5286	298.61	13.5363
7100606901	PSP	48.0495	-70.2157	B	73	21	6	394	D	Coniferous	Glacial without particular morphology	Thin to very thin	Well drained	1	5	5east	5e	30.2932	104.284	158.779	1311.91	253.527	145.921	467.572	2672.2	13.5624	17.1794	150.281	395.683	38.8661	6.80548	1.22243	-4.56776	1037.35	5051.14	402.601	12.6822	300.99	15.0647
7100606902	PSP	48.0464	-70.2192	B	68	23	9	454	D	Mixed	Glacial without particular morphology	Thin	Moderately well drained	1	5	5east	5e	30.0077	100.523	156.38	1293.79	251.913	143.976	461.72	2660.04	13.528	16.9933	152.376	393.316	39.0634	6.79663	1.08803	-4.53614	1038.77	5070.55	404.938	12.6697	300.935	15.2463
7100606902	PSP	48.0464	-70.2192	B	72	22	6	454	D	Mixed	Glacial without particular morphology	Thin	Moderately well drained	1	5	5east	5e	30.0077	100.523	156.38	1293.79	251.913	143.976	461.72	2660.04	13.528	16.9933	152.376	393.316	39.0634	6.79663	1.08803	-4.53614	1038.77	5070.55	404.938	12.6697	300.935	15.2463
7100606902	PSP	48.0464	-70.2192	C	72	22	6	454	D	Mixed	Glacial without particular morphology	Thin	Moderately well drained	1	5	5east	5e	30.0077	100.523	156.38	1293.79	251.913	143.976	461.72	2660.04	13.528	16.9933	152.376	393.316	39.0634	6.79663	1.08803	-4.53614	1038.77	5070.55	404.938	12.6697	300.935	15.2463
7100607001	PSP	48.0664	-70.7841	B	54	34	12	433	C	Coniferous	Juxtaglacial	Thick	Moderately well drained	2	5	5east	5e	19.3093	76.7112	153.499	1213.81	239.961	136.263	461.63	2476.8	13.1714	15.9744	164.247	387.214	34.9355	7.03403	0.924294	-5.17734	1002.57	5006.17	350.243	12.6615	318.521	15.2732
7100607001	PSP	48.0664	-70.7841	C	58	29	13	433	C	Coniferous	Juxtaglacial	Thick	Moderately well drained	2	5	5east	5e	19.3093	76.7112	153.499	1213.81	239.961	136.263	461.63	2476.8	13.1714	15.9744	164.247	387.214	34.9355	7.03403	0.924294	-5.17734	1002.57	5006.17	350.243	12.6615	318.521	15.2732
7100607002	PSP	48.065	-70.7891	B	65	33	2	445	C	Coniferous	Glacial without particular morphology	Thick	Moderately well drained	2	5	5east	5e	19.3093	76.7112	153.499	1213.81	239.961	136.263	461.63	2476.8	13.1714	15.9744	164.247	387.214	34.9355	7.03403	0.924294	-5.17734	1002.57	5006.17	350.243	12.6615	318.521	15.2732
7100607002	PSP	48.065	-70.7891	C	28	59	13	445	C	Coniferous	Glacial without particular morphology	Thick	Moderately well drained	2	5	5east	5e	19.3093	76.7112	153.499	1213.81	239.961	136.263	461.63	2476.8	13.1714	15.9744	164.247	387.214	34.9355	7.03403	0.924294	-5.17734	1002.57	5006.17	350.243	12.6615	318.521	15.2732
7100607101	PSP	48.1674	-70.2663	B	59	33	8	291	D	Coniferous	Glacial without particular morphology	Thin	Well drained	1	5	5east	5e	30.3721	119.795	173.19	1423.62	262.293	159.606	516.099	2742.73	13.574	17.5635	143.5	413.701	34.326	7.50644	2.3048	-2.80494	1015.33	4791.25	347.318	11.6883	305.713	14.6651
7100607201	PSP	48.1673	-70.2828	B	70	18	12	207	D	Mixed	Glacial without particular morphology	Thick	Well drained	2	5	5east	5e	30.7634	121.511	176.134	1443.39	263.425	162.251	520.946	2756.46	13.5601	17.6199	142.911	416.826	33.6614	7.64459	2.5118	-2.56848	1006.55	4753.47	337.336	11.5767	303.223	14.5904
7100607201	PSP	48.1673	-70.2828	C	78	14	8	207	D	Mixed	Glacial without particular morphology	Thick	Well drained	2	5	5east	5e	30.7634	121.511	176.134	1443.39	263.425	162.251	520.946	2756.46	13.5601	17.6199	142.911	416.826	33.6614	7.64459	2.5118	-2.56848	1006.55	4753.47	337.336	11.5767	303.223	14.5904
7100607202	PSP	48.1687	-70.2775	B	85	10	5	239	E	Deciduous	Glacial characterized by its morphology	Thick	Well drained	2	5	5east	5e	30.7634	121.511	176.134	1443.39	263.425	162.251	520.946	2756.46	13.5601	17.6199	142.911	416.826	33.6614	7.64459	2.5118	-2.56848	1006.55	4753.47	337.336	11.5767	303.223	14.5904
7100607202	PSP	48.1687	-70.2775	C	78	17	5	239	E	Deciduous	Glacial characterized by its morphology	Thick	Well drained	2	5	5east	5e	30.7634	121.511	176.134	1443.39	263.425	162.251	520.946	2756.46	13.5601	17.6199	142.911	416.826	33.6614	7.64459	2.5118	-2.56848	1006.55	4753.47	337.336	11.5767	303.223	14.5904
7100607301	PSP	48.1848	-70.1014	B	80	12	8	414	A	Mixed	Glacial without particular morphology	Medium	Moderately well drained	1	5	5east	5e	33.1029	112.725	162.991	1360.73	257.005	150.8	489.079	2700.33	13.6466	17.4204	145.273	402.59	36.8075	7.04663	1.58322	-3.77659	1015.95	4935.68	373.821	12.2033	309.27	14.8858
7100607301	PSP	48.1848	-70.1014	C	78	18	4	414	A	Mixed	Glacial without particular morphology	Medium	Moderately well drained	1	5	5east	5e	33.1029	112.725	162.991	1360.73	257.005	150.8	489.079	2700.33	13.6466	17.4204	145.273	402.59	36.8075	7.04663	1.58322	-3.77659	1015.95	4935.68	373.821	12.2033	309.27	14.8858
7100607302	PSP	48.1885	-70.1011	B	70	22	8	298	E	Mixed	Glacial without particular morphology	Medium	Well drained	2	5	5east	5e	33.1029	112.725	162.991	1360.73	257.005	150.8	489.079	2700.33	13.6466	17.4204	145.273	402.59	36.8075	7.04663	1.58322	-3.77659	1015.95	4935.68	373.821	12.2033	309.27	14.8858
7100607401	PSP	48.184	-71.0828	B	88	9	3	327	C	Mixed	Glacial without particular morphology	Medium	Moderately well drained	2	5	5west	5d	29.8209	100.618	165.35	1391.09	253.264	144.728	459.485	2567.29	13.9328	16.9207	153.647	408.18	32.3394	7.93137	1.9432	-3.96822	939.446	4868.9	303.934	13.0426	302.653	15.725
7100607401	PSP	48.184	-71.0828	C	91	6	3	327	C	Mixed	Glacial without particular morphology	Medium	Moderately well drained	2	5	5west	5d	29.8209	100.618	165.35	1391.09	253.264	144.728	459.485	2567.29	13.9328	16.9207	153.647	408.18	32.3394	7.93137	1.9432	-3.96822	939.446	4868.9	303.934	13.0426	302.653	15.725
7100607402	PSP	48.1802	-71.0829	B	70	24	6	340	B	Coniferous	Glacial without particular morphology	Medium	Moderately well drained	2	5	5west	5d	27.8206	97.3847	163.214	1361.13	252.003	141.659	455.251	2530.5	13.8931	16.7592	155.618	404.489	32.8777	7.80092	1.78511	-4.24072	949.522	4899.95	311.5	13.0715	303.139	15.6054
7100607402	PSP	48.1802	-71.0829	C	77	19	4	340	B	Coniferous	Glacial without particular morphology	Medium	Moderately well drained	2	5	5west	5d	27.8206	97.3847	163.214	1361.13	252.003	141.659	455.251	2530.5	13.8931	16.7592	155.618	404.489	32.8777	7.80092	1.78511	-4.24072	949.522	4899.95	311.5	13.0715	303.139	15.6054
7100607501	PSP	48.217	-70.4159	B	62	28	10	331	E	Coniferous	Glacial without particular morphology	Thin	Moderately well drained	1	4	4east	4d	24.1268	100.777	167.886	1335.46	253.216	152.964	508.43	2669.8	13.2653	17.1488	153.436	403.387	35.2736	7.08198	1.7395	-3.61188	1049.96	4854.12	369.914	11.84	305.953	14.7927
7100607502	PSP	48.2139	-70.4193	B	67	21	12	321	E	Coniferous	Glacial without particular morphology	Medium	Moderately well drained	1	4	4east	4d	23.6034	98.9602	166.235	1316.35	252.339	151.386	505.243	2653.99	13.2172	16.979	154.377	400.908	35.4783	7.00815	1.63005	-3.76043	1051.69	4874.33	372.678	11.8191	308.595	14.7296
7100607502	PSP	48.2139	-70.4193	C	77	19	4	321	E	Coniferous	Glacial without particular morphology	Medium	Moderately well drained	1	4	4east	4d	23.6034	98.9602	166.235	1316.35	252.339	151.386	505.243	2653.99	13.2172	16.979	154.377	400.908	35.4783	7.00815	1.63005	-3.76043	1051.69	4874.33	372.678	11.8191	308.595	14.7296
7100607601	PSP	48.2163	-71.2666	B	64	24	12	421	D	Mixed	Glacial without particular morphology	Medium	Moderately well drained	2	5	5west	5d	24.0583	94.5908	160.247	1317.43	250.579	139.312	477.405	2535.93	13.7043	16.5387	156.99	399.2	33.815	7.55877	1.54393	-4.46071	1019.77	4998.26	343.832	12.9865	319.124	15.3797
7100607601	PSP	48.2163	-71.2666	C	60	28	12	421	D	Mixed	Glacial without particular morphology	Medium	Moderately well drained	2	5	5west	5d	24.0583	94.5908	160.247	1317.43	250.579	139.312	477.405	2535.93	13.7043	16.5387	156.99	399.2	33.815	7.55877	1.54393	-4.46071	1019.77	4998.26	343.832	12.9865	319.124	15.3797
7100607602	PSP	48.2152	-71.261	B	71	21	8	420	C	Mixed	Glacial without particular morphology	Medium	Moderately well drained	2	5	5west	5d	24.0583	94.5908	160.247	1317.43	250.579	139.312	477.405	2535.93	13.7043	16.5387	156.99	399.2	33.815	7.55877	1.54393	-4.46071	1019.77	4998.26	343.832	12.9865	319.124	15.3797
7100607602	PSP	48.2152	-71.261	C	58	33	9	420	C	Mixed	Glacial without particular morphology	Medium	Moderately well drained	2	5	5west	5d	24.0583	94.5908	160.247	1317.43	250.579	139.312	477.405	2535.93	13.7043	16.5387	156.99	399.2	33.815	7.55877	1.54393	-4.46071	1019.77	4998.26	343.832	12.9865	319.124	15.3797
7100607702	PSP	48.2321	-70.1106	B	44	35	21	133	A	Mixed	Marine and littoral	Thick	Moderately well drained	2	4	4east	4d	36.8024	122.299	173.848	1438.15	262.632	162.229	506.331	2775.5	13.5628	17.6371	141.341	414.454	34.6284	7.49195	2.35466	-2.77062	985.771	4783.01	341.632	11.6582	302.301	14.5319
7100607702	PSP	48.2321	-70.1106	C	16	38	46	133	A	Mixed	Marine and littoral	Thick	Moderately well drained	2	4	4east	4d	36.8024	122.299	173.848	1438.15	262.632	162.229	506.331	2775.5	13.5628	17.6371	141.341	414.454	34.6284	7.49195	2.35466	-2.77062	985.771	4783.01	341.632	11.6582	302.301	14.5319
7100607801	PSP	48.2333	-70.166	B	62	26	12	377	C	Mixed	Glacial without particular morphology	Medium	Moderately well drained	1	4	4east	4d	28.6248	109.49	161.967	1351.9	256.23	151.574	502.9	2713.93	13.5619	17.4789	147.734	400.562	37.1443	6.87618	1.39254	-4.05591	1040.72	4958.23	386.116	12.336	313.652	15.0505
7100607801	PSP	48.2333	-70.166	C	71	19	10	377	C	Mixed	Glacial without particular morphology	Medium	Moderately well drained	1	4	4east	4d	28.6248	109.49	161.967	1351.9	256.23	151.574	502.9	2713.93	13.5619	17.4789	147.734	400.562	37.1443	6.87618	1.39254	-4.05591	1040.72	4958.23	386.116	12.336	313.652	15.0505
7100607802	PSP	48.2303	-70.1697	B	72	16	12	270	C	Mixed	Glacial without particular morphology	Thick	Moderately well drained	2	4	4east	4d	31.3627	116.609	168.711	1398.66	259.973	155.983	505.687	2723.31	13.6265	17.5487	144.361	408.603	35.4987	7.24864	1.95448	-3.33935	1016.43	4853.26	360.321	11.988	307.869	14.7838
7100607802	PSP	48.2303	-70.1697	C	50	40	10	270	C	Mixed	Glacial without particular morphology	Thick	Moderately well drained	2	4	4east	4d	31.3627	116.609	168.711	1398.66	259.973	155.983	505.687	2723.31	13.6265	17.5487	144.361	408.603	35.4987	7.24864	1.95448	-3.33935	1016.43	4853.26	360.321	11.988	307.869	14.7838
7100607901	PSP	48.2335	-70.349	B	70	20	10	398	D	Coniferous	Glacial without particular morphology	Thin	Well drained	1	4	4east	4d	23.9409	103.264	167.799	1318.17	254.51	153.583	511.725	2678.55	13.1455	16.9887	152.262	401.638	35.4433	6.92319	1.68861	-3.60931	1050.96	4850.61	372.248	11.5449	310.016	14.3975
7100607901	PSP	48.2335	-70.349	C	76	16	8	398	D	Coniferous	Glacial without particular morphology	Thin	Well drained	1	4	4east	4d	23.9409	103.264	167.799	1318.17	254.51	153.583	511.725	2678.55	13.1455	16.9887	152.262	401.638	35.4433	6.92319	1.68861	-3.60931	1050.96	4850.61	372.248	11.5449	310.016	14.3975
7100607902	PSP	48.2325	-70.3435	B	70	16	14	330	A	Mixed	Glacial without particular morphology	Thick	Poorly drained	5	4	4east	4d	23.9409	103.264	167.799	1318.17	254.51	153.583	511.725	2678.55	13.1455	16.9887	152.262	401.638	35.4433	6.92319	1.68861	-3.60931	1050.96	4850.61	372.248	11.5449	310.016	14.3975
7100607902	PSP	48.2325	-70.3435	C	76	14	10	330	A	Mixed	Glacial without particular morphology	Thick	Poorly drained	5	4	4east	4d	23.9409	103.264	167.799	1318.17	254.51	153.583	511.725	2678.55	13.1455	16.9887	152.262	401.638	35.4433	6.92319	1.68861	-3.60931	1050.96	4850.61	372.248	11.5449	310.016	14.3975
7100608001	PSP	48.2336	-71.0322	B	76	12	12	270	B	Coniferous	Glacial without particular morphology	Thick	Moderately well drained	2	5	5west	5d	31.9804	104.182	166.719	1417.39	254.713	144.716	456.26	2576.42	14.1076	17.064	151.535	411.236	32.4154	8.00256	2.04561	-3.93718	939.34	4867.91	303.861	13.2344	297.327	15.8828
7100608101	PSP	48.2332	-71.2005	B	62	21	17	320	D	Mixed	Glacial without particular morphology	Thin	Moderately well drained	2	5	5west	5d	26.9748	99.1922	161.798	1341.1	252.073	141.617	474.47	2559.23	13.7653	16.6082	153.885	401.933	33.4138	7.68307	1.6778	-4.32963	999.889	4967.03	333.813	13.135	313.689	15.4931
7100608101	PSP	48.2332	-71.2005	C	66	19	15	320	D	Mixed	Glacial without particular morphology	Thin	Moderately well drained	2	5	5west	5d	26.9748	99.1922	161.798	1341.1	252.073	141.617	474.47	2559.23	13.7653	16.6082	153.885	401.933	33.4138	7.68307	1.6778	-4.32963	999.889	4967.03	333.813	13.135	313.689	15.4931
7100608102	PSP	48.2303	-71.2042	B	53	31	16	388	B	Mixed	Glacial without particular morphology	Medium	Moderately well drained	2	5	5west	5d	26.9748	99.1922	161.798	1341.1	252.073	141.617	474.47	2559.23	13.7653	16.6082	153.885	401.933	33.4138	7.68307	1.6778	-4.32963	999.889	4967.03	333.813	13.135	313.689	15.4931
7100608102	PSP	48.2303	-71.2042	C	71	21	8	388	B	Mixed	Glacial without particular morphology	Medium	Moderately well drained	2	5	5west	5d	26.9748	99.1922	161.798	1341.1	252.073	141.617	474.47	2559.23	13.7653	16.6082	153.885	401.933	33.4138	7.68307	1.6778	-4.32963	999.889	4967.03	333.813	13.135	313.689	15.4931
7100608201	PSP	48.2669	-70.5334	B	64	22	14	320	C	Mixed	Glacial without particular morphology	Medium	Moderately well drained	2	4	4east	4d	22.6308	104.761	169.863	1362.26	256.286	155.459	534.798	2702.67	13.3238	17.0654	152.522	406.773	33.8497	7.3602	1.88633	-3.60908	1061.4	4847.44	359.029	11.8741	323.52	14.7589
7100608202	PSP	48.2699	-70.5295	B	68	20	12	337	D	Mixed	Glacial without particular morphology	Medium	Moderately well drained	2	4	4east	4d	21.8813	101.163	166.544	1318.04	254.32	151.75	521.878	2659.84	13.2114	16.7937	154.16	401.266	34.6029	7.12753	1.62099	-3.82968	1057.94	4882.12	365.531	11.8185	321.659	14.6337
7100608202	PSP	48.2699	-70.5295	C	70	20	10	337	D	Mixed	Glacial without particular morphology	Medium	Moderately well drained	2	4	4east	4d	21.8813	101.163	166.544	1318.04	254.32	151.75	521.878	2659.84	13.2114	16.7937	154.16	401.266	34.6029	7.12753	1.62099	-3.82968	1057.94	4882.12	365.531	11.8185	321.659	14.6337
7100608401	PSP	48.2664	-71.2679	B	79	13	8	276	D	Mixed	Glacial without particular morphology	Thin	Moderately well drained	2	5	5west	5d	33.8019	109.804	169.233	1439.65	256.989	149.699	487.376	2626.58	14.0299	17.2576	148.186	414.563	31.4965	8.01363	2.19986	-3.58142	966.414	4850.54	303.585	12.8995	303.762	15.5212
7100608401	PSP	48.2664	-71.2679	C	76	17	7	276	D	Mixed	Glacial without particular morphology	Thin	Moderately well drained	2	5	5west	5d	33.8019	109.804	169.233	1439.65	256.989	149.699	487.376	2626.58	14.0299	17.2576	148.186	414.563	31.4965	8.01363	2.19986	-3.58142	966.414	4850.54	303.585	12.8995	303.762	15.5212
7100608402	PSP	48.2696	-71.2711	B	83	10	7	308	C	Deciduous	Glacial without particular morphology	Thick	Moderately well drained	2	5	5west	5d	30.9394	107.422	166.33	1402.01	256.12	146.942	488.308	2602.43	13.9155	16.9746	149.69	410.069	32.1875	7.87438	1.98076	-3.80276	990.328	4893.49	317.79	12.8788	310.247	15.3681
7100608402	PSP	48.2696	-71.2711	C	73	23	4	308	C	Deciduous	Glacial without particular morphology	Thick	Moderately well drained	2	5	5west	5d	30.9394	107.422	166.33	1402.01	256.12	146.942	488.308	2602.43	13.9155	16.9746	149.69	410.069	32.1875	7.87438	1.98076	-3.80276	990.328	4893.49	317.79	12.8788	310.247	15.3681
7100608601	PSP	48.3172	-70.466	B	67	23	10	372	D	Coniferous	Glacial without particular morphology	Medium	Moderately well drained	2	4	4east	4d	21.6816	100.114	165.508	1301.54	253.708	151.002	520.299	2657.59	13.1559	16.759	154.593	398.64	35.2108	6.94555	1.48982	-3.98263	1065.09	4895.88	374.198	11.7759	321.787	14.5187
7100608602	PSP	48.3141	-70.4693	B	52	36	12	362	D	Mixed	Glacial without particular morphology	Thick	Moderately well drained	5	4	4east	4d	21.5219	99.5158	164.959	1291.38	253.382	150.544	517.745	2652.14	13.1087	16.6817	154.864	397.494	35.3579	6.90428	1.44424	-3.98992	1065.59	4900.07	376.286	11.7414	321.406	14.5
7100608602	PSP	48.3141	-70.4693	C	62	27	11	362	D	Mixed	Glacial without particular morphology	Thick	Moderately well drained	5	4	4east	4d	21.5219	99.5158	164.959	1291.38	253.382	150.544	517.745	2652.14	13.1087	16.6817	154.864	397.494	35.3579	6.90428	1.44424	-3.98992	1065.59	4900.07	376.286	11.7414	321.406	14.5
7100608801	PSP	48.333	-71.6657	B	75	16	9	329	D	Mixed	Glacial without particular morphology	Medium	Well drained	1	5	5west	5d	36.8678	96.7912	168.028	1371.1	252.924	149.604	491.302	2590.17	13.5868	16.9731	157.137	405.75	32.241	7.18858	1.71014	-4.0056	968.349	4796.23	311.59	11.7101	309.708	14.2841
7100608802	PSP	48.3293	-71.666	B	73	16	11	344	C	Coniferous	Bedrock	Very thin or absent	Moderately well drained	1	5	5west	5d	36.8678	96.7912	168.028	1371.1	252.924	149.604	491.302	2590.17	13.5868	16.9731	157.137	405.75	32.241	7.18858	1.71014	-4.0056	968.349	4796.23	311.59	11.7101	309.708	14.2841
7100608802	PSP	48.3293	-71.666	C	86	8	6	344	C	Coniferous	Bedrock	Very thin or absent	Moderately well drained	1	5	5west	5d	36.8678	96.7912	168.028	1371.1	252.924	149.604	491.302	2590.17	13.5868	16.9731	157.137	405.75	32.241	7.18858	1.71014	-4.0056	968.349	4796.23	311.59	11.7101	309.708	14.2841
7100800201	PSP	45.45	-75.8329	B	72	20	8	119	A	Mixed	Marine and littoral	Thick	Somewhat poorly drained	5	1	1	1a	77.2497	150.742	208.418	2082.35	276.366	188.589	544.726	3114.45	15.6573	20.6603	126.634	495.981	26.6502	11.3014	6.14735	0.988029	951.123	4768.65	252.283	12.6967	269.702	16.5921
7100800201	PSP	45.45	-75.8329	C	51	27	22	119	A	Mixed	Marine and littoral	Thick	Somewhat poorly drained	5	1	1	1a	77.2497	150.742	208.418	2082.35	276.366	188.589	544.726	3114.45	15.6573	20.6603	126.634	495.981	26.6502	11.3014	6.14735	0.988029	951.123	4768.65	252.283	12.6967	269.702	16.5921
7100800301	PSP	45.4665	-75.7832	B	76	20	4	120	D	Deciduous	Glacial without particular morphology	Thin to very thin	Well drained	2	2	2west	2a	78.823	152.841	209.435	2092.3	277.536	189.934	551.798	3118.67	15.6602	20.6924	125.702	497.099	26.9214	11.2679	6.17452	1.05	962.355	4755.38	257.459	12.4985	271.207	16.2812
7100800301	PSP	45.4665	-75.7832	C	86	11	3	120	D	Deciduous	Glacial without particular morphology	Thin to very thin	Well drained	2	2	2west	2a	78.823	152.841	209.435	2092.3	277.536	189.934	551.798	3118.67	15.6602	20.6924	125.702	497.099	26.9214	11.2679	6.17452	1.05	962.355	4755.38	257.459	12.4985	271.207	16.2812
7100800302	PSP	45.4704	-75.7833	B	79	16	5	130	B	Deciduous	Glacial without particular morphology	Medium	Moderately well drained	2	2	2west	2a	77.4956	150.897	207.774	2066.65	276.563	186.804	549.206	3090.78	15.6727	20.5979	126.673	494.317	26.9452	11.2873	6.07794	1.00342	969.601	4774.99	259.644	12.5644	273.11	16.4624
7100800302	PSP	45.4704	-75.7833	C	82	16	2	130	B	Deciduous	Glacial without particular morphology	Medium	Moderately well drained	2	2	2west	2a	77.4956	150.897	207.774	2066.65	276.563	186.804	549.206	3090.78	15.6727	20.5979	126.673	494.317	26.9452	11.2873	6.07794	1.00342	969.601	4774.99	259.644	12.5644	273.11	16.4624
7100800401	PSP	45.5171	-75.8665	B	65	25	10	280	F	Deciduous	Glacial without particular morphology	Thin	Well drained	2	2	2west	2a	45.608	120.917	190.353	1760.96	261.756	168.79	555.976	2977.8	14.89	19.0062	141.84	457.777	29.1657	10.4532	4.69866	-1.00599	1083.94	4986.47	314.403	13.2792	303.236	17.0146
7100800401	PSP	45.5171	-75.8665	C	77	16	7	280	F	Deciduous	Glacial without particular morphology	Thin	Well drained	2	2	2west	2a	45.608	120.917	190.353	1760.96	261.756	168.79	555.976	2977.8	14.89	19.0062	141.84	457.777	29.1657	10.4532	4.69866	-1.00599	1083.94	4986.47	314.403	13.2792	303.236	17.0146
7100800402	PSP	45.5159	-75.872	B	77	19	4	331	D	Deciduous	Glacial without particular morphology	Medium	Moderately well drained	2	2	2west	2a	44.908	118.932	188.986	1751.21	261.118	166.824	557.384	2959.14	14.8871	18.9108	143.184	456.844	29.4012	10.3872	4.63934	-1.16001	1095.6	5014.64	321.144	13.3331	311.757	16.9617
7100800402	PSP	45.5159	-75.872	C	73	22	5	331	D	Deciduous	Glacial without particular morphology	Medium	Moderately well drained	2	2	2west	2a	44.908	118.932	188.986	1751.21	261.118	166.824	557.384	2959.14	14.8871	18.9108	143.184	456.844	29.4012	10.3872	4.63934	-1.16001	1095.6	5014.64	321.144	13.3331	311.757	16.9617
7100800501	PSP	45.5498	-75.8651	B	65	29	6	233	D	Deciduous	Glacial without particular morphology	Thin	Moderately well drained	2	2	2west	2a	51.7274	124.967	195.822	1870.12	263.8	174.272	553.835	3009.34	15.2039	19.6652	139.833	470.274	27.9003	10.8722	5.16996	-0.575251	1047.29	4904.29	290.945	13.3318	291.506	17.2837
7100800501	PSP	45.5498	-75.8651	C	75	18	7	233	D	Deciduous	Glacial without particular morphology	Thin	Moderately well drained	2	2	2west	2a	51.7274	124.967	195.822	1870.12	263.8	174.272	553.835	3009.34	15.2039	19.6652	139.833	470.274	27.9003	10.8722	5.16996	-0.575251	1047.29	4904.29	290.945	13.3318	291.506	17.2837
7100800501	PSP	45.5498	-75.8651	C	75	18	7	233	D	Deciduous	Glacial without particular morphology	Thin	Moderately well drained	2	2	2west	2a	51.7274	124.967	195.822	1870.12	263.8	174.272	553.835	3009.34	15.2039	19.6652	139.833	470.274	27.9003	10.8722	5.16996	-0.575251	1047.29	4904.29	290.945	13.3318	291.506	17.2837
7100800502	PSP	45.5459	-75.8654	B	85	11	4	220	D	Deciduous	Glacial without particular morphology	Thin	Moderately well drained	2	2	2west	2a	51.7274	124.967	195.822	1870.12	263.8	174.272	553.835	3009.34	15.2039	19.6652	139.833	470.274	27.9003	10.8722	5.16996	-0.575251	1047.29	4904.29	290.945	13.3318	291.506	17.2837
7100800601	PSP	45.55	-76.5836	B	5	21	74	75	A	Deciduous	Fluvial	Thick	Poorly drained	8	1	1	1a	93.6003	135.346	203.744	2039	267.797	180.896	452.092	3017.69	15.755	20.6347	133.447	488.995	26.6905	11.2935	5.74649	0.235395	815.025	4740.08	217.001	13.6983	227.781	18.3718
7100800601	PSP	45.55	-76.5836	B	6	24	70	75	A	Deciduous	Fluvial	Thick	Poorly drained	8	1	1	1a	93.6003	135.346	203.744	2039	267.797	180.896	452.092	3017.69	15.755	20.6347	133.447	488.995	26.6905	11.2935	5.74649	0.235395	815.025	4740.08	217.001	13.6983	227.781	18.3718
7100800601	PSP	45.55	-76.5836	C	10	25	65	75	A	Deciduous	Fluvial	Thick	Poorly drained	8	1	1	1a	93.6003	135.346	203.744	2039	267.797	180.896	452.092	3017.69	15.755	20.6347	133.447	488.995	26.6905	11.2935	5.74649	0.235395	815.025	4740.08	217.001	13.6983	227.781	18.3718
7100800602	PSP	45.553	-76.5805	B	95	4	1	85	B	Mixed	Fluvial	Thick	Well drained	1	1	1	1a	91.6062	135.208	203.658	2034.8	267.658	181.034	453.828	3022.6	15.737	20.594	133.452	488.496	26.8516	11.2664	5.73123	0.187847	819.357	4740.91	219.257	13.7136	227.768	18.2832
7100800602	PSP	45.553	-76.5805	C	88	9	3	85	B	Mixed	Fluvial	Thick	Well drained	1	1	1	1a	91.6062	135.208	203.658	2034.8	267.658	181.034	453.828	3022.6	15.737	20.594	133.452	488.496	26.8516	11.2664	5.73123	0.187847	819.357	4740.91	219.257	13.7136	227.768	18.2832
7100800701	PSP	45.5497	-76.5981	B	60	21	19	84	B	Coniferous	Glacial without particular morphology	Medium	Poorly drained	8	1	1	1a	93.9548	137.616	205.028	2052.79	268.971	182.863	454.454	3032.81	15.7377	20.7518	132.358	490.798	26.8115	11.3229	5.81788	0.300415	815.179	4727.38	217.874	13.6614	225.879	18.2725
7100800701	PSP	45.5497	-76.5981	B	73	18	10	84	B	Coniferous	Glacial without particular morphology	Medium	Poorly drained	8	1	1	1a	93.9548	137.616	205.028	2052.79	268.971	182.863	454.454	3032.81	15.7377	20.7518	132.358	490.798	26.8115	11.3229	5.81788	0.300415	815.179	4727.38	217.874	13.6614	225.879	18.2725
7100800701	PSP	45.5497	-76.5981	C	48	39	13	84	B	Coniferous	Glacial without particular morphology	Medium	Poorly drained	8	1	1	1a	93.9548	137.616	205.028	2052.79	268.971	182.863	454.454	3032.81	15.7377	20.7518	132.358	490.798	26.8115	11.3229	5.81788	0.300415	815.179	4727.38	217.874	13.6614	225.879	18.2725
7100800702	PSP	45.5462	-76.5951	B	84	10	6	83	B	Coniferous	Bedrock	Very thin or absent	Well drained	2	1	1	1a	93.9548	137.616	205.028	2052.79	268.971	182.863	454.454	3032.81	15.7377	20.7518	132.358	490.798	26.8115	11.3229	5.81788	0.300415	815.179	4727.38	217.874	13.6614	225.879	18.2725
7100800702	PSP	45.5462	-76.5951	B	86	14	0	83	B	Coniferous	Bedrock	Very thin or absent	Well drained	2	1	1	1a	93.9548	137.616	205.028	2052.79	268.971	182.863	454.454	3032.81	15.7377	20.7518	132.358	490.798	26.8115	11.3229	5.81788	0.300415	815.179	4727.38	217.874	13.6614	225.879	18.2725
7100800801	PSP	45.5666	-76.2829	B	87	9	4	120	D	Deciduous	Marine and littoral	Thick	Moderately well drained	1	1	1	1a	112.71	146.931	207.457	2039.33	273.398	184.328	418.715	3051.33	15.627	20.5754	127.475	490.139	27.7654	11.0838	5.84073	0.561502	765.087	4738.66	211.962	12.5833	205.673	16.7247
7100800801	PSP	45.5666	-76.2829	B	89	9	3	120	D	Deciduous	Marine and littoral	Thick	Moderately well drained	1	1	1	1a	112.71	146.931	207.457	2039.33	273.398	184.328	418.715	3051.33	15.627	20.5754	127.475	490.139	27.7654	11.0838	5.84073	0.561502	765.087	4738.66	211.962	12.5833	205.673	16.7247
7100800801	PSP	45.5666	-76.2829	C	94	5	1	120	D	Deciduous	Marine and littoral	Thick	Moderately well drained	1	1	1	1a	112.71	146.931	207.457	2039.33	273.398	184.328	418.715	3051.33	15.627	20.5754	127.475	490.139	27.7654	11.0838	5.84073	0.561502	765.087	4738.66	211.962	12.5833	205.673	16.7247
7100800901	PSP	45.5664	-76.5831	B	84	15	1	100	A	Mixed	Marine and littoral	Thick	Moderately well drained	2	1	1	1a	87.689	133.377	202.683	2016.35	266.876	179.619	458.188	3007.01	15.6981	20.4623	134.498	486.375	26.6813	11.2383	5.65368	0.0888588	829.555	4752.17	220.713	13.7129	233.033	18.2389
7100800901	PSP	45.5664	-76.5831	C	90	9	1	100	A	Mixed	Marine and littoral	Thick	Moderately well drained	2	1	1	1a	87.689	133.377	202.683	2016.35	266.876	179.619	458.188	3007.01	15.6981	20.4623	134.498	486.375	26.6813	11.2383	5.65368	0.0888588	829.555	4752.17	220.713	13.7129	233.033	18.2389
7100800902	PSP	45.5676	-76.5883	B	54	30	16	90	D	Coniferous	Marine and littoral	Thick	Somewhat poorly drained	2	1	1	1a	86.5067	134.525	202.345	2014.02	267.286	179.623	463.232	2999.73	15.6873	20.4486	133.761	486.112	26.5738	11.2421	5.64681	0.096873	836.218	4752.02	221.574	13.6932	235.521	18.2213
7100800902	PSP	45.5676	-76.5883	C	12	31	57	90	D	Coniferous	Marine and littoral	Thick	Somewhat poorly drained	2	1	1	1a	86.5067	134.525	202.345	2014.02	267.286	179.623	463.232	2999.73	15.6873	20.4486	133.761	486.112	26.5738	11.2421	5.64681	0.096873	836.218	4752.02	221.574	13.6932	235.521	18.2213
7100801001	PSP	45.5832	-76.066	B	64	33	4	201	C	Deciduous	Juxtaglacial	Thick	Moderately well drained	2	2	2west	2a	62.8715	123.331	193.399	1853.49	262.058	170.34	499.401	2987.44	15.2877	19.4157	139.725	468.338	29.3523	10.9312	5.06563	-0.793192	986.259	4945.96	288.479	13.7816	271.015	17.7558
7100801001	PSP	45.5832	-76.066	B	69	27	4	201	C	Deciduous	Juxtaglacial	Thick	Moderately well drained	2	2	2west	2a	62.8715	123.331	193.399	1853.49	262.058	170.34	499.401	2987.44	15.2877	19.4157	139.725	468.338	29.3523	10.9312	5.06563	-0.793192	986.259	4945.96	288.479	13.7816	271.015	17.7558
7100801001	PSP	45.5832	-76.066	C	78	20	2	201	C	Deciduous	Juxtaglacial	Thick	Moderately well drained	2	2	2west	2a	62.8715	123.331	193.399	1853.49	262.058	170.34	499.401	2987.44	15.2877	19.4157	139.725	468.338	29.3523	10.9312	5.06563	-0.793192	986.259	4945.96	288.479	13.7816	271.015	17.7558
7100801002	PSP	45.5872	-76.0661	B	75	21	4	251	D	Mixed	Glacial without particular morphology	Medium	Well drained	2	2	2west	2a	54.0603	115.352	187.655	1741.76	259.114	164.841	498.537	2940.46	14.93	18.9013	144.769	455.222	29.8174	10.5041	4.5581	-1.39271	1011.2	5009.66	301.12	13.8287	280.2	17.57
7100801002	PSP	45.5872	-76.0661	C	77	21	2	251	D	Mixed	Glacial without particular morphology	Medium	Well drained	2	2	2west	2a	54.0603	115.352	187.655	1741.76	259.114	164.841	498.537	2940.46	14.93	18.9013	144.769	455.222	29.8174	10.5041	4.5581	-1.39271	1011.2	5009.66	301.12	13.8287	280.2	17.57
7100801101	PSP	45.5844	-76.1659	B	44	50	6	238	D	Mixed	Bedrock	Very thin or absent	Somewhat excessively drained	0	2	2west	2a	65.5504	127.261	196.789	1859.24	263.873	174.162	498.499	2974.45	15.1519	19.4912	137.624	468.908	28.3769	10.6692	5.13726	-0.3712	942.95	4859.05	267.915	12.8723	267.075	16.6299
7100801102	PSP	45.5886	-76.165	B	54	41	5	280	B	Mixed	Glacial without particular morphology	Thin to very thin	Somewhat excessively drained	2	2	2west	2a	65.5504	127.261	196.789	1859.24	263.873	174.162	498.499	2974.45	15.1519	19.4912	137.624	468.908	28.3769	10.6692	5.13726	-0.3712	942.95	4859.05	267.915	12.8723	267.075	16.6299
7100801201	PSP	45.5835	-76.233	B	62	31	7	220	F	Deciduous	Glacial without particular morphology	Thin to very thin	Well drained	2	2	2west	2a	91.7782	139.388	204.233	1989.95	269.489	179.895	445.528	3016.82	15.5743	20.0935	131.102	484.286	27.639	11.0841	5.68466	0.159218	828.661	4785.81	227.664	12.9742	226.284	16.9731
7100801202	PSP	45.5821	-76.2385	B	56	36	8	212	E	Deciduous	Bedrock	Very thin or absent	Somewhat excessively drained	0	2	2west	2a	93.5185	139.308	204.067	1986.14	269.443	179.817	444.12	3015.2	15.5553	20.0682	131.129	483.854	27.6564	11.057	5.66589	0.193673	826.308	4783.19	227.701	12.9344	227.145	16.9261
7100801301	PSP	45.5844	-76.3842	B	46	49	5	192	C	Deciduous	Glacial without particular morphology	Thin to very thin	Well drained	2	1	1	1a	72.6031	127.324	197.776	1919.08	262.759	173.763	476.257	2949.11	15.4678	19.7144	136.438	474.614	26.9428	10.7872	5.21802	-0.288285	882.573	4813.32	236.575	13.3818	256.367	17.5196
7100801302	PSP	45.5805	-76.3842	B	54	42	4	193	D	Deciduous	Glacial without particular morphology	Medium	Well drained	2	1	1	1a	72.2051	127.394	197.524	1914.15	262.693	173.427	477.787	2951.9	15.4616	19.6736	136.303	473.92	27.1734	10.76	5.19337	-0.265403	887.675	4819.52	240.287	13.3573	257.509	17.4953
7100801302	PSP	45.5805	-76.3842	C	66	32	2	193	D	Deciduous	Glacial without particular morphology	Medium	Well drained	2	1	1	1a	72.2051	127.394	197.524	1914.15	262.693	173.427	477.787	2951.9	15.4616	19.6736	136.303	473.92	27.1734	10.76	5.19337	-0.265403	887.675	4819.52	240.287	13.3573	257.509	17.4953
7100801401	PSP	45.583	-76.6166	B	75	15	10	100	D	Coniferous	Glacial without particular morphology	Thin to very thin	Well drained	0	1	1	1a	88.9187	139.021	204.653	2045.73	269.524	182.689	465.517	3027.01	15.7178	20.7449	131.51	489.929	26.9253	11.3012	5.78756	0.26124	834.942	4728.29	224.208	13.5975	231.369	18.139
7100801401	PSP	45.583	-76.6166	B	75	15	10	100	D	Coniferous	Glacial without particular morphology	Thin to very thin	Well drained	0	1	1	1a	88.9187	139.021	204.653	2045.73	269.524	182.689	465.517	3027.01	15.7178	20.7449	131.51	489.929	26.9253	11.3012	5.78756	0.26124	834.942	4728.29	224.208	13.5975	231.369	18.139
7100801402	PSP	45.5795	-76.6137	B	74	14	12	92	B	Coniferous	Glacial without particular morphology	Thin to very thin	Well drained	2	1	1	1a	88.9187	139.021	204.653	2045.73	269.524	182.689	465.517	3027.01	15.7178	20.7449	131.51	489.929	26.9253	11.3012	5.78756	0.26124	834.942	4728.29	224.208	13.5975	231.369	18.139
7100801501	PSP	45.5998	-75.9506	B	60	35	5	248	C	Deciduous	Glacial without particular morphology	Thin	Moderately well drained	2	2	2west	2a	52.4776	121.438	194.242	1864.15	262.408	172.348	538.523	2995.89	15.247	19.4889	141.973	469.681	28.2429	10.9344	5.12069	-0.815987	1031.17	4922.9	290.072	13.7023	288.342	17.6533
7100801502	PSP	45.6029	-75.947	B	47	43	10	232	E	Deciduous	Glacial without particular morphology	Medium	Moderately well drained	2	2	2west	2a	50.0804	120.363	193.064	1844.29	261.985	170.865	536.932	2976.66	15.2089	19.4184	142.622	467.171	27.9851	10.911	5.0322	-0.844386	1033.75	4922.85	287.691	13.722	287.924	17.7238
7100801502	PSP	45.6029	-75.947	B	47	43	10	232	E	Deciduous	Glacial without particular morphology	Medium	Moderately well drained	2	2	2west	2a	50.0804	120.363	193.064	1844.29	261.985	170.865	536.932	2976.66	15.2089	19.4184	142.622	467.171	27.9851	10.911	5.0322	-0.844386	1033.75	4922.85	287.691	13.722	287.924	17.7238
7100801502	PSP	45.6029	-75.947	C	54	36	10	232	E	Deciduous	Glacial without particular morphology	Medium	Moderately well drained	2	2	2west	2a	50.0804	120.363	193.064	1844.29	261.985	170.865	536.932	2976.66	15.2089	19.4184	142.622	467.171	27.9851	10.911	5.0322	-0.844386	1033.75	4922.85	287.691	13.722	287.924	17.7238
7100801502	PSP	45.6029	-75.947	C	54	36	10	232	E	Deciduous	Glacial without particular morphology	Medium	Moderately well drained	2	2	2west	2a	50.0804	120.363	193.064	1844.29	261.985	170.865	536.932	2976.66	15.2089	19.4184	142.622	467.171	27.9851	10.911	5.0322	-0.844386	1033.75	4922.85	287.691	13.722	287.924	17.7238
7100801601	PSP	45.6002	-76.0168	B	77	16	7	203	F	Mixed	Slope and in situ weathered	Thick	Somewhat excessively drained	2	2	2west	2a	50.2533	115.865	188.686	1769.32	259.691	166.272	518.392	2955.74	15.0221	19.0194	144.822	458.515	29.3981	10.6544	4.68417	-1.27208	1039.88	4992.07	304.452	13.7954	287.372	17.6429
7100801602	PSP	45.599	-76.0113	B	65	28	7	237	D	Deciduous	Glacial without particular morphology	Medium	Moderately well drained	5	2	2west	2a	50.2533	115.865	188.686	1769.32	259.691	166.272	518.392	2955.74	15.0221	19.0194	144.822	458.515	29.3981	10.6544	4.68417	-1.27208	1039.88	4992.07	304.452	13.7954	287.372	17.6429
7100801602	PSP	45.599	-76.0113	C	68	24	8	237	D	Deciduous	Glacial without particular morphology	Medium	Moderately well drained	5	2	2west	2a	50.2533	115.865	188.686	1769.32	259.691	166.272	518.392	2955.74	15.0221	19.0194	144.822	458.515	29.3981	10.6544	4.68417	-1.27208	1039.88	4992.07	304.452	13.7954	287.372	17.6429
7100801701	PSP	45.6014	-76.2993	B	70	26	4	182	B	Mixed	Glacial without particular morphology	Thin	Moderately well drained	2	1	1	1a	79.8169	130.719	199.483	1932.96	264.802	176.687	468.449	2979.71	15.4086	19.8517	135.083	476.651	27.0618	10.8136	5.31659	-0.140777	858.515	4796.1	232.4	13.0826	248.2	17.1031
7100801702	PSP	45.5992	-76.2944	B	52	33	15	183	B	Deciduous	Glacial without particular morphology	Medium	Well drained	2	1	1	1a	84.7986	133.468	201.45	1957.66	266.137	179.567	458.574	3011.63	15.4159	20.0238	133.669	479.537	27.0852	10.8424	5.42798	-0.0238407	832.161	4777.21	224.603	13.0074	236.804	17.0598
7100801702	PSP	45.5992	-76.2944	C	88	11	1	183	B	Deciduous	Glacial without particular morphology	Medium	Well drained	2	1	1	1a	84.7986	133.468	201.45	1957.66	266.137	179.567	458.574	3011.63	15.4159	20.0238	133.669	479.537	27.0852	10.8424	5.42798	-0.0238407	832.161	4777.21	224.603	13.0074	236.804	17.0598
7100801801	PSP	45.6327	-76.384	B	83	13	4	157	A	Coniferous	Marine and littoral	Thick	Well drained	2	1	1	1a	68.4323	123.572	197.224	1926.69	261.611	173.409	480.772	2944.74	15.5095	19.7193	139.039	475.626	26.0959	10.9159	5.24571	-0.453534	878.848	4800.24	228.311	13.6596	257.764	17.833
7100801801	PSP	45.6327	-76.384	C	95	4	1	157	A	Coniferous	Marine and littoral	Thick	Well drained	2	1	1	1a	68.4323	123.572	197.224	1926.69	261.611	173.409	480.772	2944.74	15.5095	19.7193	139.039	475.626	26.0959	10.9159	5.24571	-0.453534	878.848	4800.24	228.311	13.6596	257.764	17.833
7100801802	PSP	45.636	-76.3803	B	88	9	3	160	A	Coniferous	Marine and littoral	Thick	Well drained	1	1	1	1a	68.268	123.144	197.516	1926.65	261.37	172.968	477.723	2939.04	15.5185	19.7021	139.222	475.819	25.9973	10.9356	5.25909	-0.480098	876.259	4797.15	226.45	13.6818	256.598	17.8273
7100801802	PSP	45.636	-76.3803	C	98	2	0	160	A	Coniferous	Marine and littoral	Thick	Well drained	1	1	1	1a	68.268	123.144	197.516	1926.65	261.37	172.968	477.723	2939.04	15.5185	19.7021	139.222	475.819	25.9973	10.9356	5.25909	-0.480098	876.259	4797.15	226.45	13.6818	256.598	17.8273
7100801901	PSP	45.6665	-76.0838	B	61	39	0	245	D	Mixed	Glacial without particular morphology	Thin to very thin	Moderately well drained	2	2	2west	2a	61.0625	122.875	193.011	1835	262.382	171.474	508.351	2988.45	15.1533	19.3955	140.51	465.854	29.0083	10.7653	4.94674	-0.862962	985.979	4925.26	285.531	13.5633	274.174	17.4845
7100801901	PSP	45.6665	-76.0838	C	58	39	3	245	D	Mixed	Glacial without particular morphology	Thin to very thin	Moderately well drained	2	2	2west	2a	61.0625	122.875	193.011	1835	262.382	171.474	508.351	2988.45	15.1533	19.3955	140.51	465.854	29.0083	10.7653	4.94674	-0.862962	985.979	4925.26	285.531	13.5633	274.174	17.4845
7100802001	PSP	45.6666	-76.2334	B	64	32	4	261	D	Deciduous	Glacial without particular morphology	Thin to very thin	Well drained	2	2	2west	2a	53.3484	119.872	191.064	1791.17	260.207	168.037	510.567	2933.43	15.0491	19.0658	141.332	460.102	29.0842	10.3986	4.67775	-0.990584	995.691	4927.02	289.303	13.2893	286.11	17.0591
7100802002	PSP	45.6634	-76.2297	B	72	25	3	285	C	Deciduous	Glacial without particular morphology	Medium	Well drained	2	2	2west	2a	53.3484	119.872	191.064	1791.17	260.207	168.037	510.567	2933.43	15.0491	19.0658	141.332	460.102	29.0842	10.3986	4.67775	-0.990584	995.691	4927.02	289.303	13.2893	286.11	17.0591
7100802002	PSP	45.6634	-76.2297	C	90	8	2	285	C	Deciduous	Glacial without particular morphology	Medium	Well drained	2	2	2west	2a	53.3484	119.872	191.064	1791.17	260.207	168.037	510.567	2933.43	15.0491	19.0658	141.332	460.102	29.0842	10.3986	4.67775	-0.990584	995.691	4927.02	289.303	13.2893	286.11	17.0591
7100802201	PSP	45.6666	-76.6337	B	74	16	10	120	D	Mixed	Bedrock	Very thin or absent	Moderately well drained	0	1	1	1a	84.8057	133.734	202.51	2013.81	267.131	180.055	463.579	3003.69	15.6751	20.5091	134.395	485.894	26.7347	11.2156	5.62312	-0.00831647	834.721	4741.23	222.333	13.7362	235.029	18.2514
7100802202	PSP	45.6635	-76.6373	B	28	48	24	138	A	Coniferous	Marine and littoral	Thick	Moderately well drained	3	1	1	1a	76.3931	128.675	198.467	1947.68	264.399	175.4	468.276	2967.57	15.5469	20.0704	136.725	477.997	27.2276	10.9837	5.31598	-0.335608	863.271	4787.87	234.71	13.7187	246.272	18.0297
7100802202	PSP	45.6635	-76.6373	C	14	38	48	138	A	Coniferous	Marine and littoral	Thick	Moderately well drained	3	1	1	1a	76.3931	128.675	198.467	1947.68	264.399	175.4	468.276	2967.57	15.5469	20.0704	136.725	477.997	27.2276	10.9837	5.31598	-0.335608	863.271	4787.87	234.71	13.7187	246.272	18.0297
7100802302	PSP	45.6873	-75.8837	B	60	30	10	208	C	Mixed	Glacial without particular morphology	Thick	Moderately well drained	2	2	2west	2a	52.0632	125.512	195.521	1876.57	263.949	175.097	550.245	3005.03	15.2091	19.5993	139.44	471.001	27.5006	10.9548	5.16942	-0.572097	1025.77	4877.4	280.614	13.4559	286.889	17.386
7100802302	PSP	45.6873	-75.8837	B	60	30	10	208	C	Mixed	Glacial without particular morphology	Thick	Moderately well drained	2	2	2west	2a	52.0632	125.512	195.521	1876.57	263.949	175.097	550.245	3005.03	15.2091	19.5993	139.44	471.001	27.5006	10.9548	5.16942	-0.572097	1025.77	4877.4	280.614	13.4559	286.889	17.386
7100802302	PSP	45.6873	-75.8837	C	63	27	10	208	C	Mixed	Glacial without particular morphology	Thick	Moderately well drained	2	2	2west	2a	52.0632	125.512	195.521	1876.57	263.949	175.097	550.245	3005.03	15.2091	19.5993	139.44	471.001	27.5006	10.9548	5.16942	-0.572097	1025.77	4877.4	280.614	13.4559	286.889	17.386
7100802302	PSP	45.6873	-75.8837	C	63	27	10	208	C	Mixed	Glacial without particular morphology	Thick	Moderately well drained	2	2	2west	2a	52.0632	125.512	195.521	1876.57	263.949	175.097	550.245	3005.03	15.2091	19.5993	139.44	471.001	27.5006	10.9548	5.16942	-0.572097	1025.77	4877.4	280.614	13.4559	286.889	17.386
7100802401	PSP	45.6998	-76.0658	B	64	35	1	205	D	Mixed	Glacial without particular morphology	Medium	Moderately well drained	2	2	2west	2a	60.7357	124.855	194.933	1875.93	263.238	173.996	513.871	3011.47	15.2643	19.6294	139.391	470.619	28.5322	10.94	5.11088	-0.752482	978.686	4897.97	278.157	13.7021	272.041	17.6872
7100802402	PSP	45.7037	-76.0661	B	53	38	9	270	D	Deciduous	Glacial without particular morphology	Thin to very thin	Well drained	0	2	2west	2a	45.6099	111.545	185.406	1749.16	258.243	161.748	527.952	2892.25	15.1015	18.789	147.685	455.62	29.6891	10.6096	4.50984	-1.50777	1080.59	5011.9	318.285	13.968	301.458	17.8169
7100802501	PSP	45.7005	-76.3996	B	64	32	4	185	C	Coniferous	Marine and littoral	Thick	Moderately well drained	2	1	1	1a	59.7413	119.207	194.21	1883.08	259.857	169.727	491.539	2897.7	15.4287	19.4266	141.65	470.354	26.1208	10.8231	5.04263	-0.775994	911.72	4819.35	238.077	13.7568	270.153	17.8505
7100802501	PSP	45.7005	-76.3996	C	94	4	2	185	C	Coniferous	Marine and littoral	Thick	Moderately well drained	2	1	1	1a	59.7413	119.207	194.21	1883.08	259.857	169.727	491.539	2897.7	15.4287	19.4266	141.65	470.354	26.1208	10.8231	5.04263	-0.775994	911.72	4819.35	238.077	13.7568	270.153	17.8505
7100802502	PSP	45.7019	-76.3942	B	80	19	1	184	F	Mixed	Glacial without particular morphology	Medium	Well drained	2	1	1	1a	59.7413	119.207	194.21	1883.08	259.857	169.727	491.539	2897.7	15.4287	19.4266	141.65	470.354	26.1208	10.8231	5.04263	-0.775994	911.72	4819.35	238.077	13.7568	270.153	17.8505
7100802502	PSP	45.7019	-76.3942	C	74	24	2	184	F	Mixed	Glacial without particular morphology	Medium	Well drained	2	1	1	1a	59.7413	119.207	194.21	1883.08	259.857	169.727	491.539	2897.7	15.4287	19.4266	141.65	470.354	26.1208	10.8231	5.04263	-0.775994	911.72	4819.35	238.077	13.7568	270.153	17.8505
7100802601	PSP	45.7003	-76.5336	B	66	26	8	160	F	Mixed	Fluvial	Thick	Moderately well drained	2	1	1	1a	65.8651	121.501	194.649	1884.12	260.514	170.439	480.718	2918.27	15.4188	19.4615	140.02	470.587	27.0336	10.7592	5.02953	-0.716781	901.004	4829.33	243.377	13.7685	263.98	17.8311
7100802601	PSP	45.7003	-76.5336	B	82	10	8	160	F	Mixed	Fluvial	Thick	Moderately well drained	2	1	1	1a	65.8651	121.501	194.649	1884.12	260.514	170.439	480.718	2918.27	15.4188	19.4615	140.02	470.587	27.0336	10.7592	5.02953	-0.716781	901.004	4829.33	243.377	13.7685	263.98	17.8311
7100802601	PSP	45.7003	-76.5336	C	28	38	34	160	F	Mixed	Fluvial	Thick	Moderately well drained	2	1	1	1a	65.8651	121.501	194.649	1884.12	260.514	170.439	480.718	2918.27	15.4188	19.4615	140.02	470.587	27.0336	10.7592	5.02953	-0.716781	901.004	4829.33	243.377	13.7685	263.98	17.8311
7100802601	PSP	45.7003	-76.5336	C	82	10	8	160	F	Mixed	Fluvial	Thick	Moderately well drained	2	1	1	1a	65.8651	121.501	194.649	1884.12	260.514	170.439	480.718	2918.27	15.4188	19.4615	140.02	470.587	27.0336	10.7592	5.02953	-0.716781	901.004	4829.33	243.377	13.7685	263.98	17.8311
7100802602	PSP	45.7016	-76.5387	B	4	34	62	158	F	Mixed	Marine and littoral	Thick	Somewhat excessively drained	2	1	1	1a	65.1147	120.325	192.98	1872.1	260.199	168.946	477.51	2904.99	15.4223	19.4482	140.87	468.668	27.3833	10.7557	4.9545	-0.820451	908.317	4846.51	248.721	13.7984	264.321	17.8617
7100802701	PSP	45.7004	-76.6665	B	16	42	42	151	A	Deciduous	Marine and littoral	Thick	Somewhat poorly drained	3	1	1	1a	72.6785	125.187	196.12	1912.73	262.737	172.765	466.908	2946.63	15.4834	19.8363	138.552	473.647	27.4959	10.8519	5.13646	-0.605621	872.407	4809.58	239.648	13.7887	250.218	17.9986
7100802701	PSP	45.7004	-76.6665	C	6	41	53	151	A	Deciduous	Marine and littoral	Thick	Somewhat poorly drained	3	1	1	1a	72.6785	125.187	196.12	1912.73	262.737	172.765	466.908	2946.63	15.4834	19.8363	138.552	473.647	27.4959	10.8519	5.13646	-0.605621	872.407	4809.58	239.648	13.7887	250.218	17.9986
7100802702	PSP	45.7036	-76.6633	B	16	48	36	154	A	Mixed	Marine and littoral	Medium	Somewhat poorly drained	6	1	1	1a	72.6785	125.187	196.12	1912.73	262.737	172.765	466.908	2946.63	15.4834	19.8363	138.552	473.647	27.4959	10.8519	5.13646	-0.605621	872.407	4809.58	239.648	13.7887	250.218	17.9986
7100802702	PSP	45.7036	-76.6633	C	9	38	53	154	A	Mixed	Marine and littoral	Medium	Somewhat poorly drained	6	1	1	1a	72.6785	125.187	196.12	1912.73	262.737	172.765	466.908	2946.63	15.4834	19.8363	138.552	473.647	27.4959	10.8519	5.13646	-0.605621	872.407	4809.58	239.648	13.7887	250.218	17.9986
7100802802	PSP	45.7132	-76.1126	B	71	25	4	210	F	Mixed	Glacial without particular morphology	Thin to very thin	Well drained	2	2	2west	2a	54.589	119.977	192.301	1838.13	260.968	169.39	515.323	2948.36	15.2472	19.366	141.993	465.97	28.4815	10.8105	4.92895	-0.950478	1000.78	4910.75	284.146	13.6309	281.913	17.579
7100802901	PSP	45.7174	-76.2662	B	56	37	7	270	F	Mixed	Glacial without particular morphology	Medium	Well drained	2	2	2west	2a	55.2529	117.39	189.651	1778.78	259.46	165.913	497.313	2900.25	15.0691	18.9751	143.069	458.515	29.3087	10.3852	4.60208	-1.13193	984.658	4927.65	288.704	13.3852	279.616	17.1625
7100802901	PSP	45.7174	-76.2662	C	80	16	4	270	F	Mixed	Glacial without particular morphology	Medium	Well drained	2	2	2west	2a	55.2529	117.39	189.651	1778.78	259.46	165.913	497.313	2900.25	15.0691	18.9751	143.069	458.515	29.3087	10.3852	4.60208	-1.13193	984.658	4927.65	288.704	13.3852	279.616	17.1625
7100802902	PSP	45.7176	-76.2724	B	52	40	8	270	D	Mixed	Glacial without particular morphology	Medium	Well drained	2	2	2west	2a	60.052	118.097	189.92	1789.33	259.721	165.825	479.01	2893.03	15.1295	19.0143	142.625	459.727	29.2469	10.4289	4.64384	-1.07916	952.522	4913.69	280.243	13.4156	271.279	17.2357
7100802902	PSP	45.7176	-76.2724	C	86	10	4	270	D	Mixed	Glacial without particular morphology	Medium	Well drained	2	2	2west	2a	60.052	118.097	189.92	1789.33	259.721	165.825	479.01	2893.03	15.1295	19.0143	142.625	459.727	29.2469	10.4289	4.64384	-1.07916	952.522	4913.69	280.243	13.4156	271.279	17.2357
7100803001	PSP	45.7175	-76.4499	B	84	14	2	210	B	Deciduous	Marine and littoral	Thick	Well drained	1	2	2west	2a	57.5077	118.547	193.574	1873.93	259.714	169.47	498.401	2893.83	15.3944	19.3879	142.168	469.11	26.3489	10.7671	4.99256	-0.859865	925.775	4825.73	242.545	13.8381	274.07	17.9296
7100803001	PSP	45.7175	-76.4499	B	86	9	5	210	B	Deciduous	Marine and littoral	Thick	Well drained	1	2	2west	2a	57.5077	118.547	193.574	1873.93	259.714	169.47	498.401	2893.83	15.3944	19.3879	142.168	469.11	26.3489	10.7671	4.99256	-0.859865	925.775	4825.73	242.545	13.8381	274.07	17.9296
7100803001	PSP	45.7175	-76.4499	C	86	12	2	210	B	Deciduous	Marine and littoral	Thick	Well drained	1	2	2west	2a	57.5077	118.547	193.574	1873.93	259.714	169.47	498.401	2893.83	15.3944	19.3879	142.168	469.11	26.3489	10.7671	4.99256	-0.859865	925.775	4825.73	242.545	13.8381	274.07	17.9296
7100803001	PSP	45.7175	-76.4499	C	90	6	4	210	B	Deciduous	Marine and littoral	Thick	Well drained	1	2	2west	2a	57.5077	118.547	193.574	1873.93	259.714	169.47	498.401	2893.83	15.3944	19.3879	142.168	469.11	26.3489	10.7671	4.99256	-0.859865	925.775	4825.73	242.545	13.8381	274.07	17.9296
7100803002	PSP	45.7142	-76.4466	B	62	35	3	194	E	Deciduous	Marine and littoral	Thick	Well drained	2	1	1	1a	58.3647	118.583	193.695	1882.6	259.638	168.924	495.703	2876.12	15.4535	19.4004	142.057	470.301	25.2999	10.8706	5.03778	-0.821498	909.239	4810.18	228.795	13.8989	276.324	18.0418
7100803002	PSP	45.7142	-76.4466	C	70	29	1	194	E	Deciduous	Marine and littoral	Thick	Well drained	2	1	1	1a	58.3647	118.583	193.695	1882.6	259.638	168.924	495.703	2876.12	15.4535	19.4004	142.057	470.301	25.2999	10.8706	5.03778	-0.821498	909.239	4810.18	228.795	13.8989	276.324	18.0418
7100803101	PSP	45.7172	-76.4829	B	38	57	5	188	C	Mixed	Proglacial	Thick	Moderately well drained	2	1	1	1a	59.8033	119.29	193.294	1875.62	259.688	168.928	490.724	2892.1	15.4301	19.3765	141.395	469.197	26.3967	10.8061	4.99272	-0.805252	914.203	4827.42	240.963	13.8381	271.415	17.9222
7100803101	PSP	45.7172	-76.4829	B	40	55	5	188	C	Mixed	Proglacial	Thick	Moderately well drained	2	1	1	1a	59.8033	119.29	193.294	1875.62	259.688	168.928	490.724	2892.1	15.4301	19.3765	141.395	469.197	26.3967	10.8061	4.99272	-0.805252	914.203	4827.42	240.963	13.8381	271.415	17.9222
7100803101	PSP	45.7172	-76.4829	C	44	52	4	188	C	Mixed	Proglacial	Thick	Moderately well drained	2	1	1	1a	59.8033	119.29	193.294	1875.62	259.688	168.928	490.724	2892.1	15.4301	19.3765	141.395	469.197	26.3967	10.8061	4.99272	-0.805252	914.203	4827.42	240.963	13.8381	271.415	17.9222
7100803102	PSP	45.7206	-76.4859	B	54	43	3	189	A	Mixed	Proglacial	Thick	Moderately well drained	2	1	1	1a	61.7198	119.978	193.936	1887.07	259.88	169.585	488.041	2898.98	15.4612	19.4539	140.899	470.571	26.3092	10.8463	5.04164	-0.757828	906.313	4820.9	237.897	13.8546	269.089	17.9767
7100803102	PSP	45.7206	-76.4859	C	98	2	0	189	A	Mixed	Proglacial	Thick	Moderately well drained	2	1	1	1a	61.7198	119.978	193.936	1887.07	259.88	169.585	488.041	2898.98	15.4612	19.4539	140.899	470.571	26.3092	10.8463	5.04164	-0.757828	906.313	4820.9	237.897	13.8546	269.089	17.9767
7100803201	PSP	45.7331	-76.0656	B	50	45	5	310	D	Deciduous	Glacial without particular morphology	Medium	Moderately well drained	2	2	2west	2a	44.4355	106.087	181.823	1682.02	256.366	158.525	511.292	2869.61	14.88	18.505	151.28	447.78	30.6202	10.3244	4.19279	-1.9478	1070.06	5061.37	326.419	14.0217	298.78	17.6899
7100803201	PSP	45.7331	-76.0656	C	73	26	1	310	D	Deciduous	Glacial without particular morphology	Medium	Moderately well drained	2	2	2west	2a	44.4355	106.087	181.823	1682.02	256.366	158.525	511.292	2869.61	14.88	18.505	151.28	447.78	30.6202	10.3244	4.19279	-1.9478	1070.06	5061.37	326.419	14.0217	298.78	17.6899
7100803202	PSP	45.7316	-76.0603	B	55	40	5	347	C	Deciduous	Glacial without particular morphology	Medium	Well drained	2	2	2west	2a	44.4355	106.087	181.823	1682.02	256.366	158.525	511.292	2869.61	14.88	18.505	151.28	447.78	30.6202	10.3244	4.19279	-1.9478	1070.06	5061.37	326.419	14.0217	298.78	17.6899
7100803301	PSP	45.7508	-75.8823	B	75	18	7	321	F	Deciduous	Glacial without particular morphology	Medium	Well drained	2	2	2west	2a	38.4195	117.12	183.7	1661.35	261.718	162.215	540.622	2880.19	14.6564	18.5083	145.587	444.716	30.2436	9.86369	4.08994	-1.70809	1070.6	5017.97	322.539	13.2125	312.953	16.6199
7100803302	PSP	45.7539	-75.8787	B	66	29	5	360	C	Deciduous	Glacial without particular morphology	Thick	Moderately well drained	2	2	2west	2a	38.4195	117.12	183.7	1661.35	261.718	162.215	540.622	2880.19	14.6564	18.5083	145.587	444.716	30.2436	9.86369	4.08994	-1.70809	1070.6	5017.97	322.539	13.2125	312.953	16.6199
7100803302	PSP	45.7539	-75.8787	C	58	32	10	360	C	Deciduous	Glacial without particular morphology	Thick	Moderately well drained	2	2	2west	2a	38.4195	117.12	183.7	1661.35	261.718	162.215	540.622	2880.19	14.6564	18.5083	145.587	444.716	30.2436	9.86369	4.08994	-1.70809	1070.6	5017.97	322.539	13.2125	312.953	16.6199
7100803401	PSP	45.7664	-76.2825	B	68	28	4	258	B	Coniferous	Glacial without particular morphology	Medium	Well drained	2	2	2west	2a	48.7716	110.002	183.723	1689.86	257.082	159.747	491.963	2841.96	14.8622	18.495	148.078	447.712	30.43	10.029	4.14994	-1.62117	1016.56	4994.86	309.396	13.3868	288.933	16.9538
7100803401	PSP	45.7664	-76.2825	C	67	31	2	258	B	Coniferous	Glacial without particular morphology	Medium	Well drained	2	2	2west	2a	48.7716	110.002	183.723	1689.86	257.082	159.747	491.963	2841.96	14.8622	18.495	148.078	447.712	30.43	10.029	4.14994	-1.62117	1016.56	4994.86	309.396	13.3868	288.933	16.9538
7100803402	PSP	45.7694	-76.2854	B	78	20	2	258	D	Deciduous	Glacial without particular morphology	Medium	Well drained	2	2	2west	2a	59.3891	121.346	193.036	1842.84	260.64	169.049	496.764	2917.29	15.2691	19.2751	140.295	466.046	29.0959	10.6314	4.87861	-0.941391	974.862	4877.42	283.311	13.5298	271.964	17.4252
7100803402	PSP	45.7694	-76.2854	C	72	25	3	258	D	Deciduous	Glacial without particular morphology	Medium	Well drained	2	2	2west	2a	59.3891	121.346	193.036	1842.84	260.64	169.049	496.764	2917.29	15.2691	19.2751	140.295	466.046	29.0959	10.6314	4.87861	-0.941391	974.862	4877.42	283.311	13.5298	271.964	17.4252
7100803501	PSP	45.783	-75.9328	B	60	30	10	170	C	Deciduous	Marine and littoral	Thick	Well drained	2	2	2west	2a	55.5008	131.368	197.623	1900.1	266.865	177.219	539.528	2998.96	15.2566	19.7306	136.5	473.51	27.556	10.887	5.22029	-0.428262	986.635	4834.41	270.765	13.2248	284.753	17.1141
7100803501	PSP	45.783	-75.9328	B	80	13	7	170	C	Deciduous	Marine and littoral	Thick	Well drained	2	2	2west	2a	55.5008	131.368	197.623	1900.1	266.865	177.219	539.528	2998.96	15.2566	19.7306	136.5	473.51	27.556	10.887	5.22029	-0.428262	986.635	4834.41	270.765	13.2248	284.753	17.1141
7100803501	PSP	45.783	-75.9328	B	80	13	7	170	C	Deciduous	Marine and littoral	Thick	Well drained	2	2	2west	2a	55.5008	131.368	197.623	1900.1	266.865	177.219	539.528	2998.96	15.2566	19.7306	136.5	473.51	27.556	10.887	5.22029	-0.428262	986.635	4834.41	270.765	13.2248	284.753	17.1141
7100803501	PSP	45.783	-75.9328	C	54	34	12	170	C	Deciduous	Marine and littoral	Thick	Well drained	2	2	2west	2a	55.5008	131.368	197.623	1900.1	266.865	177.219	539.528	2998.96	15.2566	19.7306	136.5	473.51	27.556	10.887	5.22029	-0.428262	986.635	4834.41	270.765	13.2248	284.753	17.1141
7100803501	PSP	45.783	-75.9328	C	65	27	9	170	C	Deciduous	Marine and littoral	Thick	Well drained	2	2	2west	2a	55.5008	131.368	197.623	1900.1	266.865	177.219	539.528	2998.96	15.2566	19.7306	136.5	473.51	27.556	10.887	5.22029	-0.428262	986.635	4834.41	270.765	13.2248	284.753	17.1141
7100803502	PSP	45.7869	-75.9325	B	50	34	16	179	D	Deciduous	Marine and littoral	Thick	Well drained	2	2	2west	2a	50.1882	128.105	193.753	1833.96	265.954	172.962	539.167	2958.49	15.0983	19.2985	138.842	465.54	28.3233	10.6311	4.91519	-0.855722	1009.95	4880.95	285.178	13.2542	293.011	17.0063
7100803502	PSP	45.7869	-75.9325	C	78	16	6	179	D	Deciduous	Marine and littoral	Thick	Well drained	2	2	2west	2a	50.1882	128.105	193.753	1833.96	265.954	172.962	539.167	2958.49	15.0983	19.2985	138.842	465.54	28.3233	10.6311	4.91519	-0.855722	1009.95	4880.95	285.178	13.2542	293.011	17.0063
7100803601	PSP	45.7826	-75.9864	B	48	47	5	202	B	Coniferous	Glacial without particular morphology	Medium	Moderately well drained	2	2	2west	2a	50.5242	118.617	191.022	1820.96	260.984	169.211	527.829	2937.92	15.1643	19.2428	143.367	463.946	28.3218	10.7517	4.83237	-1.13388	1013.13	4905.62	285.626	13.752	291.046	17.6116
7100803601	PSP	45.7826	-75.9864	C	76	20	4	202	B	Coniferous	Glacial without particular morphology	Medium	Moderately well drained	2	2	2west	2a	50.5242	118.617	191.022	1820.96	260.984	169.211	527.829	2937.92	15.1643	19.2428	143.367	463.946	28.3218	10.7517	4.83237	-1.13388	1013.13	4905.62	285.626	13.752	291.046	17.6116
7100803602	PSP	45.7837	-75.9812	B	31	61	8	186	E	Deciduous	Glacial without particular morphology	Thin	Well drained	2	2	2west	2a	50.6628	119.197	191.088	1821.62	261.221	169.296	529.324	2940.89	15.169	19.294	143.023	464.015	28.317	10.7497	4.83017	-1.08454	1015.81	4904.13	286.568	13.7001	291.909	17.5803
7100803701	PSP	45.7822	-76.1836	B	66	30	4	335	D	Deciduous	Glacial without particular morphology	Medium	Moderately well drained	2	2	2west	2a	46.0776	102.863	180.873	1674.84	254.236	155.304	486.75	2794.45	14.9603	18.4084	152.358	446.261	30.3564	10.1996	4.10232	-1.89221	1026.63	5018.66	310.937	13.957	289.31	17.7163
7100803701	PSP	45.7822	-76.1836	C	78	20	2	335	D	Deciduous	Glacial without particular morphology	Medium	Moderately well drained	2	2	2west	2a	46.0776	102.863	180.873	1674.84	254.236	155.304	486.75	2794.45	14.9603	18.4084	152.358	446.261	30.3564	10.1996	4.10232	-1.89221	1026.63	5018.66	310.937	13.957	289.31	17.7163
7100803801	PSP	45.7826	-76.4676	B	52	47	1	263	D	Mixed	Glacial without particular morphology	Medium	Moderately well drained	2	2	2west	2a	60.922	120.451	193.155	1859.18	260.541	168.948	488.876	2896.77	15.3458	19.284	141.091	467.399	27.824	10.6693	4.92779	-0.879581	941.113	4847.93	261.37	13.6873	269.288	17.6884
7100803801	PSP	45.7826	-76.4676	C	72	26	2	263	D	Mixed	Glacial without particular morphology	Medium	Moderately well drained	2	2	2west	2a	60.922	120.451	193.155	1859.18	260.541	168.948	488.876	2896.77	15.3458	19.284	141.091	467.399	27.824	10.6693	4.92779	-0.879581	941.113	4847.93	261.37	13.6873	269.288	17.6884
7100803901	PSP	45.7828	-76.5837	B	72	26	2	180	A	Mixed	Fluvial	Thick	Very poorly drained	8	1	1	1a	64.5959	120.356	193.259	1868.09	260.447	169.074	477.201	2904.22	15.3931	19.4486	141.088	468.297	28.0819	10.7258	4.93511	-0.843181	916.627	4844.31	256.784	13.8292	261.54	17.9571
7100803901	PSP	45.7828	-76.5837	C	95	4	1	180	A	Mixed	Fluvial	Thick	Very poorly drained	8	1	1	1a	64.5959	120.356	193.259	1868.09	260.447	169.074	477.201	2904.22	15.3931	19.4486	141.088	468.297	28.0819	10.7258	4.93511	-0.843181	916.627	4844.31	256.784	13.8292	261.54	17.9571
7100803902	PSP	45.784	-76.5779	B	40	56	4	195	C	Deciduous	Glacial without particular morphology	Thin	Well drained	2	3	3west	3a	62.095	119.398	192.659	1846.73	260.149	168.561	482.248	2903.95	15.3064	19.2897	141.75	465.751	28.3752	10.596	4.84505	-0.914725	931.73	4853.76	263.981	13.7526	265.963	17.8072
7100804001	PSP	45.7992	-76.5823	B	41	53	6	291	B	Deciduous	Bedrock	Very thin or absent	Well drained	2	3	3west	3a	60.7991	118.92	191.725	1837.38	259.944	167.546	482.106	2894.16	15.3093	19.2314	142.025	464.362	28.6426	10.5538	4.8113	-0.945504	939.124	4861.65	268.148	13.6998	266.938	17.6833
7100804002	PSP	45.8024	-76.5856	B	26	70	4	295	B	Deciduous	Glacial without particular morphology	Medium	Moderately well drained	2	3	3west	3a	56.99	116.307	188.05	1779.82	259.087	164.02	480.802	2860.12	15.1787	18.9274	143.783	457.414	29.8687	10.3307	4.56211	-1.13858	964.477	4906.66	287.946	13.5629	271.08	17.3755
7100804002	PSP	45.8024	-76.5856	C	56	40	4	295	B	Deciduous	Glacial without particular morphology	Medium	Moderately well drained	2	3	3west	3a	56.99	116.307	188.05	1779.82	259.087	164.02	480.802	2860.12	15.1787	18.9274	143.783	457.414	29.8687	10.3307	4.56211	-1.13858	964.477	4906.66	287.946	13.5629	271.08	17.3755
7100804101	PSP	45.8163	-75.8995	B	28	39	33	162	D	Deciduous	Lacustrine	Medium	Moderately well drained	3	2	2west	2a	45.9826	128.722	193.371	1811.33	266.481	170.937	535.654	2923.13	15.073	19.1892	138.756	462.845	28.5776	10.4076	4.80522	-1.04682	1019.46	4883.89	291.082	13.1857	298.25	16.7181
7100804102	PSP	45.8175	-75.8945	B	25	61	14	235	C	Coniferous	Glacial without particular morphology	Thin	Well drained	2	2	2west	2a	53.5852	131.951	196.612	1885.9	267.407	174.611	529.382	2954.31	15.2933	19.5644	136.464	471.757	27.6013	10.819	5.13443	-0.448035	978.563	4823.68	268.867	13.1493	285.712	16.9541
7100804201	PSP	45.8158	-76.5829	B	50	45	5	311	D	Deciduous	Glacial without particular morphology	Medium	Moderately well drained	2	3	3west	3a	56.1971	115.604	188.265	1770.19	258.786	164.402	483.82	2863.7	15.0986	18.8359	144.184	456.102	30.049	10.2302	4.50523	-1.20362	972.565	4901.83	291.71	13.5232	271.697	17.2819
7100804202	PSP	45.8124	-76.5798	B	38	60	2	311	C	Deciduous	Glacial without particular morphology	Medium	Moderately well drained	2	3	3west	3a	56.1971	115.604	188.265	1770.19	258.786	164.402	483.82	2863.7	15.0986	18.8359	144.184	456.102	30.049	10.2302	4.50523	-1.20362	972.565	4901.83	291.71	13.5232	271.697	17.2819
7100804202	PSP	45.8124	-76.5798	C	76	20	4	311	C	Deciduous	Glacial without particular morphology	Medium	Moderately well drained	2	3	3west	3a	56.1971	115.604	188.265	1770.19	258.786	164.402	483.82	2863.7	15.0986	18.8359	144.184	456.102	30.049	10.2302	4.50523	-1.20362	972.565	4901.83	291.71	13.5232	271.697	17.2819
7100804301	PSP	45.8165	-76.7503	B	44	56	0	110	A	Coniferous	Fluvial	Thick	Poorly drained	8	1	1	1a	72.1006	126.95	198.389	1959.87	264.162	175.19	481.799	2961.87	15.6129	20.1018	138.213	479.324	27.331	11.0533	5.31959	-0.417354	890.589	4781.83	242.576	13.9641	253.008	18.4651
7100804301	PSP	45.8165	-76.7503	C	36	45	19	110	A	Coniferous	Fluvial	Thick	Poorly drained	8	1	1	1a	72.1006	126.95	198.389	1959.87	264.162	175.19	481.799	2961.87	15.6129	20.1018	138.213	479.324	27.331	11.0533	5.31959	-0.417354	890.589	4781.83	242.576	13.9641	253.008	18.4651
7100804401	PSP	45.8339	-76.2322	B	62	35	3	242	C	Coniferous	Glacial without particular morphology	Thick	Moderately well drained	2	2	2west	2a	52.813	109.29	186.471	1765.11	256.712	162.24	489.733	2856.14	15.1399	18.8371	148.422	456.789	29.7842	10.5337	4.49112	-1.54446	999.049	4943.93	296.904	13.9822	281.219	17.8457
7100804401	PSP	45.8339	-76.2322	C	85	13	2	242	C	Coniferous	Glacial without particular morphology	Thick	Moderately well drained	2	2	2west	2a	52.813	109.29	186.471	1765.11	256.712	162.24	489.733	2856.14	15.1399	18.8371	148.422	456.789	29.7842	10.5337	4.49112	-1.54446	999.049	4943.93	296.904	13.9822	281.219	17.8457
7100804402	PSP	45.8333	-76.2268	B	50	44	6	220	A	Coniferous	Proglacial	Thick	Poorly drained	2	2	2west	2a	54.4117	110.721	187.472	1783.66	257.075	163.26	489.366	2865.92	15.1929	18.9205	147.352	459.075	29.6101	10.6367	4.5841	-1.43819	992.354	4931.36	293.1	14.013	279.954	17.9246
7100804402	PSP	45.8333	-76.2268	B	68	25	7	220	A	Coniferous	Proglacial	Thick	Poorly drained	2	2	2west	2a	54.4117	110.721	187.472	1783.66	257.075	163.26	489.366	2865.92	15.1929	18.9205	147.352	459.075	29.6101	10.6367	4.5841	-1.43819	992.354	4931.36	293.1	14.013	279.954	17.9246
7100804402	PSP	45.8333	-76.2268	B	68	25	7	220	A	Coniferous	Proglacial	Thick	Poorly drained	2	2	2west	2a	54.4117	110.721	187.472	1783.66	257.075	163.26	489.366	2865.92	15.1929	18.9205	147.352	459.075	29.6101	10.6367	4.5841	-1.43819	992.354	4931.36	293.1	14.013	279.954	17.9246
7100804402	PSP	45.8333	-76.2268	C	84	16	0	220	A	Coniferous	Proglacial	Thick	Poorly drained	2	2	2west	2a	54.4117	110.721	187.472	1783.66	257.075	163.26	489.366	2865.92	15.1929	18.9205	147.352	459.075	29.6101	10.6367	4.5841	-1.43819	992.354	4931.36	293.1	14.013	279.954	17.9246
7100804501	PSP	45.8334	-76.3325	B	73	21	6	220	B	Coniferous	Glacial without particular morphology	Thick	Somewhat poorly drained	2	3	3west	3a	59.4648	119.959	191.805	1832.61	260.127	168.122	493.008	2918	15.2575	19.2443	141.171	464.673	30.2718	10.5993	4.78307	-1.0695	998.267	4905.03	301.618	13.7044	271.035	17.6746
7100804501	PSP	45.8334	-76.3325	C	76	19	5	220	B	Coniferous	Glacial without particular morphology	Thick	Somewhat poorly drained	2	3	3west	3a	59.4648	119.959	191.805	1832.61	260.127	168.122	493.008	2918	15.2575	19.2443	141.171	464.673	30.2718	10.5993	4.78307	-1.0695	998.267	4905.03	301.618	13.7044	271.035	17.6746
7100804601	PSP	45.8335	-76.7157	B	95	2	3	110	A	Deciduous	Fluvial	Thick	Somewhat poorly drained	4	1	1	1a	69.3738	125.492	197.595	1944.06	263.332	173.932	484.957	2952.73	15.5854	19.9843	138.84	477.452	27.807	10.9985	5.24919	-0.498459	911.384	4793.84	252.788	13.9388	256.512	18.39
7100804601	PSP	45.8335	-76.7157	C	95	1	4	110	A	Deciduous	Fluvial	Thick	Somewhat poorly drained	4	1	1	1a	69.3738	125.492	197.595	1944.06	263.332	173.932	484.957	2952.73	15.5854	19.9843	138.84	477.452	27.807	10.9985	5.24919	-0.498459	911.384	4793.84	252.788	13.9388	256.512	18.39
7100804601	PSP	45.8335	-76.7157	C	99	0	1	110	A	Deciduous	Fluvial	Thick	Somewhat poorly drained	4	1	1	1a	69.3738	125.492	197.595	1944.06	263.332	173.932	484.957	2952.73	15.5854	19.9843	138.84	477.452	27.807	10.9985	5.24919	-0.498459	911.384	4793.84	252.788	13.9388	256.512	18.39
7100804602	PSP	45.8365	-76.719	B	26	60	14	108	A	Deciduous	Fluvial	Thick	Poorly drained	6	1	1	1a	68.5938	125.078	197.017	1942.43	263.155	173.569	485.056	2949.56	15.5925	19.9403	139.076	477.227	27.8477	11.0082	5.23042	-0.53963	913.359	4802.72	253.459	13.954	257.372	18.3884
7100804602	PSP	45.8365	-76.719	C	16	59	25	108	A	Deciduous	Fluvial	Thick	Poorly drained	6	1	1	1a	68.5938	125.078	197.017	1942.43	263.155	173.569	485.056	2949.56	15.5925	19.9403	139.076	477.227	27.8477	11.0082	5.23042	-0.53963	913.359	4802.72	253.459	13.954	257.372	18.3884
7100804701	PSP	45.8494	-76.3838	B	64	34	2	243	E	Deciduous	Glacial without particular morphology	Medium	Well drained	2	3	3west	3a	57.6597	117.04	189.074	1795.75	259.326	165.587	490.225	2894.9	15.181	19.0521	143.287	459.858	31.3859	10.4132	4.59126	-1.2158	1021.35	4942.46	319.933	13.6215	272.259	17.4366
7100804701	PSP	45.8494	-76.3838	C	76	21	3	243	E	Deciduous	Glacial without particular morphology	Medium	Well drained	2	3	3west	3a	57.6597	117.04	189.074	1795.75	259.326	165.587	490.225	2894.9	15.181	19.0521	143.287	459.858	31.3859	10.4132	4.59126	-1.2158	1021.35	4942.46	319.933	13.6215	272.259	17.4366
7100804702	PSP	45.8507	-76.3891	B	74	19	7	249	B	Deciduous	Glacial without particular morphology	Thick	Moderately well drained	2	3	3west	3a	59.5256	119.182	190.844	1822.87	260.067	167.176	491.342	2903.59	15.2514	19.1873	141.885	463.235	30.7253	10.5343	4.72237	-1.09987	1008.14	4914.77	308.579	13.6408	270.691	17.497
7100804702	PSP	45.8507	-76.3891	C	70	25	5	249	B	Deciduous	Glacial without particular morphology	Thick	Moderately well drained	2	3	3west	3a	59.5256	119.182	190.844	1822.87	260.067	167.176	491.342	2903.59	15.2514	19.1873	141.885	463.235	30.7253	10.5343	4.72237	-1.09987	1008.14	4914.77	308.579	13.6408	270.691	17.497
7100804801	PSP	45.8497	-76.9662	B	82	12	6	129	A	Deciduous	Marine and littoral	Thick	Moderately well drained	1	1	1	1a	68.7384	130.973	198.363	1972.52	266.028	174.988	494.826	2940.43	15.6978	19.997	136.055	481.424	27.4164	11.2488	5.47601	-0.294785	920.708	4796.56	251.618	14.1347	262.276	18.4026
7100804801	PSP	45.8497	-76.9662	B	93	3	4	129	A	Deciduous	Marine and littoral	Thick	Moderately well drained	1	1	1	1a	68.7384	130.973	198.363	1972.52	266.028	174.988	494.826	2940.43	15.6978	19.997	136.055	481.424	27.4164	11.2488	5.47601	-0.294785	920.708	4796.56	251.618	14.1347	262.276	18.4026
7100804801	PSP	45.8497	-76.9662	B	93	3	4	129	A	Deciduous	Marine and littoral	Thick	Moderately well drained	1	1	1	1a	68.7384	130.973	198.363	1972.52	266.028	174.988	494.826	2940.43	15.6978	19.997	136.055	481.424	27.4164	11.2488	5.47601	-0.294785	920.708	4796.56	251.618	14.1347	262.276	18.4026
7100804801	PSP	45.8497	-76.9662	C	96	3	1	129	A	Deciduous	Marine and littoral	Thick	Moderately well drained	1	1	1	1a	68.7384	130.973	198.363	1972.52	266.028	174.988	494.826	2940.43	15.6978	19.997	136.055	481.424	27.4164	11.2488	5.47601	-0.294785	920.708	4796.56	251.618	14.1347	262.276	18.4026
7100804802	PSP	45.8529	-76.9629	B	86	12	2	131	C	Deciduous	Marine and littoral	Thick	Moderately well drained	2	1	1	1a	68.7139	130.976	198.169	1969.75	266.05	174.937	494.568	2938.39	15.6854	19.909	136.074	481.162	27.3573	11.2422	5.46134	-0.290456	919.27	4797.2	250.088	14.1206	261.476	18.3699
7100804802	PSP	45.8529	-76.9629	B	91	4	5	131	C	Deciduous	Marine and littoral	Thick	Moderately well drained	2	1	1	1a	68.7139	130.976	198.169	1969.75	266.05	174.937	494.568	2938.39	15.6854	19.909	136.074	481.162	27.3573	11.2422	5.46134	-0.290456	919.27	4797.2	250.088	14.1206	261.476	18.3699
7100804802	PSP	45.8529	-76.9629	B	91	4	5	131	C	Deciduous	Marine and littoral	Thick	Moderately well drained	2	1	1	1a	68.7139	130.976	198.169	1969.75	266.05	174.937	494.568	2938.39	15.6854	19.909	136.074	481.162	27.3573	11.2422	5.46134	-0.290456	919.27	4797.2	250.088	14.1206	261.476	18.3699
7100804802	PSP	45.8529	-76.9629	C	69	28	3	131	C	Deciduous	Marine and littoral	Thick	Moderately well drained	2	1	1	1a	68.7139	130.976	198.169	1969.75	266.05	174.937	494.568	2938.39	15.6854	19.909	136.074	481.162	27.3573	11.2422	5.46134	-0.290456	919.27	4797.2	250.088	14.1206	261.476	18.3699
7100804802	PSP	45.8529	-76.9629	C	88	8	4	131	C	Deciduous	Marine and littoral	Thick	Moderately well drained	2	1	1	1a	68.7139	130.976	198.169	1969.75	266.05	174.937	494.568	2938.39	15.6854	19.909	136.074	481.162	27.3573	11.2422	5.46134	-0.290456	919.27	4797.2	250.088	14.1206	261.476	18.3699
7100804901	PSP	45.8497	-77.0329	B	76	19	5	146	A	Mixed	Marine and littoral	Thick	Somewhat poorly drained	4	1	1	1a	67.2486	128.108	196.626	1945.19	264.696	172.782	482.649	2907.38	15.6494	19.7186	137.589	478.316	27.2083	11.187	5.39144	-0.403307	902.505	4806.74	244.942	14.1115	262.448	18.2352
7100804901	PSP	45.8497	-77.0329	C	97	3	0	146	A	Mixed	Marine and littoral	Thick	Somewhat poorly drained	4	1	1	1a	67.2486	128.108	196.626	1945.19	264.696	172.782	482.649	2907.38	15.6494	19.7186	137.589	478.316	27.2083	11.187	5.39144	-0.403307	902.505	4806.74	244.942	14.1115	262.448	18.2352
7100804902	PSP	45.8527	-77.0367	B	88	10	2	147	A	Deciduous	Marine and littoral	Thick	Somewhat poorly drained	5	1	1	1a	67.4029	127.653	196.245	1937.39	264.498	172.786	481.755	2912.57	15.6085	19.6991	137.843	477.47	27.2322	11.1671	5.34942	-0.402452	899.375	4810.45	244.346	14.1229	262.188	18.2664
7100804902	PSP	45.8527	-77.0367	C	95	5	0	147	A	Deciduous	Marine and littoral	Thick	Somewhat poorly drained	5	1	1	1a	67.4029	127.653	196.245	1937.39	264.498	172.786	481.755	2912.57	15.6085	19.6991	137.843	477.47	27.2322	11.1671	5.34942	-0.402452	899.375	4810.45	244.346	14.1229	262.188	18.2664
7100805001	PSP	45.8659	-76.6498	B	58	38	4	200	C	Deciduous	Glacial without particular morphology	Medium	Moderately well drained	2	3	3west	3a	58.9518	114.331	187.762	1787.65	258.569	163.874	474.913	2863.15	15.2055	19.0249	145.235	458.517	29.7781	10.4259	4.51764	-1.38842	955.777	4911.6	283.947	13.9225	268.467	17.8464
7100805002	PSP	45.8668	-76.6556	B	72	21	7	193	F	Deciduous	Glacial without particular morphology	Thin to very thin	Somewhat excessively drained	2	3	3west	3a	63.116	119.524	191.682	1855.39	260.3	167.811	479.338	2896.07	15.3958	19.4379	141.778	466.649	28.9549	10.6844	4.82662	-1.02711	938.927	4864.03	271.105	13.9754	264.757	18.0808
7100805002	PSP	45.8668	-76.6556	B	73	18	9	193	F	Deciduous	Glacial without particular morphology	Thin to very thin	Somewhat excessively drained	2	3	3west	3a	63.116	119.524	191.682	1855.39	260.3	167.811	479.338	2896.07	15.3958	19.4379	141.778	466.649	28.9549	10.6844	4.82662	-1.02711	938.927	4864.03	271.105	13.9754	264.757	18.0808
7100805002	PSP	45.8668	-76.6556	B	73	18	9	193	F	Deciduous	Glacial without particular morphology	Thin to very thin	Somewhat excessively drained	2	3	3west	3a	63.116	119.524	191.682	1855.39	260.3	167.811	479.338	2896.07	15.3958	19.4379	141.778	466.649	28.9549	10.6844	4.82662	-1.02711	938.927	4864.03	271.105	13.9754	264.757	18.0808
7100805101	PSP	45.8834	-76.0325	B	92	6	2	168	D	Non-forested	Slope and in situ weathered	Thick	Well drained	1	2	2west	2a	53.3245	122.99	193.423	1855.77	262.182	171.79	517.479	2936.94	15.2426	19.3355	140.191	467.695	27.9316	10.7956	4.9398	-0.91248	969.755	4844.65	269.969	13.6199	287.979	17.5137
7100805101	PSP	45.8834	-76.0325	C	94	5	1	168	D	Non-forested	Slope and in situ weathered	Thick	Well drained	1	2	2west	2a	53.3245	122.99	193.423	1855.77	262.182	171.79	517.479	2936.94	15.2426	19.3355	140.191	467.695	27.9316	10.7956	4.9398	-0.91248	969.755	4844.65	269.969	13.6199	287.979	17.5137
7100805102	PSP	45.8846	-76.0378	B	64	36	0	180	B	Mixed	Marine and littoral	Thick	Well drained	2	2	2west	2a	51.6397	122.559	193.114	1846.8	262.124	171.317	517.128	2922.92	15.2025	19.327	140.566	466.612	28.0508	10.7539	4.90136	-0.930775	979.871	4843.96	273.451	13.5971	287.667	17.4353
7100805102	PSP	45.8846	-76.0378	C	59	40	1	180	B	Mixed	Marine and littoral	Thick	Well drained	2	2	2west	2a	51.6397	122.559	193.114	1846.8	262.124	171.317	517.128	2922.92	15.2025	19.327	140.566	466.612	28.0508	10.7539	4.90136	-0.930775	979.871	4843.96	273.451	13.5971	287.667	17.4353
7100805201	PSP	45.8834	-76.3163	B	86	12	2	217	A	Coniferous	Proglacial	Thick	Moderately well drained	1	3	3west	3a	55.7253	112.457	187.686	1782.12	257.226	162.737	482.668	2858.14	15.2135	18.8866	145.77	458.486	30.3966	10.4878	4.524	-1.43685	998.815	4929.15	302.986	13.9329	274.747	17.8008
7100805201	PSP	45.8834	-76.3163	C	95	3	2	217	A	Coniferous	Proglacial	Thick	Moderately well drained	1	3	3west	3a	55.7253	112.457	187.686	1782.12	257.226	162.737	482.668	2858.14	15.2135	18.8866	145.77	458.486	30.3966	10.4878	4.524	-1.43685	998.815	4929.15	302.986	13.9329	274.747	17.8008
7100805201	PSP	45.8834	-76.3163	C	95	4	1	217	A	Coniferous	Proglacial	Thick	Moderately well drained	1	3	3west	3a	55.7253	112.457	187.686	1782.12	257.226	162.737	482.668	2858.14	15.2135	18.8866	145.77	458.486	30.3966	10.4878	4.524	-1.43685	998.815	4929.15	302.986	13.9329	274.747	17.8008
7100805202	PSP	45.8803	-76.3194	B	76	22	2	218	A	Mixed	Proglacial	Thick	Moderately well drained	1	3	3west	3a	56.2699	113.132	188.432	1791.79	257.412	163.486	483.701	2866.43	15.2297	18.9363	145.28	459.68	30.365	10.5084	4.56322	-1.39319	998.992	4924.01	302.644	13.9346	274.125	17.8168
7100805202	PSP	45.8803	-76.3194	C	97	3	0	218	A	Mixed	Proglacial	Thick	Moderately well drained	1	3	3west	3a	56.2699	113.132	188.432	1791.79	257.412	163.486	483.701	2866.43	15.2297	18.9363	145.28	459.68	30.365	10.5084	4.56322	-1.39319	998.992	4924.01	302.644	13.9346	274.125	17.8168
7100805302	PSP	45.8863	-76.4668	B	66	28	6	280	D	Deciduous	Glacial without particular morphology	Medium	Well drained	2	3	3west	3a	56.0721	116.153	187.952	1767.6	259.286	164.695	490.183	2884.45	15.0769	18.9706	144.138	456.424	31.5436	10.2576	4.44843	-1.34391	1018.92	4945.32	320.572	13.5341	273.991	17.3263
7100805401	PSP	45.8827	-76.7002	B	58	31	11	206	D	Deciduous	Glacial without particular morphology	Thin to very thin	Well drained	2	1	1	1a	61.7419	118.258	190.599	1833.26	260.168	167.01	479.615	2888.06	15.3105	19.3413	142.909	464.055	29.1714	10.5917	4.72679	-1.14249	942.904	4871.94	274.27	13.8528	265.674	17.8648
7100805402	PSP	45.8859	-76.7038	B	67	28	5	196	D	Deciduous	Glacial without particular morphology	Medium	Moderately well drained	2	1	1	1a	62.1989	119.112	191.518	1843.21	260.335	168.02	481.608	2897.35	15.318	19.3866	142.223	465.302	29.0803	10.5969	4.77243	-1.10315	941.155	4858.41	272.898	13.8538	264.841	17.8911
7100805402	PSP	45.8859	-76.7038	C	76	22	2	196	D	Deciduous	Glacial without particular morphology	Medium	Moderately well drained	2	1	1	1a	62.1989	119.112	191.518	1843.21	260.335	168.02	481.608	2897.35	15.318	19.3866	142.223	465.302	29.0803	10.5969	4.77243	-1.10315	941.155	4858.41	272.898	13.8538	264.841	17.8911
7100805501	PSP	45.9	-76.4002	B	75	22	3	268	B	Mixed	Glacial without particular morphology	Medium	Moderately well drained	2	3	3west	3a	53.8678	113.24	186.28	1740.43	258.311	162.842	487.808	2865.41	15.0044	18.7619	146.079	453.266	31.6127	10.177	4.32657	-1.53071	1022.03	4960.5	322.406	13.5395	276.453	17.1903
7100805501	PSP	45.9	-76.4002	C	78	18	4	268	B	Mixed	Glacial without particular morphology	Medium	Moderately well drained	2	3	3west	3a	53.8678	113.24	186.28	1740.43	258.311	162.842	487.808	2865.41	15.0044	18.7619	146.079	453.266	31.6127	10.177	4.32657	-1.53071	1022.03	4960.5	322.406	13.5395	276.453	17.1903
7100805502	PSP	45.9038	-76.3999	B	72	23	5	239	C	Deciduous	Glacial without particular morphology	Thick	Moderately well drained	1	3	3west	3a	55.6443	114.789	187.419	1759.55	258.622	163.002	485.897	2861.18	15.0874	18.837	144.835	455.945	31.2068	10.3196	4.42305	-1.39805	1016.22	4952.22	316.115	13.5618	274.61	17.3544
7100805502	PSP	45.9038	-76.3999	C	79	20	1	239	C	Deciduous	Glacial without particular morphology	Thick	Moderately well drained	1	3	3west	3a	55.6443	114.789	187.419	1759.55	258.622	163.002	485.897	2861.18	15.0874	18.837	144.835	455.945	31.2068	10.3196	4.42305	-1.39805	1016.22	4952.22	316.115	13.5618	274.61	17.3544
7100805601	PSP	45.8999	-77.1327	B	93	5	2	158	A	Mixed	Marine and littoral	Thick	Somewhat poorly drained	5	1	1	1a	67.5416	127.261	195.622	1938.01	264.39	171.944	472.642	2900.84	15.6617	19.7099	138.132	477.177	27.0251	11.172	5.32722	-0.504412	879.658	4813.58	237.162	14.2513	262.206	18.394
7100805601	PSP	45.8999	-77.1327	C	94	5	1	158	A	Mixed	Marine and littoral	Thick	Somewhat poorly drained	5	1	1	1a	67.5416	127.261	195.622	1938.01	264.39	171.944	472.642	2900.84	15.6617	19.7099	138.132	477.177	27.0251	11.172	5.32722	-0.504412	879.658	4813.58	237.162	14.2513	262.206	18.394
7100805602	PSP	45.8962	-77.1331	B	66	26	8	153	A	Deciduous	Marine and littoral	Thick	Somewhat poorly drained	5	1	1	1a	67.5416	127.261	195.622	1938.01	264.39	171.944	472.642	2900.84	15.6617	19.7099	138.132	477.177	27.0251	11.172	5.32722	-0.504412	879.658	4813.58	237.162	14.2513	262.206	18.394
7100805602	PSP	45.8962	-77.1331	C	92	8	0	153	A	Deciduous	Marine and littoral	Thick	Somewhat poorly drained	5	1	1	1a	67.5416	127.261	195.622	1938.01	264.39	171.944	472.642	2900.84	15.6617	19.7099	138.132	477.177	27.0251	11.172	5.32722	-0.504412	879.658	4813.58	237.162	14.2513	262.206	18.394
7100805701	PSP	45.9166	-76.6998	B	62	32	6	178	E	Mixed	Marine and littoral	Thick	Moderately well drained	2	3	3west	3a	62.3511	118.615	191.029	1842.47	260.176	167.317	479.875	2891.88	15.3484	19.3707	142.556	465.071	29.1807	10.6263	4.75483	-1.1252	943.119	4866.55	274.473	13.9145	265.61	18.0141
7100805701	PSP	45.9166	-76.6998	C	37	48	15	178	E	Mixed	Marine and littoral	Thick	Moderately well drained	2	3	3west	3a	62.3511	118.615	191.029	1842.47	260.176	167.317	479.875	2891.88	15.3484	19.3707	142.556	465.071	29.1807	10.6263	4.75483	-1.1252	943.119	4866.55	274.473	13.9145	265.61	18.0141
7100805701	PSP	45.9166	-76.6998	C	48	41	12	178	E	Mixed	Marine and littoral	Thick	Moderately well drained	2	3	3west	3a	62.3511	118.615	191.029	1842.47	260.176	167.317	479.875	2891.88	15.3484	19.3707	142.556	465.071	29.1807	10.6263	4.75483	-1.1252	943.119	4866.55	274.473	13.9145	265.61	18.0141
7100805702	PSP	45.915	-76.7052	B	72	26	2	234	C	Deciduous	Glacial without particular morphology	Medium	Moderately well drained	2	3	3west	3a	56.9725	112.173	184.882	1741.64	257.503	161.199	470.078	2835.96	15.0971	18.7888	146.338	453.001	30.3727	10.2252	4.28383	-1.6752	960.313	4932.76	291.004	13.8137	269.131	17.4781
7100805801	PSP	45.9167	-76.7666	B	50	40	10	317	D	Deciduous	Glacial without particular morphology	Medium	Moderately well drained	2	3	3west	3a	50.0525	104.222	176.924	1618.08	253.939	152.855	457.709	2761.3	14.8039	18.1063	150.719	438.165	31.7309	9.76385	3.69096	-2.35594	985.899	5029.35	311.87	13.6397	275.556	16.8962
7100805802	PSP	45.9152	-76.7613	B	74	19	7	325	E	Deciduous	Glacial without particular morphology	Thin to very thin	Well drained	2	3	3west	3a	50.0525	104.222	176.924	1618.08	253.939	152.855	457.709	2761.3	14.8039	18.1063	150.719	438.165	31.7309	9.76385	3.69096	-2.35594	985.899	5029.35	311.87	13.6397	275.556	16.8962
7100805901	PSP	45.9165	-77.0998	B	42	16	42	114	A	Coniferous	Fluvial	Thin to very thin	Moderately well drained	3	1	1	1a	72.2595	129.62	199.97	2000.07	265.861	177.864	484.987	2950.8	15.7124	20.0623	137.24	484.649	26.3534	11.3057	5.59154	-0.142288	872.061	4753.09	229.113	14.1055	259.048	18.4746
7100805901	PSP	45.9165	-77.0998	B	86	5	9	114	A	Coniferous	Fluvial	Thin to very thin	Moderately well drained	3	1	1	1a	72.2595	129.62	199.97	2000.07	265.861	177.864	484.987	2950.8	15.7124	20.0623	137.24	484.649	26.3534	11.3057	5.59154	-0.142288	872.061	4753.09	229.113	14.1055	259.048	18.4746
7100805901	PSP	45.9165	-77.0998	C	79	14	7	114	A	Coniferous	Fluvial	Thin to very thin	Moderately well drained	3	1	1	1a	72.2595	129.62	199.97	2000.07	265.861	177.864	484.987	2950.8	15.7124	20.0623	137.24	484.649	26.3534	11.3057	5.59154	-0.142288	872.061	4753.09	229.113	14.1055	259.048	18.4746
7100805902	PSP	45.9196	-77.1036	B	78	17	5	119	B	Mixed	Fluvial	Thick	Moderately well drained	2	1	1	1a	70.2541	127.69	198.255	1968.15	264.91	175.487	480.715	2931.05	15.6327	19.8866	138.219	480.944	26.6333	11.222	5.44688	-0.344084	878.005	4777.72	233.645	14.1602	260.119	18.4819
7100805902	PSP	45.9196	-77.1036	C	92	6	2	119	B	Mixed	Fluvial	Thick	Moderately well drained	2	1	1	1a	70.2541	127.69	198.255	1968.15	264.91	175.487	480.715	2931.05	15.6327	19.8866	138.219	480.944	26.6333	11.222	5.44688	-0.344084	878.005	4777.72	233.645	14.1602	260.119	18.4819
7100806001	PSP	45.934	-76.184	B	58	38	4	260	C	Deciduous	Glacial without particular morphology	Medium	Moderately well drained	2	3	3west	3a	48.3185	107.767	185.119	1737.23	256.226	161.363	492.088	2842.54	15.0346	18.7138	149.46	453.328	29.5161	10.4068	4.34209	-1.73269	992.079	4938.8	292.169	13.9245	285.418	17.6832
7100806001	PSP	45.934	-76.184	C	82	16	2	260	C	Deciduous	Glacial without particular morphology	Medium	Moderately well drained	2	3	3west	3a	48.3185	107.767	185.119	1737.23	256.226	161.363	492.088	2842.54	15.0346	18.7138	149.46	453.328	29.5161	10.4068	4.34209	-1.73269	992.079	4938.8	292.169	13.9245	285.418	17.6832
7100806101	PSP	45.9334	-76.7173	B	47	44	9	280	B	Deciduous	Glacial without particular morphology	Medium	Somewhat poorly drained	5	3	3west	3a	53.9403	107.765	181.334	1681.16	255.389	157.501	464.093	2806.37	14.9339	18.4415	148.62	445.77	30.9764	10.0069	4.00486	-1.95845	970.675	4973.55	299.934	13.659	271.463	17.1695
7100806101	PSP	45.9334	-76.7173	C	67	27	6	280	B	Deciduous	Glacial without particular morphology	Medium	Somewhat poorly drained	5	3	3west	3a	53.9403	107.765	181.334	1681.16	255.389	157.501	464.093	2806.37	14.9339	18.4415	148.62	445.77	30.9764	10.0069	4.00486	-1.95845	970.675	4973.55	299.934	13.659	271.463	17.1695
7100806102	PSP	45.9329	-76.7226	B	63	31	6	291	D	Deciduous	Glacial without particular morphology	Thin to very thin	Well drained	0	3	3west	3a	53.9403	107.765	181.334	1681.16	255.389	157.501	464.093	2806.37	14.9339	18.4415	148.62	445.77	30.9764	10.0069	4.00486	-1.95845	970.675	4973.55	299.934	13.659	271.463	17.1695
7100806102	PSP	45.9329	-76.7226	B	63	31	6	291	D	Deciduous	Glacial without particular morphology	Thin to very thin	Well drained	0	3	3west	3a	53.9403	107.765	181.334	1681.16	255.389	157.501	464.093	2806.37	14.9339	18.4415	148.62	445.77	30.9764	10.0069	4.00486	-1.95845	970.675	4973.55	299.934	13.659	271.463	17.1695
7100806201	PSP	45.9502	-77.1817	B	84	11	5	149	E	Coniferous	Glacial without particular morphology	Thin to very thin	Well drained	2	1	1	1a	68.1756	122.686	194.615	1910.79	262.691	171.543	469.726	2898.52	15.5057	19.4978	141.004	474.421	26.5965	11.1093	5.18424	-0.747293	865.978	4817.6	229.749	14.2979	260.176	18.488
7100806201	PSP	45.9502	-77.1817	C	76	20	4	149	E	Coniferous	Glacial without particular morphology	Thin to very thin	Well drained	2	1	1	1a	68.1756	122.686	194.615	1910.79	262.691	171.543	469.726	2898.52	15.5057	19.4978	141.004	474.421	26.5965	11.1093	5.18424	-0.747293	865.978	4817.6	229.749	14.2979	260.176	18.488
7100806301	PSP	45.9503	-77.2666	B	89	8	3	120	A	Coniferous	Fluvial	Thick	Poorly drained	4	1	1	1a	72.3405	121.1	194.891	1910.57	262.295	171.555	460.185	2900.23	15.4834	19.5152	142.196	474.727	26.2843	11.1474	5.17884	-0.786789	844.75	4811.85	221.362	14.3355	254.28	18.5884
7100806301	PSP	45.9503	-77.2666	B	93	5	2	120	A	Coniferous	Fluvial	Thick	Poorly drained	4	1	1	1a	72.3405	121.1	194.891	1910.57	262.295	171.555	460.185	2900.23	15.4834	19.5152	142.196	474.727	26.2843	11.1474	5.17884	-0.786789	844.75	4811.85	221.362	14.3355	254.28	18.5884
7100806301	PSP	45.9503	-77.2666	C	88	10	2	120	A	Coniferous	Fluvial	Thick	Poorly drained	4	1	1	1a	72.3405	121.1	194.891	1910.57	262.295	171.555	460.185	2900.23	15.4834	19.5152	142.196	474.727	26.2843	11.1474	5.17884	-0.786789	844.75	4811.85	221.362	14.3355	254.28	18.5884
7100806302	PSP	45.9541	-77.2666	B	75	17	8	124	A	Mixed	Fluvial	Thick	Moderately well drained	2	1	1	1a	70.4991	119.882	194.398	1907.19	261.813	170.69	463.882	2890.99	15.5008	19.5136	142.924	474.173	26.38	11.1239	5.14722	-0.877118	858	4817.65	225.985	14.3724	257.795	18.6252
7100806302	PSP	45.9541	-77.2666	B	80	16	4	124	A	Mixed	Fluvial	Thick	Moderately well drained	2	1	1	1a	70.4991	119.882	194.398	1907.19	261.813	170.69	463.882	2890.99	15.5008	19.5136	142.924	474.173	26.38	11.1239	5.14722	-0.877118	858	4817.65	225.985	14.3724	257.795	18.6252
7100806302	PSP	45.9541	-77.2666	C	76	18	6	124	A	Mixed	Fluvial	Thick	Moderately well drained	2	1	1	1a	70.4991	119.882	194.398	1907.19	261.813	170.69	463.882	2890.99	15.5008	19.5136	142.924	474.173	26.38	11.1239	5.14722	-0.877118	858	4817.65	225.985	14.3724	257.795	18.6252
7100806302	PSP	45.9541	-77.2666	C	76	18	6	124	A	Mixed	Fluvial	Thick	Moderately well drained	2	1	1	1a	70.4991	119.882	194.398	1907.19	261.813	170.69	463.882	2890.99	15.5008	19.5136	142.924	474.173	26.38	11.1239	5.14722	-0.877118	858	4817.65	225.985	14.3724	257.795	18.6252
7100806302	PSP	45.9541	-77.2666	C	78	20	2	124	A	Mixed	Fluvial	Thick	Moderately well drained	2	1	1	1a	70.4991	119.882	194.398	1907.19	261.813	170.69	463.882	2890.99	15.5008	19.5136	142.924	474.173	26.38	11.1239	5.14722	-0.877118	858	4817.65	225.985	14.3724	257.795	18.6252
7100806401	PSP	45.967	-75.9496	B	60	32	8	214	D	Deciduous	Glacial without particular morphology	Thin	Moderately well drained	2	2	2west	2a	54.4039	123.334	193.126	1848.28	262.718	171.457	511.254	2908.5	15.2155	19.237	140.384	466.387	27.5814	10.6763	4.85547	-0.915461	951.377	4808.75	261.445	13.3709	289.856	17.129
7100806401	PSP	45.967	-75.9496	C	73	21	6	214	D	Deciduous	Glacial without particular morphology	Thin	Moderately well drained	2	2	2west	2a	54.4039	123.334	193.126	1848.28	262.718	171.457	511.254	2908.5	15.2155	19.237	140.384	466.387	27.5814	10.6763	4.85547	-0.915461	951.377	4808.75	261.445	13.3709	289.856	17.129
7100806402	PSP	45.9701	-75.9528	B	56	36	8	174	D	Coniferous	Marine and littoral	Thick	Moderately well drained	2	2	2west	2a	55.1894	123.598	193.591	1852.85	262.926	171.679	508.655	2903.77	15.2268	19.3779	140.331	466.857	27.7529	10.6565	4.86874	-0.925211	949.278	4800.68	262.749	13.3927	287.024	17.1638
7100806402	PSP	45.9701	-75.9528	B	78	15	7	174	D	Coniferous	Marine and littoral	Thick	Moderately well drained	2	2	2west	2a	55.1894	123.598	193.591	1852.85	262.926	171.679	508.655	2903.77	15.2268	19.3779	140.331	466.857	27.7529	10.6565	4.86874	-0.925211	949.278	4800.68	262.749	13.3927	287.024	17.1638
7100806402	PSP	45.9701	-75.9528	B	78	15	7	174	D	Coniferous	Marine and littoral	Thick	Moderately well drained	2	2	2west	2a	55.1894	123.598	193.591	1852.85	262.926	171.679	508.655	2903.77	15.2268	19.3779	140.331	466.857	27.7529	10.6565	4.86874	-0.925211	949.278	4800.68	262.749	13.3927	287.024	17.1638
7100806402	PSP	45.9701	-75.9528	C	66	23	11	174	D	Coniferous	Marine and littoral	Thick	Moderately well drained	2	2	2west	2a	55.1894	123.598	193.591	1852.85	262.926	171.679	508.655	2903.77	15.2268	19.3779	140.331	466.857	27.7529	10.6565	4.86874	-0.925211	949.278	4800.68	262.749	13.3927	287.024	17.1638
7100806402	PSP	45.9701	-75.9528	C	71	20	9	174	D	Coniferous	Marine and littoral	Thick	Moderately well drained	2	2	2west	2a	55.1894	123.598	193.591	1852.85	262.926	171.679	508.655	2903.77	15.2268	19.3779	140.331	466.857	27.7529	10.6565	4.86874	-0.925211	949.278	4800.68	262.749	13.3927	287.024	17.1638
7100806402	PSP	45.9701	-75.9528	C	71	20	9	174	D	Coniferous	Marine and littoral	Thick	Moderately well drained	2	2	2west	2a	55.1894	123.598	193.591	1852.85	262.926	171.679	508.655	2903.77	15.2268	19.3779	140.331	466.857	27.7529	10.6565	4.86874	-0.925211	949.278	4800.68	262.749	13.3927	287.024	17.1638
7100806501	PSP	45.9667	-76.7318	B	76	20	4	272	C	Deciduous	Glacial without particular morphology	Medium	Moderately well drained	2	3	3west	3a	54.9744	112.154	183.808	1708.51	257.602	160.419	470.916	2827.23	14.9525	18.5423	146.456	449.404	30.6306	10.0991	4.15814	-1.83365	967.022	4943.68	295.506	13.6578	270.477	17.1139
7100806501	PSP	45.9667	-76.7318	C	80	16	4	272	C	Deciduous	Glacial without particular morphology	Medium	Moderately well drained	2	3	3west	3a	54.9744	112.154	183.808	1708.51	257.602	160.419	470.916	2827.23	14.9525	18.5423	146.456	449.404	30.6306	10.0991	4.15814	-1.83365	967.022	4943.68	295.506	13.6578	270.477	17.1139
7100806502	PSP	45.9697	-76.7355	B	72	21	7	265	D	Deciduous	Glacial without particular morphology	Medium	Moderately well drained	2	3	3west	3a	56.2308	113.743	183.532	1717.28	258.357	159.749	468.488	2819.77	15.0173	18.6023	145.619	450.377	30.6458	10.1586	4.16457	-1.64195	965.172	4951.07	295.162	13.644	270.273	17.2739
7100806601	PSP	46.0002	-75.8664	B	80	20	0	188	D	Coniferous	Juxtaglacial	Thick	Well drained	1	2	2west	2a	51.5835	124.827	192.834	1818.34	264.012	172.157	517.969	2904.28	15.0403	19.2605	140.191	462.875	28.3985	10.3589	4.65951	-1.01424	970.136	4805.8	274.652	12.9871	289.46	16.6159
7100806601	PSP	46.0002	-75.8664	C	40	56	4	188	D	Coniferous	Juxtaglacial	Thick	Well drained	1	2	2west	2a	51.5835	124.827	192.834	1818.34	264.012	172.157	517.969	2904.28	15.0403	19.2605	140.191	462.875	28.3985	10.3589	4.65951	-1.01424	970.136	4805.8	274.652	12.9871	289.46	16.6159
7100806602	PSP	46.0014	-75.8715	B	57	33	10	306	D	Coniferous	Glacial without particular morphology	Thin	Well drained	0	2	2west	2a	47.1308	119.86	188.292	1730.33	262.344	166.284	509.269	2856.93	14.8286	18.7541	143.481	452.123	29.6523	9.9523	4.27103	-1.39756	990.729	4861.85	292.974	12.8164	294.66	16.3126
7100806701	PSP	46.0002	-76.0001	B	57	33	10	170	D	Mixed	Marine and littoral	Medium	Moderately well drained	2	2	2west	2a	50.5311	117.601	189.574	1779.92	260.057	167.077	502.484	2878.85	15.0395	18.9119	143.449	458.277	28.4158	10.3865	4.53154	-1.35253	962.632	4853.04	272.528	13.4881	291.955	17.1267
7100806701	PSP	46.0002	-76.0001	B	81	14	5	170	D	Mixed	Marine and littoral	Medium	Moderately well drained	2	2	2west	2a	50.5311	117.601	189.574	1779.92	260.057	167.077	502.484	2878.85	15.0395	18.9119	143.449	458.277	28.4158	10.3865	4.53154	-1.35253	962.632	4853.04	272.528	13.4881	291.955	17.1267
7100806701	PSP	46.0002	-76.0001	C	45	31	24	170	D	Mixed	Marine and littoral	Medium	Moderately well drained	2	2	2west	2a	50.5311	117.601	189.574	1779.92	260.057	167.077	502.484	2878.85	15.0395	18.9119	143.449	458.277	28.4158	10.3865	4.53154	-1.35253	962.632	4853.04	272.528	13.4881	291.955	17.1267
7100806702	PSP	46.0034	-75.997	B	19	38	43	160	A	Coniferous	Marine and littoral	Thick	Poorly drained	6	2	2west	2a	52.7454	119.401	191.829	1825.86	260.856	169.481	506.96	2886.49	15.1734	19.1622	142.454	463.642	27.7935	10.584	4.72566	-1.17171	953.595	4816.2	264.04	13.5027	290.354	17.218
7100806702	PSP	46.0034	-75.997	C	17	34	49	160	A	Coniferous	Marine and littoral	Thick	Poorly drained	6	2	2west	2a	52.7454	119.401	191.829	1825.86	260.856	169.481	506.96	2886.49	15.1734	19.1622	142.454	463.642	27.7935	10.584	4.72566	-1.17171	953.595	4816.2	264.04	13.5027	290.354	17.218
7100806702	PSP	46.0034	-75.997	C	18	38	44	160	A	Coniferous	Marine and littoral	Thick	Poorly drained	6	2	2west	2a	52.7454	119.401	191.829	1825.86	260.856	169.481	506.96	2886.49	15.1734	19.1622	142.454	463.642	27.7935	10.584	4.72566	-1.17171	953.595	4816.2	264.04	13.5027	290.354	17.218
7100806702	PSP	46.0034	-75.997	C	18	38	44	160	A	Coniferous	Marine and littoral	Thick	Poorly drained	6	2	2west	2a	52.7454	119.401	191.829	1825.86	260.856	169.481	506.96	2886.49	15.1734	19.1622	142.454	463.642	27.7935	10.584	4.72566	-1.17171	953.595	4816.2	264.04	13.5027	290.354	17.218
7100806802	PSP	46.0133	-75.9835	B	7	50	43	152	B	Mixed	Marine and littoral	Thick	Somewhat poorly drained	6	2	2west	2a	54.038	120.832	192.347	1846.4	261.616	169.901	505.677	2882.8	15.2644	19.2528	141.786	465.889	27.5997	10.6701	4.80908	-1.05909	949.195	4801.15	261.024	13.4745	289.552	17.2094
7100806802	PSP	46.0133	-75.9835	B	7	50	43	152	B	Mixed	Marine and littoral	Thick	Somewhat poorly drained	6	2	2west	2a	54.038	120.832	192.347	1846.4	261.616	169.901	505.677	2882.8	15.2644	19.2528	141.786	465.889	27.5997	10.6701	4.80908	-1.05909	949.195	4801.15	261.024	13.4745	289.552	17.2094
7100806802	PSP	46.0133	-75.9835	C	8	74	19	152	B	Mixed	Marine and littoral	Thick	Somewhat poorly drained	6	2	2west	2a	54.038	120.832	192.347	1846.4	261.616	169.901	505.677	2882.8	15.2644	19.2528	141.786	465.889	27.5997	10.6701	4.80908	-1.05909	949.195	4801.15	261.024	13.4745	289.552	17.2094
7100806802	PSP	46.0133	-75.9835	C	8	73	19	152	B	Mixed	Marine and littoral	Thick	Somewhat poorly drained	6	2	2west	2a	54.038	120.832	192.347	1846.4	261.616	169.901	505.677	2882.8	15.2644	19.2528	141.786	465.889	27.5997	10.6701	4.80908	-1.05909	949.195	4801.15	261.024	13.4745	289.552	17.2094
7100806901	PSP	46.0162	-76.1162	B	68	17	15	170	C	Mixed	Glacial without particular morphology	Thin to very thin	Moderately well drained	2	2	2west	2a	53.7159	118.409	191.081	1823.77	260.756	168.754	501.9	2884.94	15.1877	19.1385	143.348	463.362	27.8677	10.6289	4.71069	-1.2032	951.015	4828.11	264.061	13.6137	287.728	17.3857
7100806901	PSP	46.0162	-76.1162	C	75	14	11	170	C	Mixed	Glacial without particular morphology	Thin to very thin	Moderately well drained	2	2	2west	2a	53.7159	118.409	191.081	1823.77	260.756	168.754	501.9	2884.94	15.1877	19.1385	143.348	463.362	27.8677	10.6289	4.71069	-1.2032	951.015	4828.11	264.061	13.6137	287.728	17.3857
0099100101	PSP	45.3594	-72.8958	B	81	13	6	77	A	Deciduous	Glacial without particular morphology	Medium	Moderately well drained	2	1	1	1a	37.5602	145.817	213.965	2140.05	273.062	190.79	649.364	3080.47	15.7526	20.5129	128.245	503.776	24.9663	11.6628	6.5589	1.43988	1118.48	4671.77	278.36	12.3099	325.383	15.993
0099100101	PSP	45.3594	-72.8958	C	76	17	7	77	A	Deciduous	Glacial without particular morphology	Medium	Moderately well drained	2	1	1	1a	37.5602	145.817	213.965	2140.05	273.062	190.79	649.364	3080.47	15.7526	20.5129	128.245	503.776	24.9663	11.6628	6.5589	1.43988	1118.48	4671.77	278.36	12.3099	325.383	15.993
0099100102	PSP	45.3627	-72.8924	B	61	20	19	80	A	Deciduous	Glacial without particular morphology	Medium	Moderately well drained	2	1	1	1a	37.5602	145.817	213.965	2140.05	273.062	190.79	649.364	3080.47	15.7526	20.5129	128.245	503.776	24.9663	11.6628	6.5589	1.43988	1118.48	4671.77	278.36	12.3099	325.383	15.993
0099100102	PSP	45.3627	-72.8924	B	83	11	6	80	A	Deciduous	Glacial without particular morphology	Medium	Moderately well drained	2	1	1	1a	37.5602	145.817	213.965	2140.05	273.062	190.79	649.364	3080.47	15.7526	20.5129	128.245	503.776	24.9663	11.6628	6.5589	1.43988	1118.48	4671.77	278.36	12.3099	325.383	15.993
0099100102	PSP	45.3627	-72.8924	C	89	9	2	80	A	Deciduous	Glacial without particular morphology	Medium	Moderately well drained	2	1	1	1a	37.5602	145.817	213.965	2140.05	273.062	190.79	649.364	3080.47	15.7526	20.5129	128.245	503.776	24.9663	11.6628	6.5589	1.43988	1118.48	4671.77	278.36	12.3099	325.383	15.993
0099100201	PSP	45.492	-71.1673	B	56	30	14	589	D	Deciduous	Glacial without particular morphology	Thick	Moderately well drained	5	3	3east	3d	10.796	110.831	184.115	1341.52	257.987	163.58	716.64	2771.64	12.6718	16.18	148.144	408.497	36.995	7.06407	2.8322	-1.24599	1493.28	4882.48	549.198	7.78428	426.431	9.58496
0099100201	PSP	45.492	-71.1673	C	57	28	15	589	D	Deciduous	Glacial without particular morphology	Thick	Moderately well drained	5	3	3east	3d	10.796	110.831	184.115	1341.52	257.987	163.58	716.64	2771.64	12.6718	16.18	148.144	408.497	36.995	7.06407	2.8322	-1.24599	1493.28	4882.48	549.198	7.78428	426.431	9.58496
0099100202	PSP	45.4907	-71.1618	B	55	31	14	631	D	Deciduous	Glacial without particular morphology	Thick	Moderately well drained	2	3	3east	3d	10.9348	109.625	184.35	1346.75	257.395	165.033	719.791	2805.97	12.6555	16.2522	148.76	409.117	37.0755	7.09386	2.85648	-1.26601	1490.5	4891.43	550.731	7.9527	428.374	9.77146
0099100202	PSP	45.4907	-71.1618	C	42	37	21	631	D	Deciduous	Glacial without particular morphology	Thick	Moderately well drained	2	3	3east	3d	10.9348	109.625	184.35	1346.75	257.395	165.033	719.791	2805.97	12.6555	16.2522	148.76	409.117	37.0755	7.09386	2.85648	-1.26601	1490.5	4891.43	550.731	7.9527	428.374	9.77146
0099100301	PSP	45.4771	-72.5879	B	57	27	16	177	B	Deciduous	Glacial without particular morphology	Medium	Moderately well drained	2	2	2east	2c	28.9497	127.27	201.504	1912.3	264.975	178.168	624.395	2978.19	15.1516	19.4513	138.704	475.703	27.6168	10.9209	5.48679	0.0418458	1159.81	4794.43	321.159	12.4307	350.973	15.7742
0099100301	PSP	45.4771	-72.5879	C	54	30	16	177	B	Deciduous	Glacial without particular morphology	Medium	Moderately well drained	2	2	2east	2c	28.9497	127.27	201.504	1912.3	264.975	178.168	624.395	2978.19	15.1516	19.4513	138.704	475.703	27.6168	10.9209	5.48679	0.0418458	1159.81	4794.43	321.159	12.4307	350.973	15.7742
0099100302	PSP	45.4797	-72.5845	B	70	19	11	169	A	Deciduous	Glacial without particular morphology	Medium	Moderately well drained	2	2	2east	2c	28.9497	127.27	201.504	1912.3	264.975	178.168	624.395	2978.19	15.1516	19.4513	138.704	475.703	27.6168	10.9209	5.48679	0.0418458	1159.81	4794.43	321.159	12.4307	350.973	15.7742
0099100302	PSP	45.4797	-72.5845	C	76	13	11	169	A	Deciduous	Glacial without particular morphology	Medium	Moderately well drained	2	2	2east	2c	28.9497	127.27	201.504	1912.3	264.975	178.168	624.395	2978.19	15.1516	19.4513	138.704	475.703	27.6168	10.9209	5.48679	0.0418458	1159.81	4794.43	321.159	12.4307	350.973	15.7742
0099100401	PSP	45.5056	-73.0465	B	85	10	5	42	A	Deciduous	Glacial without particular morphology	Thick	Moderately well drained	1	1	1	1a	54.8334	147.137	212.896	2149.79	273.069	190.551	609.463	3094.27	15.8521	20.59	126.932	504.945	25.1482	11.6647	6.56666	1.50422	1054.22	4687.58	265.041	12.4323	305.621	16.247
0099100401	PSP	45.5056	-73.0465	C	88	8	4	42	A	Deciduous	Glacial without particular morphology	Thick	Moderately well drained	1	1	1	1a	54.8334	147.137	212.896	2149.79	273.069	190.551	609.463	3094.27	15.8521	20.59	126.932	504.945	25.1482	11.6647	6.56666	1.50422	1054.22	4687.58	265.041	12.4323	305.621	16.247
0099100402	PSP	45.5025	-73.0498	B	77	15	8	49	A	Deciduous	Glacial without particular morphology	Thick	Somewhat poorly drained	4	1	1	1a	54.8334	147.137	212.896	2149.79	273.069	190.551	609.463	3094.27	15.8521	20.59	126.932	504.945	25.1482	11.6647	6.56666	1.50422	1054.22	4687.58	265.041	12.4323	305.621	16.247
0099100402	PSP	45.5025	-73.0498	C	27	35	38	49	A	Deciduous	Glacial without particular morphology	Thick	Somewhat poorly drained	4	1	1	1a	54.8334	147.137	212.896	2149.79	273.069	190.551	609.463	3094.27	15.8521	20.59	126.932	504.945	25.1482	11.6647	6.56666	1.50422	1054.22	4687.58	265.041	12.4323	305.621	16.247
0099100501	PSP	45.5006	-73.0591	B	85	7	8	56	C	Deciduous	Glacial without particular morphology	Thick	Moderately well drained	2	1	1	1a	55.8691	147.27	212.721	2152.68	273.151	190.525	599.057	3097.48	15.8735	20.6266	126.879	505.343	25.0883	11.6948	6.58011	1.51861	1033.39	4694.1	259.062	12.5062	300.971	16.329
0099100501	PSP	45.5006	-73.0591	B	96	2	2	56	C	Deciduous	Glacial without particular morphology	Thick	Moderately well drained	2	1	1	1a	55.8691	147.27	212.721	2152.68	273.151	190.525	599.057	3097.48	15.8735	20.6266	126.879	505.343	25.0883	11.6948	6.58011	1.51861	1033.39	4694.1	259.062	12.5062	300.971	16.329
0099100501	PSP	45.5006	-73.0591	C	97	1	2	56	C	Deciduous	Glacial without particular morphology	Thick	Moderately well drained	2	1	1	1a	55.8691	147.27	212.721	2152.68	273.151	190.525	599.057	3097.48	15.8735	20.6266	126.879	505.343	25.0883	11.6948	6.58011	1.51861	1033.39	4694.1	259.062	12.5062	300.971	16.329
0099100502	PSP	45.4968	-73.0592	B	61	27	12	85	C	Deciduous	Glacial without particular morphology	Medium	Moderately well drained	2	1	1	1a	48.2815	146.802	211.988	2123.45	273.271	189.797	627.62	3081.95	15.7583	20.4695	127.468	501.543	25.6659	11.53	6.47324	1.42518	1095.91	4698.49	281.257	12.2465	315.442	15.8727
0099100601	PSP	45.7328	-72.2765	B	41	43	16	191	A	Deciduous	Glacial without particular morphology	Thick	Moderately well drained	2	2	2east	2c	35.4245	133.504	201.43	1862.03	267.526	179.008	623.633	2962.84	14.9014	19.229	135.024	469.574	28.6547	10.2872	5.2594	0.245986	1151.5	4745.57	329.735	11.3286	342.27	14.3713
0099100601	PSP	45.7328	-72.2765	C	62	24	14	191	A	Deciduous	Glacial without particular morphology	Thick	Moderately well drained	2	2	2east	2c	35.4245	133.504	201.43	1862.03	267.526	179.008	623.633	2962.84	14.9014	19.229	135.024	469.574	28.6547	10.2872	5.2594	0.245986	1151.5	4745.57	329.735	11.3286	342.27	14.3713
0099100602	PSP	45.7367	-72.2761	B	60	33	7	188	B	Deciduous	Glacial without particular morphology	Medium	Somewhat poorly drained	5	2	2east	2c	35.5491	133.677	201.481	1872.34	267.461	178.622	624.819	2953.35	14.9751	19.3327	134.785	470.498	28.5408	10.3131	5.28989	0.26575	1153.66	4740.08	329.203	11.3264	344.81	14.3838
0099100602	PSP	45.7367	-72.2761	C	59	27	14	188	B	Deciduous	Glacial without particular morphology	Medium	Somewhat poorly drained	5	2	2east	2c	35.5491	133.677	201.481	1872.34	267.461	178.622	624.819	2953.35	14.9751	19.3327	134.785	470.498	28.5408	10.3131	5.28989	0.26575	1153.66	4740.08	329.203	11.3264	344.81	14.3838
0099100701	PSP	45.862	-71.1847	B	60	30	10	350	C	Deciduous	Glacial without particular morphology	Medium	Moderately well drained	2	3	3east	3d	30.0694	124.733	191.775	1682.58	263.982	169.201	610.519	2880.94	14.4027	18.3722	140.249	447.954	29.2857	9.5066	4.35085	-0.813104	1129.49	4843.94	330.536	11.2731	363.018	14.0615
0099100701	PSP	45.862	-71.1847	B	78	8	14	350	C	Deciduous	Glacial without particular morphology	Medium	Moderately well drained	2	3	3east	3d	30.0694	124.733	191.775	1682.58	263.982	169.201	610.519	2880.94	14.4027	18.3722	140.249	447.954	29.2857	9.5066	4.35085	-0.813104	1129.49	4843.94	330.536	11.2731	363.018	14.0615
0099100701	PSP	45.862	-71.1847	C	51	37	12	350	C	Deciduous	Glacial without particular morphology	Medium	Moderately well drained	2	3	3east	3d	30.0694	124.733	191.775	1682.58	263.982	169.201	610.519	2880.94	14.4027	18.3722	140.249	447.954	29.2857	9.5066	4.35085	-0.813104	1129.49	4843.94	330.536	11.2731	363.018	14.0615
0099100702	PSP	45.8589	-71.188	B	44	39	17	360	B	Mixed	Glacial without particular morphology	Thick	Somewhat poorly drained	5	3	3east	3d	30.0694	124.733	191.775	1682.58	263.982	169.201	610.519	2880.94	14.4027	18.3722	140.249	447.954	29.2857	9.5066	4.35085	-0.813104	1129.49	4843.94	330.536	11.2731	363.018	14.0615
0099100702	PSP	45.8589	-71.188	C	40	34	26	360	B	Mixed	Glacial without particular morphology	Thick	Somewhat poorly drained	5	3	3east	3d	30.0694	124.733	191.775	1682.58	263.982	169.201	610.519	2880.94	14.4027	18.3722	140.249	447.954	29.2857	9.5066	4.35085	-0.813104	1129.49	4843.94	330.536	11.2731	363.018	14.0615
0099100801	PSP	46.0564	-71.8831	B	65	20	15	266	D	Deciduous	Glacial without particular morphology	Thick	Moderately well drained	2	3	3east	3d	29.0805	124.512	196.7	1802.34	261.983	171.889	616.714	2875.27	14.9148	18.8439	138.472	461.574	29.2487	9.92884	4.81046	-0.238004	1175.68	4748.08	343.552	11.4807	349.098	14.4796
0099100801	PSP	46.0564	-71.8831	C	67	19	14	266	D	Deciduous	Glacial without particular morphology	Thick	Moderately well drained	2	3	3east	3d	29.0805	124.512	196.7	1802.34	261.983	171.889	616.714	2875.27	14.9148	18.8439	138.472	461.574	29.2487	9.92884	4.81046	-0.238004	1175.68	4748.08	343.552	11.4807	349.098	14.4796
0099100802	PSP	46.0587	-71.886	B	72	18	10	279	B	Deciduous	Glacial without particular morphology	Thick	Moderately well drained	2	3	3east	3d	20.4288	129.125	196.603	1723.92	264.368	173.312	674.849	2895.63	14.4571	18.447	136.241	451.498	31.5862	9.13259	4.46894	-0.129979	1306.45	4768.99	411.433	10.147	381.223	12.8061
0099100802	PSP	46.0587	-71.886	C	71	16	13	279	B	Deciduous	Glacial without particular morphology	Thick	Moderately well drained	2	3	3east	3d	20.4288	129.125	196.603	1723.92	264.368	173.312	674.849	2895.63	14.4571	18.447	136.241	451.498	31.5862	9.13259	4.46894	-0.129979	1306.45	4768.99	411.433	10.147	381.223	12.8061
0119600401	PSP	48.5677	-64.8174	B	74	24	2	430	A	Coniferous	Slope and in situ weathered	Thick	Moderately well drained	3	5	5east	5h	27.7428	78.2231	152.053	1141.26	245.616	136.794	464.992	2558.52	12.8053	15.6129	168.399	382.828	39.8832	7.51975	1.62055	-4.5062	1194.56	5105.93	476.29	12.552	330.353	15.0327
0119600401	PSP	48.5677	-64.8174	C	38	36	26	430	A	Coniferous	Slope and in situ weathered	Thick	Moderately well drained	3	5	5east	5h	27.7428	78.2231	152.053	1141.26	245.616	136.794	464.992	2558.52	12.8053	15.6129	168.399	382.828	39.8832	7.51975	1.62055	-4.5062	1194.56	5105.93	476.29	12.552	330.353	15.0327
0119600402	PSP	48.5648	-64.8208	B	45	39	16	415	C	Coniferous	Slope and in situ weathered	Thick	Moderately well drained	2	5	5east	5h	26.743	82.7159	153.195	1148.5	248.119	136.61	474.271	2556.98	12.8471	15.6639	166.404	383.609	39.3604	7.49219	1.6331	-4.24951	1197.91	5085.83	471.167	11.6877	337.095	14.2021
0119600402	PSP	48.5648	-64.8208	C	38	38	24	415	C	Coniferous	Slope and in situ weathered	Thick	Moderately well drained	2	5	5east	5h	26.743	82.7159	153.195	1148.5	248.119	136.61	474.271	2556.98	12.8471	15.6639	166.404	383.609	39.3604	7.49219	1.6331	-4.24951	1197.91	5085.83	471.167	11.6877	337.095	14.2021
0119600501	PSP	48.6991	-66.8684	B	39	37	24	440	A	Coniferous	Slope and in situ weathered	Medium	Moderately well drained	5	5	5east	5h	24.1995	97.4713	161.703	1236.29	252.209	144.077	491.744	2594.34	13.0806	16.278	155.738	389.42	40.9918	6.56726	1.52709	-3.47875	1148.49	4928.18	469.628	10.763	323.754	13.0091
0119600502	PSP	48.7001	-66.8629	B	54	28	18	439	B	Coniferous	Slope and in situ weathered	Thick	Moderately well drained	5	5	5east	5h	23.4857	97.551	161.918	1238.59	252.292	144.479	496.104	2599.7	13.0831	16.2911	155.743	389.553	40.9233	6.55843	1.53305	-3.51167	1153.95	4924.93	471.956	10.7943	327.559	13.0324
0119600502	PSP	48.7001	-66.8629	C	29	51	20	439	B	Coniferous	Slope and in situ weathered	Thick	Moderately well drained	5	5	5east	5h	23.4857	97.551	161.918	1238.59	252.292	144.479	496.104	2599.7	13.0831	16.2911	155.743	389.553	40.9233	6.55843	1.53305	-3.51167	1153.95	4924.93	471.956	10.7943	327.559	13.0324
0119600701	PSP	48.7658	-64.6623	B	54	24	22	280	B	Coniferous	Slope and in situ weathered	Medium	Moderately well drained	2	5	5east	5h	35.0618	113.413	178.296	1208.16	262.876	159.515	522.835	2534.61	12.2526	15.9361	150.467	392.801	37.4399	6.92802	2.6822	-1.67346	1167.64	4519.93	436.599	8.24804	318.478	10.3479
0119600701	PSP	48.7658	-64.6623	C	68	24	8	280	B	Coniferous	Slope and in situ weathered	Medium	Moderately well drained	2	5	5east	5h	35.0618	113.413	178.296	1208.16	262.876	159.515	522.835	2534.61	12.2526	15.9361	150.467	392.801	37.4399	6.92802	2.6822	-1.67346	1167.64	4519.93	436.599	8.24804	318.478	10.3479
0119600702	PSP	48.7671	-64.6675	B	42	32	26	309	D	Coniferous	Slope and in situ weathered	Medium	Moderately well drained	2	5	5east	5h	34.0932	113.41	177.232	1188.46	262.85	159.326	527.627	2527.59	12.136	15.8236	150.449	389.976	37.8712	6.73571	2.55616	-1.59817	1171.07	4511	443.073	7.81297	319.941	10.0085
0119600702	PSP	48.7671	-64.6675	C	42	34	24	309	D	Coniferous	Slope and in situ weathered	Medium	Moderately well drained	2	5	5east	5h	34.0932	113.41	177.232	1188.46	262.85	159.326	527.627	2527.59	12.136	15.8236	150.449	389.976	37.8712	6.73571	2.55616	-1.59817	1171.07	4511	443.073	7.81297	319.941	10.0085
0119900101	PSP	47.2624	-71.1492	C	80	13	7	723	C	Coniferous	Glacial without particular morphology	Medium	Somewhat poorly drained	6	5	5east	5e	9.06898	48.0085	142.136	997.029	225.816	116.965	503.173	2384.15	12.3774	14.1693	178.806	364.14	43.7375	6.31319	0.365037	-5.59098	1507.82	5425.88	659.465	10.8677	397.272	12.9189
0119900102	PSP	47.2627	-71.1471	B	70	17	13	717	D	Mixed	Glacial without particular morphology	Medium	Well drained	3	5	5east	5e	9.06898	48.0085	142.136	997.029	225.816	116.965	503.173	2384.15	12.3774	14.1693	178.806	364.14	43.7375	6.31319	0.365037	-5.59098	1507.82	5425.88	659.465	10.8677	397.272	12.9189
0119900102	PSP	47.2627	-71.1471	C	75	16	9	717	D	Mixed	Glacial without particular morphology	Medium	Well drained	3	5	5east	5e	9.06898	48.0085	142.136	997.029	225.816	116.965	503.173	2384.15	12.3774	14.1693	178.806	364.14	43.7375	6.31319	0.365037	-5.59098	1507.82	5425.88	659.465	10.8677	397.272	12.9189
0219600202	PSP	46.7717	-73.4089	B	88	6	6	376	A	Coniferous	Lacustrine	Thick	Moderately well drained	2	3	3east	3c	34.0281	81.0728	163.087	1395.63	242.861	139.251	478.906	2586.41	14.1004	16.949	162.788	413.992	31.7985	8.77621	2.3337	-4.08658	1054.76	5082.12	334.183	13.3025	318.995	16.258
0219600202	PSP	46.7717	-73.4089	C	89	1	10	376	A	Coniferous	Lacustrine	Thick	Moderately well drained	2	3	3east	3c	34.0281	81.0728	163.087	1395.63	242.861	139.251	478.906	2586.41	14.1004	16.949	162.788	413.992	31.7985	8.77621	2.3337	-4.08658	1054.76	5082.12	334.183	13.3025	318.995	16.258
0219600401	PSP	48.087	-72.4245	B	70	24	6	424	D	Coniferous	Glacial without particular morphology	Medium	Moderately well drained	2	5	5west	5c	39.7847	100.305	169.485	1390.52	255.086	150.126	478.922	2601.37	13.6742	17.0994	155.781	406.921	33.8207	7.21705	1.81329	-3.5879	969.398	4826.35	326.476	11.0342	306.366	13.4733
0219600401	PSP	48.087	-72.4245	C	67	27	6	424	D	Coniferous	Glacial without particular morphology	Medium	Moderately well drained	2	5	5west	5c	39.7847	100.305	169.485	1390.52	255.086	150.126	478.922	2601.37	13.6742	17.0994	155.781	406.921	33.8207	7.21705	1.81329	-3.5879	969.398	4826.35	326.476	11.0342	306.366	13.4733
0219900101	PSP	47.3167	-71.0962	B	71	21	8	853	E	Coniferous	Glacial without particular morphology	Thick	Moderately well drained	2	5	5east	5e	9.12961	45.0141	134.103	910.197	224.629	110.682	468.538	2312.23	12.0297	13.5789	180.615	352.333	44.9162	5.69215	-0.320237	-6.32273	1449.58	5522.8	652.198	10.7452	389.526	12.4664
0219900101	PSP	47.3167	-71.0962	C	78	14	8	853	E	Coniferous	Glacial without particular morphology	Thick	Moderately well drained	2	5	5east	5e	9.12961	45.0141	134.103	910.197	224.629	110.682	468.538	2312.23	12.0297	13.5789	180.615	352.333	44.9162	5.69215	-0.320237	-6.32273	1449.58	5522.8	652.198	10.7452	389.526	12.4664
0300400102	PSP	48.0681	-70.7887	B	65	33	2	440	D	Mixed	Juxtaglacial	Thick	Moderately well drained	2	5	5east	5e	20.1017	78.9089	155.101	1235.41	241.109	138.189	464.717	2501	13.233	16.099	163.194	389.616	34.6313	7.13903	1.05883	-5.12115	998.57	4987.66	346.824	12.8111	318.326	15.418
0300400102	PSP	48.0681	-70.7887	C	28	59	13	440	D	Mixed	Juxtaglacial	Thick	Moderately well drained	2	5	5east	5e	20.1017	78.9089	155.101	1235.41	241.109	138.189	464.717	2501	13.233	16.099	163.194	389.616	34.6313	7.13903	1.05883	-5.12115	998.57	4987.66	346.824	12.8111	318.326	15.418
0300600202	PSP	47.0292	-72.1348	B	58	35	7	289	B	Deciduous	Glacial without particular morphology	Medium	Moderately well drained	2	3	3east	3c	17.2716	97.7102	172.264	1468.4	253.585	149.568	575.315	2593.38	14.1074	17.6073	156.877	422.69	29.2731	8.68859	2.60987	-3.49702	1160.18	4883.33	338.326	12.0209	354.119	15.1701
0300600202	PSP	47.0292	-72.1348	C	51	42	7	289	B	Deciduous	Glacial without particular morphology	Medium	Moderately well drained	2	3	3east	3c	17.2716	97.7102	172.264	1468.4	253.585	149.568	575.315	2593.38	14.1074	17.6073	156.877	422.69	29.2731	8.68859	2.60987	-3.49702	1160.18	4883.33	338.326	12.0209	354.119	15.1701
0300600301	PSP	47.0833	-72.1826	B	78	16	6	452	F	Mixed	Glacial characterized by its morphology	Thick	Well drained	2	4	4west	4c	13.516	78.9082	153.79	1234.22	241.801	130.128	529.625	2419.66	13.5038	16.2447	163.893	396.932	33.2673	7.95282	1.41197	-5.11307	1244.09	5184.73	413.284	12.2883	370.337	14.7528
0300600302	PSP	47.0853	-72.1873	B	57	35	8	461	D	Mixed	Glacial without particular morphology	Medium	Moderately well drained	2	4	4west	4c	13.9057	80.8311	155.591	1256.92	242.878	132.175	536.825	2446.89	13.5616	16.3847	163.048	398.737	33.1054	7.99798	1.52658	-4.91218	1242.93	5158.21	411.377	12.2797	370.187	14.8291
0301000101	PSP	47.274	-69.8792	B	53	22	25	228	C	Deciduous	Glacial without particular morphology	Thick	Well drained	3	4	4east	4f	41.7498	103.61	178.504	1495	254.587	163.292	514.008	2827.19	13.7062	17.6193	151.977	424.606	33.2963	8.53977	3.28	-1.96586	1013.83	4825.55	336.646	11.5551	297.348	14.5838
0301100101	PSP	45.4829	-75.9191	B	65	24	11	92	A	Deciduous	Marine and littoral	Thick	Moderately well drained	3	1	1	1a	77.2249	140.62	207.247	2086.04	269.816	185.68	527.826	3082.51	15.7817	20.5308	130.196	496.394	26.6101	11.6023	6.15357	0.666931	938.364	4768.49	248.337	13.3957	264.161	17.6109
0301100101	PSP	45.4829	-75.9191	C	33	23	45	92	A	Deciduous	Marine and littoral	Thick	Moderately well drained	3	1	1	1a	77.2249	140.62	207.247	2086.04	269.816	185.68	527.826	3082.51	15.7817	20.5308	130.196	496.394	26.6101	11.6023	6.15357	0.666931	938.364	4768.49	248.337	13.3957	264.161	17.6109
0301100102	PSP	45.4808	-75.9238	B	54	30	16	91	C	Mixed	Lacustrine	Thick	Moderately well drained	3	1	1	1a	77.2249	140.62	207.247	2086.04	269.816	185.68	527.826	3082.51	15.7817	20.5308	130.196	496.394	26.6101	11.6023	6.15357	0.666931	938.364	4768.49	248.337	13.3957	264.161	17.6109
0301100102	PSP	45.4808	-75.9238	C	20	24	56	91	C	Mixed	Lacustrine	Thick	Moderately well drained	3	1	1	1a	77.2249	140.62	207.247	2086.04	269.816	185.68	527.826	3082.51	15.7817	20.5308	130.196	496.394	26.6101	11.6023	6.15357	0.666931	938.364	4768.49	248.337	13.3957	264.161	17.6109
0301200102	PSP	45.7807	-76.4627	B	54	36	10	230	B	Mixed	Fluvial	Thick	Moderately well drained	2	2	2west	2a	58.5899	119.612	191.919	1836.01	260.337	168.163	493.163	2897.72	15.2699	19.2058	141.727	464.513	29.0063	10.5714	4.81602	-0.959911	971.544	4877.46	281.241	13.6167	272.052	17.5102
0301200102	PSP	45.7807	-76.4627	B	78	17	5	230	B	Mixed	Fluvial	Thick	Moderately well drained	2	2	2west	2a	58.5899	119.612	191.919	1836.01	260.337	168.163	493.163	2897.72	15.2699	19.2058	141.727	464.513	29.0063	10.5714	4.81602	-0.959911	971.544	4877.46	281.241	13.6167	272.052	17.5102
0301200102	PSP	45.7807	-76.4627	C	68	27	5	230	B	Mixed	Fluvial	Thick	Moderately well drained	2	2	2west	2a	58.5899	119.612	191.919	1836.01	260.337	168.163	493.163	2897.72	15.2699	19.2058	141.727	464.513	29.0063	10.5714	4.81602	-0.959911	971.544	4877.46	281.241	13.6167	272.052	17.5102
0301200102	PSP	45.7807	-76.4627	C	89	9	2	230	B	Mixed	Fluvial	Thick	Moderately well drained	2	2	2west	2a	58.5899	119.612	191.919	1836.01	260.337	168.163	493.163	2897.72	15.2699	19.2058	141.727	464.513	29.0063	10.5714	4.81602	-0.959911	971.544	4877.46	281.241	13.6167	272.052	17.5102
0301200201	PSP	45.833	-76.721	B	95	2	3	110	A	Deciduous	Fluvial	Thick	Well drained	1	1	1	1a	68.6894	124.803	196.894	1933.7	263.111	173.291	484.73	2947.63	15.5593	19.925	139.309	476.191	27.9692	10.9602	5.19801	-0.552546	914.629	4802.74	255.229	13.94	257.634	18.354
0301200201	PSP	45.833	-76.721	C	99	0	1	110	A	Deciduous	Fluvial	Thick	Well drained	1	1	1	1a	68.6894	124.803	196.894	1933.7	263.111	173.291	484.73	2947.63	15.5593	19.925	139.309	476.191	27.9692	10.9602	5.19801	-0.552546	914.629	4802.74	255.229	13.94	257.634	18.354
0301200302	PSP	45.8822	-76.4334	B	53	44	3	207	D	Mixed	Glacial without particular morphology	Thick	Moderately well drained	2	3	3west	3a	59.8592	120.047	191.62	1822.45	260.514	168.603	495.249	2924.57	15.185	19.2986	141.472	463.273	31.4174	10.4845	4.71121	-1.0874	1018.22	4915.67	319.221	13.5741	269.526	17.4484
0301200302	PSP	45.8822	-76.4334	C	83	14	3	207	D	Mixed	Glacial without particular morphology	Thick	Moderately well drained	2	3	3west	3a	59.8592	120.047	191.62	1822.45	260.514	168.603	495.249	2924.57	15.185	19.2986	141.472	463.273	31.4174	10.4845	4.71121	-1.0874	1018.22	4915.67	319.221	13.5741	269.526	17.4484
0301200401	PSP	45.8841	-76.6843	B	76	19	5	162	A	Coniferous	Marine and littoral	Thick	Well drained	2	1	1	1a	63.4576	120.322	192.259	1860.42	260.883	168.751	482.368	2903.9	15.3748	19.4703	141.561	467.338	28.9247	10.682	4.84959	-1.00552	938.749	4852.42	270.606	13.8961	264.159	18.0082
0301200401	PSP	45.8841	-76.6843	C	81	14	5	162	A	Coniferous	Marine and littoral	Thick	Well drained	2	1	1	1a	63.4576	120.322	192.259	1860.42	260.883	168.751	482.368	2903.9	15.3748	19.4703	141.561	467.338	28.9247	10.682	4.84959	-1.00552	938.749	4852.42	270.606	13.8961	264.159	18.0082
0301300102	PSP	46.5713	-75.7571	B	58	37	5	270	B	Deciduous	Glacial without particular morphology	Thick	Moderately well drained	2	3	3west	3b	38.8168	99.1594	181.342	1633.7	252.889	154.639	481.142	2689.56	14.7213	18.2453	154.732	441.564	29.5619	9.6059	3.63737	-2.29715	985.232	4843.28	290.826	13.0706	293.222	16.5446
0301300102	PSP	46.5713	-75.7571	C	64	30	6	270	B	Deciduous	Glacial without particular morphology	Thick	Moderately well drained	2	3	3west	3b	38.8168	99.1594	181.342	1633.7	252.889	154.639	481.142	2689.56	14.7213	18.2453	154.732	441.564	29.5619	9.6059	3.63737	-2.29715	985.232	4843.28	290.826	13.0706	293.222	16.5446
0301400101	PSP	46.1652	-76.1112	B	70	23	7	260	D	Deciduous	Glacial without particular morphology	Thick	Moderately well drained	2	3	3west	3a	55.7807	115.602	187.516	1759.86	259.46	164.689	482.631	2857.44	15.0265	18.8105	144.85	455.819	28.9116	10.3345	4.37992	-1.53279	942.779	4874.89	271.596	13.6753	282.342	17.2685
0301400101	PSP	46.1652	-76.1112	C	76	18	6	260	D	Deciduous	Glacial without particular morphology	Thick	Moderately well drained	2	3	3west	3a	55.7807	115.602	187.516	1759.86	259.46	164.689	482.631	2857.44	15.0265	18.8105	144.85	455.819	28.9116	10.3345	4.37992	-1.53279	942.779	4874.89	271.596	13.6753	282.342	17.2685
0301400202	PSP	46.4515	-76.9441	B	72	23	5	281	B	Mixed	Glacial without particular morphology	Thin to very thin	Moderately well drained	2	3	3west	3a	53.826	97.9835	171.417	1553.18	252.223	148.399	417.46	2676.71	14.5795	17.7054	155.237	432.329	31.205	9.62424	3.29249	-3.01306	893.714	5017.61	279.305	14.0913	260.988	17.2506
0301400202	PSP	46.4515	-76.9441	C	58	37	5	281	B	Mixed	Glacial without particular morphology	Thin to very thin	Moderately well drained	2	3	3west	3a	53.826	97.9835	171.417	1553.18	252.223	148.399	417.46	2676.71	14.5795	17.7054	155.237	432.329	31.205	9.62424	3.29249	-3.01306	893.714	5017.61	279.305	14.0913	260.988	17.2506
0301500102	PSP	46.7211	-77.8825	B	85	10	5	406	C	Deciduous	Glacial without particular morphology	Thin	Well drained	2	3	3west	3a	52.9168	103.757	168.28	1459.5	255.576	146.995	418.954	2647.15	14.1514	17.1574	152.82	420.61	32.4833	8.92743	2.78	-3.38457	899.535	5035.77	291.472	13.2824	258.308	15.8642
0301700201	PSP	46.5384	-78.2761	B	56	32	12	384	B	Deciduous	Glacial without particular morphology	Thick	Moderately well drained	2	3	3west	3a	54.1916	121.79	182.108	1618.26	263.756	160.844	472.833	2790.15	14.4685	17.9633	142.964	438.287	30.9074	9.30408	3.66125	-1.91115	938.363	4922.8	288.85	12.5625	265.775	15.3304
0301700201	PSP	46.5384	-78.2761	C	75	20	5	384	B	Deciduous	Glacial without particular morphology	Thick	Moderately well drained	2	3	3west	3a	54.1916	121.79	182.108	1618.26	263.756	160.844	472.833	2790.15	14.4685	17.9633	142.964	438.287	30.9074	9.30408	3.66125	-1.91115	938.363	4922.8	288.85	12.5625	265.775	15.3304
0301700302	PSP	46.7041	-78.7989	B	72	22	6	348	B	Deciduous	Glacial without particular morphology	Medium	Moderately well drained	2	3	3west	3a	58.8438	128.788	186.226	1627.48	268.724	166.31	484.41	2813.56	14.2916	18.2562	140.935	439.149	31.3317	9.09633	3.79197	-1.45182	942.057	4833.77	293.981	11.6673	264.414	14.5321
0301700302	PSP	46.7041	-78.7989	C	73	23	4	348	B	Deciduous	Glacial without particular morphology	Medium	Moderately well drained	2	3	3west	3a	58.8438	128.788	186.226	1627.48	268.724	166.31	484.41	2813.56	14.2916	18.2562	140.935	439.149	31.3317	9.09633	3.79197	-1.45182	942.057	4833.77	293.981	11.6673	264.414	14.5321
0301700402	PSP	46.7317	-78.5943	B	64	30	6	368	B	Mixed	Glacial without particular morphology	Medium	Moderately well drained	2	3	3west	3a	55.251	119.09	180.983	1583.62	263.25	159.32	465.374	2760.63	14.3258	17.934	145.158	433.797	31.7465	9.10471	3.44734	-2.21768	944.014	4921.04	298.536	12.4942	265.93	15.2222
0301700402	PSP	46.7317	-78.5943	C	75	21	4	368	B	Mixed	Glacial without particular morphology	Medium	Moderately well drained	2	3	3west	3a	55.251	119.09	180.983	1583.62	263.25	159.32	465.374	2760.63	14.3258	17.934	145.158	433.797	31.7465	9.10471	3.44734	-2.21768	944.014	4921.04	298.536	12.4942	265.93	15.2222
0301800101	PSP	46.9344	-78.5915	B	94	3	3	306	C	Coniferous	Glacial without particular morphology	Medium	Moderately well drained	1	3	3west	3a	51.9268	109.466	180.287	1586.07	260.449	155.966	459.279	2668.2	14.4536	18.0874	151.979	432.778	31.7528	8.89493	3.20211	-2.52322	944.438	4833.32	298.779	12.2808	269.03	15.44
0301800202	PSP	46.954	-78.2796	B	65	29	6	315	B	Deciduous	Lacustrine	Thick	Moderately well drained	2	4	4west	4b	48.9591	103.893	177.704	1556.51	257.948	152.392	454.625	2628.33	14.4354	17.9057	155.057	429.188	31.7915	8.77487	2.9704	-2.81596	948.668	4846.91	300.477	12.3325	272.526	15.4834
0301800202	PSP	46.954	-78.2796	C	61	33	6	315	B	Deciduous	Lacustrine	Thick	Moderately well drained	2	4	4west	4b	48.9591	103.893	177.704	1556.51	257.948	152.392	454.625	2628.33	14.4354	17.9057	155.057	429.188	31.7915	8.77487	2.9704	-2.81596	948.668	4846.91	300.477	12.3325	272.526	15.4834
0301800301	PSP	46.9841	-78.4176	C	24	67	9	358	B	Mixed	Glacial without particular morphology	Thick	Somewhat poorly drained	5	4	4west	4b	47.8709	102.178	177.153	1536.14	256.581	154.141	459.598	2651.23	14.2379	17.7796	155.402	426.709	32.2637	8.59161	2.8447	-2.93892	952.393	4849.38	306.102	12.1184	272.789	15.1829
0301800302	PSP	46.9857	-78.4124	B	52	40	8	359	B	Deciduous	Glacial without particular morphology	Thick	Moderately well drained	2	4	4west	4b	46.6711	100.772	176.362	1513.8	255.871	153.914	461.211	2648.43	14.115	17.6502	156.098	424.18	32.5613	8.43333	2.71816	-3.02432	956.649	4852.23	310.319	11.9433	274.033	14.9328
0301800302	PSP	46.9857	-78.4124	C	74	21	5	359	B	Deciduous	Glacial without particular morphology	Thick	Moderately well drained	2	4	4west	4b	46.6711	100.772	176.362	1513.8	255.871	153.914	461.211	2648.43	14.115	17.6502	156.098	424.18	32.5613	8.43333	2.71816	-3.02432	956.649	4852.23	310.319	11.9433	274.033	14.9328
0301800401	PSP	47.255	-78.0683	B	89	9	2	378	B	Deciduous	Glacial without particular morphology	Thick	Moderately well drained	1	4	4west	4b	38.6818	81.8057	167.016	1419.03	245.472	143.52	443.787	2520.18	13.9676	17.1027	164.671	411.323	33.5594	7.91191	1.79628	-4.32585	963.546	4909.31	322.423	12.1516	283.594	15.1055
0301800401	PSP	47.255	-78.0683	C	76	19	5	378	B	Deciduous	Glacial without particular morphology	Thick	Moderately well drained	1	4	4west	4b	38.6818	81.8057	167.016	1419.03	245.472	143.52	443.787	2520.18	13.9676	17.1027	164.671	411.323	33.5594	7.91191	1.79628	-4.32585	963.546	4909.31	322.423	12.1516	283.594	15.1055
0502800102	PSP	47.8297	-78.9669	B	78	18	4	301	A	Coniferous	Lacustrine	Thick	Somewhat poorly drained	5	4	4west	4a	43.9427	91.0151	171.219	1490.45	250.031	147.668	443.536	2549.37	14.228	17.4806	160.012	417.923	30.9177	8.06288	2.14612	-3.75772	892.501	4780.47	274.914	12.4906	278.535	15.5651
0502800102	PSP	47.8297	-78.9669	C	46	44	10	301	A	Coniferous	Lacustrine	Thick	Somewhat poorly drained	5	4	4west	4a	43.9427	91.0151	171.219	1490.45	250.031	147.668	443.536	2549.37	14.228	17.4806	160.012	417.923	30.9177	8.06288	2.14612	-3.75772	892.501	4780.47	274.914	12.4906	278.535	15.5651
0504700102	PSP	48.0972	-77.5298	B	84	12	4	341	B	Mixed	Glacial without particular morphology	Thick	Moderately well drained	1	5	5west	5a	32.5925	89.0033	165.739	1391.09	250.656	145.535	464.708	2521.58	13.7857	17.0818	162.654	404.569	30.4327	7.2406	1.33894	-4.54676	901.125	4783.13	273.297	12.0424	296.887	14.7547
0504700102	PSP	48.0972	-77.5298	C	72	19	9	341	B	Mixed	Glacial without particular morphology	Thick	Moderately well drained	1	5	5west	5a	32.5925	89.0033	165.739	1391.09	250.656	145.535	464.708	2521.58	13.7857	17.0818	162.654	404.569	30.4327	7.2406	1.33894	-4.54676	901.125	4783.13	273.297	12.0424	296.887	14.7547
0519800102	PSP	46.129	-70.3159	C	38	32	30	486	A	Mixed	Glacial without particular morphology	Thick	Somewhat poorly drained	2	3	3east	3d	21.4931	107.022	177.677	1420.6	255.683	154.658	583.405	2714.55	13.568	16.8058	149.664	415.306	30.4052	7.87822	2.81945	-2.23457	1113.29	4900.81	337.012	10.5475	374.122	12.9525
0602400102	PSP	46.6537	-75.7467	B	68	26	6	277	C	Deciduous	Glacial without particular morphology	Thick	Moderately well drained	2	3	3west	3b	33.5989	93.9077	180.642	1627.38	250.502	153.071	488.234	2658.91	14.7353	18.2144	157.611	440.819	29.4537	9.55484	3.57168	-2.53443	1002.81	4838.17	294.533	13.1168	297.958	16.5845
0602400201	PSP	47.3025	-75.433	B	90	8	2	392	D	Mixed	Glacial without particular morphology	Thick	Moderately well drained	2	4	4west	4c	25.348	72.0433	162.923	1383.67	238.805	137.249	459.469	2453.08	14.0071	16.789	167.759	410.269	32.9277	8.23958	1.94283	-4.34646	1043.48	4949.18	343.131	12.7908	309.526	15.7651
0602400201	PSP	47.3025	-75.433	C	94	6	0	392	D	Mixed	Glacial without particular morphology	Thick	Moderately well drained	2	4	4west	4c	25.348	72.0433	162.923	1383.67	238.805	137.249	459.469	2453.08	14.0071	16.789	167.759	410.269	32.9277	8.23958	1.94283	-4.34646	1043.48	4949.18	343.131	12.7908	309.526	15.7651
0602500202	PSP	46.3981	-75.5579	B	72	20	8	247	B	Mixed	Glacial without particular morphology	Medium	Moderately well drained	2	3	3west	3b	41.6147	111.118	188.442	1736.75	257.347	163.345	516.827	2776.74	14.9219	18.7664	147.228	453.368	28.6201	9.99664	4.22697	-1.54203	1010	4793.46	288.252	12.8303	294.896	16.2818
0602500202	PSP	46.3981	-75.5579	C	75	17	8	247	B	Mixed	Glacial without particular morphology	Medium	Moderately well drained	2	3	3west	3b	41.6147	111.118	188.442	1736.75	257.347	163.345	516.827	2776.74	14.9219	18.7664	147.228	453.368	28.6201	9.99664	4.22697	-1.54203	1010	4793.46	288.252	12.8303	294.896	16.2818
0602500302	PSP	46.2868	-75.4637	B	66	22	12	287	F	Deciduous	Glacial without particular morphology	Medium	Well drained	2	3	3west	3b	40.8654	104.914	185.644	1662	256.285	162.844	525.024	2787.29	14.5292	18.48	152.371	444.963	29.7106	9.54949	3.83705	-1.87608	1036.91	4820.16	306.683	12.3441	299.804	15.7173
0602500302	PSP	46.2868	-75.4637	C	68	21	11	287	F	Deciduous	Glacial without particular morphology	Medium	Well drained	2	3	3west	3b	40.8654	104.914	185.644	1662	256.285	162.844	525.024	2787.29	14.5292	18.48	152.371	444.963	29.7106	9.54949	3.83705	-1.87608	1036.91	4820.16	306.683	12.3441	299.804	15.7173
0602500401	PSP	46.6906	-74.9628	B	78	16	6	491	C	Deciduous	Glacial without particular morphology	Thick	Moderately well drained	5	4	4west	4b	26.4385	77.6758	165.331	1342.4	242.715	137.354	473.872	2457.97	13.7841	16.6784	166.037	407.219	33.2675	7.86537	1.96049	-3.94862	1079.87	4965.93	358.644	11.7263	318.232	14.5512
0602500401	PSP	46.6906	-74.9628	C	80	16	4	491	C	Deciduous	Glacial without particular morphology	Thick	Moderately well drained	5	4	4west	4b	26.4385	77.6758	165.331	1342.4	242.715	137.354	473.872	2457.97	13.7841	16.6784	166.037	407.219	33.2675	7.86537	1.96049	-3.94862	1079.87	4965.93	358.644	11.7263	318.232	14.5512
0602500501	PSP	46.553	-74.8813	B	74	21	5	305	E	Mixed	Glacial without particular morphology	Thick	Moderately well drained	2	3	3west	3b	34.4106	98.0806	178.941	1599.3	253.379	153.617	516.194	2649.48	14.6104	17.9855	156.298	437.104	29.6621	9.46763	3.43298	-2.60388	1049.14	4856.77	310.436	12.8327	315.394	16.2402
0602500501	PSP	46.553	-74.8813	C	80	20	0	305	E	Mixed	Glacial without particular morphology	Thick	Moderately well drained	2	3	3west	3b	34.4106	98.0806	178.941	1599.3	253.379	153.617	516.194	2649.48	14.6104	17.9855	156.298	437.104	29.6621	9.46763	3.43298	-2.60388	1049.14	4856.77	310.436	12.8327	315.394	16.2402
0602500601	PSP	46.5795	-75.0417	B	77	19	4	396	D	Deciduous	Glacial without particular morphology	Medium	Moderately well drained	2	3	3west	3b	32.6369	89.1908	171.094	1429.67	249.041	144.261	487.255	2547.54	14.022	17.1259	160.851	417.626	32.2795	8.34428	2.49987	-3.33937	1062.85	4924.45	342.264	11.8624	312.716	14.8164
0602500702	PSP	46.5873	-75.4161	B	84	12	4	256	B	Mixed	Juxtaglacial	Thick	Moderately well drained	1	3	3west	3b	36.9592	103.518	184.876	1693.95	254.215	158.491	518.174	2708.74	14.8955	18.52	151.694	448.057	28.9476	9.80838	3.9335	-1.96408	1036.19	4804.13	299.386	12.9674	301.831	16.4034
0602500702	PSP	46.5873	-75.4161	C	96	4	0	256	B	Mixed	Juxtaglacial	Thick	Moderately well drained	1	3	3west	3b	36.9592	103.518	184.876	1693.95	254.215	158.491	518.174	2708.74	14.8955	18.52	151.694	448.057	28.9476	9.80838	3.9335	-1.96408	1036.19	4804.13	299.386	12.9674	301.831	16.4034
0602500802	PSP	46.6675	-74.9438	C	80	16	4	552	C	Deciduous	Glacial without particular morphology	Medium	Moderately well drained	2	3	3west	3b	24.8009	78.1246	165.541	1321.65	243.019	138.033	477.186	2460.17	13.6326	16.5378	165.898	404.788	33.4785	7.67161	1.88716	-3.94197	1082.78	4951.7	361.246	11.335	318.754	14.0801
0602500902	PSP	46.6191	-75.479	B	50	43	7	253	D	Deciduous	Glacial without particular morphology	Medium	Well drained	2	3	3west	3b	35.04	102.325	184.157	1669.98	253.468	157.791	510.032	2696.8	14.7915	18.3671	152.148	445.148	29.1757	9.6237	3.81565	-2.02738	1019.52	4797.49	296.897	12.7518	300.169	16.0906
0619701901	PSP	46.8081	-73.0948	B	64	36	0	315	E	Deciduous	Glacial without particular morphology	Medium	Well drained	2	3	3east	3c	37.2058	98.7894	171.367	1523.58	253.332	151.052	511.517	2753.41	14.4341	17.7628	155.554	429.483	30.4044	9.39797	2.98046	-3.39867	1050.85	5017.71	318.236	13.7132	312.564	16.9719
0619701901	PSP	46.8081	-73.0948	C	78	18	4	315	E	Deciduous	Glacial without particular morphology	Medium	Well drained	2	3	3east	3c	37.2058	98.7894	171.367	1523.58	253.332	151.052	511.517	2753.41	14.4341	17.7628	155.554	429.483	30.4044	9.39797	2.98046	-3.39867	1050.85	5017.71	318.236	13.7132	312.564	16.9719
0619702001	PSP	46.7912	-73.1098	B	58	35	7	244	D	Deciduous	Glacial without particular morphology	Thick	Moderately well drained	2	3	3east	3c	38.2596	100.334	173.536	1573.3	254.254	152.32	514.94	2749.03	14.644	18.0595	154.911	434.883	29.832	9.65304	3.2413	-3.07842	1050.52	4984.76	312.305	13.5708	313.531	17.0205
0619702001	PSP	46.7912	-73.1098	C	78	21	1	244	D	Deciduous	Glacial without particular morphology	Thick	Moderately well drained	2	3	3east	3c	38.2596	100.334	173.536	1573.3	254.254	152.32	514.94	2749.03	14.644	18.0595	154.911	434.883	29.832	9.65304	3.2413	-3.07842	1050.52	4984.76	312.305	13.5708	313.531	17.0205
0619702002	PSP	46.79	-73.1053	B	64	32	4	335	D	Deciduous	Glacial without particular morphology	Thick	Moderately well drained	2	3	3east	3c	32.6516	77.9739	157.676	1364.29	242.1	136.007	470.015	2588.94	14.0677	16.9249	165.118	411.169	32.7468	8.71708	2.06321	-4.64624	1076.5	5175.55	352.293	13.952	320.517	16.9376
0619702002	PSP	46.79	-73.1053	C	74	22	4	335	D	Deciduous	Glacial without particular morphology	Thick	Moderately well drained	2	3	3east	3c	32.6516	77.9739	157.676	1364.29	242.1	136.007	470.015	2588.94	14.0677	16.9249	165.118	411.169	32.7468	8.71708	2.06321	-4.64624	1076.5	5175.55	352.293	13.952	320.517	16.9376
0619803501	PSP	47.2912	-71.1506	B	68	25	7	809	D	Mixed	Glacial without particular morphology	Thick	Moderately well drained	2	5	5east	5e	8.9234	45.5258	137.992	950.104	224.807	113.412	485.844	2343.66	12.1815	13.822	180.286	358.042	44.4542	6.00602	0.0216211	-5.97829	1489.45	5478.62	662.878	10.8063	394.931	12.666
0619803501	PSP	47.2912	-71.1506	C	74	19	7	809	D	Mixed	Glacial without particular morphology	Thick	Moderately well drained	2	5	5east	5e	8.9234	45.5258	137.992	950.104	224.807	113.412	485.844	2343.66	12.1815	13.822	180.286	358.042	44.4542	6.00602	0.0216211	-5.97829	1489.45	5478.62	662.878	10.8063	394.931	12.666
0700200102	PSP	48.1707	-71.0136	B	72	21	7	304	B	Coniferous	Glacial without particular morphology	Thick	Somewhat poorly drained	2	5	5west	5d	26.7773	95.6466	163.759	1379.18	251.312	147.675	467.111	2606.27	13.7354	16.8624	156.665	407.106	32.0977	7.95307	1.86268	-4.23576	929.155	4868.99	298.099	13.2104	303.512	15.9217
0700200102	PSP	48.1707	-71.0136	C	72	12	16	304	B	Coniferous	Glacial without particular morphology	Thick	Somewhat poorly drained	2	5	5west	5d	26.7773	95.6466	163.759	1379.18	251.312	147.675	467.111	2606.27	13.7354	16.8624	156.665	407.106	32.0977	7.95307	1.86268	-4.23576	929.155	4868.99	298.099	13.2104	303.512	15.9217
0700200202	PSP	48.2371	-71.0298	B	78	18	4	298	C	Mixed	Glacial without particular morphology	Thick	Somewhat poorly drained	5	5	5west	5d	31.2259	103.915	165.618	1409.31	254.633	143.574	457.138	2555.7	14.1163	17.0586	151.72	410.163	32.4294	7.9862	1.9972	-3.92807	947.473	4874.49	306.629	13.2533	301.579	15.913
0700200302	PSP	48.1369	-71.5693	B	74	18	8	472	E	Coniferous	Glacial without particular morphology	Thin	Moderately well drained	2	5	5west	5d	21.0632	96.8992	166.576	1298.52	252.727	146.774	535.513	2559.16	13.2361	16.4976	156.832	396.738	34.4959	6.76333	1.50839	-3.71293	1108.27	4865.12	381.457	10.7847	342.356	13.0969
0700200401	PSP	48.6324	-71.3575	B	74	21	5	140	A	Deciduous	Marine and littoral	Thick	Moderately well drained	2	4	4east	4e	23.7896	82.6291	168.568	1449.64	243.821	147.594	524.862	2529.62	14.0931	17.2645	162.183	416.335	29.9625	8.04931	1.87217	-4.30556	1037.6	4712.19	310.456	12.853	333.76	16.2463
0700200401	PSP	48.6324	-71.3575	C	80	16	4	140	A	Deciduous	Marine and littoral	Thick	Moderately well drained	2	4	4east	4e	23.7896	82.6291	168.568	1449.64	243.821	147.594	524.862	2529.62	14.0931	17.2645	162.183	416.335	29.9625	8.04931	1.87217	-4.30556	1037.6	4712.19	310.456	12.853	333.76	16.2463
0700200501	PSP	47.8845	-72.6495	B	78	15	7	260	D	Coniferous	Glacial without particular morphology	Thick	Moderately well drained	2	4	4west	4c	47.2258	109.749	176.561	1594.31	259.481	155.83	481.635	2673.03	14.6267	18.2255	150.736	432.024	30.1298	8.74034	2.91501	-2.79004	926.099	4780.76	277.68	12.6269	297.632	15.693
0700200601	PSP	47.874	-72.1352	B	86	8	6	409	C	Coniferous	Proglacial	Thick	Well drained	2	5	5west	5c	31.1786	99.687	171.702	1410.22	255.151	151.39	518.974	2594.97	13.7175	17.1705	156.461	410.079	32.6795	7.46828	2.09324	-3.25666	1033.13	4805.4	336.034	11.106	325.529	13.7252
0700200601	PSP	47.874	-72.1352	C	82	16	2	409	C	Coniferous	Proglacial	Thick	Well drained	2	5	5west	5c	31.1786	99.687	171.702	1410.22	255.151	151.39	518.974	2594.97	13.7175	17.1705	156.461	410.079	32.6795	7.46828	2.09324	-3.25666	1033.13	4805.4	336.034	11.106	325.529	13.7252
0700200801	PSP	48.1345	-73.1612	B	78	17	5	481	B	Deciduous	Glacial without particular morphology	Thin	Moderately well drained	1	5	5west	5c	45.4583	90.2922	161.957	1333.79	248.738	144.23	414.741	2538.38	13.57	16.7398	159.443	399.52	32.838	7.22482	1.46072	-4.35481	845.848	4852.6	277.092	11.8685	277.38	14.2753
0700200801	PSP	48.1345	-73.1612	C	80	17	3	481	B	Deciduous	Glacial without particular morphology	Thin	Moderately well drained	1	5	5west	5c	45.4583	90.2922	161.957	1333.79	248.738	144.23	414.741	2538.38	13.57	16.7398	159.443	399.52	32.838	7.22482	1.46072	-4.35481	845.848	4852.6	277.092	11.8685	277.38	14.2753
0700200902	PSP	48.0765	-73.4329	B	71	25	4	493	B	Coniferous	Glacial without particular morphology	Medium	Somewhat poorly drained	4	4	4west	4c	44.1647	86.3757	158.029	1261.55	246.652	139.548	402.31	2471.66	13.3257	16.2707	161.284	390.535	33.7233	6.85656	1.04388	-4.60986	844.659	4876.38	285.575	11.5109	276.646	13.8104
0700200902	PSP	48.0765	-73.4329	C	76	19	5	493	B	Coniferous	Glacial without particular morphology	Medium	Somewhat poorly drained	4	4	4west	4c	44.1647	86.3757	158.029	1261.55	246.652	139.548	402.31	2471.66	13.3257	16.2707	161.284	390.535	33.7233	6.85656	1.04388	-4.60986	844.659	4876.38	285.575	11.5109	276.646	13.8104
0700201001	PSP	48.495	-72.2636	B	72	18	10	213	C	Deciduous	Juxtaglacial	Thick	Moderately well drained	1	5	5west	5d	54.2155	120.744	177.278	1555.19	263.25	157.645	462.369	2699.31	14.3455	18.0457	143.517	425.846	31.9281	7.81241	2.57842	-2.41243	891.277	4746.74	283.078	11.5521	286.718	13.9936
0700201001	PSP	48.495	-72.2636	C	88	7	5	213	C	Deciduous	Juxtaglacial	Thick	Moderately well drained	1	5	5west	5d	54.2155	120.744	177.278	1555.19	263.25	157.645	462.369	2699.31	14.3455	18.0457	143.517	425.846	31.9281	7.81241	2.57842	-2.41243	891.277	4746.74	283.078	11.5521	286.718	13.9936
0700201101	PSP	48.0879	-71.5739	B	80	13	7	520	C	Coniferous	Glacial without particular morphology	Thick	Moderately well drained	2	5	5east	5e	16.6954	88.8137	163.702	1252.81	247.554	143.512	551.47	2530.86	13.0646	16.2745	159.741	391.804	34.9612	6.64051	1.30088	-4.05771	1162.36	4928.5	404.659	10.9658	356.672	13.2513
0700201101	PSP	48.0879	-71.5739	C	86	8	6	520	C	Coniferous	Glacial without particular morphology	Thick	Moderately well drained	2	5	5east	5e	16.6954	88.8137	163.702	1252.81	247.554	143.512	551.47	2530.86	13.0646	16.2745	159.741	391.804	34.9612	6.64051	1.30088	-4.05771	1162.36	4928.5	404.659	10.9658	356.672	13.2513
0700201102	PSP	48.0847	-71.5768	B	78	14	8	562	D	Coniferous	Glacial without particular morphology	Medium	Moderately well drained	2	5	5east	5e	15.1418	81.5091	159.237	1204.19	243.784	138.257	535.621	2472.93	12.9431	15.9319	163.276	385.879	35.5905	6.4762	1.02041	-4.45744	1169.84	4985.68	414.662	11.0149	358.412	13.2186
0700201102	PSP	48.0847	-71.5768	C	70	23	7	562	D	Coniferous	Glacial without particular morphology	Medium	Moderately well drained	2	5	5east	5e	15.1418	81.5091	159.237	1204.19	243.784	138.257	535.621	2472.93	12.9431	15.9319	163.276	385.879	35.5905	6.4762	1.02041	-4.45744	1169.84	4985.68	414.662	11.0149	358.412	13.2186
0700201302	PSP	47.8871	-72.9037	B	54	39	7	319	C	Deciduous	Glacial without particular morphology	Thick	Moderately well drained	2	4	4west	4c	49.1253	105.093	172.896	1533.49	257.222	152.009	457.483	2646.74	14.4648	17.8873	153.14	423.976	31.4665	8.32302	2.57901	-3.29036	901.987	4825.86	283.36	12.6339	292.164	15.4366
0700201302	PSP	47.8871	-72.9037	C	80	18	2	319	C	Deciduous	Glacial without particular morphology	Thick	Moderately well drained	2	4	4west	4c	49.1253	105.093	172.896	1533.49	257.222	152.009	457.483	2646.74	14.4648	17.8873	153.14	423.976	31.4665	8.32302	2.57901	-3.29036	901.987	4825.86	283.36	12.6339	292.164	15.4366
0700201401	PSP	48.6413	-71.2559	B	78	20	2	180	A	Coniferous	Fluvial	Thick	Moderately well drained	1	4	4east	4e	20.6783	79.7832	165.91	1414.5	242.098	145.162	528.316	2505.51	13.9887	17.1236	163.312	412.659	29.3983	7.9366	1.71372	-4.51185	1044.13	4729.88	306.665	12.9067	341.307	16.2588
0700201401	PSP	48.6413	-71.2559	C	78	20	2	180	A	Coniferous	Fluvial	Thick	Moderately well drained	1	4	4east	4e	20.6783	79.7832	165.91	1414.5	242.098	145.162	528.316	2505.51	13.9887	17.1236	163.312	412.659	29.3983	7.9366	1.71372	-4.51185	1044.13	4729.88	306.665	12.9067	341.307	16.2588
0700300201	PSP	48.6518	-76.3992	B	40	51	9	521	B	Coniferous	Glacial without particular morphology	Medium	Moderately well drained	2	5	5west	5b	19.6153	70.9318	157.24	1231.53	241.398	134.833	458.508	2307.76	13.241	16.0589	171.467	383.544	30.9722	5.89086	0.288524	-5.29298	915.522	4710.3	283.063	10.8605	315.575	13.2372
0700300201	PSP	48.6518	-76.3992	C	70	24	6	521	B	Coniferous	Glacial without particular morphology	Medium	Moderately well drained	2	5	5west	5b	19.6153	70.9318	157.24	1231.53	241.398	134.833	458.508	2307.76	13.241	16.0589	171.467	383.544	30.9722	5.89086	0.288524	-5.29298	915.522	4710.3	283.063	10.8605	315.575	13.2372
0700300501	PSP	49.696	-79.0272	B	38	28	34	280	B	Coniferous	Glacial without particular morphology	Thick	Somewhat poorly drained	5	6	6west	6a	22.8271	57.9262	147.929	1210.1	233.123	123.543	419.478	2154.3	13.5188	15.9311	176.197	379.313	32.5493	6.09276	-0.111691	-6.32054	907.521	4775.88	294.975	12.7079	307.706	15.3814
0700300501	PSP	49.696	-79.0272	C	32	26	42	280	B	Coniferous	Glacial without particular morphology	Thick	Somewhat poorly drained	5	6	6west	6a	22.8271	57.9262	147.929	1210.1	233.123	123.543	419.478	2154.3	13.5188	15.9311	176.197	379.313	32.5493	6.09276	-0.111691	-6.32054	907.521	4775.88	294.975	12.7079	307.706	15.3814
0700300702	PSP	49.2038	-77.8834	B	16	10	74	310	A	Mixed	Lacustrine	Thick	Somewhat poorly drained	6	6	6west	6a	25.3046	62.409	155.48	1296.6	235.928	130.913	434.581	2242.93	13.7602	16.3304	174.531	390.596	30.5124	6.66289	0.61948	-5.47918	884.613	4706.73	269.584	12.6349	303.822	15.4777
0700300702	PSP	49.2038	-77.8834	C	16	5	79	310	A	Mixed	Lacustrine	Thick	Somewhat poorly drained	6	6	6west	6a	25.3046	62.409	155.48	1296.6	235.928	130.913	434.581	2242.93	13.7602	16.3304	174.531	390.596	30.5124	6.66289	0.61948	-5.47918	884.613	4706.73	269.584	12.6349	303.822	15.4777
0800100402	PSP	45.7882	-74.4162	B	78	16	6	326	A	Deciduous	Glacial without particular morphology	Medium	Very poorly drained	8	3	3east	3c	32.7635	123.003	193.1	1742.76	262.901	169.771	593.683	2863.22	14.7397	18.7185	140.892	455.252	28.729	10.0423	4.6401	-0.797711	1134.54	4823.03	325.482	11.9831	333.131	15.2225
0800100402	PSP	45.7882	-74.4162	C	78	16	6	326	A	Deciduous	Glacial without particular morphology	Medium	Very poorly drained	8	3	3east	3c	32.7635	123.003	193.1	1742.76	262.901	169.771	593.683	2863.22	14.7397	18.7185	140.892	455.252	28.729	10.0423	4.6401	-0.797711	1134.54	4823.03	325.482	11.9831	333.131	15.2225
0800100602	PSP	45.3141	-71.3388	B	62	25	13	459	A	Deciduous	Glacial without particular morphology	Thick	Poorly drained	8	3	3east	3d	21.6583	124.76	193.338	1654.58	263.057	167.495	620.361	2897.28	14.2522	17.8902	139.299	444.64	31.468	9.34973	4.38525	-0.55131	1227.63	4937.88	385.296	10.8507	367.626	13.2337
0800100602	PSP	45.3141	-71.3388	C	50	32	18	459	A	Deciduous	Glacial without particular morphology	Thick	Poorly drained	8	3	3east	3d	21.6583	124.76	193.338	1654.58	263.057	167.495	620.361	2897.28	14.2522	17.8902	139.299	444.64	31.468	9.34973	4.38525	-0.55131	1227.63	4937.88	385.296	10.8507	367.626	13.2337
0901200101	PSP	46.2188	-72.4548	B	54	16	30	60	A	Coniferous	Marine and littoral	Thick	Somewhat poorly drained	5	2	2east	2b	59.2063	140.317	200.844	1889.4	269.458	182.372	546.084	3036.17	15.0063	19.624	130.14	473.622	27.0568	10.3957	5.1668	-0.0501784	962.896	4738.6	261.122	12.1734	286.552	15.6308
0901200101	PSP	46.2188	-72.4548	C	47	17	36	60	A	Coniferous	Marine and littoral	Thick	Somewhat poorly drained	5	2	2east	2b	59.2063	140.317	200.844	1889.4	269.458	182.372	546.084	3036.17	15.0063	19.624	130.14	473.622	27.0568	10.3957	5.1668	-0.0501784	962.896	4738.6	261.122	12.1734	286.552	15.6308
0901200101	PSP	46.2188	-72.4548	C	47	17	36	60	A	Coniferous	Marine and littoral	Thick	Somewhat poorly drained	5	2	2east	2b	59.2063	140.317	200.844	1889.4	269.458	182.372	546.084	3036.17	15.0063	19.624	130.14	473.622	27.0568	10.3957	5.1668	-0.0501784	962.896	4738.6	261.122	12.1734	286.552	15.6308
0901200401	PSP	45.9818	-72.1752	B	87	6	7	105	B	Mixed	Marine and littoral	Thick	Moderately well drained	1	2	2east	2b	42.154	129.051	200.496	1929.61	264.006	176.011	572.956	2931.22	15.3911	19.4844	135.951	477.422	25.7658	10.8257	5.42093	-0.036931	1027.51	4723.33	264.663	12.545	318.303	15.9171
0901200401	PSP	45.9818	-72.1752	C	87	3	10	105	B	Mixed	Marine and littoral	Thick	Moderately well drained	1	2	2east	2b	42.154	129.051	200.496	1929.61	264.006	176.011	572.956	2931.22	15.3911	19.4844	135.951	477.422	25.7658	10.8257	5.42093	-0.036931	1027.51	4723.33	264.663	12.545	318.303	15.9171
0901200401	PSP	45.9818	-72.1752	C	87	3	10	105	B	Mixed	Marine and littoral	Thick	Moderately well drained	1	2	2east	2b	42.154	129.051	200.496	1929.61	264.006	176.011	572.956	2931.22	15.3911	19.4844	135.951	477.422	25.7658	10.8257	5.42093	-0.036931	1027.51	4723.33	264.663	12.545	318.303	15.9171
0901200402	PSP	45.9817	-72.1699	B	79	8	13	105	A	Deciduous	Marine and littoral	Thick	Moderately well drained	1	2	2east	2b	42.154	129.051	200.496	1929.61	264.006	176.011	572.956	2931.22	15.3911	19.4844	135.951	477.422	25.7658	10.8257	5.42093	-0.036931	1027.51	4723.33	264.663	12.545	318.303	15.9171
0901200402	PSP	45.9817	-72.1699	C	92	4	4	105	A	Deciduous	Marine and littoral	Thick	Moderately well drained	1	2	2east	2b	42.154	129.051	200.496	1929.61	264.006	176.011	572.956	2931.22	15.3911	19.4844	135.951	477.422	25.7658	10.8257	5.42093	-0.036931	1027.51	4723.33	264.663	12.545	318.303	15.9171
0919700101	PSP	45.9113	-72.6651	B	85	6	9	62	A	Deciduous	Marine and littoral	Thick	Somewhat poorly drained	5	2	2east	2b	53.0365	141.713	207.386	2057.81	269.935	187.313	593.631	3061.07	15.5868	20.3427	129.223	492.743	25.6498	11.1028	5.91983	0.720873	1025.82	4685.05	262.818	12.5274	302.13	16.1716
0919700101	PSP	45.9113	-72.6651	C	69	18	13	62	A	Deciduous	Marine and littoral	Thick	Somewhat poorly drained	5	2	2east	2b	53.0365	141.713	207.386	2057.81	269.935	187.313	593.631	3061.07	15.5868	20.3427	129.223	492.743	25.6498	11.1028	5.91983	0.720873	1025.82	4685.05	262.818	12.5274	302.13	16.1716
0919700201	PSP	46.0211	-72.6007	B	79	10	11	59	A	Coniferous	Marine and littoral	Thick	Somewhat poorly drained	5	2	2east	2b	61.2405	135.759	203.003	1947.52	266.19	184.076	566.345	3074.36	15.1915	19.9289	131.429	479.301	28.0965	10.5229	5.30339	0.0490572	1029.87	4747.23	289.345	12.3832	286.511	16.1324
0919700201	PSP	46.0211	-72.6007	C	87	6	7	59	A	Coniferous	Marine and littoral	Thick	Somewhat poorly drained	5	2	2east	2b	61.2405	135.759	203.003	1947.52	266.19	184.076	566.345	3074.36	15.1915	19.9289	131.429	479.301	28.0965	10.5229	5.30339	0.0490572	1029.87	4747.23	289.345	12.3832	286.511	16.1324
0919700302	PSP	46.0757	-72.9684	B	17	34	49	9	A	Deciduous	Marine and littoral	Thick	Poorly drained	8	1	1	1a	70.966	166.415	216.722	2150.88	284.558	198.343	592.328	3118.67	15.5619	20.816	119.146	505.959	25.0862	11.0793	6.46136	1.95495	975.861	4571.87	244.507	11.0069	287.192	14.5012
0919700302	PSP	46.0757	-72.9684	C	17	34	49	9	A	Deciduous	Marine and littoral	Thick	Poorly drained	8	1	1	1a	70.966	166.415	216.722	2150.88	284.558	198.343	592.328	3118.67	15.5619	20.816	119.146	505.959	25.0862	11.0793	6.46136	1.95495	975.861	4571.87	244.507	11.0069	287.192	14.5012
0919700401	PSP	46.0194	-72.7865	B	91	4	5	36	A	Mixed	Marine and littoral	Thick	Somewhat poorly drained	5	2	2east	2b	60.2668	149.818	209.074	2053.38	274.574	190.308	576.693	3094.98	15.4482	20.3076	125.758	493.142	26.1367	10.9246	5.90128	0.88588	990.538	4668.83	258.97	12.1118	289.699	15.6701
0919700401	PSP	46.0194	-72.7865	C	25	12	63	36	A	Mixed	Marine and littoral	Thick	Somewhat poorly drained	5	2	2east	2b	60.2668	149.818	209.074	2053.38	274.574	190.308	576.693	3094.98	15.4482	20.3076	125.758	493.142	26.1367	10.9246	5.90128	0.88588	990.538	4668.83	258.97	12.1118	289.699	15.6701
0919700501	PSP	46.0652	-72.6423	B	85	5	10	50	A	Mixed	Marine and littoral	Thick	Somewhat poorly drained	5	2	2east	2b	61.781	136.011	202.63	1941.56	266.281	184.094	562.298	3074.75	15.1713	19.9207	131.268	478.621	28.2146	10.4671	5.24163	0.0039526	1020.95	4744.42	287.744	12.3721	282.999	16.1011
0919700501	PSP	46.0652	-72.6423	C	90	5	5	50	A	Mixed	Marine and littoral	Thick	Somewhat poorly drained	5	2	2east	2b	61.781	136.011	202.63	1941.56	266.281	184.094	562.298	3074.75	15.1713	19.9207	131.268	478.621	28.2146	10.4671	5.24163	0.0039526	1020.95	4744.42	287.744	12.3721	282.999	16.1011
0919700602	PSP	46.0362	-72.6169	B	87	6	7	52	A	Deciduous	Marine and littoral	Thick	Somewhat poorly drained	5	2	2east	2b	61.5841	136.622	203.652	1955.77	266.702	184.985	565.051	3072.66	15.2003	19.9539	131.079	480.476	27.9556	10.4781	5.31571	0.0438092	1021.36	4731.23	285.1	12.3758	284.772	16.12
0919700602	PSP	46.0362	-72.6169	C	90	4	6	52	A	Deciduous	Marine and littoral	Thick	Somewhat poorly drained	5	2	2east	2b	61.5841	136.622	203.652	1955.77	266.702	184.985	565.051	3072.66	15.2003	19.9539	131.079	480.476	27.9556	10.4781	5.31571	0.0438092	1021.36	4731.23	285.1	12.3758	284.772	16.12
0919700701	PSP	45.5501	-72.4259	B	38	46	16	194	A	Deciduous	Fluvial	Thick	Somewhat poorly drained	5	2	2east	2c	31.3092	124.126	198.703	1832.01	262.788	174.847	604.174	2936.24	14.9	19.1019	139.663	465.776	28.6064	10.3647	5.0917	-0.216481	1143.66	4799.22	328.284	11.7753	343.732	14.8951
0919700701	PSP	45.5501	-72.4259	B	38	46	16	194	A	Deciduous	Fluvial	Thick	Somewhat poorly drained	5	2	2east	2c	31.3092	124.126	198.703	1832.01	262.788	174.847	604.174	2936.24	14.9	19.1019	139.663	465.776	28.6064	10.3647	5.0917	-0.216481	1143.66	4799.22	328.284	11.7753	343.732	14.8951
0919701001	PSP	46.2955	-72.5145	B	16	36	48	9	A	Deciduous	Fluvial	Thick	Somewhat poorly drained	6	2	2east	2b	67.0001	165.034	210.911	2014.69	283.883	191.03	563.521	3031.47	15.3	20.3071	119.854	488.81	27.63	10.4279	5.86786	1.45372	984.411	4597.34	272.263	10.6148	288.338	13.9627
0919701001	PSP	46.2955	-72.5145	C	61	17	22	9	A	Deciduous	Fluvial	Thick	Somewhat poorly drained	6	2	2east	2b	67.0001	165.034	210.911	2014.69	283.883	191.03	563.521	3031.47	15.3	20.3071	119.854	488.81	27.63	10.4279	5.86786	1.45372	984.411	4597.34	272.263	10.6148	288.338	13.9627
1000200102	PSP	47.5033	-73.163	B	55	40	5	279	D	Deciduous	Glacial without particular morphology	Thick	Moderately well drained	2	4	4west	4c	41.3019	92.3392	165.402	1483.7	251.696	140.519	441.967	2509.29	14.6268	17.5367	160.353	421.174	30.2037	8.94929	2.40292	-4.22801	927.864	4926.88	279.336	13.9988	294.969	17.2605
1000200102	PSP	47.5033	-73.163	C	60	35	5	279	D	Deciduous	Glacial without particular morphology	Thick	Moderately well drained	2	4	4west	4c	41.3019	92.3392	165.402	1483.7	251.696	140.519	441.967	2509.29	14.6268	17.5367	160.353	421.174	30.2037	8.94929	2.40292	-4.22801	927.864	4926.88	279.336	13.9988	294.969	17.2605
1000200202	PSP	47.5229	-73.0964	B	70	22	8	278	D	Deciduous	Glacial without particular morphology	Thick	Moderately well drained	2	4	4west	4c	41.2299	93.6952	165.636	1483.45	252.345	141.423	445.709	2519.97	14.5984	17.5607	159.65	421.16	30.2262	8.93057	2.41071	-4.10481	927.457	4920.86	279.447	13.8148	295.249	17.0703
1000200202	PSP	47.5229	-73.0964	C	59	33	8	278	D	Deciduous	Glacial without particular morphology	Thick	Moderately well drained	2	4	4west	4c	41.2299	93.6952	165.636	1483.45	252.345	141.423	445.709	2519.97	14.5984	17.5607	159.65	421.16	30.2262	8.93057	2.41071	-4.10481	927.457	4920.86	279.447	13.8148	295.249	17.0703
1000200302	PSP	47.5457	-73.0582	B	62	24	14	300	D	Deciduous	Glacial without particular morphology	Thick	Moderately well drained	2	4	4west	4c	41.1304	93.3593	165.885	1474.09	252.31	141.211	444.124	2507.7	14.5313	17.4759	159.952	420.034	30.302	8.81752	2.37483	-4.06813	921.945	4911.75	278.62	13.6414	295.902	16.8432
1000200302	PSP	47.5457	-73.0582	C	76	14	10	300	D	Deciduous	Glacial without particular morphology	Thick	Moderately well drained	2	4	4west	4c	41.1304	93.3593	165.885	1474.09	252.31	141.211	444.124	2507.7	14.5313	17.4759	159.952	420.034	30.302	8.81752	2.37483	-4.06813	921.945	4911.75	278.62	13.6414	295.902	16.8432
1000200402	PSP	47.581	-73.1951	B	83	12	5	312	B	Deciduous	Glacial without particular morphology	Thick	Moderately well drained	2	4	4west	4c	41.5589	91.7204	164.206	1464.1	251.433	139.371	435.649	2495.68	14.5564	17.4642	160.712	418.759	30.7452	8.82579	2.27138	-4.26267	921.77	4937.23	282.705	13.7921	293.817	16.9587
1000200402	PSP	47.581	-73.1951	C	84	12	4	312	B	Deciduous	Glacial without particular morphology	Thick	Moderately well drained	2	4	4west	4c	41.5589	91.7204	164.206	1464.1	251.433	139.371	435.649	2495.68	14.5564	17.4642	160.712	418.759	30.7452	8.82579	2.27138	-4.26267	921.77	4937.23	282.705	13.7921	293.817	16.9587
1000300101	PSP	49.2642	-73.9021	B	96	1	3	417	C	Deciduous	Glacial without particular morphology	Thick	Moderately well drained	2	6	6west	6e	24.4296	88.4358	156.52	1268.84	249.87	132.016	446.094	2327.3	13.692	16.1391	162.432	387.923	33.5404	6.68021	0.59064	-5.5114	954.358	4814.97	319.732	12.7604	310.639	15.3119
1000300202	PSP	49.648	-73.3257	B	92	2	6	329	A	Coniferous	Proglacial	Thick	Well drained	1	6	6west	6e	24.4773	85.3818	153.654	1263.16	248.29	128.972	433.535	2281.29	13.8062	16.1832	163.909	387.077	34.3394	6.67293	0.340956	-6.01964	962.956	4811.26	330.178	13.2683	308.16	15.9559
1000300202	PSP	49.648	-73.3257	C	94	1	5	329	A	Coniferous	Proglacial	Thick	Well drained	1	6	6west	6e	24.4773	85.3818	153.654	1263.16	248.29	128.972	433.535	2281.29	13.8062	16.1832	163.909	387.077	34.3394	6.67293	0.340956	-6.01964	962.956	4811.26	330.178	13.2683	308.16	15.9559
1000300202	PSP	49.648	-73.3257	C	94	1	5	329	A	Coniferous	Proglacial	Thick	Well drained	1	6	6west	6e	24.4773	85.3818	153.654	1263.16	248.29	128.972	433.535	2281.29	13.8062	16.1832	163.909	387.077	34.3394	6.67293	0.340956	-6.01964	962.956	4811.26	330.178	13.2683	308.16	15.9559
1000400101	PSP	46.231	-70.846	B	7	14	79	201	C	Deciduous	Glacial without particular morphology	Medium	Moderately well drained	2	3	3east	3d	38.6245	123.522	188.538	1748.88	262.762	162.235	545.554	2804.78	15.096	18.6636	140.225	456.551	29.5023	10.4851	4.72951	-0.962852	1089.03	4877.36	320.502	13.2279	332.115	16.343
1000400202	PSP	46.0345	-70.744	C	48	26	26	345	C	Deciduous	Glacial without particular morphology	Medium	Moderately well drained	3	3	3east	3d	32.0551	111.139	184.362	1652.69	256.903	160.68	571.654	2770.32	14.6289	18.1833	146.765	444.699	29.2445	9.85575	4.23346	-1.37156	1099.33	4851.04	318.941	12.4367	348.118	15.4833
1000400301	PSP	46.2804	-71.3218	B	62	26	12	400	C	Deciduous	Glacial without particular morphology	Medium	Moderately well drained	2	3	3east	3d	22.8014	121.959	189.64	1607.16	262.775	166.886	632.52	2815.63	14.0966	17.8321	141.815	437.742	32.0087	8.74519	3.91899	-0.893775	1231.15	4803	393.168	10.4081	374.591	12.8654
1000400501	PSP	46.0024	-71.1061	B	40	30	30	380	B	Coniferous	Glacial without particular morphology	Thick	Somewhat poorly drained	6	3	3east	3d	25.0999	124.995	188.487	1659.1	264.035	165.682	608.081	2856.55	14.4679	18.1344	140.042	444.396	30.4446	9.42095	4.22478	-0.96852	1166.17	4885.92	353.168	11.836	364.339	14.4004
1000400602	PSP	47.8969	-74.586	B	80	12	8	486	D	Mixed	Glacial without particular morphology	Medium	Moderately well drained	1	5	5west	5c	27.5239	91.0937	162.961	1328.38	249.793	137.044	460.751	2458.28	13.7697	16.3976	159.706	398.634	35.2492	7.32576	1.32743	-4.74362	1043.9	4942.91	370.129	12.2201	316.151	14.6122
1004900102	PSP	46.9843	-72.3376	B	67	24	9	323	D	Deciduous	Glacial without particular morphology	Medium	Moderately well drained	2	3	3east	3c	21.5918	90.9348	165.472	1422.93	248.794	140.726	531.587	2534.5	14.2266	17.3864	158.872	418.025	30.697	8.75219	2.3245	-4.29322	1145.32	5026.81	350.98	13.1464	347.638	16.1416
1004900102	PSP	46.9843	-72.3376	C	68	24	8	323	D	Deciduous	Glacial without particular morphology	Medium	Moderately well drained	2	3	3east	3c	21.5918	90.9348	165.472	1422.93	248.794	140.726	531.587	2534.5	14.2266	17.3864	158.872	418.025	30.697	8.75219	2.3245	-4.29322	1145.32	5026.81	350.98	13.1464	347.638	16.1416
1019700801	PSP	45.8314	-70.8042	B	31	41	28	497	B	Deciduous	Slope and in situ weathered	Medium	Moderately well drained	3	3	3east	3d	32.8846	122.183	187.237	1544.47	263.651	164.498	557.056	2798.5	13.8334	17.6834	142.466	430.847	26.4133	8.5639	3.7261	-1.06604	969.304	4785.73	256.94	10.1601	335.532	12.3742
1019700801	PSP	45.8314	-70.8042	B	31	41	28	497	B	Deciduous	Slope and in situ weathered	Medium	Moderately well drained	3	3	3east	3d	32.8846	122.183	187.237	1544.47	263.651	164.498	557.056	2798.5	13.8334	17.6834	142.466	430.847	26.4133	8.5639	3.7261	-1.06604	969.304	4785.73	256.94	10.1601	335.532	12.3742
1019700801	PSP	45.8314	-70.8042	C	53	30	17	497	B	Deciduous	Slope and in situ weathered	Medium	Moderately well drained	3	3	3east	3d	32.8846	122.183	187.237	1544.47	263.651	164.498	557.056	2798.5	13.8334	17.6834	142.466	430.847	26.4133	8.5639	3.7261	-1.06604	969.304	4785.73	256.94	10.1601	335.532	12.3742
1019700801	PSP	45.8314	-70.8042	C	53	30	17	497	B	Deciduous	Slope and in situ weathered	Medium	Moderately well drained	3	3	3east	3d	32.8846	122.183	187.237	1544.47	263.651	164.498	557.056	2798.5	13.8334	17.6834	142.466	430.847	26.4133	8.5639	3.7261	-1.06604	969.304	4785.73	256.94	10.1601	335.532	12.3742
1103300101	PSP	46.5001	-73.026	B	86	10	4	263	C	Non-forested	Glacial without particular morphology	Medium	Moderately well drained	2	3	3east	3c	35.9594	98.8011	171.54	1558	251.766	150.197	532.367	2788.15	14.6408	18.0583	153.962	433.851	30.597	9.70154	3.2513	-3.15622	1115.5	5099.2	340.353	14.1325	330.094	17.4278
1103300202	PSP	46.8298	-72.6311	B	53	38	9	398	C	Non-forested	Glacial without particular morphology	Medium	Moderately well drained	5	3	3east	3c	26.8776	67.8221	148.422	1282.6	236.176	122.491	437.307	2394.26	14.0766	16.5218	169.357	404.45	33.5182	8.83346	1.63167	-5.55455	1105.9	5306.18	369.874	14.4777	327.219	17.2927
1103300202	PSP	46.8298	-72.6311	B	53	38	9	398	C	Non-forested	Glacial without particular morphology	Medium	Moderately well drained	5	3	3east	3c	26.8776	67.8221	148.422	1282.6	236.176	122.491	437.307	2394.26	14.0766	16.5218	169.357	404.45	33.5182	8.83346	1.63167	-5.55455	1105.9	5306.18	369.874	14.4777	327.219	17.2927
1103300202	PSP	46.8298	-72.6311	C	80	13	7	398	C	Non-forested	Glacial without particular morphology	Medium	Moderately well drained	5	3	3east	3c	26.8776	67.8221	148.422	1282.6	236.176	122.491	437.307	2394.26	14.0766	16.5218	169.357	404.45	33.5182	8.83346	1.63167	-5.55455	1105.9	5306.18	369.874	14.4777	327.219	17.2927
1103300301	PSP	47.2333	-72.7072	B	67	28	5	400	D	Non-forested	Glacial without particular morphology	Thick	Moderately well drained	2	3	3east	3c	35.8586	85.9152	161.694	1414.63	247.219	134.783	442.865	2454.57	14.4106	17.1783	162.303	415.288	30.8207	8.86397	2.20778	-4.44892	972.506	5010.98	298.722	13.7339	305.732	16.864
1103300301	PSP	47.2333	-72.7072	C	70	24	6	400	D	Non-forested	Glacial without particular morphology	Thick	Moderately well drained	2	3	3east	3c	35.8586	85.9152	161.694	1414.63	247.219	134.783	442.865	2454.57	14.4106	17.1783	162.303	415.288	30.8207	8.86397	2.20778	-4.44892	972.506	5010.98	298.722	13.7339	305.732	16.864
1103400102	PSP	46.4639	-73.4298	C	78	17	5	456	D	Non-forested	Glacial without particular morphology	Medium	Moderately well drained	2	3	3east	3c	30.1406	87.754	163.096	1358.49	247.138	140.186	501.693	2599.07	13.8785	16.7622	160.385	408.839	32.9616	8.39807	2.19801	-4.03287	1107.37	5122.66	363.56	12.5827	332.61	15.0856
1103400201	PSP	45.766	-73.5331	B	89	5	6	22	A	Non-forested	Marine and littoral	Thick	Moderately well drained	1	1	1	1a	67.9504	153.403	208.783	2145.58	276.491	189.416	561.165	3093.22	15.971	20.9568	124.089	503.572	25.8603	11.5726	6.37015	1.16478	978.28	4722.88	252.911	12.9688	274.4	16.9035
1103400201	PSP	45.766	-73.5331	B	89	5	6	22	A	Non-forested	Marine and littoral	Thick	Moderately well drained	1	1	1	1a	67.9504	153.403	208.783	2145.58	276.491	189.416	561.165	3093.22	15.971	20.9568	124.089	503.572	25.8603	11.5726	6.37015	1.16478	978.28	4722.88	252.911	12.9688	274.4	16.9035
1103400201	PSP	45.766	-73.5331	C	93	0	7	22	A	Non-forested	Marine and littoral	Thick	Moderately well drained	1	1	1	1a	67.9504	153.403	208.783	2145.58	276.491	189.416	561.165	3093.22	15.971	20.9568	124.089	503.572	25.8603	11.5726	6.37015	1.16478	978.28	4722.88	252.911	12.9688	274.4	16.9035
1103400201	PSP	45.766	-73.5331	C	91	2	7	22	A	Non-forested	Marine and littoral	Thick	Moderately well drained	1	1	1	1a	67.9504	153.403	208.783	2145.58	276.491	189.416	561.165	3093.22	15.971	20.9568	124.089	503.572	25.8603	11.5726	6.37015	1.16478	978.28	4722.88	252.911	12.9688	274.4	16.9035
1119700102	PSP	47.5768	-69.5288	B	64	20	16	277	B	Non-forested	Glacial characterized by its morphology	Thick	Somewhat poorly drained	6	4	4east	4f	53.1923	110.23	176.511	1440.86	258.351	161.869	509.089	2831.82	13.5037	17.274	149.123	417.531	34.7398	8.0303	2.9096	-2.17071	1026.09	4853.6	356.034	11.1951	298.873	13.9824
1119710202	PSP	45.346	-71.2316	C	44	36	20	508	B	Non-forested	Glacial without particular morphology	Thick	Somewhat poorly drained	6	3	3east	3d	18.2802	121.043	190.464	1566.44	261.632	164.748	632.283	2872.86	13.8893	17.4421	141.591	434.333	33.5111	8.75179	3.93854	-0.871917	1301.71	4971.47	434.663	10.2385	377.059	12.4458
1119710202	PSP	45.346	-71.2316	C	44	36	20	508	B	Non-forested	Glacial without particular morphology	Thick	Somewhat poorly drained	6	3	3east	3d	18.2802	121.043	190.464	1566.44	261.632	164.748	632.283	2872.86	13.8893	17.4421	141.591	434.333	33.5111	8.75179	3.93854	-0.871917	1301.71	4971.47	434.663	10.2385	377.059	12.4458
1202600201	PSP	49.2499	-74.9778	B	32	59	9	379	A	Non-forested	Lacustrine	Thick	Poorly drained	7	6	6west	6c	23.5651	93.0639	161.049	1314.63	251.427	138.522	473.508	2397.44	13.6823	16.4699	159.363	392.871	33.4316	6.47413	0.764401	-4.94439	969.302	4782.5	323.535	12.1846	313.701	14.76
1202600201	PSP	49.2499	-74.9778	C	36	57	7	379	A	Non-forested	Lacustrine	Thick	Poorly drained	7	6	6west	6c	23.5651	93.0639	161.049	1314.63	251.427	138.522	473.508	2397.44	13.6823	16.4699	159.363	392.871	33.4316	6.47413	0.764401	-4.94439	969.302	4782.5	323.535	12.1846	313.701	14.76
1202600201	PSP	49.2499	-74.9778	C	36	57	7	379	A	Non-forested	Lacustrine	Thick	Poorly drained	7	6	6west	6c	23.5651	93.0639	161.049	1314.63	251.427	138.522	473.508	2397.44	13.6823	16.4699	159.363	392.871	33.4316	6.47413	0.764401	-4.94439	969.302	4782.5	323.535	12.1846	313.701	14.76
1202600301	PSP	49.5143	-74.9763	B	69	20	11	360	B	Non-forested	Glacial without particular morphology	Thin	Moderately well drained	2	6	6west	6c	22.1244	92.3935	160.766	1308.09	250.985	137.839	478.725	2386.76	13.6726	16.4617	159.592	391.371	33.5417	6.26949	0.635366	-4.99119	980.433	4760.14	328.304	12.1114	318.159	14.7369
1202600402	PSP	48.7461	-75.4788	B	49	43	8	411	C	Non-forested	Glacial without particular morphology	Thick	Somewhat poorly drained	5	6	6west	6c	24.1566	93.5656	162.873	1329.21	251.931	138.762	467.97	2412.42	13.7475	16.4865	159.365	395.996	32.7971	6.78706	1.08537	-4.61828	965.858	4793.23	316.658	12.0597	313.079	14.553
1202600402	PSP	48.7461	-75.4788	C	55	39	6	411	C	Non-forested	Glacial without particular morphology	Thick	Somewhat poorly drained	5	6	6west	6c	24.1566	93.5656	162.873	1329.21	251.931	138.762	467.97	2412.42	13.7475	16.4865	159.365	395.996	32.7971	6.78706	1.08537	-4.61828	965.858	4793.23	316.658	12.0597	313.079	14.553
1202600402	PSP	48.7461	-75.4788	C	55	39	6	411	C	Non-forested	Glacial without particular morphology	Thick	Somewhat poorly drained	5	6	6west	6c	24.1566	93.5656	162.873	1329.21	251.931	138.762	467.97	2412.42	13.7475	16.4865	159.365	395.996	32.7971	6.78706	1.08537	-4.61828	965.858	4793.23	316.658	12.0597	313.079	14.553
1202600502	PSP	49.1	-74.7437	B	77	16	7	459	C	Non-forested	Glacial without particular morphology	Thick	Moderately well drained	2	6	6west	6e	23.8242	93.2445	160.461	1294.86	251.651	135.817	459.667	2365.44	13.6871	16.2793	159.406	390.364	33.5839	6.50974	0.829443	-4.87375	962.934	4796.88	322.927	11.9824	311.09	14.4177
1202600502	PSP	49.1	-74.7437	C	70	27	3	459	C	Non-forested	Glacial without particular morphology	Thick	Moderately well drained	2	6	6west	6e	23.8242	93.2445	160.461	1294.86	251.651	135.817	459.667	2365.44	13.6871	16.2793	159.406	390.364	33.5839	6.50974	0.829443	-4.87375	962.934	4796.88	322.927	11.9824	311.09	14.4177
1202600502	PSP	49.1	-74.7437	C	70	27	3	459	C	Non-forested	Glacial without particular morphology	Thick	Moderately well drained	2	6	6west	6e	23.8242	93.2445	160.461	1294.86	251.651	135.817	459.667	2365.44	13.6871	16.2793	159.406	390.364	33.5839	6.50974	0.829443	-4.87375	962.934	4796.88	322.927	11.9824	311.09	14.4177
1202600602	PSP	49.5307	-72.2656	B	74	17	9	360	C	Non-forested	Glacial without particular morphology	Thick	Moderately well drained	2	5	5west	5d	30.8531	65.5055	149.431	1206.34	235.258	129.025	397.987	2305.25	13.4207	15.9994	170.751	382.342	35.9454	6.34499	0.0650497	-6.21674	916.548	4838.5	329.651	12.5165	285.852	15.244
1202600602	PSP	49.5307	-72.2656	C	80	12	8	360	C	Non-forested	Glacial without particular morphology	Thick	Moderately well drained	2	5	5west	5d	30.8531	65.5055	149.431	1206.34	235.258	129.025	397.987	2305.25	13.4207	15.9994	170.751	382.342	35.9454	6.34499	0.0650497	-6.21674	916.548	4838.5	329.651	12.5165	285.852	15.244
1202600702	PSP	50.0209	-75.4888	B	94	0	6	350	C	Non-forested	Proglacial	Thick	Well drained	1	6	6west	6c	20.6988	89.278	157.895	1275.6	249.784	133.937	470.274	2321.2	13.6482	16.1992	161.504	386.67	33.8122	5.98291	0.330433	-5.31742	980.737	4732.79	331.117	12.176	320.302	14.7119
[truncated: 28,271 more rows]
